# Supplementary material for: Cell Type-Specific Differentiation Between Indica and Japonica Rice Root Tip Responses to Different Environments Based on Single-Cell RNA Sequencing
Source: Front Genet. 2021 May 17;12:659500. doi: 10.3389/fgene.2021.659500 (PMC8166412; doi:10.3389/fgene.2021.659500)
Supplement: Supplementary file 11 [file Table_4.XLS]

## Sheet: Metaxylam
Supplementary table 4. Differential expression genes between indica and japonica rice varieties in metaxylem
p_val	avg_logFC	pct.1	pct.2	p_val_adj	cluster	gene
6.59429e-11	1.54231	1	1	1.70805e-06	9311	LOC_Os07g39680
6.71141e-10	4.94696	1	0	1.73839e-05	9311	LOC_Os02g48710
6.71141e-10	4.39764	1	0	1.73839e-05	9311	LOC_Os10g28170
6.71141e-10	3.04512	1	0	1.73839e-05	9311	LOC_Os06g47239
6.71141e-10	2.84237	1	0	1.73839e-05	9311	LOC_Os10g34801
1.66132e-09	3.32058	1	0.789	4.30316e-05	9311	LOC_Os01g05064
3.34051e-09	1.94161	0.972	0.211	8.6526e-05	9311	LOC_Os06g08564
4.26233e-09	3.55249	0.944	0	0.000110403	9311	LOC_Os01g68950
4.26233e-09	2.55065	0.944	0	0.000110403	9311	LOC_Os09g30254
6.99846e-09	1.16688	1	1	0.000181274	9311	LOC_Os02g06640
8.2487e-09	1.90737	1	1	0.000213658	9311	LOC_Os05g05940
8.60997e-09	1.6123	1	0.526	0.000223015	9311	LOC_Os02g08180
9.38868e-09	1.62715	0.944	0.053	0.000243186	9311	LOC_Os02g51500
1.02843e-08	2.19231	0.917	0	0.000266385	9311	LOC_Os04g42064
1.02843e-08	1.73742	0.917	0	0.000266385	9311	LOC_Os01g58048
2.05085e-08	1.95365	0.972	0.684	0.00053121	9311	LOC_Os07g12200
2.41285e-08	2.36803	0.889	0	0.000624977	9311	LOC_Os03g64264
4.0667e-08	1.62791	0.972	0.842	0.00105336	9311	LOC_Os02g35610
5.50849e-08	2.60547	0.861	0	0.00142681	9311	LOC_Os05g02310
5.50849e-08	2.43601	0.861	0	0.00142681	9311	LOC_Os01g09214
5.50849e-08	2.22906	0.861	0	0.00142681	9311	LOC_Os02g52150
1.22463e-07	2.27621	0.833	0	0.00317205	9311	LOC_Os01g54734
1.22463e-07	2.12503	0.833	0	0.00317205	9311	LOC_Os05g10656
1.22463e-07	1.75881	0.833	0	0.00317205	9311	LOC_Os04g37778
1.22463e-07	1.71419	0.833	0	0.00317205	9311	LOC_Os05g01799
1.22463e-07	1.49123	0.833	0	0.00317205	9311	LOC_Os07g42390
1.22463e-07	1.13928	0.833	0	0.00317205	9311	LOC_Os10g29559
1.3633e-07	2.70049	0.889	0.263	0.00353122	9311	LOC_Os01g22010
1.99505e-07	2.1138	0.861	0.158	0.00516759	9311	LOC_Os01g70470
2.65327e-07	1.31269	0.806	0	0.00687251	9311	LOC_Os11g10045
5.60646e-07	2.47254	0.778	0	0.0145219	9311	LOC_Os08g24200
5.60646e-07	1.9638	0.778	0	0.0145219	9311	LOC_Os11g19871
6.08203e-07	2.51259	0.861	0.211	0.0157537	9311	LOC_Os06g05510
1.15627e-06	1.71882	0.75	0	0.0299497	9311	LOC_Os02g08330
1.15627e-06	1.20039	0.75	0	0.0299497	9311	EVM035660
1.25663e-06	1.4603	0.917	0.632	0.0325492	9311	LOC_Os05g03760
1.37429e-06	1.47149	0.861	0.316	0.0355969	9311	LOC_Os01g57260
1.50659e-06	1.05311	0.944	0.737	0.0390237	9311	LOC_Os11g02200
1.59447e-06	2.07401	0.833	0.316	0.0413	9311	LOC_Os01g28790
1.93962e-06	1.15191	0.944	0.684	0.0502401	9311	LOC_Os08g37444
1.955e-06	1.49128	0.889	0.368	0.0506385	9311	LOC_Os11g41875
2.02838e-06	1.89172	0.778	0.105	0.0525391	9311	LOC_Os11g47330
2.09121e-06	2.12477	0.972	0.842	0.0541664	9311	LOC_Os04g52504
2.13273e-06	1.20622	0.75	0.053	0.0552421	9311	LOC_Os04g50216
2.32929e-06	1.54914	0.722	0	0.0603332	9311	LOC_Os01g05949
2.32929e-06	1.48063	0.722	0	0.0603332	9311	LOC_Os10g04020
2.32929e-06	1.28378	0.722	0	0.0603332	9311	LOC_Os05g12481
2.32929e-06	1.18039	0.722	0	0.0603332	9311	LOC_Os02g34729
2.59974e-06	1.09612	0.944	0.895	0.0673386	9311	LOC_Os01g46926
2.9109e-06	1.56781	0.889	0.526	0.0753981	9311	LOC_Os08g37370
3.77215e-06	1.79985	0.917	0.474	0.0977061	9311	LOC_Os06g46950
4.58681e-06	1.33643	0.694	0	0.118807	9311	LOC_Os08g13294
8.52718e-06	1.3902	0.917	0.579	0.220871	9311	LOC_Os01g43420
8.83588e-06	1.56382	0.667	0	0.228867	9311	EVM024455
8.83588e-06	1.28933	0.667	0	0.228867	9311	LOC_Os09g17574
9.19073e-06	1.55948	0.75	0.105	0.238058	9311	LOC_Os01g57570
1.09839e-05	1.01488	0.694	0.053	0.284505	9311	LOC_Os09g36100
1.17434e-05	1.1429	0.722	0.105	0.304176	9311	LOC_Os02g48190
1.28497e-05	1.75929	0.889	0.632	0.332832	9311	LOC_Os01g72530
1.50559e-05	1.12961	0.889	0.474	0.389977	9311	LOC_Os08g44340
1.66635e-05	1.6976	0.639	0	0.431619	9311	LOC_Os03g58464
1.66635e-05	0.996996	0.639	0	0.431619	9311	LOC_Os03g22270
1.84284e-05	1.13104	0.667	0.053	0.477333	9311	LOC_Os02g10070
2.06659e-05	0.985639	1	0.789	0.535289	9311	LOC_Os02g55430
3.07883e-05	1.424	0.611	0	0.797479	9311	LOC_Os03g25164
3.07883e-05	1.18481	0.611	0	0.797479	9311	LOC_Os09g30412
3.07883e-05	1.1102	0.611	0	0.797479	9311	LOC_Os10g39406
3.07883e-05	1.09448	0.611	0	0.797479	9311	LOC_Os11g06340
3.07883e-05	1.01841	0.611	0	0.797479	9311	LOC_Os07g31300
3.15682e-05	1.80893	0.778	0.263	0.817679	9311	LOC_Os01g58310
3.7212e-05	1.41816	0.889	0.737	0.963864	9311	LOC_Os04g30420
3.76167e-05	1.42311	0.861	0.474	0.974347	9311	LOC_Os02g36530
3.82411e-05	1.50306	0.806	0.316	0.99052	9311	LOC_Os03g52410
3.99309e-05	1.04134	0.722	0.158	1	9311	LOC_Os12g06870
4.13919e-05	1.21592	0.694	0.158	1	9311	LOC_Os06g21550
5.21506e-05	0.511781	1	1	1	9311	LOC_Os07g02340
5.57736e-05	1.49197	0.583	0	1	9311	LOC_Os12g08160
5.57736e-05	1.24864	0.583	0	1	9311	LOC_Os10g26834
5.57736e-05	1.23842	0.583	0	1	9311	EVM029068
5.57736e-05	1.19656	0.583	0	1	9311	LOC_Os03g08050
5.57736e-05	1.13901	0.583	0	1	9311	LOC_Os01g40189
5.57736e-05	0.911424	0.583	0	1	9311	LOC_Os12g34045
5.57736e-05	0.88685	0.583	0	1	9311	LOC_Os02g56560
5.57736e-05	0.79882	0.583	0	1	9311	LOC_Os04g46820
8.145e-05	0.953855	0.611	0.053	1	9311	LOC_Os02g09470
8.145e-05	0.909378	0.611	0.053	1	9311	LOC_Os12g04020
9.91319e-05	0.887643	0.556	0	1	9311	LOC_Os08g20594
0.000155642	1.13781	0.806	0.474	1	9311	LOC_Os01g52214
0.000168911	0.829268	1	0.842	1	9311	LOC_Os04g58890
0.000173005	1.37858	0.528	0	1	9311	LOC_Os01g24280
0.000173005	1.27661	0.528	0	1	9311	LOC_Os04g49249
0.000173005	1.14563	0.528	0	1	9311	LOC_Os04g28250
0.000173005	1.10533	0.528	0	1	9311	LOC_Os03g06710
0.000173005	0.929181	0.528	0	1	9311	LOC_Os09g07615
0.000173005	0.912868	0.528	0	1	9311	LOC_Os12g34389
0.000173005	0.911995	0.528	0	1	9311	LOC_Os11g25260
0.000173005	0.911642	0.528	0	1	9311	LOC_Os07g23696
0.000173005	0.765114	0.528	0	1	9311	LOC_Os06g39902
0.000198339	1.01851	0.611	0.105	1	9311	LOC_Os03g18400
0.000207789	1.34966	0.694	0.263	1	9311	LOC_Os03g18600
0.000237277	0.796937	0.556	0.053	1	9311	LOC_Os01g07760
0.000242636	1.23761	0.75	0.368	1	9311	LOC_Os04g58110
0.000271378	1.0733	0.694	0.316	1	9311	LOC_Os05g01600
0.000296674	1.58699	0.5	0	1	9311	EVM018052
0.000296674	1.26947	0.5	0	1	9311	LOC_Os02g43644
0.000296674	1.09506	0.5	0	1	9311	LOC_Os02g12521
0.000296674	1.04379	0.5	0	1	9311	LOC_Os11g10510
0.000296674	0.71844	0.5	0	1	9311	LOC_Os03g42464
0.000327913	0.97931	0.639	0.158	1	9311	LOC_Os01g65900
0.000330358	1.05691	0.639	0.211	1	9311	LOC_Os03g37090
0.000342556	0.910975	0.861	0.842	1	9311	LOC_Os01g58220
0.000356819	1.0552	0.917	0.789	1	9311	LOC_Os05g24550
0.000368379	1.0496	0.667	0.158	1	9311	LOC_Os09g34020
0.000407434	0.754806	0.583	0.105	1	9311	LOC_Os02g47580
0.000419603	0.917293	0.861	0.684	1	9311	LOC_Os01g52890
0.000429156	0.797072	0.833	0.474	1	9311	LOC_Os05g27930
0.000500256	1.34409	0.472	0	1	9311	LOC_Os12g36229
0.000500256	1.19324	0.472	0	1	9311	LOC_Os12g38689
0.000500256	0.750745	0.472	0	1	9311	LOC_Os06g33904
0.000500256	0.6715	0.472	0	1	9311	LOC_Os01g01704
0.000521297	0.914745	0.722	0.421	1	9311	LOC_Os01g46610
0.000581996	1.13742	0.639	0.263	1	9311	LOC_Os05g05020
0.000595129	1.35258	0.972	0.947	1	9311	LOC_Os11g41150
0.000606287	0.747293	0.667	0.158	1	9311	LOC_Os09g13920
0.000653001	1.01599	0.583	0.158	1	9311	LOC_Os06g04889
0.000673139	0.735101	0.639	0.211	1	9311	LOC_Os03g38970
0.0006746	0.730867	0.528	0.053	1	9311	LOC_Os03g57900
0.000711073	1.0553	0.861	0.684	1	9311	LOC_Os01g04010
0.000729391	1.15077	0.778	0.474	1	9311	LOC_Os01g50104
0.000740057	1.08347	0.611	0.158	1	9311	LOC_Os01g64790
0.000790891	0.781963	0.75	0.421	1	9311	LOC_Os08g16559
0.000812086	1.05159	0.5	0.053	1	9311	LOC_Os05g11250
0.000830067	1.09937	0.444	0	1	9311	LOC_Os07g48754
0.000830067	0.943304	0.444	0	1	9311	LOC_Os01g42016
0.000830067	0.938368	0.444	0	1	9311	LOC_Os01g64644
0.000830067	0.9128	0.444	0	1	9311	LOC_Os06g37139
0.000830067	0.798166	0.444	0	1	9311	LOC_Os03g63539
0.000830067	0.686337	0.444	0	1	9311	LOC_Os11g23824
0.000830067	0.62454	0.444	0	1	9311	LOC_Os03g46219
0.0008695	1.14858	0.917	0.842	1	9311	LOC_Os06g21410
0.000906073	0.867475	0.833	0.684	1	9311	LOC_Os05g42424
0.000909928	1.10372	0.833	0.526	1	9311	LOC_Os01g26664
0.000911586	0.723626	0.972	1	1	9311	LOC_Os06g46770
0.000950398	1.19334	0.639	0.158	1	9311	LOC_Os05g45450
0.000991629	0.910117	0.75	0.316	1	9311	LOC_Os02g37180
0.00100029	0.83115	0.889	0.737	1	9311	LOC_Os03g12820
0.00100831	0.92948	0.778	0.474	1	9311	LOC_Os02g38050
0.00100876	0.891887	0.556	0.105	1	9311	LOC_Os05g41380
0.00109	1.07472	0.889	1	1	9311	LOC_Os11g10470
0.00116087	0.673558	0.639	0.211	1	9311	LOC_Os06g43210
0.00117648	0.758089	0.667	0.316	1	9311	LOC_Os12g25210
0.00123672	0.666496	0.944	1	1	9311	LOC_Os05g03860
0.00124181	1.23422	0.556	0.158	1	9311	LOC_Os07g44250
0.0013045	0.635786	0.472	0.053	1	9311	LOC_Os11g42790
0.00133036	0.706143	0.556	0.158	1	9311	LOC_Os02g56250
0.00134141	0.85271	0.778	0.526	1	9311	LOC_Os07g37400
0.00135632	1.14129	0.417	0	1	9311	LOC_Os04g52464
0.00135632	0.744423	0.417	0	1	9311	LOC_Os02g58324
0.00135632	0.655404	0.417	0	1	9311	LOC_Os04g39994
0.00135632	0.60106	0.417	0	1	9311	LOC_Os02g46424
0.00135632	0.584506	0.417	0	1	9311	EVM021700
0.00135632	0.568902	0.417	0	1	9311	LOC_Os01g46709
0.00137843	0.718838	1	1	1	9311	LOC_Os06g46970
0.00139167	1.38728	0.75	0.368	1	9311	LOC_Os07g41340
0.0014043	0.695918	0.472	0.053	1	9311	LOC_Os05g50810
0.0014234	1.16843	0.611	0.211	1	9311	LOC_Os04g45590
0.00142372	0.825946	0.833	0.737	1	9311	LOC_Os03g60090
0.0014247	1.01088	0.556	0.158	1	9311	LOC_Os01g42380
0.00149327	0.833947	0.639	0.263	1	9311	LOC_Os02g39400
0.00156361	1.03039	0.861	0.895	1	9311	LOC_Os09g21710
0.00157962	1.42309	0.944	0.947	1	9311	LOC_Os11g04409
0.00158199	1.142	0.528	0.105	1	9311	LOC_Os01g55320
0.00167665	1.46438	0.861	0.737	1	9311	LOC_Os06g13190
0.0017282	0.768616	0.889	0.684	1	9311	LOC_Os06g45060
0.00174745	1.29837	0.472	0.053	1	9311	LOC_Os03g17870
0.00174745	0.705527	0.472	0.053	1	9311	LOC_Os10g40390
0.00174745	0.618938	0.472	0.053	1	9311	LOC_Os05g28480
0.00184306	0.73035	0.667	0.368	1	9311	LOC_Os09g26900
0.00193133	0.696838	0.639	0.263	1	9311	LOC_Os04g52500
0.0020184	0.879239	0.806	0.632	1	9311	LOC_Os04g42090
0.00211193	0.940517	0.861	0.895	1	9311	LOC_Os03g21380
0.00218403	1.96991	0.389	0	1	9311	LOC_Os03g02771
0.00218403	0.987711	0.389	0	1	9311	LOC_Os01g04290
0.00218403	0.885745	0.389	0	1	9311	LOC_Os01g48714
0.00218403	0.724798	0.389	0	1	9311	LOC_Os05g08356
0.00218403	0.68325	0.389	0	1	9311	LOC_Os06g05464
0.00218403	0.669087	0.389	0	1	9311	LOC_Os06g50818
0.00218403	0.579611	0.389	0	1	9311	LOC_Os06g21470
0.00218403	0.499718	0.389	0	1	9311	LOC_Os08g03584
0.00233312	0.637595	1	1	1	9311	LOC_Os09g07920
0.00233418	1.11963	0.611	0.316	1	9311	LOC_Os07g42220
0.00234623	0.78123	0.667	0.421	1	9311	LOC_Os05g41590
0.00243114	1.03092	0.639	0.316	1	9311	LOC_Os01g04330
0.002446	0.813592	0.5	0.105	1	9311	LOC_Os06g07580
0.00258881	0.91499	0.694	0.316	1	9311	LOC_Os01g57730
0.002682	0.670346	0.889	0.895	1	9311	LOC_Os03g08330
0.00271508	0.744175	0.611	0.211	1	9311	LOC_Os09g20090
0.00276107	0.739928	0.972	0.737	1	9311	LOC_Os03g59210
0.00280021	0.549256	0.5	0.105	1	9311	LOC_Os08g43480
0.00281409	0.78916	0.694	0.368	1	9311	LOC_Os03g07430
0.00304992	0.800805	0.472	0.105	1	9311	LOC_Os08g44820
0.00310957	0.653459	0.528	0.105	1	9311	LOC_Os05g04000
0.00317974	0.656166	0.611	0.316	1	9311	LOC_Os07g07240
0.0032007	0.619973	0.5	0.105	1	9311	LOC_Os11g41140
0.00326313	0.652304	0.472	0.105	1	9311	LOC_Os02g46660
0.00326313	0.624767	0.472	0.105	1	9311	LOC_Os04g42480
0.00346846	1.19054	0.361	0	1	9311	LOC_Os08g39300
0.00346846	0.999182	0.361	0	1	9311	LOC_Os01g62744
0.00346846	0.988259	0.361	0	1	9311	LOC_Os04g49660
0.00346846	0.978082	0.361	0	1	9311	LOC_Os03g47059
0.00346846	0.954984	0.361	0	1	9311	LOC_Os04g05650
0.00346846	0.7794	0.361	0	1	9311	LOC_Os01g56300
0.00346846	0.69631	0.361	0	1	9311	LOC_Os01g64630
0.00346846	0.651277	0.361	0	1	9311	EVM036215
0.00346846	0.609847	0.361	0	1	9311	LOC_Os01g14860
0.00346846	0.594736	0.361	0	1	9311	LOC_Os05g43994
0.00346846	0.553429	0.361	0	1	9311	LOC_Os04g35590
0.00346846	0.549363	0.361	0	1	9311	LOC_Os05g11428
0.00346846	0.539519	0.361	0	1	9311	LOC_Os03g25610
0.00346846	0.52595	0.361	0	1	9311	LOC_Os01g67824
0.00346846	0.508502	0.361	0	1	9311	LOC_Os05g11005
0.00346846	0.492359	0.361	0	1	9311	LOC_Os03g50969
0.00346846	0.482972	0.361	0	1	9311	EVM030255
0.00346846	0.481499	0.361	0	1	9311	LOC_Os03g29350
0.00346846	0.432234	0.361	0	1	9311	LOC_Os06g41940
0.00352434	0.986861	0.667	0.474	1	9311	LOC_Os06g39912
0.0035785	0.495425	0.833	0.632	1	9311	LOC_Os03g59710
0.00361512	0.596485	0.972	1	1	9311	LOC_Os06g04030
0.00391641	1.04543	0.833	0.789	1	9311	LOC_Os02g19770
0.00398632	1.20292	0.417	0.053	1	9311	LOC_Os01g06230
0.00406105	0.560916	0.889	0.579	1	9311	LOC_Os06g41770
0.0041737	0.734369	0.917	0.684	1	9311	LOC_Os02g52170
0.00419186	0.502271	0.639	0.316	1	9311	LOC_Os03g17000
0.00431638	1.44802	0.639	0.368	1	9311	LOC_Os12g02080
0.0045809	0.491754	0.417	0.053	1	9311	LOC_Os02g38840
0.00475513	0.647177	0.944	1	1	9311	LOC_Os01g36950
0.00490735	0.779494	0.417	0.053	1	9311	LOC_Os05g44340
0.00500524	0.783618	0.583	0.263	1	9311	LOC_Os08g15230
0.00537414	0.926662	0.722	0.579	1	9311	LOC_Os03g60080
0.00543675	0.859894	0.333	0	1	9311	LOC_Os07g49116
0.00543675	0.705583	0.333	0	1	9311	LOC_Os08g10504
0.00543675	0.696231	0.333	0	1	9311	LOC_Os10g13842
0.00543675	0.685079	0.333	0	1	9311	LOC_Os09g08910
0.00543675	0.657891	0.333	0	1	9311	LOC_Os04g52750
0.00543675	0.647054	0.333	0	1	9311	LOC_Os02g30600
0.00543675	0.633689	0.333	0	1	9311	LOC_Os02g53320
0.00543675	0.590995	0.333	0	1	9311	LOC_Os04g32043
0.00543675	0.583233	0.333	0	1	9311	LOC_Os04g40874
0.00543675	0.514778	0.333	0	1	9311	LOC_Os12g34012
0.00543675	0.497658	0.333	0	1	9311	EVM035742
0.00543675	0.488885	0.333	0	1	9311	LOC_Os06g08005
0.00543675	0.449641	0.333	0	1	9311	LOC_Os11g01510
0.00543675	0.409368	0.333	0	1	9311	LOC_Os05g05229
0.00571107	0.625379	0.611	0.263	1	9311	LOC_Os06g49780
0.00572908	0.488816	0.5	0.105	1	9311	LOC_Os05g10940
0.0057331	0.641817	0.778	0.632	1	9311	LOC_Os10g42710
0.00577271	1.01579	0.611	0.368	1	9311	LOC_Os03g19070
0.00588675	0.768508	0.472	0.105	1	9311	LOC_Os02g53110
0.00588721	1.22744	0.694	0.316	1	9311	LOC_Os09g36790
0.00603557	0.875526	0.583	0.211	1	9311	LOC_Os02g41510
0.00609726	0.701108	0.694	0.263	1	9311	LOC_Os09g14700
0.00609789	1.06205	0.611	0.316	1	9311	LOC_Os01g67190
0.0061202	0.779276	0.389	0.053	1	9311	LOC_Os11g30290
0.00622653	1.17191	0.861	1	1	9311	LOC_Os12g02040
0.00640088	0.530215	0.583	0.211	1	9311	LOC_Os03g58764
0.00652136	1.57471	0.722	0.526	1	9311	LOC_Os02g53410
0.00670999	0.783035	0.583	0.263	1	9311	LOC_Os05g02770
0.00681642	0.575596	0.444	0.105	1	9311	LOC_Os08g33720
0.00686027	0.703402	0.5	0.158	1	9311	LOC_Os09g20650
0.00717903	0.84397	0.5	0.211	1	9311	LOC_Os06g43090
0.00722243	0.755857	0.694	0.474	1	9311	LOC_Os09g25760
0.00726468	0.724223	0.444	0.105	1	9311	LOC_Os12g32190
0.00767076	1.16238	0.528	0.211	1	9311	LOC_Os03g32230
0.00773922	0.593193	0.444	0.105	1	9311	LOC_Os04g49620
0.00799359	0.799909	0.611	0.474	1	9311	LOC_Os09g38750
0.00804585	0.6423	0.833	0.895	1	9311	LOC_Os08g45070
0.0081191	0.64031	0.889	0.947	1	9311	LOC_Os06g04240
0.00813747	0.408102	0.944	0.947	1	9311	LOC_Os05g27730
0.00824134	0.579328	0.444	0.105	1	9311	LOC_Os06g12390
0.00835199	0.861673	0.75	0.684	1	9311	LOC_Os05g41550
0.00841839	1.03828	0.306	0	1	9311	LOC_Os06g05034
0.00841839	0.681569	0.306	0	1	9311	LOC_Os04g37769
0.00841839	0.602171	0.306	0	1	9311	LOC_Os03g54621
0.00841839	0.584977	0.306	0	1	9311	LOC_Os12g27440
0.00841839	0.580774	0.306	0	1	9311	LOC_Os02g04199
0.00841839	0.561309	0.306	0	1	9311	LOC_Os01g27340
0.00841839	0.539862	0.306	0	1	9311	LOC_Os02g51420
0.00841839	0.521927	0.306	0	1	9311	LOC_Os08g05964
0.00841839	0.516933	0.306	0	1	9311	LOC_Os03g53845
0.00841839	0.513855	0.306	0	1	9311	LOC_Os05g38470
0.00841839	0.49275	0.306	0	1	9311	LOC_Os12g15884
0.00841839	0.471582	0.306	0	1	9311	LOC_Os02g32469
0.00841839	0.470444	0.306	0	1	9311	LOC_Os03g09049
0.00841839	0.444656	0.306	0	1	9311	EVM019481
0.00841839	0.443618	0.306	0	1	9311	LOC_Os02g52960
0.00841839	0.441906	0.306	0	1	9311	LOC_Os04g17664
0.00841839	0.441556	0.306	0	1	9311	LOC_Os03g05812
0.00841839	0.439028	0.306	0	1	9311	LOC_Os01g57119
0.00841839	0.432261	0.306	0	1	9311	LOC_Os10g34270
0.00841839	0.430646	0.306	0	1	9311	LOC_Os01g51280
0.00841839	0.428016	0.306	0	1	9311	LOC_Os01g73011
0.00841839	0.423409	0.306	0	1	9311	LOC_Os10g24006
0.00841839	0.42286	0.306	0	1	9311	LOC_Os10g20240
0.00841839	0.413575	0.306	0	1	9311	LOC_Os05g04340
0.00841839	0.411043	0.306	0	1	9311	LOC_Os07g17834
0.00841839	0.39591	0.306	0	1	9311	LOC_Os08g44370
0.00841839	0.376561	0.306	0	1	9311	LOC_Os02g05329
0.00847801	0.653467	0.778	0.684	1	9311	LOC_Os01g56930
0.00878904	1.54848	0.556	0.263	1	9311	LOC_Os08g39290
0.00889616	0.792987	0.694	0.421	1	9311	LOC_Os05g02760
0.00978142	0.552346	0.583	0.316	1	9311	LOC_Os03g47500
0.00989631	2.02807	0.694	0.421	1	9311	LOC_Os06g11310
0.009902	1.03326	0.889	0.789	1	9311	LOC_Os01g03130
0.00992646	1.00189	0.361	0.053	1	9311	LOC_Os04g51940
0.00992646	0.792624	0.361	0.053	1	9311	LOC_Os01g12090
0.00993684	0.524175	0.472	0.158	1	9311	LOC_Os03g60130
1.04086e-12	4.56972	1	0	2.69604e-08	Nip	LOC_Os02g48714
1.04086e-12	3.66013	1	0	2.69604e-08	Nip	EVM0012725
1.04086e-12	2.55859	1	0	2.69604e-08	Nip	LOC_Os01g54739
1.04086e-12	2.4242	1	0	2.69604e-08	Nip	LOC_Os11g10520
1.04086e-12	2.33205	1	0	2.69604e-08	Nip	LOC_Os06g05010
1.04086e-12	1.9863	1	0	2.69604e-08	Nip	LOC_Os03g08024
1.04086e-12	1.93258	1	0	2.69604e-08	Nip	LOC_Os09g29270
1.04086e-12	1.82328	1	0	2.69604e-08	Nip	LOC_Os03g54980
1.04086e-12	1.7717	1	0	2.69604e-08	Nip	EVM0044414
6.64886e-12	3.45816	0.947	0	1.72219e-07	Nip	LOC_Os02g11859
6.64886e-12	3.03715	0.947	0	1.72219e-07	Nip	LOC_Os06g05020
6.64886e-12	2.23462	0.947	0	1.72219e-07	Nip	LOC_Os01g60410
6.64886e-12	1.753	0.947	0	1.72219e-07	Nip	LOC_Os04g17084
6.64886e-12	1.50062	0.947	0	1.72219e-07	Nip	LOC_Os07g28644
6.64886e-12	1.33611	0.947	0	1.72219e-07	Nip	LOC_Os05g43252
3.00957e-11	2.21254	1	0.083	7.79538e-07	Nip	LOC_Os12g25690
3.25178e-11	1.77808	0.947	0.028	8.42277e-07	Nip	LOC_Os03g15270
3.47739e-11	1.40298	0.947	0.056	9.00714e-07	Nip	LOC_Os07g08410
3.98783e-11	1.96317	0.895	0	1.03293e-06	Nip	LOC_Os03g60760
3.98783e-11	1.55943	0.895	0	1.03293e-06	Nip	LOC_Os06g30924
3.98783e-11	1.49798	0.895	0	1.03293e-06	Nip	LOC_Os05g02240
3.98783e-11	1.44346	0.895	0	1.03293e-06	Nip	Add_EVM0009533
3.98783e-11	1.39643	0.895	0	1.03293e-06	Nip	LOC_Os06g33919
3.98783e-11	1.34961	0.895	0	1.03293e-06	Nip	LOC_Os12g35590
4.961e-11	2.13992	0.947	0.028	1.285e-06	Nip	LOC_Os05g03960
6.04697e-11	1.99442	1	0.194	1.56629e-06	Nip	LOC_Os02g50600
1.29616e-10	2.48697	1	0.194	3.3573e-06	Nip	LOC_Os05g27780
1.30807e-10	2.36795	0.947	0.111	3.38815e-06	Nip	LOC_Os10g36703
1.79079e-10	1.75919	0.947	0.056	4.63851e-06	Nip	LOC_Os04g43760
2.25101e-10	2.19297	0.842	0	5.83056e-06	Nip	LOC_Os02g37290
2.25101e-10	1.81187	0.842	0	5.83056e-06	Nip	LOC_Os10g38501
2.25101e-10	1.46675	0.842	0	5.83056e-06	Nip	LOC_Os01g05959
2.25101e-10	1.32367	0.842	0	5.83056e-06	Nip	LOC_Os03g21040
2.25101e-10	1.10001	0.842	0	5.83056e-06	Nip	LOC_Os01g01700
2.55366e-10	2.20622	1	0.25	6.61449e-06	Nip	LOC_Os05g45020
3.4253e-10	1.71503	1	0.222	8.87221e-06	Nip	LOC_Os08g37320
6.15647e-10	1.52331	0.947	0.111	1.59465e-05	Nip	LOC_Os02g13980
8.02696e-10	1.03932	0.895	0.056	2.07914e-05	Nip	LOC_Os12g10560
9.46935e-10	1.81749	0.842	0.028	2.45275e-05	Nip	LOC_Os06g11290
1.00224e-09	1.35592	1	0.972	2.59601e-05	Nip	LOC_Os01g55830
1.19859e-09	1.70667	0.789	0	3.10459e-05	Nip	LOC_Os03g02775
1.19859e-09	1.6793	0.789	0	3.10459e-05	Nip	LOC_Os06g09900
1.19859e-09	1.40866	0.789	0	3.10459e-05	Nip	LOC_Os04g37774
1.19859e-09	1.21745	0.789	0	3.10459e-05	Nip	LOC_Os08g13280
1.19859e-09	1.0794	0.789	0	3.10459e-05	Nip	LOC_Os10g28254
1.19859e-09	1.06601	0.789	0	3.10459e-05	Nip	LOC_Os12g13674
1.19859e-09	0.992818	0.789	0	3.10459e-05	Nip	LOC_Os05g10414
1.19859e-09	0.880413	0.789	0	3.10459e-05	Nip	LOC_Os12g42884
1.39716e-09	1.62715	1	0.417	3.61892e-05	Nip	LOC_Os03g22810
1.46379e-09	1.85392	1	0.833	3.7915e-05	Nip	LOC_Os02g07910
2.95481e-09	1.41441	1	0.611	7.65355e-05	Nip	LOC_Os03g48110
3.41388e-09	1.40042	1	0.194	8.84263e-05	Nip	LOC_Os01g57450
3.56177e-09	1.743	0.947	0.333	9.2257e-05	Nip	LOC_Os06g38210
4.7568e-09	2.20423	1	0.417	0.000123211	Nip	LOC_Os01g16030
5.35632e-09	1.25134	0.789	0.028	0.000138739	Nip	LOC_Os05g49880
6.03413e-09	1.40218	0.737	0	0.000156296	Nip	LOC_Os10g38495
6.03413e-09	1.34167	0.737	0	0.000156296	Nip	LOC_Os01g52594
6.03413e-09	1.26723	0.737	0	0.000156296	Nip	LOC_Os09g30418
6.03413e-09	1.13811	0.737	0	0.000156296	Nip	LOC_Os11g47574
6.03413e-09	1.09439	0.737	0	0.000156296	Nip	LOC_Os05g10650
6.03413e-09	1.09394	0.737	0	0.000156296	Nip	LOC_Os05g47446
6.03413e-09	0.985933	0.737	0	0.000156296	Nip	LOC_Os04g11980
9.64787e-09	1.53968	0.947	0.25	0.000249899	Nip	LOC_Os08g34150
1.01637e-08	1.72384	0.947	0.444	0.000263261	Nip	LOC_Os06g10890
1.02514e-08	1.63973	1	0.361	0.000265532	Nip	LOC_Os04g50970
1.07684e-08	0.989615	0.789	0.056	0.000278922	Nip	LOC_Os01g64970
1.67062e-08	1.6222	1	0.306	0.000432724	Nip	LOC_Os03g55540
2.8787e-08	1.81647	0.684	0	0.00074564	Nip	LOC_Os11g11980
2.8787e-08	1.7665	0.684	0	0.00074564	Nip	LOC_Os03g13140
2.8787e-08	1.03023	0.684	0	0.00074564	Nip	LOC_Os10g42299
2.8787e-08	1.00229	0.684	0	0.00074564	Nip	LOC_Os02g38340
2.8787e-08	0.881483	0.684	0	0.00074564	Nip	LOC_Os12g28015
2.8787e-08	0.83049	0.684	0	0.00074564	Nip	LOC_Os02g10370
2.8787e-08	0.658086	0.684	0	0.00074564	Nip	LOC_Os06g16270
4.27413e-08	1.82817	0.895	0.194	0.00110709	Nip	LOC_Os05g48900
4.55507e-08	1.46808	0.842	0.139	0.00117985	Nip	LOC_Os08g19670
9.06189e-08	1.256	1	0.778	0.00234721	Nip	LOC_Os12g42876
9.44497e-08	0.879899	0.789	0.083	0.00244644	Nip	LOC_Os09g25314
9.81074e-08	0.915965	0.684	0.028	0.00254118	Nip	LOC_Os06g04130
1.11513e-07	1.04226	0.842	0.167	0.00288841	Nip	LOC_Os07g12150
1.30439e-07	2.0974	0.632	0	0.00337863	Nip	LOC_Os10g40520
1.30439e-07	1.12646	0.632	0	0.00337863	Nip	LOC_Os09g15044
1.30439e-07	0.945619	0.632	0	0.00337863	Nip	LOC_Os12g02589
1.30439e-07	0.922557	0.632	0	0.00337863	Nip	LOC_Os01g32080
1.30439e-07	0.778671	0.632	0	0.00337863	Nip	Add_EVM0015885
1.30439e-07	0.692158	0.632	0	0.00337863	Nip	LOC_Os03g59740
1.30439e-07	0.61322	0.632	0	0.00337863	Nip	LOC_Os09g27744
1.30439e-07	0.582795	0.632	0	0.00337863	Nip	LOC_Os04g32330
1.51825e-07	1.211	0.947	0.417	0.00393258	Nip	LOC_Os01g59900
1.60576e-07	0.876534	0.737	0.056	0.00415924	Nip	LOC_Os01g68060
1.80926e-07	0.893074	0.737	0.056	0.00468635	Nip	LOC_Os01g38480
2.04621e-07	0.717058	0.842	0.083	0.00530009	Nip	LOC_Os03g18870
2.428e-07	1.77093	0.895	0.25	0.00628901	Nip	LOC_Os05g25850
3.26767e-07	0.882557	1	0.889	0.00846392	Nip	LOC_Os06g07969
4.68922e-07	1.67575	0.789	0.111	0.012146	Nip	LOC_Os06g05000
4.71025e-07	0.909254	0.632	0.028	0.0122005	Nip	LOC_Os05g34500
4.71025e-07	0.893751	0.632	0.028	0.0122005	Nip	LOC_Os01g52500
5.62668e-07	1.19444	0.579	0	0.0145742	Nip	LOC_Os11g45890
5.62668e-07	1.13225	0.579	0	0.0145742	Nip	LOC_Os11g42500
5.62668e-07	0.988553	0.579	0	0.0145742	Nip	LOC_Os09g10274
5.62668e-07	0.912528	0.579	0	0.0145742	Nip	LOC_Os01g73630
5.62668e-07	0.84137	0.579	0	0.0145742	Nip	LOC_Os08g10500
5.62668e-07	0.836608	0.579	0	0.0145742	Nip	LOC_Os03g18770
5.62668e-07	0.74215	0.579	0	0.0145742	Nip	LOC_Os03g32499
5.62668e-07	0.714929	0.579	0	0.0145742	Nip	LOC_Os06g49490
5.62668e-07	0.704316	0.579	0	0.0145742	Nip	LOC_Os04g23140
5.62668e-07	0.693362	0.579	0	0.0145742	Nip	LOC_Os11g14544
5.62668e-07	0.688851	0.579	0	0.0145742	Nip	LOC_Os03g20790
5.62668e-07	0.636044	0.579	0	0.0145742	Nip	LOC_Os03g10700
5.62668e-07	0.636035	0.579	0	0.0145742	Nip	LOC_Os01g50934
5.79769e-07	1.36469	0.947	0.611	0.0150172	Nip	LOC_Os08g34800
5.80902e-07	0.7288	0.684	0.056	0.0150465	Nip	LOC_Os05g10930
6.17614e-07	1.25976	0.947	0.556	0.0159974	Nip	LOC_Os02g38980
7.33275e-07	1.07513	0.684	0.056	0.0189933	Nip	LOC_Os04g32840
9.82176e-07	0.739181	0.632	0.028	0.0254403	Nip	LOC_Os12g37870
1.10803e-06	1.45032	0.632	0.028	0.0287001	Nip	LOC_Os10g38360
1.14499e-06	0.732869	0.684	0.083	0.0296575	Nip	LOC_Os10g41520
1.16153e-06	0.833699	0.684	0.056	0.030086	Nip	LOC_Os02g57840
1.59292e-06	1.02194	0.842	0.194	0.0412598	Nip	LOC_Os01g07250
1.868e-06	1.4144	0.789	0.194	0.048385	Nip	LOC_Os02g55600
1.94252e-06	1.19125	1	0.667	0.0503151	Nip	LOC_Os03g53190
2.06238e-06	0.905019	0.895	0.222	0.0534197	Nip	LOC_Os05g09490
2.10678e-06	0.853743	0.737	0.111	0.0545699	Nip	LOC_Os06g12690
2.14369e-06	0.731002	0.579	0.028	0.055526	Nip	LOC_Os05g06700
2.21719e-06	0.79829	0.684	0.083	0.0574296	Nip	LOC_Os01g01369
2.22645e-06	1.2758	0.947	0.361	0.0576696	Nip	LOC_Os07g49114
2.3161e-06	1.22483	0.526	0	0.0599916	Nip	LOC_Os03g16030
2.3161e-06	0.801109	0.526	0	0.0599916	Nip	LOC_Os12g03800
2.3161e-06	0.645011	0.526	0	0.0599916	Nip	LOC_Os05g27340
2.3161e-06	0.638378	0.526	0	0.0599916	Nip	LOC_Os03g25050
2.3161e-06	0.55987	0.526	0	0.0599916	Nip	LOC_Os09g20579
2.3161e-06	0.528378	0.526	0	0.0599916	Nip	LOC_Os07g08934
2.3161e-06	0.44224	0.526	0	0.0599916	Nip	LOC_Os05g32474
3.19655e-06	1.04674	0.947	0.361	0.082797	Nip	LOC_Os02g57854
3.73629e-06	1.0644	0.895	0.278	0.0967773	Nip	LOC_Os04g32820
4.19031e-06	1.11223	0.842	0.194	0.108537	Nip	LOC_Os06g04990
4.27085e-06	0.997936	1	0.806	0.110623	Nip	LOC_Os05g33380
4.38123e-06	0.920329	0.579	0.028	0.113483	Nip	LOC_Os10g20510
4.82247e-06	1.28332	0.684	0.111	0.124912	Nip	LOC_Os01g06560
5.23442e-06	1.12423	0.947	0.417	0.135582	Nip	LOC_Os02g49850
5.31544e-06	0.748913	0.895	0.306	0.137681	Nip	LOC_Os04g34100
5.52066e-06	0.765158	0.632	0.056	0.142996	Nip	LOC_Os12g42850
5.78826e-06	0.665594	0.684	0.083	0.149927	Nip	LOC_Os01g65090
6.55929e-06	0.717731	0.684	0.111	0.169899	Nip	LOC_Os02g51890
6.56403e-06	2.78492	0.789	0.194	0.170022	Nip	LOC_Os10g40510
6.78626e-06	0.966057	0.947	0.417	0.175778	Nip	LOC_Os06g05080
7.82167e-06	0.962962	1	0.889	0.202597	Nip	LOC_Os02g41590
7.90317e-06	0.716529	0.684	0.083	0.204708	Nip	LOC_Os03g20670
8.8017e-06	0.563784	0.632	0.083	0.227982	Nip	LOC_Os01g34700
8.83047e-06	1.03104	0.737	0.139	0.228727	Nip	LOC_Os04g17660
9.11998e-06	1.13501	0.474	0	0.236226	Nip	LOC_Os07g37100
9.11998e-06	1.00623	0.474	0	0.236226	Nip	LOC_Os01g25484
9.11998e-06	0.856254	0.474	0	0.236226	Nip	LOC_Os12g07710
9.11998e-06	0.823183	0.474	0	0.236226	Nip	LOC_Os10g25900
9.11998e-06	0.796269	0.474	0	0.236226	Nip	LOC_Os05g38410
9.11998e-06	0.612788	0.474	0	0.236226	Nip	LOC_Os02g38392
9.11998e-06	0.607952	0.474	0	0.236226	Nip	LOC_Os07g41820
9.11998e-06	0.60618	0.474	0	0.236226	Nip	LOC_Os09g15284
9.11998e-06	0.579269	0.474	0	0.236226	Nip	LOC_Os02g29550
9.11998e-06	0.572233	0.474	0	0.236226	Nip	LOC_Os10g39410
9.11998e-06	0.570382	0.474	0	0.236226	Nip	LOC_Os03g37864
9.11998e-06	0.514243	0.474	0	0.236226	Nip	LOC_Os01g70320
9.11998e-06	0.512549	0.474	0	0.236226	Nip	LOC_Os11g28600
9.11998e-06	0.493498	0.474	0	0.236226	Nip	LOC_Os02g11830
9.11998e-06	0.487254	0.474	0	0.236226	Nip	LOC_Os08g25734
9.11998e-06	0.480476	0.474	0	0.236226	Nip	LOC_Os01g56890
9.11998e-06	0.47514	0.474	0	0.236226	Nip	LOC_Os09g20820
9.11998e-06	0.446323	0.474	0	0.236226	Nip	LOC_Os05g13810
9.11998e-06	0.407434	0.474	0	0.236226	Nip	LOC_Os11g19800
9.26821e-06	1.31339	0.526	0.028	0.240065	Nip	LOC_Os07g42924
1.04213e-05	0.777909	0.526	0.028	0.269931	Nip	LOC_Os03g16480
1.04213e-05	0.503415	0.526	0.028	0.269931	Nip	LOC_Os10g39870
1.07127e-05	0.897951	0.737	0.139	0.277479	Nip	LOC_Os05g46200
1.16374e-05	0.756975	0.579	0.056	0.301433	Nip	LOC_Os11g06740
1.18396e-05	1.48026	0.842	0.417	0.306669	Nip	LOC_Os02g44500
1.21558e-05	0.750978	0.947	0.556	0.314859	Nip	LOC_Os10g17280
1.39969e-05	1.41213	0.789	0.167	0.362548	Nip	LOC_Os10g40530
1.44608e-05	0.604201	0.579	0.056	0.374562	Nip	LOC_Os07g39260
1.65555e-05	0.717148	0.526	0.028	0.428822	Nip	LOC_Os07g33997
1.8558e-05	0.61253	0.526	0.028	0.480689	Nip	LOC_Os01g15260
1.8558e-05	0.488262	0.526	0.028	0.480689	Nip	LOC_Os02g06330
1.90248e-05	0.887495	0.684	0.139	0.49278	Nip	LOC_Os03g48820
1.91902e-05	0.945543	0.842	0.306	0.497064	Nip	LOC_Os01g15029
1.96156e-05	0.991814	0.632	0.111	0.508084	Nip	LOC_Os05g38420
1.97678e-05	0.726165	0.842	0.167	0.512026	Nip	LOC_Os05g34710
2.07899e-05	0.642165	0.526	0.028	0.538499	Nip	LOC_Os03g58040
2.14716e-05	1.46526	0.947	0.556	0.556158	Nip	LOC_Os09g26610
2.21839e-05	0.457795	0.579	0.056	0.574607	Nip	LOC_Os03g03510
2.44065e-05	1.13587	0.579	0.083	0.632176	Nip	LOC_Os02g51670
2.52379e-05	1.05145	0.842	0.333	0.653713	Nip	LOC_Os05g14240
2.76476e-05	1.30561	0.737	0.194	0.716129	Nip	LOC_Os11g05530
2.88592e-05	1.20965	0.895	0.417	0.74751	Nip	LOC_Os03g61960
3.04059e-05	0.668929	0.579	0.056	0.787573	Nip	LOC_Os01g63470
3.30463e-05	0.518887	0.632	0.083	0.855965	Nip	LOC_Os07g47700
3.39357e-05	1.20642	0.895	0.333	0.879002	Nip	LOC_Os10g30150
3.44437e-05	1.0779	0.421	0	0.89216	Nip	LOC_Os04g02530
3.44437e-05	0.857977	0.421	0	0.89216	Nip	LOC_Os01g03144
3.44437e-05	0.695486	0.421	0	0.89216	Nip	LOC_Os11g40590
3.44437e-05	0.685412	0.421	0	0.89216	Nip	LOC_Os09g32169
3.44437e-05	0.63549	0.421	0	0.89216	Nip	LOC_Os03g22720
3.44437e-05	0.610526	0.421	0	0.89216	Nip	LOC_Os12g41500
3.44437e-05	0.526414	0.421	0	0.89216	Nip	LOC_Os03g32470
3.44437e-05	0.520354	0.421	0	0.89216	Nip	LOC_Os12g15505
3.44437e-05	0.517473	0.421	0	0.89216	Nip	LOC_Os04g49700
3.44437e-05	0.51635	0.421	0	0.89216	Nip	LOC_Os02g44000
3.44437e-05	0.456887	0.421	0	0.89216	Nip	LOC_Os01g43100
3.44437e-05	0.447186	0.421	0	0.89216	Nip	LOC_Os06g07869
3.44437e-05	0.425731	0.421	0	0.89216	Nip	LOC_Os03g61990
3.44437e-05	0.416523	0.421	0	0.89216	Nip	LOC_Os06g13230
3.44437e-05	0.380605	0.421	0	0.89216	Nip	LOC_Os02g46360
3.44437e-05	0.374414	0.421	0	0.89216	Nip	LOC_Os04g42000
3.44437e-05	0.321966	0.421	0	0.89216	Nip	LOC_Os04g39660
3.81477e-05	0.546593	0.474	0.028	0.988102	Nip	LOC_Os02g39920
3.81477e-05	0.534485	0.474	0.028	0.988102	Nip	LOC_Os12g16350
4.0757e-05	0.796549	0.842	0.306	1	Nip	LOC_Os04g32550
4.27475e-05	0.63771	0.474	0.028	1	Nip	LOC_Os08g43210
4.36394e-05	0.768847	1	0.528	1	Nip	LOC_Os01g49190
4.94211e-05	0.910806	0.579	0.083	1	Nip	LOC_Os09g15670
4.94211e-05	0.598762	0.579	0.083	1	Nip	LOC_Os07g26440
5.31825e-05	1.02172	1	0.556	1	Nip	LOC_Os10g26150
5.35713e-05	0.794223	0.474	0.028	1	Nip	LOC_Os10g28340
5.41049e-05	1.33727	0.684	0.167	1	Nip	LOC_Os08g04360
5.45504e-05	0.492339	0.579	0.083	1	Nip	LOC_Os01g66180
6.01813e-05	0.625204	0.579	0.083	1	Nip	LOC_Os04g15690
6.07798e-05	0.747687	0.737	0.194	1	Nip	LOC_Os07g48510
6.62212e-05	1.22493	0.947	0.722	1	Nip	LOC_Os02g16040
6.63596e-05	1.02044	0.579	0.083	1	Nip	LOC_Os08g04340
6.65618e-05	0.7532	0.895	0.361	1	Nip	LOC_Os04g56646
6.69586e-05	0.621841	0.474	0.028	1	Nip	LOC_Os07g36410
6.69586e-05	0.493297	0.474	0.028	1	Nip	LOC_Os05g48240
6.95411e-05	0.851794	0.632	0.139	1	Nip	LOC_Os04g54230
7.48439e-05	0.502472	0.632	0.111	1	Nip	LOC_Os03g01210
7.49783e-05	0.650526	1	0.806	1	Nip	LOC_Os06g47340
7.61413e-05	0.677004	0.632	0.139	1	Nip	LOC_Os02g05680
7.67485e-05	0.96441	0.684	0.194	1	Nip	LOC_Os11g47520
8.05608e-05	0.420828	0.579	0.083	1	Nip	LOC_Os10g06130
8.52924e-05	0.692011	1	0.75	1	Nip	LOC_Os02g48720
9.11587e-05	0.78495	0.632	0.139	1	Nip	LOC_Os01g32770
9.11587e-05	0.627788	0.632	0.139	1	Nip	LOC_Os06g45510
9.31039e-05	0.653396	0.474	0.028	1	Nip	LOC_Os02g15020
0.000101607	0.737121	0.842	0.25	1	Nip	LOC_Os01g50840
0.000103545	0.622167	0.526	0.056	1	Nip	LOC_Os10g21560
0.000103825	0.687747	0.947	0.361	1	Nip	LOC_Os05g41780
0.000104503	0.78871	1	0.556	1	Nip	LOC_Os06g09450
0.000105886	0.487814	1	0.306	1	Nip	LOC_Os09g35970
0.000106272	0.626154	1	0.75	1	Nip	LOC_Os01g46980
0.000107349	0.510521	0.579	0.083	1	Nip	LOC_Os10g30600
0.000107575	0.69005	0.632	0.167	1	Nip	LOC_Os03g14450
0.00010807	0.652063	1	0.528	1	Nip	LOC_Os04g42134
0.000111054	1.03195	0.947	0.722	1	Nip	LOC_Os10g22570
0.000125134	1.23153	0.368	0	1	Nip	LOC_Os10g40720
0.000125134	0.825334	0.368	0	1	Nip	LOC_Os12g36220
0.000125134	0.668815	0.368	0	1	Nip	LOC_Os07g12780
0.000125134	0.643281	0.368	0	1	Nip	LOC_Os03g18230
0.000125134	0.58048	0.368	0	1	Nip	LOC_Os07g48680
0.000125134	0.494094	0.368	0	1	Nip	LOC_Os04g56040
0.000125134	0.475684	0.368	0	1	Nip	LOC_Os09g19820
0.000125134	0.442316	0.368	0	1	Nip	LOC_Os03g21664
0.000125134	0.436672	0.368	0	1	Nip	LOC_Os08g13320
0.000125134	0.434226	0.368	0	1	Nip	LOC_Os02g43770
0.000125134	0.433754	0.368	0	1	Nip	LOC_Os08g28784
0.000125134	0.432335	0.368	0	1	Nip	LOC_Os05g39320
0.000125134	0.430853	0.368	0	1	Nip	LOC_Os05g50654
0.000125134	0.405971	0.368	0	1	Nip	LOC_Os07g20164
0.000125134	0.40446	0.368	0	1	Nip	LOC_Os11g11960
0.000125134	0.40264	0.368	0	1	Nip	LOC_Os10g34802
0.000125134	0.401037	0.368	0	1	Nip	LOC_Os02g53330
0.000125134	0.399957	0.368	0	1	Nip	LOC_Os08g04010
0.000125134	0.399739	0.368	0	1	Nip	LOC_Os01g22510
0.000125134	0.396261	0.368	0	1	Nip	LOC_Os09g02729
0.000125134	0.389385	0.368	0	1	Nip	LOC_Os04g58055
0.000125134	0.384129	0.368	0	1	Nip	LOC_Os04g35534
0.000125134	0.38392	0.368	0	1	Nip	LOC_Os12g28270
0.000125134	0.382172	0.368	0	1	Nip	LOC_Os06g50520
0.000125134	0.377661	0.368	0	1	Nip	LOC_Os01g43895
0.000125134	0.372441	0.368	0	1	Nip	LOC_Os01g05880
0.000125134	0.360757	0.368	0	1	Nip	LOC_Os03g18820
0.000125134	0.346298	0.368	0	1	Nip	LOC_Os02g04450
0.000125134	0.343578	0.368	0	1	Nip	LOC_Os07g28940
0.000125134	0.33977	0.368	0	1	Nip	LOC_Os11g29500
0.000125134	0.323015	0.368	0	1	Nip	LOC_Os04g26870
0.000125134	0.302442	0.368	0	1	Nip	LOC_Os03g48380
0.000125134	0.289402	0.368	0	1	Nip	LOC_Os03g62110
0.000125212	1.16594	0.789	0.361	1	Nip	LOC_Os07g47670
0.000129631	1.14449	0.895	0.333	1	Nip	LOC_Os02g37330
0.00013249	1.05992	0.947	0.667	1	Nip	LOC_Os10g33800
0.00013249	0.591408	0.947	0.667	1	Nip	LOC_Os01g18050
0.000132958	0.751238	0.842	0.389	1	Nip	LOC_Os06g11800
0.000135203	0.715617	0.895	0.389	1	Nip	LOC_Os04g10240
0.000140521	0.603997	0.737	0.194	1	Nip	LOC_Os05g25640
0.000141861	0.768326	0.632	0.139	1	Nip	LOC_Os06g50830
0.000149793	0.805322	0.421	0.028	1	Nip	LOC_Os08g28710
0.000149793	0.429131	0.421	0.028	1	Nip	LOC_Os09g28220
0.000149793	0.336361	0.421	0.028	1	Nip	LOC_Os06g37000
0.000162585	0.760621	0.895	0.333	1	Nip	LOC_Os03g32314
0.000164699	0.626606	0.737	0.222	1	Nip	LOC_Os06g36740
0.00016646	0.611455	0.895	0.361	1	Nip	LOC_Os07g49150
0.000167259	0.626355	0.421	0.028	1	Nip	LOC_Os01g14970
0.000167259	0.316325	0.421	0.028	1	Nip	LOC_Os07g30940
0.00016842	0.608673	0.474	0.056	1	Nip	LOC_Os03g44636
0.000169214	0.634553	0.789	0.278	1	Nip	LOC_Os05g03480
0.000170332	1.59843	0.895	0.444	1	Nip	LOC_Os01g15830
0.000171462	0.706292	0.579	0.083	1	Nip	LOC_Os06g05470
0.000173651	0.641064	0.526	0.083	1	Nip	LOC_Os03g50050
0.000183232	1.16512	0.895	0.417	1	Nip	LOC_Os07g09420
0.000183521	0.642963	1	0.694	1	Nip	LOC_Os08g44250
0.000188756	0.879456	0.842	0.417	1	Nip	LOC_Os04g58880
0.000192722	0.797215	0.684	0.194	1	Nip	LOC_Os01g54670
0.000200468	0.508884	0.632	0.139	1	Nip	LOC_Os03g13970
0.00020109	1.01665	0.579	0.139	1	Nip	LOC_Os02g07010
0.000207505	0.72324	0.895	0.5	1	Nip	LOC_Os01g42650
0.00021279	0.626902	0.684	0.167	1	Nip	LOC_Os06g39370
0.000214253	0.457612	0.789	0.25	1	Nip	LOC_Os01g10340
0.000219138	1.07578	0.684	0.222	1	Nip	LOC_Os03g18850
0.000225252	0.58465	0.579	0.111	1	Nip	LOC_Os01g64730
0.000233924	0.738045	1	0.639	1	Nip	LOC_Os08g27850
0.0002446	0.985222	0.737	0.222	1	Nip	LOC_Os05g28740
0.0002446	0.567877	0.737	0.222	1	Nip	LOC_Os03g17740
0.000249744	0.510163	0.789	0.25	1	Nip	LOC_Os01g62620
0.000254866	0.61308	1	0.833	1	Nip	LOC_Os03g60589
0.000256907	0.828157	1	0.917	1	Nip	LOC_Os03g46770
0.000258144	0.581068	0.421	0.028	1	Nip	LOC_Os05g34110
0.000258144	0.414842	0.421	0.028	1	Nip	LOC_Os06g49505
0.000272137	0.707633	0.842	0.472	1	Nip	LOC_Os06g13810
0.000274593	0.782324	0.842	0.611	1	Nip	LOC_Os09g31260
0.000277186	0.775806	0.526	0.083	1	Nip	LOC_Os05g01030
0.000277406	0.375998	0.474	0.056	1	Nip	LOC_Os01g31360
0.00027962	0.693741	0.895	0.472	1	Nip	LOC_Os08g25720
0.000284092	1.01766	0.579	0.139	1	Nip	LOC_Os08g30510
0.000287214	0.57818	0.421	0.028	1	Nip	LOC_Os03g64320
0.000287214	0.383611	0.421	0.028	1	Nip	LOC_Os08g04470
0.000308704	0.389197	0.789	0.194	1	Nip	LOC_Os06g14490
0.000313494	0.564346	0.947	0.417	1	Nip	LOC_Os05g48270
0.000314753	0.623872	1	0.667	1	Nip	LOC_Os06g50000
0.000323324	1.04697	0.526	0.111	1	Nip	LOC_Os04g34970
0.000326695	0.755628	1	0.556	1	Nip	LOC_Os07g14270
0.000332954	1.52933	0.526	0.083	1	Nip	LOC_Os01g01660
0.000332954	0.481952	0.526	0.083	1	Nip	LOC_Os01g68540
0.000334506	0.590049	0.789	0.278	1	Nip	LOC_Os06g03760
0.000348298	1.28606	0.789	0.5	1	Nip	LOC_Os08g41290
0.00035478	0.304063	0.421	0.028	1	Nip	LOC_Os12g37939
0.00035478	0.280681	0.421	0.028	1	Nip	LOC_Os10g32820
0.000357132	0.834499	0.842	0.556	1	Nip	LOC_Os10g08550
0.000360181	0.760767	0.789	0.278	1	Nip	LOC_Os07g08710
0.000364622	0.670845	0.526	0.083	1	Nip	LOC_Os05g51130
0.000373699	0.422728	0.842	0.25	1	Nip	LOC_Os02g04020
0.000380142	0.635915	0.579	0.111	1	Nip	LOC_Os07g46750
0.000386598	0.541795	1	0.917	1	Nip	LOC_Os01g09010
0.000390477	0.762137	0.789	0.389	1	Nip	LOC_Os05g42000
0.000424753	0.555083	0.947	0.444	1	Nip	LOC_Os09g12570
0.000433055	0.747785	0.579	0.139	1	Nip	LOC_Os04g44900
0.000436581	0.442363	0.526	0.083	1	Nip	LOC_Os01g34614
0.000436581	0.436593	0.526	0.083	1	Nip	LOC_Os11g36430
0.000438813	0.57723	0.316	0	1	Nip	LOC_Os07g26000
0.000438813	0.536113	0.316	0	1	Nip	LOC_Os10g38314
0.000438813	0.532181	0.316	0	1	Nip	LOC_Os07g36264
0.000438813	0.512361	0.316	0	1	Nip	LOC_Os07g34720
0.000438813	0.457377	0.316	0	1	Nip	LOC_Os08g30554
0.000438813	0.411535	0.316	0	1	Nip	LOC_Os02g44730
0.000438813	0.402815	0.316	0	1	Nip	LOC_Os10g36340
0.000438813	0.393516	0.316	0	1	Nip	LOC_Os08g04440
0.000438813	0.389701	0.316	0	1	Nip	LOC_Os07g07680
0.000438813	0.382892	0.316	0	1	Nip	LOC_Os07g12390
0.000438813	0.382416	0.316	0	1	Nip	LOC_Os12g32180
0.000438813	0.366891	0.316	0	1	Nip	LOC_Os06g50650
0.000438813	0.365569	0.316	0	1	Nip	LOC_Os05g36340
0.000438813	0.362535	0.316	0	1	Nip	LOC_Os07g33660
0.000438813	0.352316	0.316	0	1	Nip	LOC_Os09g27700
0.000438813	0.347681	0.316	0	1	Nip	LOC_Os08g06320
0.000438813	0.346538	0.316	0	1	Nip	LOC_Os07g33784
0.000438813	0.33327	0.316	0	1	Nip	LOC_Os10g35820
0.000438813	0.326784	0.316	0	1	Nip	LOC_Os01g05610
0.000438813	0.325337	0.316	0	1	Nip	LOC_Os01g65692
0.000438813	0.324716	0.316	0	1	Nip	LOC_Os10g35050
0.000438813	0.30878	0.316	0	1	Nip	LOC_Os05g29170
0.000438813	0.3043	0.316	0	1	Nip	LOC_Os01g62950
0.000438813	0.300891	0.316	0	1	Nip	LOC_Os03g11990
0.000438813	0.294983	0.316	0	1	Nip	LOC_Os02g50470
0.000438813	0.29489	0.316	0	1	Nip	LOC_Os12g11830
0.000438813	0.289509	0.316	0	1	Nip	LOC_Os06g41240
0.000438813	0.286878	0.316	0	1	Nip	LOC_Os03g57349
0.000438813	0.285038	0.316	0	1	Nip	LOC_Os04g35700
0.000438813	0.28272	0.316	0	1	Nip	LOC_Os10g35100
0.000438813	0.278055	0.316	0	1	Nip	LOC_Os03g05980
0.000438813	0.260916	0.316	0	1	Nip	LOC_Os07g29600
0.000438813	0.259849	0.316	0	1	Nip	LOC_Os06g24711
0.000438813	0.251881	0.316	0	1	Nip	LOC_Os10g25550
0.000438813	0.226818	0.316	0	1	Nip	LOC_Os07g03270
0.000439318	0.710655	0.789	0.361	1	Nip	LOC_Os07g31370
0.000440967	0.730139	0.842	0.306	1	Nip	LOC_Os03g52690
0.000463366	0.756443	0.947	0.472	1	Nip	LOC_Os03g18220
0.000463385	0.625876	0.947	0.667	1	Nip	LOC_Os10g42840
0.000471555	0.655646	0.789	0.361	1	Nip	LOC_Os01g52920
0.000494856	0.297761	0.474	0.056	1	Nip	LOC_Os06g49530
0.000506608	0.648157	0.789	0.306	1	Nip	LOC_Os03g11210
0.000523618	0.907621	0.895	0.556	1	Nip	LOC_Os05g11780
0.000525047	1.00734	0.842	0.389	1	Nip	LOC_Os11g47500
0.000528753	0.574648	0.474	0.083	1	Nip	LOC_Os07g44410
0.000530615	0.69678	0.842	0.528	1	Nip	LOC_Os03g45250
0.000532576	0.500441	1	0.806	1	Nip	LOC_Os04g24520
0.000539424	0.802858	1	0.944	1	Nip	LOC_Os03g16980
0.000554468	0.47913	0.684	0.167	1	Nip	LOC_Os10g30850
0.000562291	0.552811	0.368	0.028	1	Nip	LOC_Os03g17480
0.000562291	0.525522	0.368	0.028	1	Nip	LOC_Os02g43970
0.000562291	0.381528	0.368	0.028	1	Nip	LOC_Os12g02200
0.000563879	0.96075	0.579	0.194	1	Nip	LOC_Os09g29310
0.000580234	0.533406	0.579	0.111	1	Nip	LOC_Os04g02580
0.000581996	0.457178	0.842	0.333	1	Nip	LOC_Os04g41229
0.000594773	2.02931	0.526	0.111	1	Nip	LOC_Os03g46060
0.000601756	0.371063	0.579	0.139	1	Nip	LOC_Os02g15700
0.000608069	0.564646	0.737	0.222	1	Nip	LOC_Os01g17390
0.000609845	0.469423	0.632	0.167	1	Nip	LOC_Os01g70170
0.000610116	0.49824	1	0.833	1	Nip	LOC_Os09g38740
0.000611195	0.811556	0.684	0.278	1	Nip	LOC_Os08g44460
0.000622388	0.923706	0.632	0.194	1	Nip	LOC_Os04g02050
0.000625483	0.405138	0.368	0.028	1	Nip	LOC_Os03g55970
0.000625483	0.397614	0.368	0.028	1	Nip	LOC_Os10g23204
0.000625483	0.396789	0.368	0.028	1	Nip	LOC_Os03g14540
0.000625483	0.267664	0.368	0.028	1	Nip	LOC_Os02g35170
0.000644057	0.491463	0.684	0.222	1	Nip	LOC_Os02g58070
0.000645352	0.630462	0.895	0.444	1	Nip	LOC_Os03g52630
0.000654661	1.12261	0.421	0.056	1	Nip	LOC_Os06g38660
0.000654661	0.373685	0.421	0.056	1	Nip	LOC_Os08g10450
0.000655558	0.267296	0.474	0.056	1	Nip	LOC_Os02g12730
0.000659279	0.912126	0.632	0.167	1	Nip	LOC_Os04g59150
0.000681987	1.08718	0.789	0.389	1	Nip	LOC_Os07g48550
0.000681998	1.18959	0.895	0.472	1	Nip	LOC_Os03g12510
0.000683718	1.01172	0.895	0.611	1	Nip	LOC_Os01g62490
0.000689729	0.894784	0.789	0.278	1	Nip	LOC_Os07g41350
0.000690639	0.553151	0.789	0.417	1	Nip	LOC_Os11g04480
0.000716143	0.622882	0.789	0.361	1	Nip	LOC_Os05g39110
0.000732218	0.506024	0.737	0.25	1	Nip	LOC_Os08g04390
0.000740057	0.438	0.789	0.278	1	Nip	LOC_Os03g14990
0.00076651	0.547768	0.526	0.111	1	Nip	LOC_Os10g38950
0.00077215	0.39638	0.368	0.028	1	Nip	LOC_Os01g61150
0.00077215	0.349972	0.368	0.028	1	Nip	LOC_Os01g67220
0.000778608	0.680089	0.947	0.444	1	Nip	LOC_Os03g10860
0.000790551	0.824471	0.789	0.417	1	Nip	LOC_Os09g20350
0.000792895	0.410194	0.421	0.056	1	Nip	LOC_Os01g37980
0.000813863	0.400168	0.737	0.222	1	Nip	LOC_Os04g02354
0.000827925	0.645811	0.474	0.083	1	Nip	LOC_Os02g08420
0.000830982	0.752533	1	0.556	1	Nip	LOC_Os11g10480
0.000849261	0.612021	0.789	0.444	1	Nip	LOC_Os10g14011
0.000856909	0.430973	0.368	0.028	1	Nip	LOC_Os03g58880
0.000856909	0.379028	0.368	0.028	1	Nip	LOC_Os07g37760
0.000871749	0.994737	0.421	0.056	1	Nip	LOC_Os11g09280
0.000871749	0.49726	0.421	0.056	1	Nip	LOC_Os05g47670
0.000871749	0.447377	0.421	0.056	1	Nip	LOC_Os06g02420
0.000878565	0.592298	0.789	0.361	1	Nip	LOC_Os07g09060
0.000896257	0.377202	0.737	0.194	1	Nip	LOC_Os04g32110
0.000904074	0.468295	0.474	0.083	1	Nip	LOC_Os04g55640
0.000905463	0.435075	0.526	0.111	1	Nip	LOC_Os02g44230
0.000929327	0.535303	0.684	0.222	1	Nip	LOC_Os09g33810
0.000930971	0.873798	1	0.611	1	Nip	LOC_Os03g07870
0.000950228	0.466244	0.368	0.028	1	Nip	LOC_Os03g14730
0.000950228	0.30732	0.368	0.028	1	Nip	LOC_Os01g47490
0.000959277	0.509918	0.947	0.889	1	Nip	LOC_Os12g07140
0.000965808	0.397066	0.895	0.361	1	Nip	LOC_Os01g46070
0.000977752	0.523042	1	1	1	Nip	LOC_Os01g15270
0.000983377	0.434361	0.526	0.111	1	Nip	LOC_Os12g06100
0.000983377	0.352078	0.526	0.111	1	Nip	LOC_Os05g51700
0.000986671	0.543482	0.474	0.083	1	Nip	LOC_Os12g06260
0.00100794	1.01575	1	0.778	1	Nip	LOC_Os02g44630
0.00100831	0.695488	1	0.5	1	Nip	LOC_Os03g50885
0.00100876	0.601159	0.684	0.25	1	Nip	LOC_Os06g45500
0.00102797	0.345028	0.579	0.111	1	Nip	LOC_Os12g44150
0.00103977	0.838402	0.947	0.583	1	Nip	LOC_Os07g38730
0.00105147	0.451888	0.579	0.139	1	Nip	LOC_Os06g39260
0.00105171	0.442477	0.421	0.056	1	Nip	LOC_Os11g37730
0.00105171	0.34629	0.421	0.056	1	Nip	LOC_Os01g45910
0.00105289	0.342425	0.368	0.028	1	Nip	LOC_Os07g39840
0.00105289	0.333208	0.368	0.028	1	Nip	LOC_Os10g27340
0.00105289	0.28897	0.368	0.028	1	Nip	LOC_Os04g47120
0.00105289	0.281471	0.368	0.028	1	Nip	LOC_Os04g20220
0.00105289	0.275913	0.368	0.028	1	Nip	LOC_Os03g21550
0.00105289	0.244882	0.368	0.028	1	Nip	LOC_Os04g38330
0.00107621	0.514184	0.474	0.083	1	Nip	LOC_Os02g46350
0.0010796	0.666317	1	0.806	1	Nip	LOC_Os01g59150
0.00108887	0.73114	0.737	0.333	1	Nip	LOC_Os04g45970
0.00110953	0.53326	0.947	0.528	1	Nip	LOC_Os05g38630
0.00115405	0.493267	0.421	0.056	1	Nip	LOC_Os04g45170
0.00115847	0.565347	0.526	0.139	1	Nip	LOC_Os03g61680
0.00115973	0.505916	0.737	0.306	1	Nip	LOC_Os01g28680
0.00116573	0.289351	0.368	0.028	1	Nip	LOC_Os04g04030
0.00116573	0.249787	0.368	0.028	1	Nip	LOC_Os11g04950
0.00116573	0.229282	0.368	0.028	1	Nip	LOC_Os02g58440
0.00118233	0.717171	0.947	0.722	1	Nip	LOC_Os10g07440
0.00121488	0.486271	0.632	0.222	1	Nip	LOC_Os01g71230
0.00122147	0.420595	0.947	0.667	1	Nip	LOC_Os04g52130
0.00122926	0.703627	0.579	0.167	1	Nip	LOC_Os12g42980
0.00125386	0.618716	0.842	0.444	1	Nip	LOC_Os12g07220
0.00125592	0.408392	0.526	0.111	1	Nip	LOC_Os08g09250
0.00126001	0.637607	0.947	0.556	1	Nip	LOC_Os07g41360
0.00126553	0.652815	0.421	0.056	1	Nip	LOC_Os04g24140
0.00126553	0.273129	0.421	0.056	1	Nip	LOC_Os06g38470
0.00127824	0.35414	0.474	0.083	1	Nip	LOC_Os03g46730
0.00133606	0.547499	0.684	0.25	1	Nip	LOC_Os11g21990
0.00134071	0.732717	0.842	0.583	1	Nip	LOC_Os09g36350
0.00136195	0.21823	0.684	0.167	1	Nip	LOC_Os02g51730
0.00138688	0.490274	0.421	0.056	1	Nip	LOC_Os03g10640
0.00138688	0.406313	0.421	0.056	1	Nip	LOC_Os08g33920
0.00139167	0.587974	0.842	0.5	1	Nip	LOC_Os03g14570
0.00139189	0.326454	0.474	0.083	1	Nip	LOC_Os03g40010
0.00141211	0.650232	0.632	0.194	1	Nip	LOC_Os01g50720
0.00149168	1.12857	0.263	0	1	Nip	LOC_Os10g40620
0.00149168	0.57312	0.263	0	1	Nip	LOC_Os07g37466
0.00149168	0.560534	0.263	0	1	Nip	LOC_Os08g34210
0.00149168	0.550314	0.263	0	1	Nip	LOC_Os07g39350
0.00149168	0.490722	0.263	0	1	Nip	LOC_Os07g43770
0.00149168	0.489496	0.263	0	1	Nip	LOC_Os03g19580
0.00149168	0.48356	0.263	0	1	Nip	LOC_Os05g40770
0.00149168	0.48024	0.263	0	1	Nip	LOC_Os09g26960
0.00149168	0.454976	0.263	0	1	Nip	LOC_Os08g14860
0.00149168	0.452356	0.263	0	1	Nip	LOC_Os05g40630
0.00149168	0.429025	0.263	0	1	Nip	LOC_Os11g09979
0.00149168	0.41809	0.263	0	1	Nip	LOC_Os02g50810
0.00149168	0.41665	0.263	0	1	Nip	LOC_Os07g22494
0.00149168	0.413165	0.263	0	1	Nip	LOC_Os05g35780
0.00149168	0.397057	0.263	0	1	Nip	LOC_Os02g57280
0.00149168	0.39643	0.263	0	1	Nip	LOC_Os07g34620
0.00149168	0.388013	0.263	0	1	Nip	LOC_Os05g30900
0.00149168	0.367347	0.263	0	1	Nip	LOC_Os10g38730
0.00149168	0.365906	0.263	0	1	Nip	LOC_Os02g39030
0.00149168	0.332609	0.263	0	1	Nip	LOC_Os03g56241
0.00149168	0.316788	0.263	0	1	Nip	LOC_Os03g06490
0.00149168	0.298741	0.263	0	1	Nip	LOC_Os07g40640
0.00149168	0.295004	0.263	0	1	Nip	LOC_Os06g27800
0.00149168	0.289211	0.263	0	1	Nip	LOC_Os07g47970
0.00149168	0.287849	0.263	0	1	Nip	LOC_Os10g37630
0.00149168	0.280344	0.263	0	1	Nip	LOC_Os01g71630
0.00149168	0.273869	0.263	0	1	Nip	LOC_Os03g63999
0.00149168	0.267228	0.263	0	1	Nip	LOC_Os03g17120
0.00149168	0.259266	0.263	0	1	Nip	LOC_Os09g21380
0.00149168	0.257004	0.263	0	1	Nip	LOC_Os02g26790
0.00149168	0.250151	0.263	0	1	Nip	LOC_Os08g42290
0.00149168	0.243898	0.263	0	1	Nip	LOC_Os01g52810
0.00149168	0.241284	0.263	0	1	Nip	LOC_Os02g34884
0.00149168	0.237856	0.263	0	1	Nip	LOC_Os03g05780
0.00149168	0.237326	0.263	0	1	Nip	LOC_Os01g66110
0.00149168	0.234458	0.263	0	1	Nip	LOC_Os01g51380
0.00149168	0.223424	0.263	0	1	Nip	LOC_Os11g34790
0.00149168	0.222051	0.263	0	1	Nip	LOC_Os03g39000
0.00149168	0.220083	0.263	0	1	Nip	LOC_Os11g13880
0.00149168	0.213936	0.263	0	1	Nip	LOC_Os10g17740
0.00149168	0.211211	0.263	0	1	Nip	LOC_Os12g13940
0.00149168	0.209902	0.263	0	1	Nip	LOC_Os01g06220
0.00149168	0.208614	0.263	0	1	Nip	LOC_Os08g44380
0.00149168	0.203184	0.263	0	1	Nip	LOC_Os03g27460
0.00150064	0.450631	0.947	0.472	1	Nip	LOC_Os02g34870
0.00151479	0.43829	0.474	0.083	1	Nip	LOC_Os01g67560
0.00151479	0.434099	0.474	0.083	1	Nip	LOC_Os02g41670
0.00151888	0.307447	0.421	0.056	1	Nip	LOC_Os01g36930
0.00152789	0.406285	0.684	0.222	1	Nip	LOC_Os05g05560
0.00154517	0.456728	0.579	0.139	1	Nip	LOC_Os05g51530
0.00158493	0.835891	0.526	0.139	1	Nip	LOC_Os10g38340
0.00158493	0.440372	0.526	0.139	1	Nip	LOC_Os01g09890
0.00159679	0.339849	0.526	0.111	1	Nip	LOC_Os05g07090
0.00161712	0.436823	0.895	0.417	1	Nip	LOC_Os03g51530
0.00164305	0.790393	0.684	0.25	1	Nip	LOC_Os03g20630
0.00164758	0.690884	0.895	0.5	1	Nip	LOC_Os12g25700
0.00164762	0.423749	0.474	0.083	1	Nip	LOC_Os01g06600
0.00168945	0.963626	0.579	0.222	1	Nip	LOC_Os07g47620
0.00171208	0.931313	0.526	0.139	1	Nip	LOC_Os12g02370
0.00171784	0.827066	0.684	0.306	1	Nip	LOC_Os05g03590
0.00172812	0.610135	0.526	0.111	1	Nip	LOC_Os04g37904
0.00173391	0.505168	0.789	0.306	1	Nip	LOC_Os12g39860
0.00173998	0.769666	0.947	0.694	1	Nip	LOC_Os11g26850
0.00178465	0.650835	0.579	0.167	1	Nip	LOC_Os05g02530
0.00186933	0.435708	0.526	0.111	1	Nip	LOC_Os12g01260
0.00187797	0.531317	0.579	0.194	1	Nip	LOC_Os01g13770
0.00188245	0.413717	0.684	0.25	1	Nip	LOC_Os10g23100
0.00197939	0.583976	1	0.778	1	Nip	LOC_Os01g47780
0.00198742	0.305899	0.421	0.056	1	Nip	LOC_Os09g25310
0.00199593	1.06661	0.421	0.083	1	Nip	LOC_Os01g66900
0.00201558	0.4788	0.842	0.361	1	Nip	LOC_Os02g08090
0.0020184	0.480379	0.947	0.639	1	Nip	LOC_Os03g44560
0.00202179	0.685388	0.316	0.028	1	Nip	LOC_Os04g31520
0.00202179	0.646213	0.316	0.028	1	Nip	LOC_Os12g06030
0.00202179	0.439125	0.316	0.028	1	Nip	LOC_Os01g55240
0.00202179	0.41824	0.316	0.028	1	Nip	LOC_Os05g44130
0.00202179	0.299732	0.316	0.028	1	Nip	LOC_Os07g38070
0.00202179	0.287285	0.316	0.028	1	Nip	LOC_Os01g15600
0.00202268	0.475858	1	0.667	1	Nip	LOC_Os09g25490
0.00206933	0.682559	1	0.722	1	Nip	LOC_Os01g15320
0.00208777	0.470201	0.895	0.389	1	Nip	LOC_Os07g31490
0.00208806	0.863388	0.579	0.222	1	Nip	LOC_Os03g06390
0.00214711	0.611034	1	0.667	1	Nip	LOC_Os11g26860
0.00214861	0.574947	0.895	0.472	1	Nip	LOC_Os05g08414
0.00215195	0.454957	0.526	0.139	1	Nip	LOC_Os10g27174
0.00215442	0.556383	0.684	0.222	1	Nip	LOC_Os05g44922
0.00216233	0.522716	0.632	0.194	1	Nip	LOC_Os07g01990
0.00216624	0.604627	0.579	0.194	1	Nip	LOC_Os02g57240
0.00217305	0.535006	0.421	0.083	1	Nip	LOC_Os03g03034
0.00217305	0.531001	0.421	0.083	1	Nip	LOC_Os08g08650
0.00217305	0.406952	0.421	0.083	1	Nip	LOC_Os06g36490
0.00217305	0.374605	0.421	0.083	1	Nip	LOC_Os04g08740
0.00218954	0.508911	0.895	0.583	1	Nip	LOC_Os08g33460
0.00223976	0.483699	0.316	0.028	1	Nip	LOC_Os08g35190
0.00223976	0.376471	0.316	0.028	1	Nip	LOC_Os08g37480
0.00223976	0.349421	0.316	0.028	1	Nip	LOC_Os05g07260
0.00224495	0.704476	0.789	0.306	1	Nip	LOC_Os03g45920
0.002245	0.34331	0.579	0.139	1	Nip	LOC_Os02g57600
0.00228462	0.456037	0.842	0.361	1	Nip	LOC_Os02g34510
0.00229321	0.27367	0.474	0.083	1	Nip	LOC_Os05g41180
0.00231818	0.476257	0.632	0.194	1	Nip	LOC_Os01g68940
0.00232137	0.612382	0.895	0.528	1	Nip	LOC_Os05g42330
0.00232468	0.523945	0.947	0.556	1	Nip	LOC_Os06g37180
0.00234315	0.66509	1	0.611	1	Nip	LOC_Os05g01820
0.00236195	0.39541	0.895	0.389	1	Nip	LOC_Os09g23160
0.00236581	0.35272	0.842	0.389	1	Nip	LOC_Os01g15310
0.00238289	0.767126	1	0.639	1	Nip	LOC_Os08g43550
0.00239837	0.512993	0.368	0.056	1	Nip	LOC_Os11g47510
0.00239837	0.473048	0.368	0.056	1	Nip	LOC_Os06g02370
0.00239837	0.355269	0.368	0.056	1	Nip	LOC_Os01g51390
0.00239837	0.352876	0.368	0.056	1	Nip	LOC_Os04g52760
0.0024008	0.555376	1	0.944	1	Nip	LOC_Os08g38900
0.00244731	0.34721	0.474	0.111	1	Nip	LOC_Os07g32450
0.00247039	0.415015	0.947	0.528	1	Nip	LOC_Os08g25590
0.00247907	0.429058	0.316	0.028	1	Nip	LOC_Os06g22960
0.00247907	0.417004	0.316	0.028	1	Nip	LOC_Os02g56460
0.00247907	0.269101	0.316	0.028	1	Nip	LOC_Os07g28400
0.00249362	0.610585	0.842	0.444	1	Nip	LOC_Os04g59040
0.00252765	0.780025	0.947	0.667	1	Nip	LOC_Os02g33070
0.00254921	0.65037	0.737	0.333	1	Nip	LOC_Os12g01560
0.00256289	0.487541	0.579	0.167	1	Nip	LOC_Os05g45300
0.00256289	0.425917	0.579	0.167	1	Nip	LOC_Os10g06540
0.00261763	0.644242	0.632	0.222	1	Nip	LOC_Os06g47130
0.00262769	0.693676	0.632	0.278	1	Nip	LOC_Os12g10320
0.00263934	0.239346	0.789	0.278	1	Nip	LOC_Os05g43540
0.00274157	1.0059	0.316	0.028	1	Nip	LOC_Os10g18340
0.00274157	0.400274	0.316	0.028	1	Nip	LOC_Os07g40910
0.00274157	0.393244	0.316	0.028	1	Nip	LOC_Os01g67134
0.00274157	0.254112	0.316	0.028	1	Nip	LOC_Os06g06720
0.00275168	0.648656	0.579	0.167	1	Nip	LOC_Os04g56290
0.00275168	0.39752	0.579	0.167	1	Nip	LOC_Os07g41160
0.00277762	0.500628	1	0.722	1	Nip	LOC_Os01g09620
0.00279436	0.381338	0.421	0.083	1	Nip	LOC_Os01g06580
0.00280021	0.511357	0.632	0.222	1	Nip	LOC_Os02g40110
0.00287376	0.466509	0.368	0.056	1	Nip	LOC_Os10g39810
0.00287376	0.321001	0.368	0.056	1	Nip	LOC_Os06g48570
0.00289974	0.468123	0.526	0.139	1	Nip	LOC_Os06g22140
0.00289974	0.386517	0.526	0.139	1	Nip	LOC_Os08g05840
0.00291436	0.541842	1	0.806	1	Nip	LOC_Os04g51270
0.00295529	0.556766	0.684	0.278	1	Nip	LOC_Os02g40830
0.00296352	0.578032	0.474	0.139	1	Nip	LOC_Os04g58920
0.00302924	0.367344	0.316	0.028	1	Nip	LOC_Os03g16260
0.00302924	0.340006	0.316	0.028	1	Nip	LOC_Os08g03440
0.00302924	0.299901	0.316	0.028	1	Nip	LOC_Os11g06930
0.00303507	0.344865	0.421	0.083	1	Nip	LOC_Os05g23530
0.00303507	0.341438	0.421	0.083	1	Nip	LOC_Os07g46340
0.00303507	0.24841	0.421	0.083	1	Nip	LOC_Os02g23890
0.00307305	0.449491	0.579	0.194	1	Nip	LOC_Os06g06910
0.00314239	0.333305	0.368	0.056	1	Nip	LOC_Os01g09550
0.0032007	0.664526	0.632	0.222	1	Nip	LOC_Os01g65830
0.00320842	0.395833	0.895	0.361	1	Nip	LOC_Os03g63860
0.00325336	0.235482	0.737	0.25	1	Nip	LOC_Os01g20181
0.00329455	0.409915	0.421	0.083	1	Nip	LOC_Os06g49320
0.00329455	0.349309	0.421	0.083	1	Nip	LOC_Os03g61010
0.00334419	0.382279	0.316	0.028	1	Nip	LOC_Os03g10210
0.00334419	0.369476	0.316	0.028	1	Nip	LOC_Os10g25674
0.00334419	0.269523	0.316	0.028	1	Nip	LOC_Os03g18580
0.00334419	0.254705	0.316	0.028	1	Nip	LOC_Os06g05720
0.00334419	0.232375	0.316	0.028	1	Nip	LOC_Os12g31790
0.00334419	0.216717	0.316	0.028	1	Nip	LOC_Os12g13390
0.00337689	0.458629	1	0.833	1	Nip	LOC_Os01g59440
0.0034084	0.379318	0.684	0.25	1	Nip	LOC_Os06g44250
0.00346477	0.643577	0.842	0.5	1	Nip	LOC_Os03g25270
0.00350599	0.617167	0.737	0.417	1	Nip	LOC_Os10g35870
0.00352323	0.527766	1	0.611	1	Nip	LOC_Os05g33360
0.00360868	0.411226	0.526	0.139	1	Nip	LOC_Os06g05670
0.00364072	0.340526	0.579	0.167	1	Nip	LOC_Os06g16260
0.00365273	0.617051	0.632	0.222	1	Nip	LOC_Os04g54870
0.00365273	0.571328	0.632	0.222	1	Nip	LOC_Os08g32870
0.00368868	0.256441	0.316	0.028	1	Nip	LOC_Os04g52300
0.00368868	0.247747	0.316	0.028	1	Nip	LOC_Os02g37862
0.00368868	0.219091	0.316	0.028	1	Nip	LOC_Os03g38000
0.00371611	0.458729	0.526	0.167	1	Nip	LOC_Os08g43560
0.00372523	0.542887	0.737	0.306	1	Nip	LOC_Os05g33270
0.00374944	0.44175	0.368	0.056	1	Nip	LOC_Os02g49860
0.00374944	0.263911	0.368	0.056	1	Nip	LOC_Os03g60400
0.00377144	0.737579	0.579	0.194	1	Nip	LOC_Os11g01570
0.00387323	0.692458	0.684	0.25	1	Nip	LOC_Os04g55650
0.003879	0.439808	1	0.583	1	Nip	LOC_Os05g43360
0.00388683	0.266548	0.474	0.111	1	Nip	LOC_Os07g02210
0.00389987	0.376542	0.632	0.222	1	Nip	LOC_Os07g09330
0.00393495	0.75834	0.684	0.361	1	Nip	LOC_Os01g53710
0.00398632	0.51777	0.526	0.167	1	Nip	LOC_Os05g02820
0.00409133	0.351222	0.368	0.056	1	Nip	LOC_Os03g10200
0.00409133	0.301341	0.368	0.056	1	Nip	LOC_Os03g58050
0.00409133	0.289037	0.368	0.056	1	Nip	LOC_Os05g37200
0.00410528	0.688208	0.947	0.611	1	Nip	LOC_Os07g48630
0.00412371	0.44559	1	0.417	1	Nip	LOC_Os05g37830
0.0041621	0.604185	0.632	0.222	1	Nip	LOC_Os08g26870
0.00419067	0.398478	0.474	0.111	1	Nip	LOC_Os08g36170
0.00419067	0.3242	0.474	0.111	1	Nip	LOC_Os03g20520
0.00419067	0.279971	0.474	0.111	1	Nip	LOC_Os09g37020
0.00419883	0.369601	0.421	0.083	1	Nip	LOC_Os12g31490
0.00421157	0.541453	0.737	0.306	1	Nip	LOC_Os07g45090
0.00427424	0.632323	0.526	0.167	1	Nip	LOC_Os04g48840
0.00427424	0.441762	0.526	0.167	1	Nip	LOC_Os05g06440
0.00429185	0.5857	0.474	0.139	1	Nip	LOC_Os03g55850
0.00437968	0.479905	0.947	0.583	1	Nip	LOC_Os05g41440
0.00446128	0.485263	0.368	0.056	1	Nip	LOC_Os01g51430
0.00446128	0.424727	0.368	0.056	1	Nip	LOC_Os07g40940
0.00446128	0.37145	0.368	0.056	1	Nip	LOC_Os03g10250
0.00446128	0.339456	0.368	0.056	1	Nip	LOC_Os10g36200
0.00446128	0.265455	0.368	0.056	1	Nip	LOC_Os04g38885
0.00446128	0.250781	0.368	0.056	1	Nip	LOC_Os09g32526
0.00450463	0.591409	0.895	0.611	1	Nip	LOC_Os02g41780
0.00451592	0.369098	0.474	0.111	1	Nip	LOC_Os01g58870
0.00454698	0.2272	0.421	0.083	1	Nip	LOC_Os05g45930
0.00457582	0.843549	0.789	0.417	1	Nip	LOC_Os07g48140
0.0045809	0.59571	0.526	0.167	1	Nip	LOC_Os03g05390
0.0045809	0.480355	0.526	0.167	1	Nip	LOC_Os05g31770
0.0046328	0.491366	0.947	0.583	1	Nip	LOC_Os06g06160
0.004673	0.63518	0.947	0.528	1	Nip	LOC_Os06g11490
0.00467899	0.411262	0.684	0.25	1	Nip	LOC_Os06g45120
0.00479881	0.356252	0.526	0.139	1	Nip	LOC_Os10g10500
0.00485327	0.390265	0.632	0.194	1	Nip	LOC_Os05g32630
0.00486128	0.273025	0.368	0.056	1	Nip	LOC_Os02g39830
0.00486128	0.246346	0.368	0.056	1	Nip	LOC_Os01g07100
0.00486386	0.408524	0.474	0.111	1	Nip	LOC_Os08g30930
0.00492108	0.272594	0.421	0.083	1	Nip	LOC_Os01g49000
0.00494452	1.11048	0.211	0	1	Nip	LOC_Os04g54620
0.00494452	1.07326	0.211	0	1	Nip	LOC_Os03g01309
0.00494452	0.584886	0.211	0	1	Nip	LOC_Os10g38780
0.00494452	0.549873	0.211	0	1	Nip	LOC_Os04g36040
0.00494452	0.445557	0.211	0	1	Nip	LOC_Os09g02814
0.00494452	0.429498	0.211	0	1	Nip	EVM0047284
0.00494452	0.41479	0.211	0	1	Nip	LOC_Os02g48450
0.00494452	0.403539	0.211	0	1	Nip	LOC_Os12g04150
0.00494452	0.400878	0.211	0	1	Nip	LOC_Os10g32700
0.00494452	0.399009	0.211	0	1	Nip	LOC_Os12g41820
0.00494452	0.39866	0.211	0	1	Nip	LOC_Os11g13870
0.00494452	0.389174	0.211	0	1	Nip	LOC_Os12g38270
0.00494452	0.380271	0.211	0	1	Nip	LOC_Os08g02996
0.00494452	0.359384	0.211	0	1	Nip	LOC_Os04g52770
0.00494452	0.356271	0.211	0	1	Nip	LOC_Os09g31031
0.00494452	0.350874	0.211	0	1	Nip	LOC_Os06g05184
0.00494452	0.335847	0.211	0	1	Nip	LOC_Os08g30370
0.00494452	0.330898	0.211	0	1	Nip	LOC_Os10g04270
0.00494452	0.30741	0.211	0	1	Nip	LOC_Os11g13490
0.00494452	0.304355	0.211	0	1	Nip	LOC_Os04g01674
0.00494452	0.300304	0.211	0	1	Nip	LOC_Os04g56060
0.00494452	0.288741	0.211	0	1	Nip	LOC_Os07g35740
0.00494452	0.284678	0.211	0	1	Nip	LOC_Os09g17530
0.00494452	0.272578	0.211	0	1	Nip	LOC_Os04g10214
0.00494452	0.271572	0.211	0	1	Nip	LOC_Os07g36200
0.00494452	0.271093	0.211	0	1	Nip	LOC_Os07g49140
0.00494452	0.269804	0.211	0	1	Nip	LOC_Os08g01660
0.00494452	0.267447	0.211	0	1	Nip	LOC_Os08g43160
0.00494452	0.267057	0.211	0	1	Nip	LOC_Os11g28130
0.00494452	0.26652	0.211	0	1	Nip	LOC_Os12g44220
0.00494452	0.26588	0.211	0	1	Nip	LOC_Os07g38370
0.00494452	0.264683	0.211	0	1	Nip	LOC_Os05g04210
0.00494452	0.260933	0.211	0	1	Nip	LOC_Os12g36735
0.00494452	0.260886	0.211	0	1	Nip	LOC_Os03g50570
0.00494452	0.260331	0.211	0	1	Nip	LOC_Os04g51770
0.00494452	0.250639	0.211	0	1	Nip	LOC_Os05g33410
0.00494452	0.248083	0.211	0	1	Nip	LOC_Os04g59494
0.00494452	0.247894	0.211	0	1	Nip	LOC_Os05g01230
0.00494452	0.245582	0.211	0	1	Nip	LOC_Os03g49990
0.00494452	0.242867	0.211	0	1	Nip	LOC_Os04g46893
0.00494452	0.242419	0.211	0	1	Nip	LOC_Os01g37280
0.00494452	0.24181	0.211	0	1	Nip	LOC_Os04g08800
0.00494452	0.239828	0.211	0	1	Nip	LOC_Os03g04490
0.00494452	0.239812	0.211	0	1	Nip	LOC_Os08g02864
0.00494452	0.234096	0.211	0	1	Nip	LOC_Os01g26070
0.00494452	0.233059	0.211	0	1	Nip	LOC_Os08g13690
0.00494452	0.232871	0.211	0	1	Nip	LOC_Os04g44400
0.00494452	0.232748	0.211	0	1	Nip	LOC_Os04g24180
0.00494452	0.232474	0.211	0	1	Nip	LOC_Os05g37700
0.00494452	0.227948	0.211	0	1	Nip	LOC_Os04g41950
0.00494452	0.227373	0.211	0	1	Nip	LOC_Os10g36690
0.00494452	0.226644	0.211	0	1	Nip	LOC_Os09g25060
0.00494452	0.225592	0.211	0	1	Nip	LOC_Os06g02380
0.00494452	0.222462	0.211	0	1	Nip	LOC_Os04g56480
0.00494452	0.222151	0.211	0	1	Nip	LOC_Os10g23090
0.00494452	0.220285	0.211	0	1	Nip	LOC_Os07g23944
0.00494452	0.220192	0.211	0	1	Nip	LOC_Os08g13930
0.00494452	0.21922	0.211	0	1	Nip	LOC_Os06g41590
0.00494452	0.219182	0.211	0	1	Nip	LOC_Os03g15240
0.00494452	0.219087	0.211	0	1	Nip	LOC_Os05g08410
0.00494452	0.218546	0.211	0	1	Nip	LOC_Os05g04180
0.00494452	0.21811	0.211	0	1	Nip	LOC_Os04g17479
0.00494452	0.217765	0.211	0	1	Nip	LOC_Os01g26020
0.00494452	0.21579	0.211	0	1	Nip	LOC_Os03g08730
0.00494452	0.21302	0.211	0	1	Nip	LOC_Os03g15050
0.00494452	0.211869	0.211	0	1	Nip	LOC_Os07g06500
0.00494452	0.209861	0.211	0	1	Nip	LOC_Os05g36160
0.00494452	0.209315	0.211	0	1	Nip	LOC_Os09g19734
0.00494452	0.209081	0.211	0	1	Nip	LOC_Os01g47430
0.00494452	0.208904	0.211	0	1	Nip	LOC_Os01g57890
0.00494452	0.208856	0.211	0	1	Nip	LOC_Os08g06360
0.00494452	0.207636	0.211	0	1	Nip	LOC_Os05g37060
0.00494452	0.205379	0.211	0	1	Nip	LOC_Os07g40570
0.00495992	0.518566	0.474	0.139	1	Nip	LOC_Os05g40820
0.00502432	0.449179	1	0.944	1	Nip	LOC_Os07g45060
0.00506875	0.490424	0.368	0.083	1	Nip	LOC_Os06g14180
0.00506875	0.296709	0.368	0.083	1	Nip	LOC_Os04g40190
0.00517783	0.429955	1	0.972	1	Nip	LOC_Os03g59220
0.00519636	0.645279	0.684	0.278	1	Nip	LOC_Os05g28730
0.00525471	0.66867	0.526	0.167	1	Nip	LOC_Os06g50300
0.00525471	0.365138	0.526	0.167	1	Nip	LOC_Os04g58580
0.00529346	0.250124	0.368	0.056	1	Nip	LOC_Os08g27070
0.0053228	0.363581	0.421	0.083	1	Nip	LOC_Os05g19150
0.0053228	0.362718	0.421	0.083	1	Nip	LOC_Os02g58640
0.00535067	0.43402	0.895	0.417	1	Nip	LOC_Os08g37490
0.00540712	0.512867	0.789	0.444	1	Nip	LOC_Os07g26700
0.00552275	0.374635	0.789	0.278	1	Nip	LOC_Os01g07310
0.00556307	0.490913	0.842	0.417	1	Nip	LOC_Os06g15360
0.00561691	0.584572	0.579	0.194	1	Nip	LOC_Os09g16510
0.00561691	0.370756	0.579	0.194	1	Nip	LOC_Os01g73230
0.00562413	0.344747	0.526	0.167	1	Nip	LOC_Os04g50204
0.00568915	0.420228	0.737	0.306	1	Nip	LOC_Os01g22520
0.00569267	0.384612	0.737	0.25	1	Nip	LOC_Os06g49480
0.00576005	0.234844	0.368	0.056	1	Nip	LOC_Os01g61460
0.00586105	0.527871	0.421	0.111	1	Nip	LOC_Os10g40360
0.00588675	0.316506	0.632	0.194	1	Nip	LOC_Os03g32580
0.00590117	0.780554	0.789	0.5	1	Nip	LOC_Os07g12340
0.00591328	0.35658	0.526	0.139	1	Nip	LOC_Os09g23570
0.00600265	0.552148	0.947	0.806	1	Nip	LOC_Os02g52550
0.00601681	0.323268	0.526	0.167	1	Nip	LOC_Os05g45280
0.00603557	0.514303	0.737	0.306	1	Nip	LOC_Os04g36859
0.00604037	0.748894	0.526	0.194	1	Nip	LOC_Os01g64520
0.00609726	0.517933	0.789	0.417	1	Nip	LOC_Os03g63710
0.00613348	0.21547	1	0.75	1	Nip	LOC_Os06g46000
0.00621625	0.305097	0.421	0.083	1	Nip	LOC_Os08g03640
0.00622987	0.479602	0.737	0.361	1	Nip	LOC_Os02g45180
0.0063798	0.379827	0.316	0.056	1	Nip	LOC_Os07g13170
0.00640088	0.420283	0.737	0.306	1	Nip	LOC_Os06g03660
0.00643177	0.623543	0.632	0.333	1	Nip	LOC_Os08g03290
0.00645582	0.531212	0.368	0.083	1	Nip	LOC_Os01g47635
0.00649112	0.577639	0.895	0.583	1	Nip	LOC_Os05g35190
0.00652663	0.460784	1	1	1	Nip	LOC_Os11g14220
0.00658512	0.377291	0.474	0.139	1	Nip	LOC_Os12g03720
0.00671178	0.24129	0.421	0.083	1	Nip	LOC_Os06g14510
0.00681642	0.341655	0.579	0.194	1	Nip	LOC_Os12g32240
0.00687711	0.560999	0.526	0.167	1	Nip	LOC_Os08g40060
0.00687711	0.270387	0.526	0.167	1	Nip	LOC_Os02g17280
0.00687935	0.230507	0.947	0.528	1	Nip	LOC_Os07g44350
0.00688676	0.361458	0.947	0.5	1	Nip	LOC_Os03g21230
0.00690749	0.330767	0.632	0.222	1	Nip	LOC_Os01g37960
0.00696044	0.325597	0.316	0.056	1	Nip	LOC_Os02g33110
0.00697585	0.40669	0.263	0.028	1	Nip	LOC_Os02g13960
0.00697585	0.385547	0.263	0.028	1	Nip	LOC_Os03g26210
0.00697585	0.35161	0.263	0.028	1	Nip	LOC_Os02g45240
0.00697585	0.343361	0.263	0.028	1	Nip	LOC_Os05g15530
0.00697585	0.276183	0.263	0.028	1	Nip	LOC_Os07g28280
0.00697585	0.265984	0.263	0.028	1	Nip	LOC_Os03g49700
0.00697585	0.259944	0.263	0.028	1	Nip	LOC_Os04g37580
0.00697585	0.236163	0.263	0.028	1	Nip	LOC_Os09g28730
0.00697585	0.224927	0.263	0.028	1	Nip	LOC_Os08g20570
0.00697585	0.217353	0.263	0.028	1	Nip	LOC_Os12g41962
0.00697585	0.20486	0.263	0.028	1	Nip	LOC_Os03g02310
0.00698899	1.00698	0.368	0.083	1	Nip	LOC_Os12g01400
0.00705995	0.459248	0.474	0.139	1	Nip	LOC_Os02g37430
0.00731035	0.44136	1	1	1	Nip	LOC_Os01g67860
0.00731886	0.352667	0.421	0.111	1	Nip	LOC_Os12g07450
0.00734619	0.243893	0.632	0.222	1	Nip	LOC_Os02g54470
0.00745733	0.41478	0.895	0.5	1	Nip	LOC_Os01g16190
0.0075653	0.67273	0.474	0.139	1	Nip	LOC_Os03g55770
0.00761286	0.589195	0.947	0.694	1	Nip	LOC_Os02g39580
0.00767076	0.487279	0.632	0.306	1	Nip	LOC_Os05g46610
0.00769215	0.758853	0.263	0.028	1	Nip	LOC_Os06g35560
0.00769215	0.259833	0.263	0.028	1	Nip	LOC_Os06g41390
0.00769215	0.258972	0.263	0.028	1	Nip	LOC_Os11g47560
0.00769215	0.251503	0.263	0.028	1	Nip	LOC_Os02g15580
0.00769215	0.234403	0.263	0.028	1	Nip	LOC_Os08g41460
0.00769215	0.205203	0.263	0.028	1	Nip	LOC_Os06g04460
0.00771483	0.291214	1	0.889	1	Nip	LOC_Os02g41650
0.00773922	0.404606	0.579	0.194	1	Nip	LOC_Os06g19690
0.00787264	0.612957	0.421	0.111	1	Nip	LOC_Os03g05620
0.0079219	0.760783	0.947	0.611	1	Nip	LOC_Os01g09880
0.00805041	0.305965	0.789	0.333	1	Nip	LOC_Os09g33986
0.00820635	0.501703	0.789	0.5	1	Nip	LOC_Os08g43580
0.00826607	0.530832	0.316	0.056	1	Nip	LOC_Os01g52410
0.00826607	0.281962	0.316	0.056	1	Nip	LOC_Os04g29920
0.00832064	0.942387	0.737	0.417	1	Nip	LOC_Os07g38170
0.00837544	0.374307	0.526	0.167	1	Nip	LOC_Os01g50870
0.00841839	0.238817	0.421	0.083	1	Nip	LOC_Os05g46360
0.00846366	0.538368	0.421	0.111	1	Nip	LOC_Os09g07460
0.00846366	0.337882	0.421	0.111	1	Nip	LOC_Os04g37480
0.00846366	0.288638	0.421	0.111	1	Nip	LOC_Os03g58700
0.00847369	0.263069	0.263	0.028	1	Nip	LOC_Os08g04180
0.00853642	0.393338	1	0.833	1	Nip	LOC_Os06g43850
0.00856626	0.487866	1	0.889	1	Nip	LOC_Os06g39470
0.00860782	0.490255	0.684	0.306	1	Nip	LOC_Os09g36800
0.00883377	0.364884	0.368	0.083	1	Nip	LOC_Os02g19970
0.00893622	0.420218	0.526	0.167	1	Nip	LOC_Os05g06430
0.00899772	0.498711	0.316	0.056	1	Nip	LOC_Os02g57350
0.00899772	0.399293	0.316	0.056	1	Nip	LOC_Os03g60620
0.00899772	0.367461	0.316	0.056	1	Nip	LOC_Os07g47030
0.00899772	0.319286	0.316	0.056	1	Nip	LOC_Os08g37840
0.00900422	0.376864	0.947	0.5	1	Nip	LOC_Os07g48100
0.00916334	0.396634	0.474	0.167	1	Nip	LOC_Os06g11170
0.00928157	0.485266	0.474	0.139	1	Nip	LOC_Os11g35020
0.00932548	0.417839	0.263	0.028	1	Nip	LOC_Os03g61670
0.00932548	0.40538	0.263	0.028	1	Nip	LOC_Os01g62584
0.00932548	0.330667	0.263	0.028	1	Nip	LOC_Os02g13630
0.00932548	0.2877	0.263	0.028	1	Nip	LOC_Os06g37620
0.00932548	0.267454	0.263	0.028	1	Nip	LOC_Os01g52900
0.00932548	0.254458	0.263	0.028	1	Nip	LOC_Os08g38060
0.00932548	0.213873	0.263	0.028	1	Nip	LOC_Os03g19220
0.00949166	0.5813	0.789	0.583	1	Nip	LOC_Os02g52860
0.00953906	0.357448	0.368	0.083	1	Nip	LOC_Os02g41680
0.0095508	0.459061	0.737	0.389	1	Nip	LOC_Os07g46990
0.00959296	0.462118	0.421	0.139	1	Nip	LOC_Os03g43020
0.00964838	0.541402	0.684	0.306	1	Nip	LOC_Os03g27010
0.00967513	0.755682	0.632	0.306	1	Nip	LOC_Os03g60210
0.00976604	0.291018	0.421	0.111	1	Nip	LOC_Os06g45990
0.00978667	0.299866	0.316	0.056	1	Nip	LOC_Os01g60730
0.0098539	0.512445	0.947	0.778	1	Nip	LOC_Os06g39240
0.00992646	0.42061	0.474	0.139	1	Nip	LOC_Os01g59140
0.00992717	0.314193	0.579	0.194	1	Nip	LOC_Os05g08980
0.00997539	0.467364	0.579	0.222	1	Nip	LOC_Os02g13100
0.00997539	0.268535	0.579	0.222	1	Nip	LOC_Os09g02170
