# Supplementary material for: Cell Type-Specific Differentiation Between Indica and Japonica Rice Root Tip Responses to Different Environments Based on Single-Cell RNA Sequencing
Source: Front Genet. 2021 May 17;12:659500. doi: 10.3389/fgene.2021.659500 (PMC8166412; doi:10.3389/fgene.2021.659500)
Supplement: Supplementary file 13 [file Table_6.XLS]

## Sheet: Cortex
Supplementary table 6. Differential expression genes between indica and japonica rice varieties in cortex
p_val	avg_logFC	pct.1	pct.2	p_val_adj	cluster	gene
0	4.22402	1	0.002	0	9311	LOC_Os10g28170
0	3.84474	0.993	0	0	9311	LOC_Os12g36229
0	3.8299	0.889	0.189	0	9311	LOC_Os04g46820
0	3.36343	0.895	0	0	9311	LOC_Os02g48710
0	3.13839	0.999	0	0	9311	LOC_Os06g47239
0	3.07573	0.993	0	0	9311	LOC_Os01g68950
0	2.76786	0.996	0	0	9311	LOC_Os01g54734
0	2.64698	0.991	0	0	9311	LOC_Os04g42064
0	2.63539	0.975	0.505	0	9311	LOC_Os01g05064
0	2.58722	0.957	0	0	9311	LOC_Os11g10510
0	2.40225	0.624	0.084	0	9311	LOC_Os11g10590
0	2.39759	0.985	0	0	9311	LOC_Os01g09214
0	2.35604	0.893	0	0	9311	LOC_Os02g52150
0	2.17015	0.998	0.675	0	9311	LOC_Os02g35610
0	2.0984	0.901	0	0	9311	LOC_Os05g10656
0	2.01348	0.952	0	0	9311	LOC_Os04g37778
0	1.99655	0.812	0	0	9311	LOC_Os04g37769
0	1.98032	0.974	0.579	0	9311	LOC_Os11g41150
0	1.96277	0.924	0	0	9311	LOC_Os07g42390
0	1.9369	0.958	0	0	9311	LOC_Os02g12521
0	1.91926	0.673	0	0	9311	LOC_Os03g47059
0	1.9154	0.674	0	0	9311	LOC_Os06g05034
0	1.90882	0.687	0.152	0	9311	LOC_Os04g28250
0	1.87105	0.968	0.386	0	9311	LOC_Os07g12200
0	1.86885	0.952	0.536	0	9311	LOC_Os02g36530
0	1.84962	0.877	0	0	9311	LOC_Os10g34801
0	1.84197	0.963	0.515	0	9311	LOC_Os06g21410
0	1.82713	0.971	0.643	0	9311	LOC_Os11g41875
0	1.82708	0.787	0.151	0	9311	LOC_Os06g04889
0	1.80882	0.936	0	0	9311	LOC_Os01g58048
0	1.80031	0.826	0.265	0	9311	LOC_Os07g41340
0	1.76751	0.855	0.041	0	9311	LOC_Os02g37280
0	1.74012	0.938	0.18	0	9311	LOC_Os06g05410
0	1.72987	0.947	0.336	0	9311	LOC_Os01g28790
0	1.70592	0.658	0	0	9311	LOC_Os04g49249
0	1.66421	0.99	0.74	0	9311	LOC_Os07g44180
0	1.60691	0.863	0	0	9311	LOC_Os09g17574
0	1.59606	0.916	0.278	0	9311	LOC_Os01g70470
0	1.58739	0.9	0	0	9311	LOC_Os11g06340
0	1.57998	0.668	0	0	9311	LOC_Os08g05964
0	1.52091	0.993	0.915	0	9311	LOC_Os06g13190
0	1.50802	0.95	0.492	0	9311	LOC_Os04g58110
0	1.49164	0.739	0	0	9311	LOC_Os05g12481
0	1.47544	0.66	0.003	0	9311	LOC_Os10g02380
0	1.47352	0.943	0.393	0	9311	LOC_Os06g08564
0	1.46961	0.934	0.34	0	9311	LOC_Os01g52214
0	1.45579	0.956	0.594	0	9311	LOC_Os01g04330
0	1.45525	0.877	0.513	0	9311	LOC_Os03g56860
0	1.45237	0.822	0	0	9311	LOC_Os01g05949
0	1.44599	0.728	0.063	0	9311	LOC_Os07g38290
0	1.43094	0.444	0	0	9311	LOC_Os07g49116
0	1.41822	0.751	0.001	0	9311	LOC_Os02g08330
0	1.41741	0.915	0.422	0	9311	LOC_Os03g60080
0	1.41247	0.642	0	0	9311	EVM024455
0	1.40949	0.939	0.338	0	9311	LOC_Os02g08180
0	1.40813	0.682	0	0	9311	LOC_Os03g58464
0	1.40361	1	0.976	0	9311	LOC_Os07g39680
0	1.40262	0.766	0.271	0	9311	LOC_Os01g57570
0	1.35735	0.967	0.864	0	9311	LOC_Os04g52504
0	1.35537	0.625	0.154	0	9311	LOC_Os11g30910
0	1.35475	0.706	0	0	9311	LOC_Os02g43644
0	1.35339	0.894	0.384	0	9311	LOC_Os03g49600
0	1.32988	0.844	0.071	0	9311	LOC_Os01g64630
0	1.3021	0.866	0.197	0	9311	LOC_Os02g10070
0	1.29714	0.741	0.35	0	9311	LOC_Os02g53410
0	1.29236	0.42	0	0	9311	LOC_Os08g24200
0	1.27597	0.957	0.459	0	9311	LOC_Os05g14180
0	1.26728	0.926	0.534	0	9311	LOC_Os08g37370
0	1.24119	0.769	0	0	9311	LOC_Os10g26834
0	1.23507	0.779	0.129	0	9311	LOC_Os09g34020
0	1.23186	0.694	0.064	0	9311	LOC_Os01g22010
0	1.23113	0.708	0	0	9311	LOC_Os08g10504
0	1.21991	0.869	0.62	0	9311	LOC_Os01g58310
0	1.21159	0.739	0	0	9311	LOC_Os09g30412
0	1.20737	0.748	0.241	0	9311	LOC_Os05g30510
0	1.20545	0.618	0	0	9311	LOC_Os05g02310
0	1.20143	0.959	0.636	0	9311	LOC_Os08g44340
0	1.19721	0.315	0	0	9311	LOC_Os01g27609
0	1.19711	0.999	0.959	0	9311	LOC_Os05g05940
0	1.19662	0.654	0	0	9311	LOC_Os01g24280
0	1.19658	0.732	0.036	0	9311	LOC_Os10g04020
0	1.19077	0.768	0	0	9311	LOC_Os07g31300
0	1.18365	0.727	0	0	9311	LOC_Os01g40189
0	1.18258	0.745	0	0	9311	LOC_Os11g10045
0	1.18071	0.952	0.772	0	9311	LOC_Os11g10470
0	1.17308	0.815	0	0	9311	EVM035660
0	1.16674	0.803	0.158	0	9311	LOC_Os06g21550
0	1.16663	0.8	0.067	0	9311	LOC_Os02g48190
0	1.16376	0.987	0.877	0	9311	LOC_Os11g11970
0	1.1618	0.737	0	0	9311	LOC_Os08g13294
0	1.15244	0.786	0	0	9311	LOC_Os06g33904
0	1.14851	0.864	0.42	0	9311	LOC_Os06g39912
0	1.14481	0.762	0	0	9311	LOC_Os12g34389
0	1.1395	0.862	0.485	0	9311	LOC_Os03g52410
0	1.13368	0.781	0.037	0	9311	LOC_Os02g51500
0	1.1326	0.621	0.169	0	9311	LOC_Os01g52230
0	1.13103	0.727	0	0	9311	LOC_Os01g39923
0	1.12621	0.939	0.627	0	9311	LOC_Os06g46950
0	1.10333	0.584	0.127	0	9311	LOC_Os04g05650
0	1.10277	0.982	0.812	0	9311	LOC_Os01g46926
0	1.07454	0.565	0.007	0	9311	LOC_Os06g41940
0	1.07268	0.9	0.435	0	9311	LOC_Os11g02200
0	1.07222	0.628	0	0	9311	LOC_Os03g25164
0	1.06941	0.506	0	0	9311	LOC_Os10g38189
0	1.067	0.641	0.036	0	9311	LOC_Os02g32469
0	1.0628	0.622	0.109	0	9311	LOC_Os09g35010
0	1.0488	0.939	0.622	0	9311	LOC_Os02g37300
0	1.04638	0.774	0.124	0	9311	LOC_Os01g07760
0	1.03888	0.646	0	0	9311	LOC_Os07g23696
0	1.03819	0.656	0	0	9311	LOC_Os11g23824
0	1.03305	0.59	0	0	9311	LOC_Os11g46860
0	1.03252	0.298	0	0	9311	LOC_Os03g02771
0	1.02728	0.639	0.121	0	9311	LOC_Os08g44370
0	1.02705	0.812	0.277	0	9311	LOC_Os03g57900
0	1.0222	0.491	0	0	9311	LOC_Os11g12093
0	1.0216	0.712	0.192	0	9311	LOC_Os07g39210
0	1.01663	0.745	0.025	0	9311	LOC_Os09g36100
0	1.00745	0.735	0.13	0	9311	LOC_Os02g48210
0	1.006	0.69	0.284	0	9311	LOC_Os03g60540
0	1.00006	0.998	0.971	0	9311	LOC_Os02g06640
0	0.995041	0.713	0.052	0	9311	LOC_Os03g08050
0	0.988837	1	0.998	0	9311	LOC_Os03g30430
0	0.988109	0.828	0.362	0	9311	LOC_Os03g60090
0	0.98442	0.404	0	0	9311	LOC_Os05g10330
0	0.97311	0.608	0	0	9311	LOC_Os03g50969
0	0.963819	0.698	0.281	0	9311	LOC_Os05g32860
0	0.962197	0.624	0.107	0	9311	LOC_Os05g08370
0	0.961153	0.361	0	0	9311	LOC_Os03g35873
0	0.954921	0.68	0	0	9311	LOC_Os01g01704
0	0.95066	0.673	0.307	0	9311	LOC_Os10g38580
0	0.946527	0.495	0	0	9311	LOC_Os02g57354
0	0.940764	0.796	0.235	0	9311	LOC_Os01g65900
0	0.935351	0.611	0	0	9311	LOC_Os03g19049
0	0.929704	0.807	0.355	0	9311	LOC_Os01g46610
0	0.929505	0.669	0.036	0	9311	LOC_Os03g29350
0	0.926121	0.753	0.237	0	9311	LOC_Os08g02420
0	0.922094	0.758	0.227	0	9311	LOC_Os12g06870
0	0.921118	0.495	0.002	0	9311	LOC_Os07g39360
0	0.916912	0.538	0	0	9311	LOC_Os02g05329
0	0.910886	0.736	0.137	0	9311	LOC_Os09g38750
0	0.906036	0.752	0.329	0	9311	LOC_Os01g42380
0	0.903075	0.53	0.14	0	9311	LOC_Os11g08380
0	0.900578	0.319	0.01	0	9311	LOC_Os02g13660
0	0.899836	0.605	0	0	9311	LOC_Os08g20594
0	0.899292	0.601	0	0	9311	EVM019481
0	0.888096	0.666	0	0	9311	LOC_Os06g39902
0	0.888012	1	0.997	0	9311	LOC_Os03g40920
0	0.868373	0.967	0.821	0	9311	LOC_Os04g37710
0	0.867101	0.714	0.128	0	9311	LOC_Os06g43210
0	0.864252	0.625	0.097	0	9311	LOC_Os03g37090
0	0.863651	0.79	0.423	0	9311	LOC_Os05g02770
0	0.863624	0.406	0	0	9311	LOC_Os11g16296
0	0.861396	0.699	0.093	0	9311	LOC_Os07g07240
0	0.861074	0.993	0.956	0	9311	LOC_Os05g09580
0	0.859903	0.949	0.768	0	9311	LOC_Os03g51600
0	0.847877	0.677	0.134	0	9311	LOC_Os08g44820
0	0.829497	0.902	0.624	0	9311	LOC_Os02g52314
0	0.825532	0.565	0	0	9311	LOC_Os01g41124
0	0.823195	0.492	0	0	9311	LOC_Os04g52464
0	0.81823	0.788	0.363	0	9311	LOC_Os09g39550
0	0.816918	0.686	0.136	0	9311	LOC_Os02g47580
0	0.816718	0.616	0	0	9311	LOC_Os10g29559
0	0.814907	0.535	0.158	0	9311	LOC_Os07g48780
0	0.814238	0.508	0.005	0	9311	LOC_Os02g26770
0	0.813209	0.583	0	0	9311	EVM029068
0	0.81181	0.881	0.631	0	9311	LOC_Os12g32580
0	0.811316	0.971	0.831	0	9311	LOC_Os03g55980
0	0.805258	0.801	0.436	0	9311	LOC_Os05g41590
0	0.805003	0.719	0.3	0	9311	LOC_Os02g39400
0	0.790411	0.73	0.244	0	9311	LOC_Os09g13920
0	0.789666	0.491	0.052	0	9311	LOC_Os08g42590
0	0.78816	0.947	0.731	0	9311	LOC_Os05g03760
0	0.787645	0.81	0.439	0	9311	LOC_Os08g31280
0	0.768333	0.964	0.729	0	9311	LOC_Os07g37400
0	0.764521	0.605	0.159	0	9311	LOC_Os07g45260
0	0.763646	0.957	0.799	0	9311	LOC_Os01g72530
0	0.762656	0.88	0.556	0	9311	LOC_Os01g37800
0	0.758723	0.597	0.169	0	9311	LOC_Os10g38670
0	0.747213	0.709	0.341	0	9311	LOC_Os08g38220
0	0.744398	0.564	0	0	9311	LOC_Os02g10374
0	0.738201	0.505	0	0	9311	LOC_Os08g41210
0	0.73389	0.522	0	0	9311	LOC_Os05g40779
0	0.731894	0.501	0	0	9311	LOC_Os10g24006
0	0.72991	0.614	0.117	0	9311	LOC_Os01g43420
0	0.726695	0.887	0.614	0	9311	LOC_Os03g29240
0	0.717966	0.533	0.071	0	9311	LOC_Os05g44170
0	0.71708	0.488	0	0	9311	LOC_Os01g67824
0	0.715079	0.645	0.22	0	9311	LOC_Os01g51410
0	0.713525	0.479	0	0	9311	LOC_Os01g42016
0	0.703419	0.569	0.138	0	9311	LOC_Os05g01600
0	0.702413	0.498	0	0	9311	LOC_Os05g43245
0	0.697773	0.817	0.448	0	9311	LOC_Os07g32570
0	0.69311	0.678	0.227	0	9311	LOC_Os02g39790
0	0.689496	0.478	0.061	0	9311	LOC_Os03g55670
0	0.688703	0.857	0.535	0	9311	LOC_Os07g33270
0	0.688206	0.985	0.848	0	9311	LOC_Os01g07970
0	0.687786	0.435	0	0	9311	LOC_Os08g32170
0	0.684025	0.48	0.012	0	9311	LOC_Os03g22270
0	0.677134	0.486	0.065	0	9311	LOC_Os05g24010
0	0.675829	0.605	0.185	0	9311	LOC_Os12g32190
0	0.675764	0.957	0.828	0	9311	LOC_Os04g57200
0	0.675275	0.471	0	0	9311	LOC_Os10g34803
0	0.673629	0.521	0.099	0	9311	LOC_Os04g51940
0	0.672529	0.655	0.228	0	9311	LOC_Os04g42600
0	0.671216	0.781	0.426	0	9311	LOC_Os12g06780
0	0.669787	0.463	0	0	9311	LOC_Os05g08356
0	0.66951	0.94	0.745	0	9311	LOC_Os08g37444
0	0.66695	0.46	0	0	9311	LOC_Os09g30254
0	0.664117	0.475	0	0	9311	LOC_Os12g15884
0	0.662201	0.538	0.045	0	9311	LOC_Os04g42480
0	0.660632	0.46	0.073	0	9311	LOC_Os03g62480
0	0.660496	0.528	0.084	0	9311	LOC_Os11g41140
0	0.656914	0.611	0.184	0	9311	LOC_Os02g47570
0	0.652506	0.526	0.084	0	9311	LOC_Os06g49700
0	0.650436	0.614	0.142	0	9311	LOC_Os02g56560
0	0.648799	0.5	0	0	9311	LOC_Os09g07615
0	0.648634	0.588	0.126	0	9311	LOC_Os07g38970
0	0.642555	0.458	0	0	9311	LOC_Os05g01799
0	0.638068	0.389	0	0	9311	LOC_Os06g50420
0	0.636763	0.457	0.047	0	9311	LOC_Os01g56570
0	0.633743	0.936	0.762	0	9311	LOC_Os01g58150
0	0.633328	0.918	0.727	0	9311	LOC_Os09g20660
0	0.630935	0.717	0.331	0	9311	LOC_Os03g20949
0	0.627988	0.383	0	0	9311	LOC_Os10g39406
0	0.626962	0.513	0.046	0	9311	LOC_Os02g38080
0	0.620956	0.485	0.015	0	9311	LOC_Os01g66350
0	0.614151	0.998	0.979	0	9311	LOC_Os03g38520
0	0.600652	0.478	0.014	0	9311	LOC_Os01g56300
0	0.594349	0.988	0.963	0	9311	LOC_Os11g43900
0	0.593876	0.998	0.992	0	9311	LOC_Os06g02470
0	0.591258	0.54	0.08	0	9311	LOC_Os04g56800
0	0.588012	0.452	0	0	9311	LOC_Os01g57119
0	0.584853	0.335	0	0	9311	LOC_Os04g56044
0	0.58219	0.344	0	0	9311	LOC_Os04g51152
0	0.581603	0.405	0	0	9311	LOC_Os05g11005
0	0.580715	0.477	0.108	0	9311	LOC_Os10g28210
0	0.578878	0.462	0.028	0	9311	LOC_Os03g06620
0	0.577232	0.455	0.061	0	9311	LOC_Os01g09570
0	0.573635	0.42	0	0	9311	LOC_Os05g49270
0	0.566845	0.346	0	0	9311	LOC_Os01g43639
0	0.564836	0.291	0	0	9311	LOC_Os03g15084
0	0.562812	0.407	0.007	0	9311	LOC_Os02g53040
0	0.56159	0.374	0	0	9311	LOC_Os02g24579
0	0.561282	0.349	0	0	9311	LOC_Os01g64644
0	0.559762	0.477	0.111	0	9311	LOC_Os03g61330
0	0.549476	0.424	0.017	0	9311	LOC_Os05g04340
0	0.540711	0.4	0.006	0	9311	LOC_Os03g60950
0	0.540241	0.336	0.009	0	9311	LOC_Os09g16520
0	0.536571	0.397	0	0	9311	LOC_Os01g73011
0	0.534029	0.412	0.012	0	9311	LOC_Os04g50216
0	0.529764	0.393	0	0	9311	LOC_Os02g57919
0	0.526907	0.363	0	0	9311	LOC_Os08g16809
0	0.525334	0.342	0	0	9311	LOC_Os01g04619
0	0.516434	0.387	0.029	0	9311	LOC_Os06g12390
0	0.508388	0.414	0.053	0	9311	LOC_Os03g43400
0	0.505912	0.28	0	0	9311	LOC_Os06g35564
0	0.505857	0.42	0.022	0	9311	LOC_Os01g14860
0	0.505291	0.36	0.007	0	9311	LOC_Os10g25150
0	0.504446	0.416	0.017	0	9311	LOC_Os01g51420
0	0.502177	0.38	0.046	0	9311	LOC_Os01g72970
0	0.50194	0.38	0	0	9311	LOC_Os12g34045
0	0.501648	0.4	0	0	9311	LOC_Os02g34729
0	0.500538	0.299	0	0	9311	LOC_Os12g15932
0	0.498576	0.405	0.064	0	9311	LOC_Os07g47460
0	0.496616	0.334	0	0	9311	LOC_Os07g35180
0	0.496055	0.401	0.048	0	9311	LOC_Os01g49026
0	0.49353	0.463	0.079	0	9311	LOC_Os12g29340
0	0.489391	0.393	0	0	9311	EVM030255
0	0.489143	0.43	0.064	0	9311	LOC_Os02g25060
0	0.484065	0.358	0.025	0	9311	LOC_Os05g48570
0	0.482217	0.362	0.001	0	9311	LOC_Os09g08910
0	0.478475	0.395	0.026	0	9311	LOC_Os04g51950
0	0.475944	0.391	0.056	0	9311	LOC_Os02g30100
0	0.475646	0.431	0.061	0	9311	LOC_Os01g51280
0	0.474178	0.449	0.077	0	9311	LOC_Os03g29910
0	0.474133	0.288	0	0	9311	LOC_Os06g01879
0	0.473559	0.307	0.012	0	9311	LOC_Os01g72100
0	0.463248	1	0.994	0	9311	LOC_Os07g48244
0	0.456467	0.349	0	0	9311	EVM031447
0	0.455895	0.369	0.026	0	9311	LOC_Os06g44450
0	0.451862	0.381	0	0	9311	EVM014147
0	0.450872	0.265	0	0	9311	LOC_Os04g39994
0	0.448708	0.32	0.021	0	9311	LOC_Os03g25610
0	0.443501	0.354	0	0	9311	LOC_Os06g50818
0	0.438017	0.267	0	0	9311	LOC_Os04g44314
0	0.436535	0.298	0	0	9311	LOC_Os01g03136
0	0.434656	0.285	0	0	9311	LOC_Os06g48520
0	0.429409	0.307	0.011	0	9311	LOC_Os03g25030
0	0.424202	0.353	0.03	0	9311	LOC_Os02g07680
0	0.419711	0.33	0.013	0	9311	LOC_Os01g05810
0	0.417294	0.327	0	0	9311	LOC_Os08g38410
0	0.412545	0.269	0	0	9311	LOC_Os05g43629
0	0.410423	0.322	0.001	0	9311	LOC_Os02g56760
0	0.409308	0.326	0	0	9311	LOC_Os04g32043
0	0.406808	0.349	0.027	0	9311	LOC_Os11g05870
0	0.403723	0.31	0	0	9311	LOC_Os05g46845
0	0.402176	0.27	0	0	9311	EVM016332
0	0.390954	0.272	0	0	9311	LOC_Os01g34974
0	0.390109	0.274	0	0	9311	EVM036215
0	0.385857	0.302	0	0	9311	LOC_Os06g05464
0	0.375947	0.304	0	0	9311	EVM021700
0	0.373866	0.278	0	0	9311	LOC_Os01g48770
0	0.36656	0.265	0	0	9311	EVM020102
0	0.36507	0.3	0	0	9311	LOC_Os06g21854
0	0.360918	0.295	0	0	9311	LOC_Os09g38079
0	0.356168	0.291	0.008	0	9311	LOC_Os11g10070
0	0.333268	0.277	0	0	9311	LOC_Os06g48749
0	0.330244	0.274	0	0	9311	LOC_Os02g01360
0	0.328117	0.272	0	0	9311	LOC_Os06g40415
5.29807e-308	0.337155	0.265	0	1.37231e-303	9311	LOC_Os01g46709
9.06829e-307	0.501776	0.323	0.026	2.34887e-302	9311	LOC_Os09g39440
1.01377e-306	0.480253	0.477	0.112	2.62587e-302	9311	LOC_Os03g31230
3.86887e-306	0.335625	0.289	0.01	1.00211e-301	9311	LOC_Os02g47220
1.87623e-305	0.730835	0.496	0.14	4.85981e-301	9311	LOC_Os01g12464
2.83262e-305	0.31806	0.263	0	7.33706e-301	9311	LOC_Os01g26996
2.83263e-305	0.684305	0.263	0	7.33707e-301	9311	LOC_Os01g62113
2.98039e-305	0.355436	0.288	0.009	7.71981e-301	9311	LOC_Os03g21690
7.73974e-305	0.521875	0.965	0.884	2.00475e-300	9311	LOC_Os09g38740
9.16498e-305	0.587526	0.817	0.561	2.37391e-300	9311	LOC_Os06g49780
7.34967e-304	0.364339	1	1	1.90371e-299	9311	LOC_Os07g02340
1.73253e-301	0.70535	0.473	0.126	4.48759e-297	9311	LOC_Os03g28330
9.22166e-300	0.556857	0.545	0.18	2.38859e-295	9311	LOC_Os02g48670
2.76469e-299	0.406257	0.274	0.006	7.1611e-295	9311	LOC_Os04g57970
5.4956e-299	0.463831	0.449	0.105	1.42347e-294	9311	LOC_Os09g36450
2.7898e-298	0.421925	0.257	0	7.22614e-294	9311	LOC_Os08g37500
1.66224e-297	0.332747	0.257	0	4.30555e-293	9311	LOC_Os08g02905
6.16633e-296	0.348675	0.293	0.014	1.5972e-291	9311	LOC_Os01g03760
1.4349e-295	0.330298	0.255	0	3.71669e-291	9311	LOC_Os02g58324
8.52323e-295	0.337194	0.255	0	2.20769e-290	9311	LOC_Os01g02034
6.66467e-293	0.610289	0.988	0.926	1.72628e-288	9311	LOC_Os09g21710
1.05172e-291	0.388189	0.252	0	2.72418e-287	9311	LOC_Os06g15754
3.43465e-290	0.361461	0.286	0.013	8.89642e-286	9311	LOC_Os01g44050
1.45384e-289	0.509135	0.523	0.166	3.76573e-285	9311	LOC_Os04g49510
1.12684e-288	0.764439	0.992	0.942	2.91873e-284	9311	LOC_Os01g32670
1.41018e-288	0.487759	0.324	0.032	3.65265e-284	9311	LOC_Os06g07030
7.54106e-288	0.39506	0.249	0	1.95329e-283	9311	EVM019851
3.24366e-287	0.66725	0.468	0.129	8.40174e-283	9311	LOC_Os06g43810
4.87737e-286	0.349044	0.305	0.023	1.26334e-281	9311	LOC_Os07g43060
2.04981e-285	0.566617	0.904	0.715	5.30941e-281	9311	LOC_Os03g10510
5.16938e-284	0.506118	0.484	0.139	1.33897e-279	9311	LOC_Os01g13660
7.30563e-284	0.417866	1	1	1.8923e-279	9311	LOC_Os07g45320
6.59979e-283	0.348251	0.275	0.011	1.70948e-278	9311	LOC_Os03g31570
4.95552e-282	0.310347	0.257	0.005	1.28358e-277	9311	LOC_Os02g46660
6.21445e-281	0.335364	0.244	0	1.60967e-276	9311	LOC_Os03g42464
1.09216e-280	0.724064	0.725	0.401	2.82891e-276	9311	LOC_Os03g11060
5.31791e-280	0.567654	0.665	0.309	1.37745e-275	9311	LOC_Os01g06590
8.77151e-280	0.303396	0.243	0	2.272e-275	9311	LOC_Os03g19959
1.14394e-278	0.565196	0.478	0.144	2.96304e-274	9311	LOC_Os02g50174
1.57013e-278	0.395694	0.997	0.996	4.06694e-274	9311	LOC_Os08g06430
2.47857e-277	0.574801	0.816	0.54	6.42e-273	9311	LOC_Os04g53230
1.28688e-276	0.474748	0.306	0.026	3.33327e-272	9311	LOC_Os01g53350
2.04767e-276	0.70874	0.788	0.509	5.30388e-272	9311	LOC_Os07g42220
1.4166e-275	0.388545	0.239	0	3.66928e-271	9311	LOC_Os04g12960
8.57298e-275	0.688107	0.843	0.525	2.22057e-270	9311	LOC_Os08g31850
1.15271e-273	0.600385	0.964	0.852	2.98576e-269	9311	LOC_Os04g54210
1.60161e-272	0.280553	0.237	0	4.14848e-268	9311	LOC_Os05g07729
2.03355e-272	0.363661	0.352	0.05	5.2673e-268	9311	LOC_Os02g01240
1.8388e-270	0.648487	0.311	0.032	4.76287e-266	9311	LOC_Os04g52750
5.2525e-269	0.472786	0.977	0.933	1.3605e-264	9311	LOC_Os03g03770
5.98042e-269	0.688605	0.527	0.181	1.54905e-264	9311	LOC_Os01g61680
9.6791e-269	0.364768	0.32	0.036	2.50708e-264	9311	LOC_Os11g10760
1.0297e-268	0.286575	0.234	0	2.66712e-264	9311	LOC_Os03g09049
2.47177e-268	0.384974	0.234	0	6.40237e-264	9311	LOC_Os04g56417
5.93214e-268	0.301107	0.233	0	1.53654e-263	9311	LOC_Os02g04340
6.43275e-268	0.523741	0.74	0.43	1.66621e-263	9311	LOC_Os02g10720
7.01684e-267	0.288474	0.236	0.001	1.8175e-262	9311	LOC_Os11g06240
4.16323e-266	0.707567	0.619	0.27	1.07836e-261	9311	LOC_Os06g05440
1.36929e-265	0.303102	0.256	0.009	3.54674e-261	9311	LOC_Os09g32620
3.01355e-264	0.593999	0.485	0.142	7.80571e-260	9311	LOC_Os06g37560
2.28261e-263	0.396554	0.257	0.01	5.91242e-259	9311	LOC_Os08g33750
2.60703e-263	0.553342	0.536	0.19	6.75273e-259	9311	LOC_Os12g39640
1.75765e-262	0.56094	0.933	0.826	4.55266e-258	9311	LOC_Os01g58220
2.91746e-262	0.463653	0.229	0	7.5568e-258	9311	LOC_Os09g25749
3.98872e-261	0.314295	0.228	0	1.03316e-256	9311	LOC_Os06g17076
8.32659e-261	0.759899	0.659	0.307	2.15675e-256	9311	LOC_Os02g15290
9.53357e-261	0.269564	0.228	0	2.46939e-256	9311	LOC_Os03g46219
1.63916e-260	0.784737	0.386	0.077	4.24574e-256	9311	LOC_Os01g72150
1.6577e-259	0.526335	0.982	0.937	4.29376e-255	9311	LOC_Os04g58890
2.94716e-259	0.303083	0.229	0.001	7.63372e-255	9311	LOC_Os01g53800
4.05323e-259	0.561073	0.711	0.365	1.04987e-254	9311	LOC_Os08g34240
1.7694e-258	0.263457	0.226	0	4.58311e-254	9311	LOC_Os12g12334
5.51638e-258	0.61745	0.593	0.236	1.42885e-253	9311	LOC_Os02g09990
5.73245e-257	0.333363	0.224	0	1.48482e-252	9311	LOC_Os10g38562
4.80687e-255	0.654962	0.854	0.639	1.24508e-250	9311	LOC_Os01g47690
6.87214e-254	0.403003	0.348	0.057	1.78002e-249	9311	LOC_Os08g33720
2.71461e-251	0.375817	0.329	0.051	7.03137e-247	9311	LOC_Os06g17390
3.86552e-251	0.269811	0.223	0.001	1.00125e-246	9311	LOC_Os02g09920
1.69731e-250	0.377198	0.992	0.978	4.39638e-246	9311	LOC_Os04g02670
3.7208e-250	0.395429	0.382	0.08	9.63762e-246	9311	LOC_Os12g08280
4.08975e-250	0.406045	0.4	0.088	1.05933e-245	9311	LOC_Os10g20250
4.58097e-249	0.563169	0.963	0.895	1.18656e-244	9311	LOC_Os05g11900
6.31576e-249	0.577484	0.667	0.328	1.63591e-244	9311	LOC_Os08g43270
1.09529e-248	0.284646	0.218	0	2.83703e-244	9311	LOC_Os04g55250
1.09529e-248	0.276447	0.218	0	2.83703e-244	9311	EVM035742
1.80082e-248	0.792446	0.844	0.651	4.66448e-244	9311	LOC_Os09g25760
1.48132e-246	0.413773	0.366	0.07	3.83691e-242	9311	LOC_Os03g05160
1.9509e-246	0.341565	0.216	0	5.05323e-242	9311	LOC_Os11g15154
1.07319e-244	0.369594	0.334	0.053	2.77978e-240	9311	LOC_Os06g07580
2.74938e-244	0.346869	0.317	0.045	7.12145e-240	9311	LOC_Os01g12800
3.8924e-244	0.599116	0.926	0.763	1.00821e-239	9311	LOC_Os10g38740
8.16293e-244	0.253931	0.214	0	2.11436e-239	9311	EVM001637
1.44752e-243	0.284602	0.258	0.016	3.74937e-239	9311	LOC_Os12g41700
1.08145e-242	0.265274	0.213	0	2.80117e-238	9311	LOC_Os05g43059
6.04856e-242	0.287052	0.212	0	1.5667e-237	9311	LOC_Os12g34012
7.98781e-241	0.261544	0.211	0	2.069e-236	9311	LOC_Os07g39740
9.00693e-240	0.513433	0.504	0.177	2.33298e-235	9311	LOC_Os06g37364
2.37775e-239	0.59495	0.998	0.989	6.15885e-235	9311	LOC_Os07g30970
3.23595e-239	0.782099	0.93	0.75	8.38177e-235	9311	LOC_Os09g31080
5.46047e-239	0.534665	0.923	0.757	1.41437e-234	9311	LOC_Os04g53620
5.85301e-238	0.609951	0.823	0.525	1.51605e-233	9311	LOC_Os05g02760
1.77443e-237	0.448131	0.456	0.143	4.59612e-233	9311	LOC_Os12g25210
3.92306e-237	0.336045	0.313	0.045	1.01615e-232	9311	LOC_Os10g20240
6.39058e-237	0.270336	0.231	0.008	1.65529e-232	9311	LOC_Os03g22740
2.38361e-236	0.263405	0.208	0	6.17404e-232	9311	LOC_Os03g03119
4.77e-236	0.289292	0.275	0.026	1.23553e-231	9311	LOC_Os04g30910
3.11794e-235	0.564528	0.207	0	8.07609e-231	9311	LOC_Os04g34600
7.34336e-235	0.301826	0.207	0	1.90208e-230	9311	LOC_Os01g66840
2.19679e-234	0.54264	0.693	0.403	5.69014e-230	9311	LOC_Os08g16559
9.5813e-234	0.277056	0.206	0	2.48175e-229	9311	LOC_Os11g42989
5.72519e-233	0.480322	0.515	0.193	1.48294e-228	9311	LOC_Os02g36340
7.90932e-232	0.505428	0.69	0.407	2.04867e-227	9311	LOC_Os08g15170
7.9629e-232	0.514196	0.783	0.518	2.06255e-227	9311	LOC_Os01g43370
8.11293e-232	0.375457	0.289	0.035	2.10141e-227	9311	LOC_Os02g40900
1.62184e-231	0.533482	0.204	0	4.20088e-227	9311	LOC_Os01g42864
5.06345e-231	0.719983	0.95	0.83	1.31154e-226	9311	LOC_Os02g03710
2.10407e-230	0.256527	0.203	0	5.44997e-226	9311	LOC_Os01g25274
2.11267e-230	0.321141	0.3	0.043	5.47223e-226	9311	LOC_Os10g34270
9.78605e-230	0.267166	0.215	0.004	2.53478e-225	9311	LOC_Os02g48340
1.64668e-229	0.432025	0.982	0.942	4.26523e-225	9311	LOC_Os11g06890
2.72452e-229	0.255931	0.202	0	7.05706e-225	9311	EVM022699
6.39515e-229	0.245761	0.202	0	1.65647e-224	9311	LOC_Os05g42992
4.54236e-227	0.243923	0.2	0	1.17656e-222	9311	LOC_Os10g02936
3.73511e-226	0.435486	0.468	0.154	9.67469e-222	9311	LOC_Os09g21230
4.27077e-226	0.662249	0.705	0.429	1.10621e-221	9311	LOC_Os03g01910
1.46558e-225	0.353423	0.364	0.08	3.79614e-221	9311	LOC_Os01g02334
1.56573e-225	0.403062	0.409	0.118	4.05555e-221	9311	LOC_Os08g45220
1.08405e-224	0.455024	0.479	0.175	2.8079e-220	9311	LOC_Os03g08020
1.06679e-223	0.476866	0.569	0.242	2.7632e-219	9311	LOC_Os07g47350
1.38421e-223	0.495417	0.721	0.452	3.58537e-219	9311	LOC_Os01g57260
3.9671e-223	0.390533	0.403	0.106	1.02756e-218	9311	LOC_Os08g01290
5.2771e-223	0.235049	0.197	0	1.36687e-218	9311	LOC_Os06g08005
1.23425e-222	0.254096	0.197	0	3.19696e-218	9311	LOC_Os12g01030
6.74759e-222	0.2685	0.196	0	1.74776e-217	9311	LOC_Os03g43989
1.87452e-221	0.48747	0.616	0.286	4.85537e-217	9311	LOC_Os05g50810
2.61199e-221	0.379583	0.392	0.099	6.76558e-217	9311	LOC_Os06g03682
3.48668e-221	0.478635	0.399	0.108	9.03119e-217	9311	LOC_Os08g34720
3.68578e-221	0.305561	0.195	0	9.54692e-217	9311	LOC_Os03g40069
1.03644e-220	0.373518	0.349	0.074	2.68458e-216	9311	LOC_Os06g40120
1.9228e-220	0.235492	0.204	0.003	4.98042e-216	9311	LOC_Os11g01510
2.01162e-220	0.31891	0.195	0	5.21051e-216	9311	LOC_Os07g44850
2.30266e-220	0.283938	0.254	0.024	5.96434e-216	9311	LOC_Os03g55389
3.37602e-220	0.506186	0.972	0.892	8.74456e-216	9311	LOC_Os06g11130
5.10521e-220	0.260931	0.21	0.006	1.32235e-215	9311	LOC_Os06g44890
1.39476e-218	0.224797	0.193	0	3.61271e-214	9311	LOC_Os09g35560
2.22309e-218	0.391251	0.978	0.959	5.75824e-214	9311	LOC_Os08g42000
7.59005e-218	0.226878	0.193	0	1.96597e-213	9311	LOC_Os07g10246
1.49797e-217	0.538421	0.566	0.223	3.88004e-213	9311	LOC_Os05g04470
2.99251e-217	0.390951	0.998	0.995	7.75119e-213	9311	LOC_Os05g40300
4.12693e-217	0.245073	0.192	0	1.06896e-212	9311	LOC_Os08g06344
4.12693e-217	0.383424	0.192	0	1.06896e-212	9311	LOC_Os04g13332
5.47177e-217	0.569763	0.976	0.877	1.4173e-212	9311	LOC_Os06g46970
5.56191e-217	0.335422	0.32	0.058	1.44065e-212	9311	LOC_Os02g25580
2.39876e-216	0.45938	0.999	1	6.21326e-212	9311	LOC_Os06g05880
3.62158e-216	0.453798	0.334	0.067	9.38063e-212	9311	LOC_Os02g50340
5.22421e-216	0.255711	0.191	0	1.35318e-211	9311	LOC_Os01g33204
2.97684e-215	0.343079	0.298	0.046	7.71062e-211	9311	LOC_Os02g52620
6.85438e-215	0.282895	0.239	0.019	1.77542e-210	9311	LOC_Os01g43410
9.15566e-215	0.379486	0.397	0.108	2.3715e-210	9311	LOC_Os03g59170
1.62475e-213	0.350391	0.341	0.071	4.20843e-209	9311	LOC_Os03g62280
1.93688e-213	0.266227	0.189	0	5.01691e-209	9311	LOC_Os04g17664
4.4276e-213	0.648544	0.877	0.721	1.14684e-208	9311	LOC_Os03g15940
1.98837e-212	0.544474	0.373	0.092	5.15028e-208	9311	LOC_Os02g57720
3.68193e-212	0.348445	0.203	0.005	9.53693e-208	9311	LOC_Os01g12570
7.10811e-211	0.406054	0.187	0	1.84114e-206	9311	LOC_Os08g16827
1.65109e-210	0.312423	0.187	0	4.27666e-206	9311	LOC_Os04g55709
1.99229e-210	0.559305	0.681	0.402	5.16044e-206	9311	LOC_Os07g44610
2.3231e-209	0.655646	0.899	0.664	6.0173e-205	9311	LOC_Os01g19020
2.55645e-209	0.363525	0.365	0.091	6.62173e-205	9311	LOC_Os06g35410
3.38879e-209	0.489584	0.813	0.538	8.77763e-205	9311	LOC_Os09g21210
5.47705e-209	0.860001	0.814	0.636	1.41867e-204	9311	LOC_Os12g40180
6.23586e-209	0.393421	0.233	0.018	1.61521e-204	9311	LOC_Os04g53606
8.36362e-209	0.342157	0.338	0.071	2.16634e-204	9311	LOC_Os09g34280
1.88177e-208	0.451877	0.598	0.289	4.87416e-204	9311	LOC_Os02g57650
1.38888e-207	0.36307	0.184	0	3.59747e-203	9311	LOC_Os11g19871
1.38888e-207	0.2292	0.184	0	3.59747e-203	9311	LOC_Os08g03584
3.22011e-207	0.242337	0.184	0	8.34073e-203	9311	LOC_Os09g13664
2.38373e-206	0.306622	0.231	0.018	6.17433e-202	9311	LOC_Os04g53760
7.55626e-206	0.44849	0.346	0.078	1.95722e-201	9311	LOC_Os05g41380
1.15291e-204	0.227098	0.182	0	2.98626e-200	9311	LOC_Os02g38386
2.66859e-204	0.223543	0.181	0	6.91218e-200	9311	LOC_Os03g36931
3.83362e-204	0.539971	0.412	0.134	9.92983e-200	9311	LOC_Os01g64790
6.17559e-204	0.291289	0.181	0	1.5996e-199	9311	LOC_Os03g64264
6.17559e-204	0.326734	0.181	0	1.5996e-199	9311	LOC_Os10g38540
1.8595e-203	0.285493	0.27	0.037	4.81648e-199	9311	LOC_Os05g04850
3.1741e-203	0.456774	0.415	0.126	8.22155e-199	9311	LOC_Os03g41390
1.85218e-202	0.581593	0.511	0.201	4.79753e-198	9311	LOC_Os11g30290
3.432e-202	0.29967	0.308	0.057	8.88956e-198	9311	LOC_Os05g43790
9.44441e-202	0.221956	0.179	0	2.44629e-197	9311	LOC_Os09g38838
2.18245e-201	0.223661	0.179	0	5.65298e-197	9311	LOC_Os04g31619
1.04666e-200	0.215235	0.186	0.003	2.71105e-196	9311	LOC_Os09g39462
2.57711e-200	0.268024	0.245	0.028	6.67524e-196	9311	LOC_Os02g48680
2.68975e-200	0.231877	0.178	0	6.967e-196	9311	LOC_Os04g50950
2.87035e-200	0.227958	0.191	0.005	7.43479e-196	9311	LOC_Os07g06130
4.29608e-200	0.378901	0.441	0.146	1.11277e-195	9311	LOC_Os05g43570
2.60823e-199	0.316184	0.309	0.059	6.75583e-195	9311	LOC_Os12g39970
3.30884e-199	0.224978	0.177	0	8.57055e-195	9311	LOC_Os01g61789
7.63515e-199	0.214556	0.177	0	1.97766e-194	9311	LOC_Os04g43534
8.66849e-199	0.527551	0.752	0.509	2.24531e-194	9311	LOC_Os10g35630
3.18593e-198	0.223881	0.182	0.002	8.25219e-194	9311	LOC_Os10g40390
1.1476e-196	0.278764	0.175	0	2.97252e-192	9311	LOC_Os04g49660
1.93835e-196	0.455188	0.878	0.683	5.02072e-192	9311	LOC_Os05g27930
2.8873e-196	0.50201	0.485	0.179	7.47868e-192	9311	LOC_Os09g36950
4.2935e-196	0.537616	0.677	0.394	1.1121e-191	9311	LOC_Os03g10620
1.53076e-195	0.491447	0.568	0.234	3.96497e-191	9311	LOC_Os11g05614
2.20235e-194	0.480096	0.99	0.95	5.70453e-190	9311	LOC_Os05g04510
3.94032e-194	0.202107	0.173	0	1.02062e-189	9311	LOC_Os06g15689
2.02006e-193	0.641576	0.58	0.271	5.23236e-189	9311	LOC_Os01g17330
4.06422e-193	0.327911	0.314	0.066	1.05271e-188	9311	LOC_Os03g02160
4.79667e-193	0.203478	0.172	0	1.24243e-188	9311	LOC_Os02g05245
4.79667e-193	0.202073	0.172	0	1.24243e-188	9311	LOC_Os08g05934
1.24459e-192	0.513371	0.407	0.14	3.22373e-188	9311	LOC_Os06g06980
2.53571e-192	0.213604	0.171	0	6.568e-188	9311	LOC_Os06g43169
2.53571e-192	0.218274	0.171	0	6.568e-188	9311	LOC_Os03g22919
2.53571e-192	0.214626	0.171	0	6.568e-188	9311	LOC_Os07g37454
2.53571e-192	0.214804	0.171	0	6.568e-188	9311	LOC_Os02g05659
3.91585e-192	0.27992	0.262	0.038	1.01428e-187	9311	LOC_Os09g32040
1.33938e-191	0.218089	0.171	0	3.46926e-187	9311	LOC_Os03g62808
1.83035e-191	0.441031	0.276	0.05	4.74097e-187	9311	LOC_Os04g40630
2.15483e-191	0.493149	0.767	0.502	5.58144e-187	9311	LOC_Os02g12480
3.58236e-191	0.366896	0.423	0.14	9.27903e-187	9311	LOC_Os03g52760
5.80132e-191	0.279665	0.274	0.045	1.50266e-186	9311	LOC_Os05g28480
7.06891e-191	0.213964	0.17	0	1.83099e-186	9311	LOC_Os10g26734
1.09171e-190	0.402987	0.24	0.029	2.82775e-186	9311	LOC_Os01g01870
2.58322e-190	0.550711	0.337	0.085	6.69106e-186	9311	LOC_Os06g41600
4.57738e-190	0.269573	0.195	0.009	1.18563e-185	9311	LOC_Os03g18400
7.8208e-189	0.318023	0.226	0.023	2.02574e-184	9311	LOC_Os01g07890
1.33353e-188	0.387187	0.481	0.189	3.4541e-184	9311	LOC_Os08g37690
7.64199e-188	0.250329	0.212	0.016	1.97943e-183	9311	LOC_Os05g11140
1.2473e-187	0.290334	0.167	0	3.23076e-183	9311	LOC_Os01g61849
1.54157e-187	0.980147	0.342	0.088	3.99297e-183	9311	LOC_Os08g24300
2.85932e-187	0.212683	0.167	0	7.4062e-183	9311	EVM020728
2.68598e-186	0.315097	0.297	0.06	6.95724e-182	9311	LOC_Os08g15840
5.19849e-186	0.232669	0.197	0.011	1.34651e-181	9311	LOC_Os03g30220
1.12761e-185	0.271816	0.252	0.037	2.92074e-181	9311	LOC_Os07g31850
1.24398e-185	0.239579	0.213	0.018	3.22216e-181	9311	LOC_Os04g33080
7.63512e-185	0.476728	0.401	0.128	1.97765e-180	9311	LOC_Os08g35600
9.4585e-185	0.234569	0.165	0	2.44994e-180	9311	LOC_Os08g18829
1.16138e-184	0.815897	0.358	0.101	3.0082e-180	9311	LOC_Os08g39300
2.16474e-184	0.201791	0.165	0	5.6071e-180	9311	LOC_Os07g44004
2.15094e-183	0.407907	0.448	0.178	5.57137e-179	9311	LOC_Os04g45910
3.53922e-183	0.457317	0.673	0.391	9.16728e-179	9311	LOC_Os06g41770
5.55503e-183	0.454893	0.973	0.897	1.43886e-178	9311	LOC_Os04g30420
5.92724e-183	0.20221	0.163	0	1.53527e-178	9311	LOC_Os07g44290
2.79272e-182	0.504669	0.837	0.667	7.2337e-178	9311	LOC_Os04g21950
9.9531e-182	0.526334	0.956	0.842	2.57805e-177	9311	LOC_Os12g02040
1.61766e-181	0.270956	0.162	0	4.19005e-177	9311	LOC_Os06g08014
3.69551e-181	0.219582	0.162	0	9.5721e-177	9311	LOC_Os11g44674
2.26253e-180	0.221445	0.19	0.01	5.86041e-176	9311	LOC_Os10g35670
7.1511e-180	0.393002	0.414	0.14	1.85228e-175	9311	LOC_Os01g55340
6.51634e-179	0.371262	0.396	0.139	1.68786e-174	9311	LOC_Os11g38990
3.84938e-178	0.505716	0.632	0.34	9.97066e-174	9311	LOC_Os04g52370
2.20518e-176	0.846873	0.786	0.496	5.71185e-172	9311	LOC_Os03g16020
2.20831e-176	0.379629	0.419	0.15	5.71997e-172	9311	LOC_Os07g41810
1.58235e-175	0.327409	0.358	0.103	4.0986e-171	9311	LOC_Os02g58560
6.80693e-175	0.476354	0.482	0.212	1.76313e-170	9311	LOC_Os08g31510
1.02515e-174	0.202639	0.156	0	2.65533e-170	9311	LOC_Os04g48856
1.06214e-174	0.303303	0.209	0.021	2.75116e-170	9311	LOC_Os06g37070
1.2267e-174	0.451677	0.673	0.394	3.17741e-170	9311	LOC_Os01g41010
1.77416e-174	0.224032	0.205	0.018	4.59543e-170	9311	LOC_Os03g57680
2.45685e-174	0.279039	1	1	6.36374e-170	9311	LOC_Os05g34770
2.7575e-174	0.310239	0.999	0.998	7.14249e-170	9311	LOC_Os01g25540
3.22026e-174	0.337065	0.999	0.997	8.34112e-170	9311	LOC_Os04g57220
9.32069e-174	0.926236	0.783	0.644	2.41424e-169	9311	LOC_Os06g05510
2.37e-173	0.371363	0.938	0.836	6.13877e-169	9311	LOC_Os06g17870
4.5612e-173	0.344726	0.995	0.987	1.18144e-168	9311	LOC_Os05g03150
6.49631e-173	0.246679	0.213	0.022	1.68267e-168	9311	LOC_Os03g07370
3.17858e-171	0.26989	0.202	0.018	8.23317e-167	9311	LOC_Os05g43300
4.74328e-171	0.355634	0.974	0.936	1.22861e-166	9311	LOC_Os03g27310
2.3829e-170	0.271776	0.242	0.037	6.17218e-166	9311	LOC_Os03g21620
2.54042e-169	0.423156	0.704	0.44	6.58018e-165	9311	LOC_Os04g53190
2.98078e-169	0.292863	0.25	0.041	7.72082e-165	9311	LOC_Os12g38650
1.00292e-167	0.290359	0.294	0.069	2.59776e-163	9311	LOC_Os01g69980
3.66649e-167	0.273735	0.999	0.997	9.49695e-163	9311	LOC_Os03g56190
1.38637e-166	0.320221	0.259	0.049	3.59098e-162	9311	LOC_Os04g49620
1.71943e-166	0.234236	0.195	0.017	4.45368e-162	9311	LOC_Os05g05270
2.8587e-166	0.326782	0.349	0.102	7.40461e-162	9311	LOC_Os02g55080
1.38406e-165	0.205612	0.188	0.014	3.585e-161	9311	LOC_Os12g04020
1.1996e-164	0.378563	0.495	0.226	3.10721e-160	9311	LOC_Os02g51414
1.76576e-164	0.322958	0.385	0.132	4.57368e-160	9311	LOC_Os04g51780
2.30359e-164	0.23493	0.206	0.023	5.96675e-160	9311	LOC_Os01g39330
2.71511e-164	0.218389	0.156	0.003	7.03268e-160	9311	LOC_Os04g40874
4.95558e-164	0.433635	0.775	0.535	1.28359e-159	9311	LOC_Os01g38980
1.04116e-163	0.286777	0.319	0.084	2.6968e-159	9311	LOC_Os04g48730
2.42191e-163	0.373378	0.966	0.888	6.27323e-159	9311	LOC_Os01g17190
1.89255e-162	0.221808	0.16	0.005	4.90209e-158	9311	LOC_Os07g13800
2.0908e-162	0.264865	0.193	0.018	5.41558e-158	9311	LOC_Os04g51460
2.86921e-162	0.218614	0.146	0	7.43183e-158	9311	LOC_Os01g43729
6.15136e-162	0.343043	0.997	0.99	1.59332e-157	9311	LOC_Os02g39850
3.13151e-161	0.402277	0.714	0.503	8.11124e-157	9311	LOC_Os10g42540
5.01072e-161	0.41291	0.994	0.958	1.29788e-156	9311	LOC_Os02g41630
1.61942e-160	0.215107	0.168	0.008	4.19462e-156	9311	LOC_Os02g39390
4.49018e-160	0.209451	0.165	0.007	1.16305e-155	9311	LOC_Os11g12420
2.33127e-159	0.442544	0.755	0.533	6.03844e-155	9311	LOC_Os01g56930
3.55169e-159	0.310208	0.302	0.076	9.19959e-155	9311	LOC_Os04g38914
5.60917e-159	0.222976	0.194	0.02	1.45289e-154	9311	LOC_Os02g27400
1.12942e-158	0.273991	0.294	0.071	2.92543e-154	9311	LOC_Os09g32240
1.04673e-157	0.242209	0.147	0.002	2.71125e-153	9311	LOC_Os02g54530
2.03131e-157	0.341433	0.416	0.162	5.26149e-153	9311	LOC_Os03g07300
3.08653e-157	0.334208	0.284	0.069	7.99474e-153	9311	LOC_Os09g27030
4.26077e-157	0.414301	0.952	0.879	1.10363e-152	9311	LOC_Os04g42090
5.74815e-157	0.280971	0.141	0	1.48889e-152	9311	LOC_Os01g48714
6.2996e-157	0.280996	0.258	0.052	1.63172e-152	9311	LOC_Os01g62840
1.19689e-156	0.255358	0.273	0.06	3.10018e-152	9311	LOC_Os06g50146
2.91714e-156	0.21958	0.141	0	7.55598e-152	9311	LOC_Os03g28796
3.95807e-156	0.356857	0.406	0.164	1.02522e-151	9311	LOC_Os03g01810
7.37503e-156	0.441308	0.838	0.688	1.91028e-151	9311	LOC_Os03g59710
1.23328e-155	0.423269	0.541	0.291	3.19445e-151	9311	LOC_Os05g41670
3.04509e-155	0.600175	0.525	0.261	7.88739e-151	9311	LOC_Os01g54340
1.28017e-154	0.322744	0.364	0.119	3.31588e-150	9311	LOC_Os06g50870
1.42791e-153	0.353938	0.233	0.04	3.69856e-149	9311	LOC_Os02g52540
5.94973e-153	0.409658	0.392	0.146	1.5411e-148	9311	LOC_Os06g46284
3.23495e-152	0.205355	0.179	0.015	8.37916e-148	9311	LOC_Os09g02400
6.81907e-152	0.442162	0.306	0.083	1.76628e-147	9311	LOC_Os01g51870
1.32311e-150	0.249464	0.262	0.058	3.42713e-146	9311	LOC_Os03g62250
1.552e-150	0.361748	0.348	0.114	4.02e-146	9311	LOC_Os10g37350
7.61141e-150	0.437717	0.762	0.55	1.97151e-145	9311	LOC_Os03g19720
7.0978e-149	0.317245	0.134	0	1.83847e-144	9311	EVM018052
9.58784e-149	0.469363	0.864	0.763	2.48344e-144	9311	LOC_Os06g45060
2.14021e-148	0.417608	0.557	0.275	5.54357e-144	9311	LOC_Os03g10050
2.28357e-147	0.401516	0.495	0.247	5.9149e-143	9311	LOC_Os10g42190
2.43496e-147	0.390936	0.416	0.182	6.30705e-143	9311	LOC_Os07g12170
5.00658e-147	0.501547	0.545	0.279	1.2968e-142	9311	LOC_Os02g37180
1.10418e-146	0.39276	0.558	0.294	2.86005e-142	9311	LOC_Os05g19970
1.19692e-146	0.455495	0.496	0.235	3.10027e-142	9311	LOC_Os04g33990
6.49974e-146	0.567896	0.922	0.782	1.68356e-141	9311	LOC_Os08g06550
3.2431e-145	0.288109	0.261	0.061	8.40027e-141	9311	LOC_Os03g04110
1.29331e-144	0.354792	0.992	0.979	3.34992e-140	9311	LOC_Os05g41060
2.53811e-144	0.291532	0.13	0	6.57421e-140	9311	LOC_Os03g22010
3.44032e-144	0.440191	0.771	0.538	8.91111e-140	9311	LOC_Os12g23280
4.7841e-144	0.231186	0.188	0.023	1.23918e-139	9311	LOC_Os11g04320
6.82606e-144	0.247192	0.251	0.054	1.76809e-139	9311	LOC_Os03g60130
1.01735e-143	0.27003	0.272	0.067	2.63514e-139	9311	LOC_Os01g72940
1.81252e-143	0.203961	0.174	0.016	4.69478e-139	9311	LOC_Os03g49430
4.36215e-143	0.58039	0.809	0.591	1.12988e-138	9311	LOC_Os12g40900
1.19185e-142	0.331746	0.392	0.151	3.08714e-138	9311	LOC_Os01g12910
1.32872e-142	0.349685	0.205	0.031	3.44164e-138	9311	LOC_Os01g48360
2.17676e-141	0.324337	0.3	0.089	5.63825e-137	9311	LOC_Os12g43620
3.77326e-141	0.298128	0.283	0.076	9.77351e-137	9311	LOC_Os09g30360
4.18769e-141	0.350094	0.415	0.179	1.08469e-136	9311	LOC_Os07g42890
1.28079e-140	0.418784	0.438	0.192	3.3175e-136	9311	LOC_Os11g07580
4.46251e-140	0.305383	0.33	0.11	1.15588e-135	9311	LOC_Os05g32380
5.93026e-140	0.358505	0.591	0.344	1.53606e-135	9311	LOC_Os01g48760
1.31041e-138	0.255312	0.242	0.051	3.39422e-134	9311	LOC_Os06g05450
2.10629e-138	0.424272	0.258	0.063	5.45572e-134	9311	LOC_Os12g21760
3.34022e-138	0.335319	0.31	0.096	8.65183e-134	9311	LOC_Os10g40550
3.5012e-138	0.216348	0.166	0.016	9.0688e-134	9311	LOC_Os08g41320
1.35121e-137	0.378038	0.422	0.174	3.4999e-133	9311	LOC_Os09g09930
2.16776e-137	0.222334	0.213	0.039	5.61494e-133	9311	LOC_Os10g35960
4.28382e-137	0.3341	0.342	0.121	1.1096e-132	9311	LOC_Os02g43900
1.41602e-136	0.376145	0.679	0.433	3.66777e-132	9311	LOC_Os04g38525
1.94125e-136	0.261722	1	1	5.02824e-132	9311	LOC_Os12g37419
2.16779e-136	0.608619	0.958	0.842	5.61501e-132	9311	LOC_Os04g46810
2.55649e-136	0.686728	0.82	0.588	6.62183e-132	9311	LOC_Os01g72009
4.55902e-136	0.530864	0.668	0.476	1.18088e-131	9311	LOC_Os09g39400
1.31957e-135	0.325102	0.123	0	3.41794e-131	9311	LOC_Os05g13934
1.49542e-135	0.42123	0.58	0.332	3.87343e-131	9311	LOC_Os05g24550
2.16992e-135	0.30167	0.99	0.98	5.62054e-131	9311	LOC_Os09g07920
2.25123e-135	0.394385	0.733	0.506	5.83114e-131	9311	LOC_Os09g28060
5.32055e-135	0.255926	0.274	0.072	1.37813e-130	9311	LOC_Os04g52600
9.90478e-135	0.48158	0.844	0.685	2.56554e-130	9311	LOC_Os08g06100
1.00717e-134	0.264554	0.139	0.006	2.60876e-130	9311	LOC_Os04g51680
1.08876e-134	0.454528	0.424	0.178	2.82011e-130	9311	LOC_Os05g31970
1.97193e-134	0.201371	0.157	0.013	5.10768e-130	9311	LOC_Os08g32610
6.09922e-134	0.238731	0.245	0.057	1.57982e-129	9311	LOC_Os08g44770
3.46571e-133	0.410923	0.392	0.174	8.97688e-129	9311	LOC_Os03g53650
4.05328e-133	0.397595	0.466	0.227	1.04988e-128	9311	LOC_Os02g53870
5.89929e-133	0.47248	0.553	0.321	1.52803e-128	9311	LOC_Os01g51220
7.56299e-133	0.37163	0.938	0.883	1.95896e-128	9311	LOC_Os06g42720
1.50269e-132	0.726407	0.285	0.086	3.89227e-128	9311	LOC_Os01g57040
8.70313e-132	0.380363	0.135	0.005	2.25429e-127	9311	LOC_Os06g49840
1.10331e-131	0.348363	0.499	0.254	2.85779e-127	9311	LOC_Os08g30790
2.49366e-131	0.200482	0.205	0.036	6.45907e-127	9311	LOC_Os07g38560
3.23327e-131	0.270601	0.184	0.026	8.37482e-127	9311	LOC_Os08g08700
8.92648e-131	0.261201	0.294	0.089	2.31214e-126	9311	LOC_Os06g48600
1.33089e-130	0.398631	0.666	0.424	3.44726e-126	9311	LOC_Os05g23130
1.42542e-130	0.322401	0.252	0.065	3.69213e-126	9311	LOC_Os09g23530
3.04097e-130	0.486401	0.851	0.678	7.87673e-126	9311	LOC_Os01g57470
3.26815e-130	0.240883	0.225	0.047	8.46516e-126	9311	LOC_Os01g63410
2.83938e-129	0.206218	0.167	0.019	7.35457e-125	9311	LOC_Os07g43970
3.42116e-129	0.229553	0.183	0.026	8.86149e-125	9311	LOC_Os01g07870
7.25741e-129	0.262346	0.229	0.05	1.87981e-124	9311	LOC_Os06g11980
2.45605e-128	0.268905	0.244	0.06	6.36165e-124	9311	LOC_Os09g29300
3.78212e-128	0.559085	0.676	0.462	9.79645e-124	9311	LOC_Os04g54300
4.37725e-128	0.467916	0.632	0.4	1.1338e-123	9311	LOC_Os01g25820
4.45693e-128	0.231925	0.249	0.063	1.15443e-123	9311	LOC_Os01g47620
2.03893e-127	0.336903	0.579	0.33	5.28124e-123	9311	LOC_Os10g33270
3.77337e-127	0.26479	0.297	0.092	9.77378e-123	9311	LOC_Os02g04010
7.22542e-125	0.305856	0.337	0.127	1.87153e-120	9311	LOC_Os03g04470
1.24011e-124	0.287771	0.991	0.978	3.21214e-120	9311	LOC_Os03g20370
4.24666e-124	0.382377	0.444	0.207	1.09997e-119	9311	LOC_Os01g16714
2.21065e-123	0.737616	0.457	0.228	5.72604e-119	9311	LOC_Os01g50104
2.23625e-123	0.211844	0.21	0.043	5.79234e-119	9311	LOC_Os10g35644
4.2145e-123	0.289739	0.388	0.169	1.09164e-118	9311	LOC_Os04g56520
9.73589e-123	0.203402	0.23	0.055	2.52179e-118	9311	LOC_Os01g51800
1.83319e-122	0.31167	0.205	0.041	4.74833e-118	9311	LOC_Os05g04490
4.24862e-122	0.414162	0.256	0.073	1.10048e-117	9311	LOC_Os08g05970
1.00162e-121	0.359952	0.724	0.487	2.59439e-117	9311	LOC_Os09g29170
1.19779e-121	0.430186	0.809	0.651	3.10251e-117	9311	LOC_Os04g02830
2.06782e-121	0.9094	0.644	0.412	5.35607e-117	9311	LOC_Os01g57030
1.32749e-120	0.411652	0.947	0.885	3.43845e-116	9311	LOC_Os02g52290
5.65994e-120	0.395604	0.305	0.112	1.46604e-115	9311	LOC_Os12g43350
9.77347e-120	0.5235	0.549	0.314	2.53152e-115	9311	LOC_Os01g09080
3.78289e-119	0.559871	0.628	0.39	9.79844e-115	9311	LOC_Os08g35110
5.45843e-119	0.235568	0.123	0.005	1.41384e-114	9311	LOC_Os12g22970
6.28148e-119	0.420603	0.779	0.622	1.62703e-114	9311	LOC_Os03g07380
2.52498e-118	0.221987	0.262	0.074	6.54019e-114	9311	LOC_Os01g56560
1.68888e-117	0.369892	0.557	0.323	4.37453e-113	9311	LOC_Os01g09770
8.69104e-117	0.229311	0.257	0.075	2.25115e-112	9311	LOC_Os05g06280
3.5118e-116	0.233132	0.253	0.071	9.09626e-112	9311	LOC_Os07g27930
1.84099e-115	0.307516	0.486	0.252	4.76853e-111	9311	LOC_Os02g42020
2.22589e-115	0.350385	0.64	0.389	5.7655e-111	9311	LOC_Os08g43200
3.71882e-115	0.431433	0.834	0.661	9.63248e-111	9311	LOC_Os02g44820
7.95853e-115	0.451461	0.545	0.318	2.06142e-110	9311	LOC_Os07g42520
1.26733e-114	0.29324	0.962	0.853	3.28264e-110	9311	LOC_Os02g41860
1.65797e-114	0.326873	0.5	0.245	4.29447e-110	9311	LOC_Os07g09010
1.69137e-114	0.40272	0.656	0.453	4.381e-110	9311	LOC_Os01g36070
1.76116e-114	0.266885	0.379	0.163	4.56176e-110	9311	LOC_Os12g30060
2.73782e-114	0.343797	0.57	0.335	7.0915e-110	9311	LOC_Os12g31860
4.2797e-114	0.544015	0.947	0.931	1.10853e-109	9311	LOC_Os12g04204
8.34306e-113	0.338921	0.591	0.344	2.16102e-108	9311	LOC_Os09g21740
1.2575e-112	0.385542	0.696	0.469	3.25719e-108	9311	LOC_Os09g30486
1.83927e-112	0.675823	0.496	0.284	4.76407e-108	9311	LOC_Os08g07620
3.8698e-112	0.500772	0.516	0.298	1.00236e-107	9311	LOC_Os05g29000
3.30523e-110	0.420414	0.801	0.66	8.5612e-106	9311	LOC_Os12g31780
6.78409e-109	0.331799	0.474	0.245	1.75722e-104	9311	LOC_Os02g47090
8.38752e-109	0.256485	0.323	0.119	2.17254e-104	9311	LOC_Os06g47700
1.0712e-108	0.380505	0.914	0.791	2.77461e-104	9311	LOC_Os07g45060
1.60045e-108	0.403843	0.563	0.344	4.14549e-104	9311	LOC_Os01g32780
1.73884e-108	0.338903	0.413	0.2	4.50394e-104	9311	LOC_Os01g03890
1.76873e-108	0.389229	0.55	0.351	4.58137e-104	9311	LOC_Os04g31110
1.9845e-108	0.337088	0.392	0.179	5.14026e-104	9311	LOC_Os03g61240
6.84976e-108	0.341249	0.579	0.36	1.77422e-103	9311	LOC_Os08g32080
7.16866e-108	0.29574	0.549	0.311	1.85683e-103	9311	LOC_Os07g43170
8.42504e-108	0.355547	0.923	0.817	2.18225e-103	9311	LOC_Os01g52260
1.0693e-107	0.210232	0.223	0.059	2.76969e-103	9311	LOC_Os03g17490
2.0884e-107	0.353461	0.378	0.177	5.40938e-103	9311	LOC_Os07g22840
2.30115e-107	0.406828	0.431	0.219	5.96044e-103	9311	LOC_Os12g32610
1.14444e-106	0.266648	0.972	0.929	2.96433e-102	9311	LOC_Os03g45730
1.50403e-106	0.30029	0.425	0.212	3.89574e-102	9311	LOC_Os02g47000
1.59613e-106	0.205425	0.11	0.004	4.13429e-102	9311	LOC_Os10g34940
1.91089e-106	0.323839	0.83	0.663	4.94958e-102	9311	LOC_Os07g12510
2.65345e-106	0.233081	0.203	0.048	6.87298e-102	9311	LOC_Os08g44590
6.97035e-106	0.211331	0.156	0.023	1.80546e-101	9311	LOC_Os09g20150
4.50276e-105	0.253346	0.136	0.015	1.16631e-100	9311	LOC_Os08g05980
9.33787e-105	0.351693	0.167	0.03	2.4187e-100	9311	LOC_Os02g37070
7.11882e-104	0.380735	0.731	0.531	1.84392e-99	9311	LOC_Os02g38050
2.43411e-103	0.376415	0.574	0.36	6.30482e-99	9311	LOC_Os07g43900
4.05623e-103	0.23196	0.292	0.107	1.05065e-98	9311	LOC_Os09g23730
8.14675e-103	0.232644	0.256	0.083	2.11017e-98	9311	LOC_Os02g34460
9.37092e-103	0.35149	0.463	0.25	2.42726e-98	9311	LOC_Os12g43580
1.4534e-102	0.362256	0.69	0.481	3.76461e-98	9311	LOC_Os05g50180
1.97412e-102	0.34958	0.9	0.814	5.11337e-98	9311	LOC_Os02g44940
2.50242e-102	0.316879	0.62	0.412	6.48177e-98	9311	LOC_Os05g04620
1.0475e-101	0.434846	0.801	0.647	2.71324e-97	9311	LOC_Os11g01530
1.94276e-100	0.209314	0.202	0.053	5.03213e-96	9311	LOC_Os03g63490
1.9536e-100	0.394856	0.778	0.636	5.06021e-96	9311	LOC_Os04g45280
2.97482e-100	0.230312	0.271	0.091	7.70537e-96	9311	LOC_Os05g05950
4.27826e-100	0.284645	0.897	0.799	1.10815e-95	9311	LOC_Os03g03130
4.43499e-100	0.271411	0.953	0.874	1.14875e-95	9311	LOC_Os01g66120
5.13027e-100	0.353905	0.655	0.474	1.32884e-95	9311	LOC_Os01g07376
5.30938e-100	0.318069	0.617	0.405	1.37524e-95	9311	LOC_Os08g07830
6.89635e-100	0.397825	0.407	0.219	1.78629e-95	9311	LOC_Os12g07490
1.47248e-99	0.609238	0.597	0.36	3.81402e-95	9311	LOC_Os11g33270
1.2388e-98	0.306863	0.502	0.294	3.20875e-94	9311	LOC_Os03g05260
3.598e-98	0.276476	0.974	0.947	9.31955e-94	9311	LOC_Os07g40580
4.25783e-98	0.392387	0.996	0.991	1.10286e-93	9311	LOC_Os04g44870
7.09219e-98	0.231424	0.299	0.116	1.83702e-93	9311	LOC_Os04g56610
2.13288e-97	0.271885	0.329	0.134	5.52459e-93	9311	LOC_Os05g49080
4.06867e-97	0.257687	0.342	0.148	1.05387e-92	9311	LOC_Os08g39980
5.71239e-97	0.307916	0.296	0.116	1.47962e-92	9311	LOC_Os02g41580
7.41687e-97	0.322643	0.441	0.231	1.92112e-92	9311	LOC_Os05g04960
7.60167e-97	0.310393	0.849	0.729	1.96898e-92	9311	LOC_Os02g07410
1.64765e-96	0.375542	0.916	0.877	4.26773e-92	9311	LOC_Os05g01560
2.45899e-96	0.367056	0.822	0.664	6.36928e-92	9311	LOC_Os02g56120
3.19346e-96	0.360082	0.708	0.526	8.27169e-92	9311	LOC_Os03g05730
5.54021e-96	0.405357	0.985	0.974	1.43502e-91	9311	LOC_Os11g04409
7.76779e-96	0.543424	0.922	0.858	2.01201e-91	9311	LOC_Os01g16140
9.68417e-96	0.24011	0.289	0.109	2.50839e-91	9311	LOC_Os08g06010
1.37209e-95	0.266476	0.377	0.176	3.55398e-91	9311	LOC_Os04g41450
1.8263e-95	0.300238	0.992	0.975	4.73049e-91	9311	LOC_Os03g59220
1.30689e-94	0.303541	0.441	0.246	3.3851e-90	9311	LOC_Os07g05950
1.46294e-94	0.27835	0.394	0.197	3.78932e-90	9311	LOC_Os08g01850
1.99471e-94	0.310245	0.614	0.422	5.16669e-90	9311	LOC_Os05g41510
6.07228e-94	0.27774	0.295	0.118	1.57284e-89	9311	LOC_Os04g53680
8.12382e-94	0.318729	0.831	0.657	2.10423e-89	9311	LOC_Os05g03190
3.43483e-93	0.572056	0.76	0.609	8.8969e-89	9311	LOC_Os03g62060
3.75078e-93	0.352361	0.505	0.296	9.71526e-89	9311	LOC_Os12g39400
1.83409e-92	0.271349	0.413	0.213	4.75066e-88	9311	LOC_Os01g56580
2.4882e-92	0.732292	0.706	0.501	6.44493e-88	9311	LOC_Os12g02300
3.23503e-92	0.343143	0.544	0.349	8.37937e-88	9311	LOC_Os09g26900
9.56029e-92	0.306152	0.477	0.274	2.47631e-87	9311	LOC_Os03g17000
1.25774e-91	0.200868	0.124	0.015	3.2578e-87	9311	LOC_Os10g38470
1.34117e-91	0.290611	0.464	0.256	3.47391e-87	9311	LOC_Os11g14190
2.36574e-91	0.316217	0.247	0.084	6.12774e-87	9311	LOC_Os04g45590
4.09058e-91	0.259908	0.905	0.727	1.05954e-86	9311	LOC_Os04g58190
2.39291e-90	0.317291	0.377	0.192	6.19812e-86	9311	LOC_Os06g06180
5.5179e-90	0.264798	0.855	0.718	1.42925e-85	9311	LOC_Os06g10890
4.03727e-89	0.399568	0.491	0.306	1.04573e-84	9311	LOC_Os03g11900
3.55175e-88	0.233479	0.479	0.254	9.19975e-84	9311	LOC_Os05g45070
1.15038e-87	0.243546	0.333	0.15	2.97971e-83	9311	LOC_Os06g17020
1.1909e-87	0.215191	0.276	0.105	3.08468e-83	9311	LOC_Os10g35850
1.62773e-87	0.299887	0.433	0.243	4.21614e-83	9311	LOC_Os03g01770
1.86078e-87	0.774455	0.727	0.625	4.8198e-83	9311	LOC_Os07g18750
2.54472e-87	0.309385	0.897	0.769	6.59133e-83	9311	LOC_Os01g55510
3.00025e-87	0.263809	0.32	0.139	7.77124e-83	9311	LOC_Os02g42310
5.3012e-86	0.302652	0.822	0.7	1.37312e-81	9311	LOC_Os12g44000
1.51849e-85	0.42611	0.937	0.893	3.93318e-81	9311	LOC_Os02g13380
1.60705e-85	0.23232	0.287	0.125	4.16258e-81	9311	LOC_Os03g02680
1.64394e-85	0.404047	0.717	0.542	4.25812e-81	9311	LOC_Os07g27810
1.71223e-85	0.252836	0.943	0.843	4.43501e-81	9311	LOC_Os07g42370
2.73876e-85	0.281682	0.961	0.921	7.09394e-81	9311	LOC_Os10g40410
4.88285e-85	0.253363	0.454	0.255	1.26475e-80	9311	LOC_Os07g30100
5.16403e-85	0.368288	0.76	0.584	1.33759e-80	9311	LOC_Os02g21250
5.46094e-85	0.387603	0.705	0.542	1.41449e-80	9311	LOC_Os07g42200
1.91828e-84	0.290853	0.685	0.516	4.96872e-80	9311	LOC_Os07g30820
2.16292e-84	0.384301	0.899	0.82	5.6024e-80	9311	LOC_Os04g58710
2.43124e-84	0.315942	0.868	0.745	6.29741e-80	9311	LOC_Os01g64170
4.56467e-84	0.402755	0.756	0.624	1.18234e-79	9311	LOC_Os01g52730
7.01091e-84	0.415813	0.313	0.137	1.81597e-79	9311	LOC_Os11g05170
3.11729e-83	0.239329	0.824	0.655	8.0744e-79	9311	LOC_Os02g37320
3.48443e-83	0.298917	0.778	0.567	9.02538e-79	9311	LOC_Os12g40890
3.85827e-83	0.264082	0.42	0.232	9.99368e-79	9311	LOC_Os09g20650
2.26266e-82	0.224563	0.235	0.082	5.86074e-78	9311	LOC_Os10g10620
3.32693e-82	0.279041	0.59	0.397	8.61741e-78	9311	LOC_Os06g03600
2.1102e-81	0.3046	0.322	0.145	5.46585e-77	9311	LOC_Os05g34730
2.89096e-81	0.34604	0.793	0.628	7.48815e-77	9311	LOC_Os01g68650
5.17199e-81	0.211515	0.231	0.082	1.33965e-76	9311	LOC_Os08g44560
1.04815e-80	0.243551	0.248	0.096	2.71493e-76	9311	LOC_Os02g32060
1.05495e-80	0.263398	0.947	0.925	2.73253e-76	9311	LOC_Os06g41010
1.05671e-80	0.385795	0.286	0.123	2.7371e-76	9311	LOC_Os09g31025
1.22891e-80	0.23894	0.249	0.093	3.18312e-76	9311	LOC_Os11g29630
1.35823e-80	0.29135	0.261	0.105	3.5181e-76	9311	LOC_Os10g37230
3.26381e-80	0.308274	0.88	0.767	8.45392e-76	9311	LOC_Os11g06440
3.337e-80	0.30123	0.147	0.032	8.6435e-76	9311	LOC_Os07g40240
3.51899e-80	0.258159	0.857	0.731	9.11489e-76	9311	LOC_Os05g42424
4.17938e-80	0.333997	0.449	0.26	1.08254e-75	9311	LOC_Os07g33280
5.27797e-80	0.283655	0.566	0.356	1.3671e-75	9311	LOC_Os01g65780
5.77316e-80	0.203535	0.172	0.046	1.49536e-75	9311	LOC_Os02g15280
6.74873e-80	0.343196	0.715	0.549	1.74806e-75	9311	LOC_Os01g51920
8.19928e-80	0.520978	0.774	0.642	2.12378e-75	9311	LOC_Os01g26664
1.85519e-79	0.269419	0.286	0.126	4.80532e-75	9311	LOC_Os04g54310
3.31893e-79	0.239662	0.187	0.057	8.59669e-75	9311	LOC_Os05g11950
4.97329e-79	0.226309	0.215	0.076	1.28818e-74	9311	LOC_Os02g48730
1.16653e-78	0.345877	0.398	0.209	3.02154e-74	9311	LOC_Os01g72130
2.42321e-78	0.256464	0.373	0.191	6.2766e-74	9311	LOC_Os06g44170
4.77532e-78	0.316289	0.576	0.396	1.2369e-73	9311	LOC_Os02g55910
1.01161e-77	0.383521	0.709	0.547	2.62027e-73	9311	LOC_Os06g35770
1.0568e-77	0.254855	0.538	0.332	2.73732e-73	9311	LOC_Os03g19020
1.07521e-77	0.324326	0.697	0.482	2.78501e-73	9311	LOC_Os11g06390
1.87922e-77	0.277917	0.881	0.783	4.86757e-73	9311	LOC_Os03g57340
2.74945e-77	0.339506	0.838	0.683	7.12161e-73	9311	LOC_Os01g15970
1.06901e-76	0.320321	0.628	0.482	2.76896e-72	9311	LOC_Os01g53079
1.21661e-76	0.231579	0.388	0.208	3.15126e-72	9311	LOC_Os02g09650
1.52095e-76	0.275237	0.325	0.156	3.93958e-72	9311	LOC_Os03g44650
2.34262e-76	0.391146	0.4	0.217	6.06784e-72	9311	LOC_Os01g14670
4.59247e-76	0.345875	0.525	0.329	1.18954e-71	9311	LOC_Os04g59330
9.29306e-76	0.219895	0.323	0.152	2.40709e-71	9311	LOC_Os03g13860
4.09122e-75	0.285767	0.41	0.225	1.05971e-70	9311	LOC_Os01g54450
5.18716e-75	0.366722	0.405	0.227	1.34358e-70	9311	LOC_Os02g48280
7.38389e-75	0.3717	0.79	0.653	1.91257e-70	9311	LOC_Os04g44060
2.83154e-74	0.254306	0.584	0.407	7.33425e-70	9311	LOC_Os03g17020
5.25677e-74	0.316359	0.698	0.515	1.36161e-69	9311	LOC_Os02g10730
9.33635e-74	0.302742	0.672	0.516	2.4183e-69	9311	LOC_Os06g39140
2.83363e-73	0.262758	0.424	0.249	7.33966e-69	9311	LOC_Os03g07430
3.39867e-73	0.324313	0.707	0.579	8.80323e-69	9311	LOC_Os01g16640
5.51929e-73	0.274003	0.412	0.237	1.42961e-68	9311	LOC_Os08g03570
6.034e-73	0.335801	0.866	0.696	1.56293e-68	9311	LOC_Os01g47780
1.45843e-72	0.383051	0.762	0.68	3.77763e-68	9311	LOC_Os12g39860
1.68841e-72	0.239319	0.894	0.855	4.37332e-68	9311	LOC_Os04g35300
1.71475e-72	0.265432	0.316	0.151	4.44155e-68	9311	LOC_Os08g27720
3.09567e-72	0.253499	0.66	0.453	8.0184e-68	9311	LOC_Os10g39140
3.42658e-72	0.263126	0.808	0.691	8.87554e-68	9311	LOC_Os03g20780
5.87432e-72	0.30196	0.434	0.247	1.52157e-67	9311	LOC_Os08g42750
6.21585e-72	0.222213	0.278	0.125	1.61003e-67	9311	LOC_Os10g21930
1.91232e-71	0.217496	0.36	0.195	4.95328e-67	9311	LOC_Os02g53060
3.38929e-71	0.357796	0.733	0.607	8.77895e-67	9311	LOC_Os03g25940
4.37724e-71	0.23664	0.473	0.302	1.13379e-66	9311	LOC_Os05g47530
4.96204e-71	0.280953	0.637	0.445	1.28527e-66	9311	LOC_Os12g32620
5.83158e-71	0.250662	0.431	0.258	1.51049e-66	9311	LOC_Os02g11820
8.07982e-71	0.216798	0.28	0.126	2.09284e-66	9311	LOC_Os05g08640
8.74067e-71	0.241207	0.896	0.832	2.26401e-66	9311	LOC_Os01g41610
1.4855e-70	0.297599	0.585	0.422	3.84775e-66	9311	LOC_Os02g38840
3.29795e-70	0.409612	1	1	8.54235e-66	9311	LOC_Os08g10480
3.3841e-70	0.217766	0.997	0.992	8.76549e-66	9311	LOC_Os01g05490
4.47864e-70	0.264581	0.28	0.124	1.16006e-65	9311	LOC_Os05g44340
7.27192e-70	0.20411	0.278	0.122	1.88357e-65	9311	LOC_Os01g04280
4.30924e-69	0.613828	0.588	0.427	1.11618e-64	9311	LOC_Os01g04050
4.56723e-69	0.30491	0.291	0.142	1.183e-64	9311	LOC_Os03g64050
7.64165e-69	0.560403	0.519	0.356	1.97934e-64	9311	LOC_Os05g39054
9.3972e-69	0.288614	0.533	0.34	2.43406e-64	9311	LOC_Os02g50350
9.89884e-69	0.254756	0.403	0.236	2.564e-64	9311	LOC_Os05g11720
1.10553e-68	0.2034	0.227	0.087	2.86354e-64	9311	LOC_Os05g37130
1.30777e-68	0.266643	0.308	0.15	3.38737e-64	9311	LOC_Os11g03420
1.62965e-68	0.263295	0.507	0.331	4.22112e-64	9311	LOC_Os01g59130
1.97577e-68	0.235662	0.17	0.053	5.11763e-64	9311	LOC_Os10g36020
2.63863e-68	0.255491	0.232	0.093	6.83457e-64	9311	LOC_Os03g51470
3.28484e-68	0.252117	0.408	0.244	8.50838e-64	9311	LOC_Os06g44620
4.88806e-68	0.235115	0.34	0.177	1.26611e-63	9311	LOC_Os01g61670
7.169e-67	0.21305	0.263	0.117	1.85691e-62	9311	LOC_Os07g41050
7.21878e-67	0.307204	0.326	0.159	1.86981e-62	9311	LOC_Os01g70500
7.737e-67	0.268153	0.61	0.429	2.00404e-62	9311	LOC_Os03g30830
1.03477e-66	0.222689	0.948	0.885	2.68025e-62	9311	LOC_Os06g11135
4.09421e-66	0.400339	0.349	0.194	1.06048e-61	9311	LOC_Os09g35020
5.20858e-66	0.237887	0.455	0.291	1.34913e-61	9311	LOC_Os03g15590
2.96543e-65	0.270518	0.473	0.299	7.68106e-61	9311	LOC_Os06g44160
4.87531e-65	0.23705	0.142	0.038	1.2628e-60	9311	LOC_Os09g15550
1.07589e-64	0.255387	0.386	0.208	2.78678e-60	9311	LOC_Os12g02080
1.50727e-64	0.281945	0.635	0.49	3.90413e-60	9311	LOC_Os05g48980
1.81896e-64	0.368444	0.53	0.374	4.71147e-60	9311	LOC_Os04g38610
3.65442e-64	0.318433	0.745	0.609	9.46568e-60	9311	LOC_Os08g04800
7.19011e-64	0.325841	0.948	0.883	1.86238e-59	9311	LOC_Os02g10500
8.26765e-64	0.216643	0.309	0.154	2.14149e-59	9311	LOC_Os10g37190
9.39038e-64	0.28426	0.688	0.518	2.4323e-59	9311	LOC_Os01g72360
4.75099e-63	0.543103	0.316	0.173	1.2306e-58	9311	LOC_Os03g52370
5.88277e-63	0.313016	0.716	0.593	1.52376e-58	9311	LOC_Os09g24440
1.59276e-62	0.350645	0.403	0.242	4.12556e-58	9311	LOC_Os05g38264
1.89145e-62	0.340275	0.746	0.609	4.89925e-58	9311	LOC_Os04g08350
2.65483e-62	0.225386	0.169	0.055	6.87654e-58	9311	LOC_Os06g34730
4.16327e-62	0.257712	0.126	0.032	1.07837e-57	9311	LOC_Os06g15620
6.63365e-61	0.236421	0.889	0.863	1.71825e-56	9311	LOC_Os03g09210
6.93465e-61	0.222213	0.978	0.975	1.79621e-56	9311	LOC_Os05g48930
1.86206e-60	0.261102	0.155	0.049	4.82311e-56	9311	LOC_Os10g40470
2.36891e-60	0.280887	0.49	0.348	6.13596e-56	9311	LOC_Os06g50970
5.61243e-60	0.218526	0.382	0.222	1.45373e-55	9311	LOC_Os05g48855
6.2042e-60	0.251231	0.589	0.439	1.60701e-55	9311	LOC_Os07g44744
6.77811e-60	0.264864	0.605	0.452	1.75567e-55	9311	LOC_Os09g35690
7.58313e-60	0.279035	0.656	0.494	1.96418e-55	9311	LOC_Os02g52170
1.27298e-59	0.27287	0.73	0.616	3.29726e-55	9311	LOC_Os03g58630
2.23961e-59	0.284103	0.512	0.339	5.80103e-55	9311	LOC_Os03g57640
2.32342e-59	0.555982	0.636	0.501	6.01812e-55	9311	LOC_Os09g26340
2.56846e-59	0.270657	0.686	0.532	6.65282e-55	9311	LOC_Os02g54780
2.76548e-59	0.280429	0.768	0.637	7.16314e-55	9311	LOC_Os03g08500
3.79026e-59	0.24135	0.698	0.547	9.81754e-55	9311	LOC_Os01g07420
4.55386e-59	0.288582	0.392	0.235	1.17954e-54	9311	LOC_Os07g46830
7.51265e-59	0.253871	0.712	0.604	1.94593e-54	9311	LOC_Os07g25420
7.77255e-59	0.236227	0.802	0.72	2.01325e-54	9311	LOC_Os07g09600
1.55478e-58	0.344036	0.484	0.344	4.02719e-54	9311	LOC_Os06g15990
1.69688e-58	0.394499	0.452	0.308	4.39525e-54	9311	LOC_Os01g73024
2.23518e-58	0.208533	0.339	0.188	5.78958e-54	9311	LOC_Os08g06110
2.38695e-58	0.247228	0.79	0.669	6.18268e-54	9311	LOC_Os03g50280
6.40884e-58	0.23972	0.76	0.646	1.66002e-53	9311	LOC_Os01g42700
8.54039e-58	0.413839	0.688	0.528	2.21213e-53	9311	LOC_Os04g02560
1.29086e-57	0.230868	0.541	0.367	3.34359e-53	9311	LOC_Os01g62460
1.7708e-57	0.222556	0.319	0.171	4.58672e-53	9311	LOC_Os01g37690
2.90559e-57	0.2091	0.211	0.087	7.52605e-53	9311	LOC_Os09g28510
3.14894e-57	0.224325	0.935	0.868	8.15639e-53	9311	LOC_Os04g54830
3.59822e-57	0.226229	0.214	0.089	9.32012e-53	9311	LOC_Os04g45980
1.44021e-56	0.56742	0.185	0.074	3.73044e-52	9311	LOC_Os04g28320
1.72565e-56	0.236866	0.554	0.39	4.46978e-52	9311	LOC_Os03g16700
1.80753e-56	0.244253	0.396	0.236	4.68187e-52	9311	LOC_Os04g03980
1.88512e-56	0.24178	0.828	0.752	4.88284e-52	9311	LOC_Os02g51750
2.3436e-56	0.272528	0.675	0.529	6.07041e-52	9311	LOC_Os11g47760
2.59466e-56	0.233125	0.288	0.144	6.72068e-52	9311	LOC_Os12g01530
2.95929e-56	0.201173	0.953	0.915	7.66515e-52	9311	LOC_Os01g24070
3.3688e-56	0.229954	0.181	0.067	8.72588e-52	9311	LOC_Os08g37680
3.65577e-56	0.211367	0.45	0.283	9.46918e-52	9311	LOC_Os01g48790
6.40582e-56	0.277256	0.975	0.963	1.65924e-51	9311	LOC_Os07g07040
1.17375e-55	0.260924	0.587	0.42	3.04024e-51	9311	LOC_Os03g62790
2.19829e-55	0.242543	0.267	0.13	5.694e-51	9311	LOC_Os02g50374
5.18547e-55	0.29323	0.63	0.497	1.34314e-50	9311	LOC_Os02g55610
5.93389e-55	0.248156	0.921	0.879	1.537e-50	9311	LOC_Os03g08330
7.26144e-55	0.268184	0.903	0.839	1.88086e-50	9311	LOC_Os04g45070
7.51717e-55	0.318124	0.648	0.53	1.9471e-50	9311	LOC_Os01g01450
9.77974e-55	0.281577	0.37	0.223	2.53315e-50	9311	LOC_Os10g23820
1.05248e-54	0.291711	0.625	0.477	2.72614e-50	9311	LOC_Os01g18050
1.08708e-54	0.224107	0.441	0.277	2.81575e-50	9311	LOC_Os05g42350
1.31321e-54	0.318274	0.732	0.658	3.40149e-50	9311	LOC_Os02g52430
4.29171e-54	0.238857	0.516	0.357	1.11164e-49	9311	LOC_Os11g32110
8.20443e-54	0.284731	0.711	0.594	2.12511e-49	9311	LOC_Os01g09000
2.5348e-53	0.227453	0.724	0.602	6.56565e-49	9311	LOC_Os03g58840
2.89194e-53	0.244355	0.442	0.287	7.4907e-49	9311	LOC_Os09g20240
3.04429e-53	0.22624	0.536	0.388	7.88532e-49	9311	LOC_Os01g12880
6.09889e-53	0.215651	0.89	0.818	1.57973e-48	9311	LOC_Os05g48800
2.28471e-52	0.239822	0.424	0.281	5.91784e-48	9311	LOC_Os02g36990
3.32955e-52	0.215286	0.409	0.258	8.62419e-48	9311	LOC_Os05g44100
3.70386e-52	0.201307	0.362	0.213	9.59373e-48	9311	LOC_Os10g10080
3.73575e-52	0.264664	0.764	0.686	9.67634e-48	9311	LOC_Os09g16760
9.8861e-52	0.240963	0.601	0.448	2.5607e-47	9311	LOC_Os01g72690
1.42358e-51	0.216189	0.793	0.704	3.68734e-47	9311	LOC_Os01g40650
5.04965e-51	0.242362	0.855	0.821	1.30796e-46	9311	LOC_Os12g32950
5.83655e-51	0.24214	0.906	0.817	1.51178e-46	9311	LOC_Os03g59360
7.20086e-51	0.253415	0.526	0.374	1.86517e-46	9311	LOC_Os04g31610
1.23145e-50	0.264804	0.874	0.765	3.18971e-46	9311	LOC_Os09g31000
1.24532e-50	0.216293	0.389	0.244	3.22562e-46	9311	LOC_Os02g48000
2.54372e-50	0.30776	0.547	0.401	6.58873e-46	9311	LOC_Os06g43660
3.38413e-50	0.253171	0.566	0.411	8.76558e-46	9311	LOC_Os07g38570
5.72819e-49	0.279276	0.443	0.297	1.48372e-44	9311	LOC_Os10g22050
9.54546e-49	0.313422	0.799	0.696	2.47247e-44	9311	LOC_Os04g57560
1.12029e-48	0.204568	0.453	0.305	2.90179e-44	9311	LOC_Os11g14180
1.6542e-48	0.220371	0.692	0.549	4.2847e-44	9311	LOC_Os11g37230
1.73191e-48	0.397774	0.576	0.447	4.48599e-44	9311	LOC_Os04g37880
1.82403e-48	0.271585	0.399	0.263	4.72461e-44	9311	LOC_Os06g08080
1.89516e-48	0.213602	0.523	0.367	4.90884e-44	9311	LOC_Os01g19800
2.17734e-48	0.220888	0.653	0.534	5.63975e-44	9311	LOC_Os08g09180
2.98023e-48	0.20692	0.462	0.318	7.7194e-44	9311	LOC_Os01g46932
3.5895e-48	0.378076	0.32	0.18	9.29753e-44	9311	LOC_Os05g45450
3.88339e-48	0.778891	0.346	0.214	1.00588e-43	9311	LOC_Os10g40460
6.54944e-48	0.212375	0.662	0.531	1.69643e-43	9311	LOC_Os10g39120
7.01257e-48	0.216118	0.319	0.184	1.8164e-43	9311	LOC_Os07g38840
1.75994e-47	0.409659	0.6	0.482	4.55861e-43	9311	LOC_Os02g09490
1.7728e-47	0.306446	0.533	0.381	4.5919e-43	9311	LOC_Os01g07300
2.15041e-47	0.213013	0.802	0.666	5.56999e-43	9311	LOC_Os01g53520
3.68508e-47	0.211264	0.873	0.804	9.5451e-43	9311	LOC_Os11g36340
8.13337e-47	0.319852	0.614	0.495	2.10671e-42	9311	LOC_Os03g48390
1.71982e-46	0.283202	0.452	0.313	4.45467e-42	9311	LOC_Os10g41550
2.34885e-46	0.240189	0.608	0.477	6.084e-42	9311	LOC_Os05g36360
3.61258e-46	0.206244	0.888	0.861	9.3573e-42	9311	LOC_Os05g34680
3.75476e-46	0.205713	0.553	0.407	9.72557e-42	9311	LOC_Os01g72600
4.76898e-46	0.216603	0.879	0.767	1.23526e-41	9311	LOC_Os01g59150
5.78458e-46	0.211057	0.505	0.363	1.49832e-41	9311	LOC_Os05g11120
6.81721e-46	0.353756	0.48	0.327	1.76579e-41	9311	LOC_Os07g43290
1.00497e-45	0.34225	0.546	0.41	2.60306e-41	9311	LOC_Os01g27390
1.42208e-45	0.288999	0.709	0.592	3.68348e-41	9311	LOC_Os04g57720
2.65609e-45	0.579754	0.561	0.487	6.8798e-41	9311	LOC_Os01g09830
4.89485e-45	0.233829	0.995	0.995	1.26786e-40	9311	LOC_Os07g08840
6.87471e-45	0.218067	0.823	0.75	1.78069e-40	9311	LOC_Os01g04010
7.81555e-45	0.310712	0.587	0.471	2.02438e-40	9311	LOC_Os05g35500
9.89043e-45	0.219867	0.502	0.365	2.56182e-40	9311	LOC_Os06g51150
1.81006e-44	0.23111	0.877	0.824	4.68842e-40	9311	LOC_Os01g21440
2.54243e-44	0.353862	0.509	0.365	6.5854e-40	9311	LOC_Os05g34170
9.25785e-44	0.215004	0.354	0.222	2.39797e-39	9311	LOC_Os02g16030
1.34791e-43	0.259432	0.524	0.381	3.49135e-39	9311	LOC_Os01g49710
1.34832e-43	0.208706	0.245	0.129	3.49242e-39	9311	LOC_Os06g47220
2.06491e-43	0.213627	0.571	0.441	5.34852e-39	9311	LOC_Os09g35630
2.5568e-43	0.208019	0.711	0.599	6.62262e-39	9311	LOC_Os03g13950
3.74346e-43	0.236662	0.305	0.183	9.69631e-39	9311	LOC_Os04g31030
6.24775e-43	0.226112	0.222	0.112	1.61829e-38	9311	LOC_Os02g39620
6.53507e-43	0.212487	0.597	0.476	1.69271e-38	9311	LOC_Os06g07830
1.36427e-42	0.203782	0.563	0.424	3.53373e-38	9311	LOC_Os02g08540
1.37832e-42	0.242856	0.378	0.252	3.57012e-38	9311	LOC_Os01g74370
1.84162e-42	0.246538	0.412	0.275	4.77016e-38	9311	LOC_Os12g03110
1.75925e-41	0.22288	0.276	0.156	4.55681e-37	9311	LOC_Os04g49680
2.29101e-41	0.233014	0.745	0.683	5.93417e-37	9311	LOC_Os06g44910
5.67184e-41	0.210546	0.606	0.477	1.46912e-36	9311	LOC_Os02g09960
1.40301e-40	0.200126	0.524	0.395	3.63407e-36	9311	LOC_Os09g32080
1.9341e-40	0.202756	0.223	0.118	5.0097e-36	9311	LOC_Os02g32980
2.03462e-40	0.219397	0.406	0.267	5.27008e-36	9311	LOC_Os02g41510
2.15519e-40	0.207774	0.577	0.452	5.58237e-36	9311	LOC_Os08g15230
2.55542e-40	0.208436	0.252	0.136	6.61904e-36	9311	LOC_Os12g07550
4.01125e-40	0.409732	0.482	0.362	1.03899e-35	9311	LOC_Os08g42800
2.01463e-39	0.200414	0.809	0.738	5.2183e-35	9311	LOC_Os02g06650
2.89305e-39	0.241845	0.521	0.4	7.49357e-35	9311	LOC_Os01g39000
3.9793e-39	0.241504	0.536	0.402	1.03072e-34	9311	LOC_Os02g30320
6.38421e-39	0.239221	0.752	0.658	1.65364e-34	9311	LOC_Os07g36140
9.95041e-39	0.22997	0.607	0.448	2.57736e-34	9311	LOC_Os09g31970
2.9879e-38	0.240031	0.132	0.053	7.73926e-34	9311	LOC_Os04g39370
4.15277e-38	0.231257	0.909	0.825	1.07565e-33	9311	LOC_Os02g44080
4.27533e-38	0.21258	0.242	0.13	1.10739e-33	9311	LOC_Os03g32420
4.32746e-38	0.206099	0.583	0.467	1.1209e-33	9311	LOC_Os06g07780
1.13492e-37	0.259549	0.465	0.331	2.93967e-33	9311	LOC_Os09g39940
1.99596e-37	0.22508	0.515	0.381	5.16993e-33	9311	LOC_Os01g72810
3.50908e-37	0.203603	0.48	0.36	9.08921e-33	9311	LOC_Os02g40890
2.89525e-36	0.247349	0.782	0.689	7.49929e-32	9311	LOC_Os10g25230
4.77092e-36	0.200028	0.76	0.68	1.23576e-31	9311	LOC_Os08g45070
9.46728e-36	0.203204	0.532	0.422	2.45222e-31	9311	LOC_Os05g51540
1.60336e-35	0.229523	0.942	0.917	4.15301e-31	9311	LOC_Os01g48420
4.09426e-35	0.25285	0.338	0.221	1.06049e-30	9311	LOC_Os11g43049
4.80549e-35	0.279783	0.961	0.953	1.24472e-30	9311	LOC_Os01g25560
1.12001e-33	0.21016	0.251	0.15	2.90104e-29	9311	LOC_Os02g02370
2.6064e-33	0.281881	0.197	0.107	6.75111e-29	9311	LOC_Os02g45200
2.13403e-31	0.285386	0.381	0.277	5.52757e-27	9311	LOC_Os11g07960
4.68525e-31	0.220106	0.827	0.736	1.21357e-26	9311	LOC_Os08g02120
5.67231e-31	0.272682	0.125	0.055	1.46924e-26	9311	LOC_Os12g44030
5.83152e-31	0.201463	0.658	0.575	1.51048e-26	9311	LOC_Os08g41100
1.4628e-30	0.205746	0.567	0.475	3.78896e-26	9311	LOC_Os11g08100
6.93618e-30	0.218845	0.28	0.177	1.79661e-25	9311	LOC_Os03g52380
3.42109e-29	0.226093	0.247	0.153	8.86132e-25	9311	LOC_Os03g59440
4.26869e-29	0.576758	0.245	0.147	1.10568e-24	9311	LOC_Os01g68580
1.16691e-28	0.201165	0.528	0.427	3.02253e-24	9311	LOC_Os07g41790
3.62069e-28	0.213146	0.277	0.179	9.3783e-24	9311	LOC_Os01g63210
5.47365e-28	0.207834	0.249	0.158	1.41778e-23	9311	LOC_Os04g54240
1.49791e-27	0.257693	0.431	0.333	3.87989e-23	9311	LOC_Os02g39360
1.54637e-27	0.251743	0.487	0.378	4.00542e-23	9311	LOC_Os02g33780
8.67943e-27	0.35466	0.737	0.664	2.24815e-22	9311	LOC_Os03g47034
5.39816e-26	0.207351	0.809	0.744	1.39823e-21	9311	LOC_Os05g35740
9.57114e-26	0.220882	0.198	0.117	2.47912e-21	9311	LOC_Os05g04440
1.93056e-24	0.273448	0.339	0.248	5.00053e-20	9311	LOC_Os05g44060
7.94027e-24	0.277523	0.755	0.742	2.05669e-19	9311	LOC_Os04g42930
4.7271e-23	0.21811	0.797	0.74	1.22441e-18	9311	LOC_Os02g26700
9.72634e-22	0.230395	0.499	0.397	2.51932e-17	9311	LOC_Os08g41290
5.10897e-21	0.217908	0.456	0.366	1.32333e-16	9311	LOC_Os12g24490
1.78954e-18	0.214556	0.375	0.286	4.63527e-14	9311	LOC_Os05g11910
9.92558e-17	0.40165	0.209	0.144	2.57092e-12	9311	LOC_Os01g62110
1.2362e-16	0.22463	0.216	0.147	3.20201e-12	9311	LOC_Os01g59970
7.55941e-16	0.203146	0.585	0.521	1.95804e-11	9311	LOC_Os11g42550
3.30696e-15	0.202131	0.154	0.099	8.56569e-11	9311	LOC_Os04g45130
1.38395e-13	0.287163	0.471	0.374	3.58471e-09	9311	LOC_Os04g15840
2.94756e-13	0.206187	0.44	0.583	7.63476e-09	9311	LOC_Os01g58890
5.36323e-12	0.220869	0.314	0.255	1.38918e-07	9311	LOC_Os02g16500
9.48898e-12	0.214635	0.829	0.824	2.45784e-07	9311	LOC_Os01g02139
8.28143e-08	0.202816	0.379	0.335	0.00214506	9311	LOC_Os04g50700
3.95092e-07	0.329736	0.443	0.416	0.0102337	9311	LOC_Os01g18744
0	4.09432	0.982	0.004	0	Nip	LOC_Os10g40520
0	3.71733	0.982	0	0	Nip	LOC_Os02g11859
0	3.64498	1	0	0	Nip	EVM0012725
0	3.37258	0.918	0	0	Nip	LOC_Os02g48714
0	3.21475	0.997	0.033	0	Nip	LOC_Os11g10520
0	3.00615	0.895	0	0	Nip	LOC_Os06g05020
0	2.90106	0.996	0	0	Nip	LOC_Os11g11980
0	2.85458	0.982	0.242	0	Nip	LOC_Os10g36703
0	2.40376	0.852	0	0	Nip	LOC_Os06g05010
0	2.36743	0.854	0	0	Nip	LOC_Os10g38501
0	2.35513	0.789	0	0	Nip	LOC_Os12g36220
0	2.34359	0.955	0.311	0	Nip	LOC_Os05g27780
0	2.31345	0.801	0	0	Nip	LOC_Os10g38495
0	2.21364	0.985	0	0	Nip	LOC_Os01g54739
0	2.16927	0.574	0	0	Nip	LOC_Os03g16030
0	2.10515	0.777	0	0	Nip	LOC_Os03g13140
0	2.0679	0.905	0.058	0	Nip	LOC_Os06g11290
0	2.03732	0.87	0.255	0	Nip	LOC_Os06g22960
0	2.00101	0.988	0.585	0	Nip	LOC_Os02g44500
0	1.95744	0.875	0	0	Nip	LOC_Os01g52594
0	1.94382	0.845	0	0	Nip	LOC_Os08g10500
0	1.93676	0.949	0.359	0	Nip	LOC_Os05g45020
0	1.91096	0.839	0.087	0	Nip	LOC_Os10g38360
0	1.88767	0.917	0	0	Nip	LOC_Os04g37774
0	1.86469	0.97	0.467	0	Nip	LOC_Os02g16040
0	1.84093	0.974	0	0	Nip	EVM0044414
0	1.81998	0.969	0	0	Nip	Add_EVM0009533
0	1.79301	0.836	0	0	Nip	LOC_Os05g10650
0	1.77637	0.905	0	0	Nip	LOC_Os12g35590
0	1.76015	0.829	0	0	Nip	LOC_Os02g37290
0	1.74986	0.673	0	0	Nip	LOC_Os09g10274
0	1.74099	0.961	0.279	0	Nip	LOC_Os02g50600
0	1.72485	0.949	0.001	0	Nip	LOC_Os03g54980
0	1.72075	0.524	0.064	0	Nip	LOC_Os10g18340
0	1.69967	0.925	0.175	0	Nip	LOC_Os01g52500
0	1.69235	0.959	0.318	0	Nip	LOC_Os06g38210
0	1.62857	0.922	0	0	Nip	LOC_Os01g60410
0	1.5429	0.978	0.45	0	Nip	LOC_Os02g38980
0	1.5309	0.757	0	0	Nip	LOC_Os04g17084
0	1.50966	0.812	0	0	Nip	LOC_Os09g30418
0	1.50221	0.804	0.344	0	Nip	LOC_Os04g34970
0	1.48939	0.84	0.005	0	Nip	LOC_Os07g37100
0	1.48616	0.943	0.491	0	Nip	LOC_Os05g25850
0	1.47424	0.534	0	0	Nip	LOC_Os07g37466
0	1.43461	0.998	0.923	0	Nip	LOC_Os02g07910
0	1.41537	0.777	0.32	0	Nip	LOC_Os08g04360
0	1.40038	0.982	0.602	0	Nip	LOC_Os01g59900
0	1.39954	0.869	0.24	0	Nip	LOC_Os07g49114
0	1.39476	0.848	0.046	0	Nip	LOC_Os01g68060
0	1.38999	0.839	0.575	0	Nip	LOC_Os11g06770
0	1.37649	0.545	0.083	0	Nip	LOC_Os06g38660
0	1.36802	0.732	0.164	0	Nip	LOC_Os01g55240
0	1.36608	0.679	0.172	0	Nip	LOC_Os02g55600
0	1.36517	0.91	0.461	0	Nip	LOC_Os11g06720
0	1.36331	0.764	0.074	0	Nip	LOC_Os06g05470
0	1.33811	0.812	0	0	Nip	LOC_Os05g10414
0	1.33297	0.869	0.11	0	Nip	LOC_Os12g42850
0	1.32356	0.766	0	0	Nip	LOC_Os03g08024
0	1.3228	0.871	0.381	0	Nip	LOC_Os12g42980
0	1.30815	0.723	0.356	0	Nip	LOC_Os02g03700
0	1.29474	0.754	0.328	0	Nip	LOC_Os07g41350
0	1.28052	0.536	0.082	0	Nip	LOC_Os04g02530
0	1.27699	0.977	0.641	0	Nip	LOC_Os03g22810
0	1.27559	0.717	0.125	0	Nip	LOC_Os01g06560
0	1.26831	0.708	0.343	0	Nip	LOC_Os11g05530
0	1.26106	0.626	0.015	0	Nip	LOC_Os03g21040
0	1.24014	0.634	0.098	0	Nip	LOC_Os12g01400
0	1.22917	0.839	0.25	0	Nip	LOC_Os08g37320
0	1.20922	0.74	0	0	Nip	LOC_Os01g05959
0	1.20378	0.945	0.526	0	Nip	LOC_Os08g30510
0	1.19515	0.828	0.392	0	Nip	LOC_Os03g55540
0	1.19499	0.705	0	0	Nip	LOC_Os05g47446
0	1.19091	0.807	0	0	Nip	LOC_Os06g33919
0	1.17539	0.41	0	0	Nip	LOC_Os03g02775
0	1.14989	0.896	0.526	0	Nip	LOC_Os04g02050
0	1.14921	0.99	0.861	0	Nip	LOC_Os10g40510
0	1.14243	0.627	0	0	Nip	LOC_Os11g47574
0	1.12567	0.74	0.001	0	Nip	LOC_Os11g14544
0	1.12226	0.968	0.713	0	Nip	LOC_Os05g33400
0	1.12185	0.718	0.149	0	Nip	LOC_Os04g17660
0	1.11552	0.975	0.732	0	Nip	LOC_Os03g48110
0	1.11346	0.563	0.055	0	Nip	LOC_Os12g02570
0	1.11195	0.625	0	0	Nip	LOC_Os07g12780
0	1.10709	0.508	0.042	0	Nip	LOC_Os06g35560
0	1.10103	0.637	0.142	0	Nip	LOC_Os01g66900
0	1.09773	0.988	0.736	0	Nip	LOC_Os03g53190
0	1.09648	0.438	0	0	Nip	LOC_Os04g56040
0	1.08825	0.821	0.226	0	Nip	LOC_Os01g57450
0	1.08394	0.876	0.591	0	Nip	LOC_Os02g44990
0	1.08369	0.688	0.195	0	Nip	LOC_Os03g15270
0	1.06925	0.732	0.196	0	Nip	LOC_Os07g42740
0	1.06814	0.603	0.017	0	Nip	LOC_Os06g09900
0	1.05767	0.819	0.421	0	Nip	LOC_Os07g47790
0	1.04527	0.535	0	0	Nip	LOC_Os05g39320
0	1.03371	0.924	0.492	0	Nip	LOC_Os04g58880
0	1.02608	0.624	0	0	Nip	LOC_Os12g28015
0	1.02602	0.687	0.055	0	Nip	LOC_Os02g51670
0	1.01084	0.75	0.214	0	Nip	LOC_Os11g35020
0	1.00835	0.687	0.002	0	Nip	LOC_Os05g43252
0	1.00834	0.623	0.022	0	Nip	LOC_Os05g10930
0	1.00421	1	0.984	0	Nip	LOC_Os03g46770
0	0.976552	0.609	0.112	0	Nip	LOC_Os10g36924
0	0.967427	0.606	0.23	0	Nip	LOC_Os01g16030
0	0.963968	0.63	0.001	0	Nip	LOC_Os09g29270
0	0.962368	0.566	0.077	0	Nip	LOC_Os07g33660
0	0.955819	0.921	0.635	0	Nip	LOC_Os10g30150
0	0.953566	0.721	0.234	0	Nip	LOC_Os05g41780
0	0.949969	0.763	0.399	0	Nip	LOC_Os07g35480
0	0.949493	0.74	0.163	0	Nip	LOC_Os07g08410
0	0.942799	0.95	0.866	0	Nip	LOC_Os08g34800
0	0.941527	0.867	0.475	0	Nip	LOC_Os08g34150
0	0.936614	0.518	0.001	0	Nip	LOC_Os01g03144
0	0.93338	0.696	0.074	0	Nip	LOC_Os03g18870
0	0.927015	0.851	0.529	0	Nip	LOC_Os07g12340
0	0.925263	0.686	0	0	Nip	LOC_Os03g20790
0	0.917213	0.61	0	0	Nip	Add_EVM0015885
0	0.914981	0.51	0.094	0	Nip	LOC_Os02g26430
0	0.905448	0.671	0	0	Nip	LOC_Os02g10370
0	0.903675	0.898	0.618	0	Nip	LOC_Os10g30790
0	0.899591	0.581	0	0	Nip	LOC_Os07g28644
0	0.895769	0.601	0.09	0	Nip	LOC_Os08g28710
0	0.895333	0.63	0.113	0	Nip	LOC_Os09g15670
0	0.891976	0.551	0.121	0	Nip	LOC_Os08g43210
0	0.884122	0.723	0.123	0	Nip	LOC_Os09g25314
0	0.88315	0.699	0.052	0	Nip	LOC_Os06g49490
0	0.862203	0.46	0.026	0	Nip	LOC_Os06g48240
0	0.859897	0.449	0.008	0	Nip	LOC_Os05g50654
0	0.859587	0.996	0.92	0	Nip	LOC_Os02g33070
0	0.85953	0.362	0	0	Nip	LOC_Os03g60760
0	0.858522	0.5	0.067	0	Nip	LOC_Os05g49620
0	0.85823	0.586	0.029	0	Nip	LOC_Os03g58040
0	0.857701	0.453	0	0	Nip	LOC_Os06g30924
0	0.846125	0.768	0.315	0	Nip	LOC_Os05g34710
0	0.839191	0.569	0.034	0	Nip	LOC_Os10g28340
0	0.837582	0.622	0	0	Nip	LOC_Os01g01700
0	0.834081	0.574	0	0	Nip	LOC_Os10g34802
0	0.829595	0.628	0.108	0	Nip	LOC_Os02g02780
0	0.829441	0.773	0.385	0	Nip	LOC_Os07g07350
0	0.828549	0.996	0.967	0	Nip	LOC_Os01g55830
0	0.827741	0.382	0.002	0	Nip	LOC_Os07g39350
0	0.827239	0.966	0.912	0	Nip	LOC_Os03g12670
0	0.825882	0.602	0	0	Nip	LOC_Os09g15044
0	0.824517	0.682	0.164	0	Nip	LOC_Os01g01369
0	0.82334	0.577	0.027	0	Nip	LOC_Os07g36410
0	0.820917	0.863	0.51	0	Nip	LOC_Os05g44922
0	0.810412	0.362	0	0	Nip	LOC_Os03g18230
0	0.80678	0.599	0.105	0	Nip	LOC_Os11g35330
0	0.803782	0.499	0.024	0	Nip	LOC_Os05g34500
0	0.803386	0.636	0.149	0	Nip	LOC_Os01g60190
0	0.799594	0.846	0.471	0	Nip	LOC_Os04g44900
0	0.798803	0.582	0.025	0	Nip	LOC_Os03g16480
0	0.792413	0.616	0.116	0	Nip	LOC_Os02g07010
0	0.787493	0.612	0.089	0	Nip	LOC_Os02g51890
0	0.777911	0.627	0.098	0	Nip	LOC_Os01g32080
0	0.776332	0.488	0.007	0	Nip	LOC_Os05g02240
0	0.774216	0.581	0.142	0	Nip	LOC_Os01g25484
0	0.758189	0.507	0.001	0	Nip	LOC_Os11g11960
0	0.75572	0.541	0.001	0	Nip	LOC_Os05g40770
0	0.752549	0.591	0.139	0	Nip	LOC_Os02g33110
0	0.751092	0.55	0	0	Nip	LOC_Os01g50934
0	0.750233	0.991	0.867	0	Nip	LOC_Os11g10480
0	0.74663	0.873	0.602	0	Nip	LOC_Os06g09450
0	0.74202	0.624	0.088	0	Nip	LOC_Os10g32520
0	0.741378	0.704	0.204	0	Nip	LOC_Os06g12690
0	0.737724	0.522	0	0	Nip	LOC_Os03g19040
0	0.728644	0.819	0.526	0	Nip	LOC_Os05g03620
0	0.726943	0.754	0.266	0	Nip	LOC_Os08g04390
0	0.713978	0.617	0.159	0	Nip	LOC_Os05g49880
0	0.71303	0.726	0.269	0	Nip	LOC_Os05g39110
0	0.704045	0.46	0	0	Nip	LOC_Os12g03800
0	0.698654	0.553	0.144	0	Nip	LOC_Os06g47130
0	0.695584	1	0.991	0	Nip	LOC_Os08g37670
0	0.689188	0.39	0	0	Nip	LOC_Os02g26790
0	0.687161	0.453	0.009	0	Nip	LOC_Os07g33997
0	0.682159	0.63	0.231	0	Nip	LOC_Os04g58920
0	0.676686	0.366	0	0	Nip	LOC_Os10g38314
0	0.672791	0.457	0.002	0	Nip	LOC_Os03g25040
0	0.669054	0.527	0.082	0	Nip	LOC_Os03g10640
0	0.656216	0.591	0.11	0	Nip	LOC_Os01g34614
0	0.645483	0.942	0.77	0	Nip	LOC_Os09g31260
0	0.645215	0.513	0	0	Nip	LOC_Os04g23140
0	0.643506	0.515	0	0	Nip	LOC_Os09g32169
0	0.641407	0.486	0	0	Nip	LOC_Os09g27744
0	0.63767	0.515	0.001	0	Nip	LOC_Os04g32330
0	0.636741	0.516	0.067	0	Nip	LOC_Os01g15260
0	0.636052	0.913	0.709	0	Nip	LOC_Os06g23440
0	0.6315	0.45	0.037	0	Nip	LOC_Os10g41460
0	0.630869	0.64	0.177	0	Nip	LOC_Os01g38480
0	0.626645	0.526	0.053	0	Nip	LOC_Os12g10560
0	0.619704	0.431	0	0	Nip	LOC_Os10g35759
0	0.619191	0.426	0.001	0	Nip	LOC_Os10g39410
0	0.616837	0.402	0	0	Nip	LOC_Os10g28254
0	0.606037	0.386	0	0	Nip	LOC_Os05g26630
0	0.603671	0.466	0.032	0	Nip	LOC_Os02g06330
0	0.592564	0.453	0	0	Nip	LOC_Os08g13280
0	0.591921	0.367	0.005	0	Nip	LOC_Os05g40630
0	0.589853	0.395	0	0	Nip	LOC_Os03g37864
0	0.588829	0.435	0	0	Nip	LOC_Os12g15505
0	0.576345	0.528	0.097	0	Nip	LOC_Os07g41820
0	0.574909	0.357	0.001	0	Nip	LOC_Os04g03920
0	0.573172	0.494	0.033	0	Nip	LOC_Os11g36430
0	0.563375	0.397	0	0	Nip	LOC_Os02g38392
0	0.562574	0.906	0.687	0	Nip	LOC_Os06g47340
0	0.558429	0.487	0.084	0	Nip	LOC_Os08g04180
0	0.551193	0.482	0.036	0	Nip	LOC_Os12g16350
0	0.550858	0.451	0.01	0	Nip	LOC_Os01g69850
0	0.538593	0.436	0	0	Nip	LOC_Os01g57250
0	0.5354	0.372	0	0	Nip	LOC_Os10g02270
0	0.533425	0.359	0	0	Nip	LOC_Os11g29500
0	0.529652	0.381	0	0	Nip	LOC_Os07g08934
0	0.526248	0.39	0.001	0	Nip	LOC_Os06g24711
0	0.511368	0.442	0.055	0	Nip	LOC_Os12g37870
0	0.490384	0.35	0	0	Nip	LOC_Os07g12390
0	0.4668	0.387	0.015	0	Nip	LOC_Os03g18820
0	0.461999	0.355	0	0	Nip	LOC_Os01g26070
0	0.45518	0.357	0	0	Nip	LOC_Os12g13674
0	0.45434	0.381	0	0	Nip	LOC_Os03g59740
0	0.43483	0.371	0.002	0	Nip	LOC_Os09g19734
6.03951e-308	1.18462	0.36	0.009	1.56435e-303	Nip	LOC_Os05g37060
1.3232e-307	0.913017	0.624	0.233	3.42736e-303	Nip	LOC_Os05g28740
1.02703e-306	1.19882	0.619	0.245	2.66021e-302	Nip	LOC_Os11g30760
7.94221e-306	0.698963	0.348	0.002	2.05719e-301	Nip	LOC_Os11g13490
5.23398e-305	0.922287	0.51	0.117	1.35571e-300	Nip	LOC_Os02g56460
3.48506e-304	0.427188	0.343	0	9.02699e-300	Nip	LOC_Os03g10700
5.53017e-304	0.772164	0.967	0.917	1.43242e-299	Nip	LOC_Os05g33380
5.53846e-304	0.519244	0.438	0.062	1.43457e-299	Nip	LOC_Os09g23650
9.6157e-302	0.986918	0.946	0.841	2.49066e-297	Nip	LOC_Os12g36210
4.42579e-300	0.67653	0.616	0.229	1.14637e-295	Nip	LOC_Os03g47530
7.83487e-299	0.560026	0.692	0.345	2.02939e-294	Nip	LOC_Os07g12150
4.90862e-297	1.48891	0.631	0.25	1.27143e-292	Nip	LOC_Os08g04340
5.03959e-297	0.741557	0.744	0.398	1.30535e-292	Nip	LOC_Os01g12000
1.3556e-296	0.750876	0.639	0.269	3.51128e-292	Nip	LOC_Os05g01030
2.47146e-296	0.48606	0.335	0	6.40159e-292	Nip	LOC_Os03g56241
3.2858e-295	0.610054	0.501	0.12	8.51088e-291	Nip	LOC_Os10g39870
3.12392e-293	0.617016	0.545	0.165	8.09158e-289	Nip	LOC_Os10g42299
7.53873e-293	0.767951	0.621	0.254	1.95268e-288	Nip	LOC_Os04g31070
1.02132e-292	0.573055	0.456	0.077	2.64542e-288	Nip	LOC_Os02g35490
3.87204e-292	0.925943	0.643	0.256	1.00294e-287	Nip	LOC_Os03g55770
9.10246e-291	0.647648	0.33	0	2.35772e-286	Nip	LOC_Os06g50650
8.27032e-288	0.71422	0.898	0.661	2.14218e-283	Nip	LOC_Os03g08320
1.60132e-287	0.880177	0.541	0.163	4.14774e-283	Nip	LOC_Os06g05930
2.33867e-287	0.57365	0.974	0.882	6.05763e-283	Nip	LOC_Os10g08550
6.68278e-287	0.626947	0.327	0.001	1.73097e-282	Nip	LOC_Os02g57350
2.44007e-286	0.423287	0.326	0	6.32028e-282	Nip	LOC_Os03g32499
1.08195e-283	0.731326	0.513	0.142	2.80246e-279	Nip	LOC_Os04g50970
1.48169e-281	0.515412	0.365	0.024	3.83789e-277	Nip	LOC_Os05g33410
8.61718e-281	0.381553	0.338	0.009	2.23202e-276	Nip	LOC_Os08g37480
8.47825e-279	0.611409	0.609	0.234	2.19604e-274	Nip	LOC_Os06g13870
1.97415e-278	0.583553	0.63	0.251	5.11345e-274	Nip	LOC_Os06g37620
3.16546e-278	0.616299	0.676	0.308	8.19917e-274	Nip	LOC_Os04g37904
3.3275e-278	0.486614	0.318	0	8.6189e-274	Nip	LOC_Os04g36319
1.21505e-277	0.901741	0.857	0.635	3.14724e-273	Nip	LOC_Os08g41470
8.19485e-277	0.943471	0.906	0.752	2.12263e-272	Nip	LOC_Os12g42876
8.3867e-275	0.958086	0.675	0.369	2.17232e-270	Nip	LOC_Os09g36830
1.19322e-274	0.386348	0.318	0.002	3.09067e-270	Nip	LOC_Os06g16270
1.57981e-274	1.18945	0.668	0.323	4.09202e-270	Nip	LOC_Os06g05000
1.70626e-270	0.369333	0.332	0.012	4.41955e-266	Nip	LOC_Os08g13320
2.68375e-270	0.437229	0.361	0.029	6.95145e-266	Nip	LOC_Os02g29550
1.03318e-269	0.610394	0.717	0.381	2.67614e-265	Nip	LOC_Os01g19130
2.24644e-269	0.529008	0.544	0.177	5.81873e-265	Nip	LOC_Os07g26440
2.76958e-269	0.912582	0.67	0.342	7.17376e-265	Nip	LOC_Os05g14240
4.63806e-269	0.420746	0.309	0	1.20135e-264	Nip	LOC_Os07g34620
6.84613e-269	0.683884	0.55	0.186	1.77329e-264	Nip	LOC_Os11g44310
1.5406e-267	0.455654	0.334	0.014	3.99047e-263	Nip	LOC_Os12g24530
3.00253e-266	0.554588	0.306	0	7.77717e-262	Nip	LOC_Os07g33784
6.20498e-265	0.643059	0.687	0.277	1.60721e-260	Nip	LOC_Os03g18850
7.06487e-264	0.584359	0.304	0	1.82994e-259	Nip	EVM0047284
1.24784e-263	0.488681	0.452	0.095	3.23215e-259	Nip	LOC_Os03g03510
1.44348e-263	0.801773	0.915	0.731	3.73889e-259	Nip	LOC_Os04g41960
2.24621e-261	0.462444	0.411	0.067	5.81813e-257	Nip	LOC_Os02g08420
2.72051e-261	0.779133	0.965	0.94	7.04666e-257	Nip	LOC_Os03g07870
9.84781e-261	0.563359	0.889	0.718	2.55078e-256	Nip	LOC_Os03g63770
2.18691e-259	0.474321	0.976	0.904	5.66453e-255	Nip	LOC_Os07g36170
2.28482e-259	0.552993	0.3	0	5.91815e-255	Nip	LOC_Os01g06220
3.50172e-258	0.46734	0.299	0	9.07016e-254	Nip	LOC_Os09g26960
4.77826e-257	0.441626	0.467	0.113	1.23766e-252	Nip	LOC_Os10g41520
5.74497e-257	0.390163	0.31	0.007	1.48806e-252	Nip	LOC_Os05g49420
7.75348e-256	0.555411	0.503	0.15	2.00831e-251	Nip	LOC_Os03g50050
3.26653e-255	0.669164	0.435	0.099	8.46095e-251	Nip	LOC_Os08g38270
4.97902e-254	0.360618	0.294	0	1.28966e-249	Nip	LOC_Os11g28480
8.1281e-254	0.336081	0.294	0	2.10534e-249	Nip	LOC_Os02g53330
1.6852e-253	1.05034	0.299	0.003	4.365e-249	Nip	LOC_Os01g24710
5.29859e-253	0.969996	0.819	0.557	1.37244e-248	Nip	LOC_Os03g26820
5.98591e-253	0.644584	0.356	0.038	1.55047e-248	Nip	LOC_Os02g56700
2.22954e-250	0.507027	0.528	0.172	5.77496e-246	Nip	LOC_Os01g64970
1.50008e-249	0.485022	0.51	0.161	3.8855e-245	Nip	LOC_Os03g19580
1.60347e-249	0.872392	0.789	0.507	4.15332e-245	Nip	LOC_Os01g64520
3.19546e-249	0.426252	0.375	0.049	8.27687e-245	Nip	LOC_Os04g58840
3.26108e-249	0.533744	0.768	0.437	8.44685e-245	Nip	LOC_Os12g04240
1.41847e-248	0.356594	0.304	0.008	3.67412e-244	Nip	LOC_Os05g03820
2.34795e-248	0.39804	0.356	0.036	6.08165e-244	Nip	LOC_Os11g18170
4.0779e-248	0.954702	0.726	0.433	1.05626e-243	Nip	LOC_Os11g47600
1.02558e-247	0.427324	0.341	0.029	2.65647e-243	Nip	LOC_Os08g03440
3.11138e-246	0.726315	0.575	0.245	8.05909e-242	Nip	LOC_Os02g40110
5.6025e-246	0.483015	0.286	0	1.45116e-241	Nip	LOC_Os01g05610
1.91547e-244	0.402254	0.314	0.015	4.96145e-240	Nip	LOC_Os02g46480
5.95022e-243	0.388996	0.304	0.01	1.54123e-238	Nip	LOC_Os02g38340
8.34745e-243	0.777097	0.8	0.542	2.16216e-238	Nip	LOC_Os05g03590
9.7016e-243	0.589387	0.505	0.159	2.51291e-238	Nip	LOC_Os01g66180
1.30557e-242	0.533253	0.283	0	3.3817e-238	Nip	LOC_Os03g15080
4.64928e-242	0.418349	0.327	0.025	1.20426e-237	Nip	LOC_Os08g36170
4.77654e-239	0.340323	0.279	0	1.23722e-234	Nip	LOC_Os12g42884
1.31829e-238	0.77484	0.384	0.07	3.41463e-234	Nip	LOC_Os03g18130
2.44264e-237	0.637005	0.326	0.026	6.32692e-233	Nip	LOC_Os01g51570
1.9509e-236	0.448876	0.411	0.08	5.05323e-232	Nip	LOC_Os04g41560
4.19366e-236	0.429637	0.459	0.116	1.08624e-231	Nip	LOC_Os01g68940
6.46835e-236	0.31351	0.276	0	1.67543e-231	Nip	LOC_Os06g07869
4.27856e-235	0.626453	0.903	0.732	1.10823e-230	Nip	LOC_Os06g45090
4.40502e-235	0.349112	0.275	0	1.14099e-230	Nip	LOC_Os08g13699
7.85829e-235	0.576665	0.413	0.089	2.03545e-230	Nip	LOC_Os05g04210
1.1371e-234	0.376338	0.284	0.004	2.94532e-230	Nip	LOC_Os03g57690
1.19623e-234	0.347791	0.283	0.004	3.09848e-230	Nip	LOC_Os04g01674
1.39833e-234	0.36153	0.33	0.029	3.62195e-230	Nip	LOC_Os04g38480
2.1522e-234	0.736748	0.96	0.916	5.57462e-230	Nip	LOC_Os07g09420
3.31985e-234	0.829108	0.32	0.027	8.59907e-230	Nip	LOC_Os06g04950
3.5494e-234	1.4707	0.388	0.068	9.19366e-230	Nip	LOC_Os03g01309
5.28726e-233	0.418309	0.273	0	1.36951e-228	Nip	LOC_Os02g07709
1.06036e-232	0.534585	0.466	0.134	2.74655e-228	Nip	LOC_Os04g40560
2.05499e-231	0.360054	0.313	0.02	5.32284e-227	Nip	LOC_Os05g33110
2.67617e-231	0.586348	0.817	0.56	6.93182e-227	Nip	LOC_Os03g25270
6.2716e-231	0.427424	0.271	0	1.62447e-226	Nip	LOC_Os07g36504
7.17799e-231	0.374858	0.381	0.062	1.85924e-226	Nip	LOC_Os12g28270
2.77782e-230	0.655868	0.387	0.075	7.1951e-226	Nip	LOC_Os12g25690
3.7592e-230	0.584243	0.58	0.249	9.73709e-226	Nip	LOC_Os05g33940
1.27457e-227	0.319891	0.268	0	3.30138e-223	Nip	LOC_Os01g27009
1.29124e-227	0.377119	0.311	0.022	3.34458e-223	Nip	LOC_Os08g04470
5.14248e-227	0.420049	0.381	0.068	1.33201e-222	Nip	LOC_Os06g01304
1.62352e-226	0.494243	0.332	0.037	4.20524e-222	Nip	LOC_Os05g33570
2.80174e-226	0.453422	0.944	0.806	7.25707e-222	Nip	LOC_Os11g04480
6.07406e-225	0.322644	0.265	0	1.5733e-220	Nip	LOC_Os07g40640
3.26257e-224	0.36015	0.29	0.013	8.4507e-220	Nip	LOC_Os02g39920
4.54495e-224	0.396616	0.409	0.087	1.17723e-219	Nip	LOC_Os01g63470
1.04147e-221	0.475618	0.966	0.877	2.69762e-217	Nip	LOC_Os03g13300
4.81055e-221	0.319526	0.261	0	1.24603e-216	Nip	LOC_Os02g56820
9.53159e-221	0.407149	0.285	0.012	2.46887e-216	Nip	LOC_Os04g01280
5.07144e-220	0.313868	0.26	0	1.3136e-215	Nip	LOC_Os01g71630
8.12021e-220	0.381419	0.26	0	2.1033e-215	Nip	LOC_Os11g45890
1.22801e-218	0.38286	0.402	0.086	3.1808e-214	Nip	LOC_Os07g34640
3.88727e-218	0.363038	0.3	0.022	1.00688e-213	Nip	LOC_Os03g49990
4.05978e-218	0.486429	0.637	0.344	1.05156e-213	Nip	LOC_Os05g09490
2.18215e-217	0.634709	0.773	0.517	5.65221e-213	Nip	LOC_Os10g22520
2.28484e-217	0.372267	0.257	0	5.91821e-213	Nip	LOC_Os05g49684
1.11867e-216	0.329803	0.285	0.014	2.89758e-212	Nip	LOC_Os07g39900
2.82839e-216	0.530654	0.931	0.801	7.32609e-212	Nip	LOC_Os06g36360
4.9758e-216	0.532404	0.734	0.446	1.28883e-211	Nip	LOC_Os01g28680
1.09982e-215	0.318517	0.272	0.008	2.84876e-211	Nip	LOC_Os02g04450
1.00941e-214	0.317338	0.255	0	2.61456e-210	Nip	LOC_Os07g22494
2.59093e-214	0.514536	0.622	0.305	6.71102e-210	Nip	LOC_Os10g33040
2.17056e-213	0.537152	0.426	0.118	5.62219e-209	Nip	LOC_Os03g55970
1.63518e-212	0.306063	0.27	0.009	4.23545e-208	Nip	LOC_Os12g32180
6.97044e-212	0.33392	0.252	0	1.80548e-207	Nip	LOC_Os06g36380
2.57528e-211	0.603912	0.578	0.267	6.6705e-207	Nip	LOC_Os01g32770
8.22484e-211	0.612998	0.99	0.957	2.1304e-206	Nip	LOC_Os03g17690
1.75582e-209	0.330291	0.275	0.013	4.54791e-205	Nip	LOC_Os07g30940
7.74237e-207	0.377311	0.246	0	2.00543e-202	Nip	EVM0011292
2.59841e-206	0.573501	0.331	0.05	6.73039e-202	Nip	LOC_Os01g55110
3.10004e-206	0.506975	0.937	0.781	8.02973e-202	Nip	LOC_Os08g25720
3.17518e-205	0.35886	0.344	0.055	8.22435e-201	Nip	LOC_Os06g37000
5.70091e-205	0.38189	0.323	0.043	1.47665e-200	Nip	LOC_Os04g27860
1.07741e-204	0.353705	0.286	0.022	2.7907e-200	Nip	LOC_Os04g59520
1.45758e-204	0.642662	0.538	0.205	3.77543e-200	Nip	LOC_Os08g05960
2.61025e-203	0.45477	0.329	0.049	6.76106e-199	Nip	LOC_Os03g61060
4.00443e-202	0.430798	0.415	0.107	1.03723e-197	Nip	LOC_Os03g20670
2.38733e-201	0.954273	0.295	0.031	6.18367e-197	Nip	LOC_Os08g33710
3.52659e-201	0.565543	0.558	0.248	9.13458e-197	Nip	LOC_Os03g44636
9.03964e-201	0.456234	0.266	0.013	2.34145e-196	Nip	LOC_Os06g48860
1.26409e-200	0.481609	0.952	0.909	3.27424e-196	Nip	LOC_Os02g41650
1.19984e-199	0.317239	0.259	0.01	3.10781e-195	Nip	LOC_Os07g26000
4.87903e-199	0.391164	0.34	0.057	1.26377e-194	Nip	LOC_Os11g44300
7.89369e-199	0.336573	0.238	0	2.04462e-194	Nip	LOC_Os07g36264
1.08214e-198	0.497868	0.332	0.055	2.80297e-194	Nip	LOC_Os03g06580
2.72132e-197	0.543456	0.839	0.58	7.04877e-193	Nip	LOC_Os01g63690
5.92233e-197	0.367197	0.999	0.994	1.534e-192	Nip	LOC_Os01g21120
7.24009e-197	0.326201	0.319	0.044	1.87533e-192	Nip	LOC_Os03g21550
1.99264e-196	0.800117	0.449	0.146	5.16135e-192	Nip	LOC_Os07g03730
4.6928e-196	0.314755	0.239	0.002	1.21553e-191	Nip	LOC_Os12g43640
8.96065e-196	0.310864	0.293	0.03	2.32099e-191	Nip	LOC_Os06g04130
2.76751e-195	0.29061	0.252	0.009	7.16841e-191	Nip	LOC_Os01g56890
5.12846e-195	0.442354	0.966	0.877	1.32837e-190	Nip	LOC_Os10g22590
3.73322e-194	0.336633	0.301	0.035	9.66979e-190	Nip	LOC_Os05g47470
6.64346e-194	0.69042	0.605	0.326	1.72079e-189	Nip	LOC_Os01g47560
9.46271e-194	0.318966	0.29	0.03	2.45103e-189	Nip	LOC_Os10g39220
6.39068e-193	0.864528	0.864	0.693	1.65531e-188	Nip	LOC_Os01g03340
9.81393e-193	0.687863	0.906	0.82	2.542e-188	Nip	LOC_Os09g19970
1.12091e-192	0.278455	0.232	0	2.90338e-188	Nip	LOC_Os12g07710
1.85825e-192	0.299942	0.253	0.01	4.81324e-188	Nip	LOC_Os03g14540
2.10372e-192	0.377167	0.381	0.094	5.44907e-188	Nip	LOC_Os01g65090
1.09011e-191	0.266994	0.231	0	2.82359e-187	Nip	LOC_Os06g50520
1.05551e-190	0.463102	0.709	0.41	2.73399e-186	Nip	LOC_Os01g64730
1.15827e-190	0.541133	0.575	0.272	3.00015e-186	Nip	LOC_Os05g49020
1.29892e-190	0.348979	0.403	0.104	3.36446e-186	Nip	LOC_Os09g25310
1.32841e-190	0.690531	0.471	0.179	3.44084e-186	Nip	LOC_Os02g41954
1.40831e-190	0.47036	0.583	0.283	3.64779e-186	Nip	LOC_Os03g58750
5.21368e-190	0.364702	0.27	0.021	1.35045e-185	Nip	LOC_Os07g38370
2.60465e-189	0.439193	0.802	0.589	6.74657e-185	Nip	LOC_Os03g07990
6.00069e-189	0.470681	0.758	0.489	1.5543e-184	Nip	LOC_Os01g08700
8.08182e-189	0.719098	0.938	0.896	2.09335e-184	Nip	LOC_Os04g58090
1.32085e-188	0.319013	0.257	0.015	3.42126e-184	Nip	LOC_Os08g06320
1.95527e-188	0.491622	0.284	0.032	5.06455e-184	Nip	LOC_Os06g47620
4.02075e-188	0.593199	0.37	0.09	1.04146e-183	Nip	LOC_Os03g14730
8.8751e-188	0.474601	0.227	0	2.29883e-183	Nip	LOC_Os07g46480
2.42764e-187	0.626742	0.624	0.357	6.28808e-183	Nip	LOC_Os01g54670
2.61647e-187	0.510941	0.77	0.537	6.77719e-183	Nip	LOC_Os06g14180
3.13963e-187	0.671426	0.759	0.532	8.13227e-183	Nip	LOC_Os03g13740
3.30957e-187	0.282089	0.227	0	8.57244e-183	Nip	LOC_Os02g45010
8.14546e-187	0.831061	0.734	0.518	2.10984e-182	Nip	LOC_Os08g19670
1.08869e-186	0.790659	0.876	0.833	2.81993e-182	Nip	LOC_Os02g50730
8.29268e-185	0.256435	0.223	0	2.14797e-180	Nip	LOC_Os10g36340
2.04227e-184	0.397097	0.223	0	5.28989e-180	Nip	LOC_Os06g06490
2.41139e-184	1.08741	0.829	0.72	6.24598e-180	Nip	LOC_Os05g25920
4.51897e-184	0.649284	0.672	0.421	1.1705e-179	Nip	LOC_Os06g14370
5.24891e-184	0.643242	0.861	0.665	1.35957e-179	Nip	LOC_Os08g43550
7.88641e-184	0.269251	0.222	0	2.04274e-179	Nip	LOC_Os11g36190
1.08035e-182	0.665449	0.614	0.331	2.79833e-178	Nip	LOC_Os01g19330
1.20146e-182	0.319963	0.27	0.025	3.11202e-178	Nip	LOC_Os08g41460
1.83785e-182	0.260656	0.221	0	4.76039e-178	Nip	LOC_Os11g15000
1.30841e-181	0.382026	0.296	0.042	3.38905e-177	Nip	LOC_Os09g32960
3.47896e-181	0.437236	0.394	0.112	9.01121e-177	Nip	LOC_Os05g51130
4.25969e-181	0.268361	0.219	0	1.10334e-176	Nip	LOC_Os12g33160
1.92217e-180	0.293785	0.225	0.003	4.9788e-176	Nip	LOC_Os04g35534
3.14889e-180	0.275251	0.236	0.009	8.15625e-176	Nip	LOC_Os02g11830
7.369e-180	0.272507	0.246	0.013	1.90872e-175	Nip	LOC_Os07g07680
1.38853e-179	0.377327	0.457	0.168	3.59656e-175	Nip	LOC_Os03g13970
2.40437e-179	0.267458	0.217	0	6.2278e-175	Nip	LOC_Os08g02864
3.76172e-179	0.268619	0.217	0	9.7436e-175	Nip	LOC_Os05g29170
6.91423e-179	0.272533	0.239	0.011	1.79092e-174	Nip	LOC_Os02g52940
7.09738e-179	0.57553	0.768	0.553	1.83836e-174	Nip	LOC_Os02g40840
7.37936e-179	0.503468	0.531	0.236	1.9114e-174	Nip	LOC_Os04g31804
2.00752e-178	0.524753	0.461	0.176	5.19989e-174	Nip	LOC_Os05g46510
1.0843e-177	0.419932	0.474	0.171	2.80856e-173	Nip	LOC_Os02g15700
5.52292e-177	0.55191	0.357	0.088	1.43055e-172	Nip	LOC_Os08g37840
6.80987e-177	0.399518	0.22	0.003	1.76389e-172	Nip	LOC_Os07g44890
2.02386e-176	0.347601	0.979	0.915	5.2422e-172	Nip	LOC_Os03g16690
2.57628e-176	0.28086	0.271	0.029	6.67308e-172	Nip	LOC_Os03g18700
9.25489e-176	0.489161	0.463	0.175	2.3972e-171	Nip	LOC_Os03g53070
2.12254e-175	0.597509	0.51	0.226	5.4978e-171	Nip	LOC_Os01g24030
5.48665e-175	0.377167	0.241	0.015	1.42115e-170	Nip	LOC_Os03g18770
3.86963e-174	0.275527	0.219	0.003	1.00231e-169	Nip	LOC_Os05g10754
7.5587e-174	0.595719	0.79	0.607	1.95785e-169	Nip	LOC_Os03g04020
5.13472e-173	0.339731	0.355	0.082	1.33e-168	Nip	LOC_Os11g11770
1.02585e-172	0.275406	0.219	0.004	2.65717e-168	Nip	LOC_Os03g52450
2.23201e-172	0.260006	0.21	0	5.78136e-168	Nip	LOC_Os05g36340
2.43397e-172	0.423164	0.62	0.334	6.30447e-168	Nip	LOC_Os05g27340
5.41974e-172	0.301702	0.209	0	1.40382e-167	Nip	LOC_Os02g56440
5.41974e-172	0.246998	0.209	0	1.40382e-167	Nip	LOC_Os09g20820
9.11668e-171	0.345771	0.337	0.076	2.3614e-166	Nip	LOC_Os09g27700
1.20494e-170	0.281203	0.208	0	3.12104e-166	Nip	LOC_Os07g13834
1.73346e-170	0.414299	0.43	0.149	4.49e-166	Nip	LOC_Os02g58640
2.09545e-170	0.240571	0.212	0.002	5.42764e-166	Nip	LOC_Os08g11220
3.82447e-169	0.596454	0.85	0.642	9.90615e-165	Nip	LOC_Os04g09570
6.81673e-169	0.867176	0.784	0.567	1.76567e-164	Nip	LOC_Os07g47620
7.5334e-169	0.383437	0.974	0.934	1.9513e-164	Nip	LOC_Os03g18220
9.7102e-169	0.783621	0.301	0.055	2.51514e-164	Nip	LOC_Os02g42450
4.74405e-168	1.48303	0.582	0.309	1.2288e-163	Nip	LOC_Os03g46060
5.64626e-168	0.304935	0.261	0.028	1.46249e-163	Nip	LOC_Os12g37910
1.38082e-167	0.246777	0.233	0.013	3.57659e-163	Nip	LOC_Os03g62110
1.78543e-167	0.249768	0.207	0.001	4.62462e-163	Nip	LOC_Os08g04010
2.29655e-167	0.41498	0.318	0.066	5.94852e-163	Nip	LOC_Os10g25900
3.2953e-167	0.426473	0.626	0.353	8.53548e-163	Nip	LOC_Os01g70170
5.3133e-167	0.274483	0.204	0	1.37625e-162	Nip	LOC_Os05g35444
6.78838e-167	0.324857	0.342	0.079	1.75833e-162	Nip	LOC_Os02g39010
1.50687e-166	0.535397	0.671	0.399	3.90309e-162	Nip	LOC_Os02g51710
2.14562e-166	0.273849	0.26	0.029	5.55757e-162	Nip	LOC_Os05g48240
4.80375e-166	0.460915	0.203	0	1.24427e-161	Nip	LOC_Os01g06740
5.67277e-166	0.557938	0.592	0.352	1.46936e-161	Nip	LOC_Os03g32170
1.3976e-165	0.25681	0.228	0.012	3.62005e-161	Nip	LOC_Os10g30600
2.51071e-164	0.269846	0.201	0	6.50325e-160	Nip	LOC_Os06g41240
1.45287e-163	0.232058	0.2	0	3.76321e-159	Nip	LOC_Os09g32640
1.45287e-163	0.228373	0.2	0	3.76321e-159	Nip	LOC_Os09g20579
1.74932e-163	0.481841	0.365	0.107	4.53109e-159	Nip	LOC_Os05g45840
4.01736e-163	0.451781	0.864	0.732	1.04058e-158	Nip	LOC_Os01g09030
4.51116e-163	0.285609	0.996	0.992	1.16848e-158	Nip	LOC_Os06g07969
1.17477e-162	0.931876	0.623	0.396	3.04288e-158	Nip	LOC_Os06g05430
1.29231e-162	0.408927	0.785	0.556	3.34735e-158	Nip	LOC_Os02g54160
2.01585e-162	0.229371	0.199	0	5.22145e-158	Nip	LOC_Os11g19800
4.55421e-162	0.575973	0.964	0.927	1.17963e-157	Nip	LOC_Os05g37970
4.75768e-162	0.273629	0.241	0.022	1.23234e-157	Nip	LOC_Os01g43895
1.55898e-161	0.253158	0.225	0.013	4.03808e-157	Nip	LOC_Os03g22420
2.67444e-161	0.447905	0.844	0.638	6.92732e-157	Nip	LOC_Os03g50030
3.98568e-161	0.495674	0.957	0.867	1.03237e-156	Nip	LOC_Os05g48010
1.06032e-160	0.706599	0.351	0.093	2.74643e-156	Nip	LOC_Os09g10010
3.8358e-160	0.232684	0.196	0	9.93548e-156	Nip	LOC_Os10g35100
3.36045e-159	0.413085	0.536	0.252	8.70423e-155	Nip	LOC_Os02g08090
1.00954e-158	0.831464	0.437	0.169	2.61492e-154	Nip	LOC_Os10g34930
1.94528e-158	0.243637	0.194	0	5.03866e-154	Nip	LOC_Os05g13810
7.59996e-158	0.686102	0.82	0.728	1.96854e-153	Nip	LOC_Os03g04370
1.21057e-157	1.00363	0.585	0.332	3.13563e-153	Nip	LOC_Os10g38340
1.46641e-157	0.39018	0.498	0.219	3.79831e-153	Nip	LOC_Os03g14450
2.65235e-157	0.235731	0.193	0	6.87012e-153	Nip	LOC_Os05g32474
9.31221e-157	0.281469	0.262	0.036	2.41205e-152	Nip	LOC_Os03g56000
2.33035e-156	0.644613	0.361	0.104	6.03606e-152	Nip	LOC_Os08g07690
7.30165e-156	0.338314	0.273	0.045	1.89127e-151	Nip	LOC_Os01g18670
7.56143e-156	0.229304	0.197	0.002	1.95856e-151	Nip	LOC_Os10g41534
8.35082e-156	0.273956	0.254	0.033	2.16303e-151	Nip	LOC_Os03g03420
9.0318e-156	0.842196	0.848	0.687	2.33942e-151	Nip	LOC_Os02g39330
2.04638e-155	0.22288	0.191	0	5.30053e-151	Nip	LOC_Os08g42290
3.18592e-155	0.307325	0.217	0.013	8.25217e-151	Nip	LOC_Os05g11810
3.80395e-155	0.256385	0.238	0.023	9.853e-151	Nip	LOC_Os03g45220
8.89453e-155	0.637329	0.625	0.354	2.30386e-150	Nip	LOC_Os01g50840
1.19225e-154	0.288542	0.256	0.034	3.08817e-150	Nip	LOC_Os06g01200
2.30005e-154	0.342681	0.273	0.046	5.95759e-150	Nip	LOC_Os04g24140
4.55372e-154	0.660724	0.321	0.079	1.1795e-149	Nip	LOC_Os07g34720
2.5075e-153	0.398746	0.857	0.693	6.49493e-149	Nip	LOC_Os02g57260
3.17996e-153	0.365871	0.271	0.046	8.23673e-149	Nip	LOC_Os06g39880
3.29736e-153	0.265835	0.209	0.009	8.54081e-149	Nip	LOC_Os09g18450
7.67514e-153	0.44633	0.717	0.459	1.98802e-148	Nip	LOC_Os03g48626
1.15655e-152	0.765823	0.486	0.223	2.99569e-148	Nip	LOC_Os01g65880
4.65156e-151	0.254443	0.224	0.019	1.20485e-146	Nip	LOC_Os08g34950
6.96249e-151	0.321261	0.196	0.005	1.80343e-146	Nip	LOC_Os02g52380
8.67893e-151	0.52797	0.796	0.603	2.24802e-146	Nip	LOC_Os05g38140
1.81571e-150	1.06255	0.616	0.415	4.70305e-146	Nip	LOC_Os05g48900
2.99937e-150	0.281489	0.291	0.058	7.76898e-146	Nip	LOC_Os04g35700
3.4492e-150	0.252343	0.186	0	8.93412e-146	Nip	LOC_Os04g11980
4.70161e-150	0.237255	0.21	0.012	1.21781e-145	Nip	LOC_Os09g16714
5.72891e-150	0.258771	0.185	0	1.4839e-145	Nip	LOC_Os01g08069
6.94605e-150	0.359324	0.438	0.17	1.79916e-145	Nip	LOC_Os12g41500
1.35612e-149	0.265836	0.184	0	3.51263e-145	Nip	LOC_Os02g56930
2.05533e-149	0.346826	0.21	0.012	5.32373e-145	Nip	LOC_Os07g10440
2.83442e-149	0.430591	0.907	0.755	7.34172e-145	Nip	LOC_Os06g11150
7.0753e-149	0.374273	0.782	0.558	1.83265e-144	Nip	LOC_Os01g67054
1.16698e-148	0.312198	0.183	0	3.0227e-144	Nip	LOC_Os08g30554
9.77827e-148	0.216702	0.197	0.007	2.53277e-143	Nip	LOC_Os07g37760
1.5109e-147	0.31487	0.998	0.997	3.91353e-143	Nip	LOC_Os01g67860
1.54299e-147	0.240501	0.204	0.011	3.99665e-143	Nip	LOC_Os12g41820
3.18591e-147	0.337639	0.377	0.121	8.25215e-143	Nip	LOC_Os06g30750
4.53872e-147	0.466686	0.418	0.163	1.17562e-142	Nip	LOC_Os10g27174
7.37457e-147	0.647339	0.686	0.484	1.91016e-142	Nip	LOC_Os11g05860
2.52137e-146	0.730602	0.609	0.365	6.53086e-142	Nip	LOC_Os07g08710
5.41246e-146	0.655114	0.846	0.654	1.40193e-141	Nip	LOC_Os04g31520
6.35504e-146	0.523798	0.816	0.651	1.64608e-141	Nip	LOC_Os01g50370
7.29706e-146	0.299709	0.304	0.071	1.89008e-141	Nip	LOC_Os05g46200
1.24724e-145	0.487778	0.478	0.217	3.23061e-141	Nip	LOC_Os03g21370
1.72445e-145	0.292746	0.18	0	4.46668e-141	Nip	LOC_Os02g50470
3.78556e-145	0.283557	0.228	0.024	9.80537e-141	Nip	LOC_Os11g29400
6.07272e-145	0.366217	0.56	0.291	1.57295e-140	Nip	LOC_Os10g20630
8.56819e-145	0.464457	0.315	0.079	2.21933e-140	Nip	LOC_Os07g46852
5.7011e-144	0.589835	0.694	0.491	1.4767e-139	Nip	LOC_Os04g37790
1.5217e-143	0.289677	0.21	0.016	3.9415e-139	Nip	LOC_Os05g33100
2.92434e-143	0.216282	0.177	0	7.57464e-139	Nip	LOC_Os02g46360
4.42267e-143	0.214919	0.179	0.001	1.14556e-138	Nip	LOC_Os04g50940
8.94669e-143	0.570312	0.737	0.509	2.31737e-138	Nip	LOC_Os11g44810
1.70133e-142	0.71993	0.727	0.493	4.40679e-138	Nip	LOC_Os05g38040
2.47168e-142	0.208885	0.176	0	6.40214e-138	Nip	LOC_Os01g65692
3.76215e-142	0.416846	0.76	0.538	9.74472e-138	Nip	LOC_Os03g52340
5.00139e-142	0.496663	0.344	0.104	1.29546e-137	Nip	LOC_Os01g58850
9.60031e-142	0.408439	0.703	0.461	2.48667e-137	Nip	LOC_Os01g15010
2.24886e-141	0.352577	0.572	0.298	5.825e-137	Nip	LOC_Os03g57420
2.26462e-141	0.436567	0.551	0.292	5.86582e-137	Nip	LOC_Os01g21590
2.42705e-141	0.290367	0.187	0.005	6.28653e-137	Nip	LOC_Os01g40560
4.44136e-141	0.477534	0.889	0.711	1.1504e-136	Nip	LOC_Os01g62244
1.75186e-140	0.226985	0.174	0	4.53766e-136	Nip	LOC_Os08g06415
4.95235e-140	0.504097	0.822	0.642	1.28276e-135	Nip	LOC_Os03g29770
5.37009e-140	0.445419	0.468	0.211	1.39096e-135	Nip	LOC_Os11g26190
6.27714e-140	0.397271	0.174	0	1.62591e-135	Nip	LOC_Os12g33300
1.77403e-139	0.201876	0.174	0	4.5951e-135	Nip	LOC_Os03g63999
2.28779e-139	0.335729	0.39	0.141	5.92584e-135	Nip	LOC_Os11g34270
4.40776e-139	0.308784	0.259	0.047	1.1417e-134	Nip	LOC_Os07g10460
5.25564e-139	0.2434	0.173	0	1.36132e-134	Nip	LOC_Os11g28600
8.54635e-139	0.224193	1	1	2.21368e-134	Nip	LOC_Os01g15270
1.93449e-138	0.48815	0.729	0.504	5.01071e-134	Nip	LOC_Os03g20630
1.94466e-138	0.483633	0.173	0	5.03706e-134	Nip	LOC_Os07g39320
4.08065e-138	0.703551	0.344	0.117	1.05697e-133	Nip	LOC_Os09g27260
7.48211e-138	0.237655	0.204	0.016	1.93802e-133	Nip	LOC_Os05g30010
8.84798e-138	0.407759	0.617	0.361	2.2918e-133	Nip	LOC_Os01g67220
1.65549e-137	0.30614	0.172	0.001	4.28806e-133	Nip	LOC_Os12g43380
1.87912e-137	0.210922	0.191	0.009	4.8673e-133	Nip	LOC_Os08g13930
6.34296e-137	0.22681	0.181	0.005	1.64295e-132	Nip	LOC_Os05g34110
8.4484e-137	0.346763	0.26	0.048	2.1883e-132	Nip	LOC_Os02g33590
9.34283e-137	0.39212	0.631	0.383	2.41998e-132	Nip	LOC_Os03g05760
2.45629e-136	0.210842	0.197	0.013	6.36228e-132	Nip	LOC_Os04g42000
6.8344e-136	0.389968	0.542	0.276	1.77025e-131	Nip	LOC_Os11g08300
1.0803e-135	0.235449	0.169	0	2.79818e-131	Nip	LOC_Os06g05424
2.12479e-135	0.201236	0.194	0.012	5.50363e-131	Nip	LOC_Os07g35870
2.56208e-135	0.487095	0.829	0.663	6.63629e-131	Nip	LOC_Os03g19260
3.60949e-135	0.338084	0.386	0.141	9.34931e-131	Nip	LOC_Os06g06910
3.3052e-134	0.225562	0.214	0.022	8.56113e-130	Nip	LOC_Os03g10060
3.95787e-134	0.244085	0.198	0.015	1.02517e-129	Nip	LOC_Os12g16200
7.59532e-134	0.40291	0.594	0.344	1.96734e-129	Nip	LOC_Os04g33190
1.12485e-133	0.417027	0.331	0.104	2.9136e-129	Nip	LOC_Os03g55800
2.14782e-133	0.21807	0.208	0.02	5.56328e-129	Nip	LOC_Os05g06700
2.83682e-133	0.554603	0.609	0.379	7.34793e-129	Nip	LOC_Os11g35310
3.17585e-133	0.241435	0.228	0.031	8.22607e-129	Nip	LOC_Os03g64320
6.06899e-133	0.261199	0.166	0	1.57199e-128	Nip	LOC_Os08g06210
1.66375e-132	0.395349	0.279	0.064	4.30945e-128	Nip	LOC_Os04g38790
1.75543e-132	0.383237	0.283	0.066	4.54691e-128	Nip	LOC_Os09g25070
1.43842e-130	0.220949	0.163	0	3.72579e-126	Nip	LOC_Os12g15909
5.94673e-130	0.231698	0.192	0.013	1.54032e-125	Nip	LOC_Os09g04339
1.31631e-129	0.203574	0.184	0.01	3.40949e-125	Nip	LOC_Os12g41250
7.6203e-129	0.281164	0.297	0.078	1.97381e-124	Nip	LOC_Os08g33920
4.03815e-128	0.339121	0.494	0.248	1.04596e-123	Nip	LOC_Os06g14490
5.63435e-128	0.712018	0.77	0.615	1.45941e-123	Nip	LOC_Os03g60210
8.98904e-128	0.33727	0.531	0.277	2.32834e-123	Nip	LOC_Os05g30810
1.31394e-127	0.427316	0.477	0.243	3.40337e-123	Nip	LOC_Os10g30850
6.4065e-127	0.277276	0.318	0.094	1.65941e-122	Nip	LOC_Os01g42770
6.48068e-127	0.360331	0.941	0.873	1.67862e-122	Nip	LOC_Os05g13580
9.50704e-127	0.225083	0.158	0	2.46251e-122	Nip	LOC_Os02g01870
1.3217e-126	0.226656	0.237	0.04	3.42345e-122	Nip	LOC_Os06g49505
2.11455e-126	1.71125	0.885	0.801	5.47712e-122	Nip	LOC_Os10g40530
2.51903e-126	0.277808	0.179	0.01	6.52479e-122	Nip	LOC_Os03g48960
3.17635e-126	0.450292	0.245	0.049	8.22739e-122	Nip	LOC_Os12g39310
3.32793e-126	0.203356	0.158	0	8.62e-122	Nip	LOC_Os01g06510
5.40653e-126	0.314049	0.236	0.04	1.4004e-121	Nip	LOC_Os10g37660
6.23668e-126	0.428944	0.763	0.619	1.61543e-121	Nip	LOC_Os03g55850
7.09082e-126	0.459995	0.526	0.291	1.83666e-121	Nip	LOC_Os10g41490
8.04294e-126	0.597275	0.549	0.315	2.08328e-121	Nip	LOC_Os05g30500
1.03666e-125	0.454733	0.387	0.147	2.68516e-121	Nip	LOC_Os01g42190
3.32626e-125	0.519304	0.727	0.498	8.61569e-121	Nip	LOC_Os04g47310
1.97739e-124	0.459229	0.294	0.083	5.12183e-120	Nip	LOC_Os01g03360
3.265e-124	0.210509	0.155	0	8.45699e-120	Nip	LOC_Os12g36060
1.24784e-123	0.336397	0.454	0.216	3.23216e-119	Nip	LOC_Os06g48040
1.45671e-123	0.512588	0.826	0.688	3.77316e-119	Nip	LOC_Os11g44940
2.49347e-123	0.230265	0.195	0.019	6.45859e-119	Nip	LOC_Os09g34150
1.03472e-122	0.345181	0.98	0.938	2.68013e-118	Nip	LOC_Os04g56100
2.00511e-122	0.390605	0.172	0.008	5.19364e-118	Nip	LOC_Os09g36850
3.14699e-122	0.517531	0.573	0.365	8.15134e-118	Nip	LOC_Os01g07370
3.42719e-122	0.33606	0.604	0.377	8.87711e-118	Nip	LOC_Os02g42320
3.86849e-122	0.32416	0.437	0.198	1.00202e-117	Nip	LOC_Os11g13810
4.72498e-122	0.277214	0.186	0.016	1.22386e-117	Nip	LOC_Os10g37100
5.50187e-122	0.432783	0.981	0.957	1.42509e-117	Nip	LOC_Os04g55920
5.60166e-122	0.246588	0.255	0.054	1.45094e-117	Nip	LOC_Os06g47890
8.45924e-122	0.333919	0.295	0.085	2.19111e-117	Nip	LOC_Os07g48550
9.52332e-122	0.207712	0.193	0.019	2.46673e-117	Nip	LOC_Os03g61710
3.05104e-121	0.546227	0.242	0.047	7.9028e-117	Nip	LOC_Os05g03960
3.70956e-121	0.355759	0.305	0.094	9.60849e-117	Nip	LOC_Os03g03440
3.85611e-121	0.262404	0.286	0.077	9.9881e-117	Nip	LOC_Os06g36160
3.906e-121	0.354919	0.842	0.76	1.01173e-116	Nip	LOC_Os10g17280
5.3377e-121	0.238003	0.259	0.058	1.38257e-116	Nip	LOC_Os05g40820
1.18354e-120	0.332069	0.91	0.774	3.06559e-116	Nip	LOC_Os02g27360
1.20428e-120	0.316775	0.248	0.053	3.11933e-116	Nip	LOC_Os11g30430
1.48699e-120	0.46071	0.839	0.723	3.85161e-116	Nip	LOC_Os03g02530
2.20303e-120	0.216694	0.187	0.017	5.70628e-116	Nip	LOC_Os09g22510
2.25143e-120	0.344401	0.395	0.16	5.83167e-116	Nip	LOC_Os03g27280
3.84018e-120	0.227365	0.259	0.059	9.94685e-116	Nip	LOC_Os07g32450
6.35581e-120	0.347912	0.621	0.392	1.64628e-115	Nip	LOC_Os04g37690
1.43826e-119	0.325812	0.36	0.135	3.72539e-115	Nip	LOC_Os04g51880
5.1785e-119	0.2667	0.304	0.09	1.34134e-114	Nip	LOC_Os03g61990
6.86501e-119	0.349018	0.346	0.126	1.77818e-114	Nip	LOC_Os04g52890
9.2547e-119	0.266976	0.282	0.077	2.39715e-114	Nip	LOC_Os02g39030
7.2908e-118	0.376021	0.372	0.154	1.88846e-113	Nip	LOC_Os04g47120
8.46146e-118	0.402966	0.239	0.049	2.19169e-113	Nip	LOC_Os04g39350
1.14089e-117	0.321354	0.993	0.982	2.95514e-113	Nip	LOC_Os05g08420
1.27628e-117	0.269885	0.21	0.032	3.30582e-113	Nip	LOC_Os06g47530
1.2884e-117	0.283245	0.362	0.138	3.33722e-113	Nip	LOC_Os04g48410
7.76753e-117	0.206812	0.147	0	2.01194e-112	Nip	LOC_Os04g10214
1.11269e-116	0.382064	0.896	0.763	2.88208e-112	Nip	LOC_Os10g07440
3.37579e-116	0.361518	0.308	0.1	8.74396e-112	Nip	LOC_Os04g46980
4.25174e-116	0.710888	0.441	0.217	1.10129e-111	Nip	LOC_Os04g59150
4.43419e-116	0.432389	0.871	0.733	1.14854e-111	Nip	LOC_Os08g31090
6.0922e-116	0.261091	0.146	0	1.578e-111	Nip	LOC_Os12g14540
6.89566e-116	0.562381	0.242	0.052	1.78611e-111	Nip	LOC_Os04g39010
9.29943e-116	0.245968	0.218	0.037	2.40874e-111	Nip	LOC_Os05g43830
1.32208e-115	0.319947	0.578	0.349	3.42445e-111	Nip	LOC_Os09g23160
3.1592e-115	0.287499	0.145	0	8.18296e-111	Nip	LOC_Os10g02394
5.92246e-115	0.348795	0.523	0.286	1.53403e-110	Nip	LOC_Os04g32650
1.52369e-114	0.69372	0.452	0.221	3.94667e-110	Nip	LOC_Os03g52860
1.5545e-114	0.208061	0.177	0.015	4.02646e-110	Nip	LOC_Os08g04440
2.34749e-114	0.301659	0.933	0.83	6.08048e-110	Nip	LOC_Os11g05110
2.938e-114	0.385687	0.434	0.204	7.61001e-110	Nip	LOC_Os12g09540
7.10163e-114	0.277755	0.318	0.106	1.83946e-109	Nip	LOC_Os04g55640
2.65806e-113	0.351519	0.183	0.02	6.8849e-109	Nip	LOC_Os03g53900
3.96836e-113	0.375617	0.264	0.067	1.02789e-108	Nip	LOC_Os02g26720
5.31442e-113	0.963922	0.505	0.268	1.37654e-108	Nip	LOC_Os03g01300
5.86778e-113	0.545413	0.539	0.328	1.51987e-108	Nip	LOC_Os07g48730
1.01753e-112	0.285782	0.159	0.008	2.63559e-108	Nip	LOC_Os01g32460
1.29055e-112	0.433544	0.72	0.542	3.34278e-108	Nip	LOC_Os01g02920
1.78826e-112	0.200088	0.2	0.029	4.63195e-108	Nip	LOC_Os01g51380
9.45922e-112	0.381528	0.354	0.137	2.45013e-107	Nip	LOC_Os02g55890
3.11553e-111	0.260246	0.277	0.077	8.06984e-107	Nip	LOC_Os11g32260
3.31494e-111	0.351216	0.562	0.333	8.58636e-107	Nip	LOC_Os01g69100
4.10948e-111	0.668075	0.625	0.458	1.06444e-106	Nip	LOC_Os09g29960
4.26091e-111	0.472381	0.784	0.648	1.10366e-106	Nip	LOC_Os02g34410
9.07987e-111	0.370103	0.571	0.349	2.35187e-106	Nip	LOC_Os03g40010
9.85226e-111	0.668152	0.257	0.069	2.55193e-106	Nip	LOC_Os01g11150
1.33526e-110	0.296711	0.271	0.077	3.45858e-106	Nip	LOC_Os11g34080
1.34403e-110	0.40588	0.313	0.106	3.48132e-106	Nip	LOC_Os10g25550
1.35684e-110	0.224995	0.222	0.043	3.51448e-106	Nip	LOC_Os10g37240
1.9257e-110	0.26479	0.192	0.026	4.98794e-106	Nip	LOC_Os04g43760
2.14211e-110	0.217539	0.22	0.042	5.54849e-106	Nip	LOC_Os03g09100
2.62711e-110	0.352676	0.785	0.613	6.80475e-106	Nip	LOC_Os06g11800
4.58118e-110	0.262108	0.139	0	1.18662e-105	Nip	LOC_Os01g28980
1.00007e-109	0.381374	0.587	0.354	2.59039e-105	Nip	LOC_Os05g15530
3.51533e-109	0.574184	0.514	0.297	9.1054e-105	Nip	LOC_Os01g03390
3.54718e-109	0.581804	0.441	0.235	9.1879e-105	Nip	LOC_Os09g28580
3.5808e-109	0.348446	0.283	0.087	9.27498e-105	Nip	LOC_Os03g33090
6.54175e-109	0.67164	0.447	0.244	1.69444e-104	Nip	LOC_Os03g08880
1.42185e-108	0.235931	0.221	0.043	3.68287e-104	Nip	LOC_Os02g52480
3.91674e-108	0.378041	0.707	0.554	1.01451e-103	Nip	LOC_Os03g16150
1.56318e-107	0.479598	0.359	0.149	4.04894e-103	Nip	LOC_Os01g41900
2.7013e-107	0.421871	0.592	0.366	6.99692e-103	Nip	LOC_Os01g71970
1.19892e-106	0.457443	0.738	0.599	3.10544e-102	Nip	LOC_Os01g15029
2.90666e-106	0.267413	0.383	0.165	7.52883e-102	Nip	LOC_Os06g46700
7.00405e-106	0.321798	0.462	0.232	1.81419e-101	Nip	LOC_Os04g41229
7.84444e-106	0.215805	0.193	0.029	2.03187e-101	Nip	LOC_Os05g45110
1.19281e-105	0.251989	0.186	0.026	3.08961e-101	Nip	LOC_Os05g50500
2.31757e-105	0.275971	0.6	0.353	6.00298e-101	Nip	LOC_Os07g14270
3.73678e-105	0.354812	0.524	0.292	9.679e-101	Nip	LOC_Os09g21380
1.23897e-104	0.535674	0.412	0.2	3.20918e-100	Nip	LOC_Os01g67950
1.94722e-104	0.301912	0.673	0.468	5.04369e-100	Nip	LOC_Os09g33810
1.9475e-104	0.242324	0.274	0.083	5.04442e-100	Nip	LOC_Os10g39810
3.68147e-104	0.337055	0.147	0.007	9.53574e-100	Nip	LOC_Os06g51060
3.77241e-104	0.481175	0.314	0.113	9.7713e-100	Nip	LOC_Os01g53990
9.57775e-104	0.511637	0.423	0.208	2.48083e-99	Nip	LOC_Os09g23570
1.09198e-103	0.284157	0.501	0.272	2.82844e-99	Nip	LOC_Os02g58070
1.64259e-103	0.21748	0.16	0.013	4.25463e-99	Nip	LOC_Os06g33710
2.08225e-103	0.202631	0.168	0.017	5.39343e-99	Nip	LOC_Os10g26730
4.86279e-103	0.334673	0.359	0.15	1.25956e-98	Nip	LOC_Os05g08900
7.96622e-103	0.371168	0.389	0.18	2.06341e-98	Nip	LOC_Os01g65920
8.19671e-103	0.245836	0.235	0.057	2.12311e-98	Nip	LOC_Os04g01250
2.28205e-102	0.62659	0.403	0.214	5.91096e-98	Nip	LOC_Os03g13540
3.35032e-102	0.323642	0.445	0.225	8.678e-98	Nip	LOC_Os01g34700
5.16216e-102	0.418449	0.652	0.467	1.3371e-97	Nip	LOC_Os06g14190
8.75277e-102	0.318089	0.227	0.055	2.26714e-97	Nip	LOC_Os06g48850
1.50854e-101	0.378076	0.459	0.26	3.90741e-97	Nip	LOC_Os02g49980
1.85451e-101	0.447978	0.93	0.888	4.80356e-97	Nip	LOC_Os07g38170
2.11444e-101	0.242091	0.156	0.012	5.47683e-97	Nip	LOC_Os10g13700
2.22347e-101	0.314491	0.47	0.252	5.75924e-97	Nip	LOC_Os08g26870
2.268e-101	0.202656	0.133	0.002	5.87457e-97	Nip	LOC_Os10g38780
2.49052e-101	0.260208	0.249	0.068	6.45096e-97	Nip	LOC_Os01g51890
1.23657e-100	0.464617	0.58	0.395	3.20297e-96	Nip	LOC_Os03g36650
1.49812e-100	0.216627	0.226	0.051	3.88042e-96	Nip	LOC_Os07g22350
2.29961e-100	0.340983	0.845	0.719	5.95646e-96	Nip	LOC_Os03g53230
2.45109e-100	0.248064	0.977	0.943	6.34882e-96	Nip	LOC_Os01g59440
2.67544e-100	0.366782	0.617	0.412	6.92993e-96	Nip	LOC_Os07g47290
2.93841e-100	0.370363	0.701	0.477	7.61108e-96	Nip	LOC_Os01g50870
4.15982e-100	0.322073	0.47	0.255	1.07748e-95	Nip	LOC_Os01g06600
5.71906e-100	0.471468	0.428	0.23	1.48135e-95	Nip	LOC_Os01g52110
2.278e-99	0.200376	0.24	0.062	5.90047e-95	Nip	LOC_Os02g21460
2.53598e-99	0.209138	0.171	0.021	6.56869e-95	Nip	LOC_Os10g22570
3.99991e-99	0.30461	0.879	0.796	1.03606e-94	Nip	LOC_Os02g33080
5.95673e-99	0.312065	0.466	0.255	1.54291e-94	Nip	LOC_Os10g21560
6.64463e-99	0.266625	0.209	0.044	1.72109e-94	Nip	LOC_Os06g40210
9.33863e-99	0.398828	0.911	0.835	2.41889e-94	Nip	LOC_Os01g67030
1.72779e-98	0.209286	0.201	0.039	4.47533e-94	Nip	LOC_Os06g37610
2.23208e-98	0.254576	0.331	0.131	5.78153e-94	Nip	LOC_Os06g42700
2.38068e-98	0.262357	0.209	0.045	6.16645e-94	Nip	LOC_Os07g14740
2.9924e-98	0.237809	0.24	0.063	7.75091e-94	Nip	LOC_Os04g36670
3.1582e-98	0.407082	0.976	0.948	8.18037e-94	Nip	LOC_Os08g37660
5.4842e-98	0.507839	0.769	0.598	1.42052e-93	Nip	LOC_Os11g04560
7.15361e-98	0.324963	0.84	0.712	1.85293e-93	Nip	LOC_Os09g26420
7.82761e-98	0.260164	0.264	0.08	2.02751e-93	Nip	LOC_Os04g46390
9.48042e-98	0.238802	0.296	0.104	2.45562e-93	Nip	LOC_Os12g01260
9.72775e-98	0.314146	0.441	0.225	2.51968e-93	Nip	LOC_Os01g07780
1.20482e-97	0.205146	0.153	0.013	3.12072e-93	Nip	LOC_Os04g01310
1.20597e-97	0.204995	0.258	0.075	3.12371e-93	Nip	LOC_Os01g49529
2.74814e-97	0.219841	0.251	0.071	7.11823e-93	Nip	LOC_Os06g05400
2.87527e-97	0.632984	0.289	0.105	7.44753e-93	Nip	LOC_Os06g40170
6.59209e-97	0.325969	0.335	0.135	1.70748e-92	Nip	LOC_Os12g08810
8.55725e-97	0.5439	0.871	0.762	2.2165e-92	Nip	LOC_Os07g47510
9.54721e-97	0.212944	0.999	0.995	2.47292e-92	Nip	LOC_Os06g51220
1.19526e-96	0.436318	0.277	0.094	3.09596e-92	Nip	LOC_Os01g11240
1.5616e-96	0.301083	0.682	0.494	4.04486e-92	Nip	LOC_Os08g09250
3.8964e-96	0.34389	0.174	0.026	1.00925e-91	Nip	LOC_Os06g12740
2.38519e-95	0.267014	0.417	0.209	6.17813e-91	Nip	LOC_Os02g57600
1.48728e-94	0.481361	0.945	0.813	3.85236e-90	Nip	LOC_Os01g21250
1.8374e-94	0.340175	0.737	0.569	4.75925e-90	Nip	LOC_Os03g22770
7.63676e-94	0.442347	0.329	0.135	1.97807e-89	Nip	LOC_Os03g55680
2.2974e-93	0.350725	0.749	0.587	5.95073e-89	Nip	LOC_Os09g20350
2.38288e-93	0.2942	0.171	0.026	6.17213e-89	Nip	LOC_Os06g19070
2.45734e-93	0.471256	0.199	0.042	6.365e-89	Nip	LOC_Os03g18030
3.57122e-93	0.43827	0.998	0.997	9.25017e-89	Nip	LOC_Os07g03279
5.68789e-93	0.301926	0.468	0.253	1.47328e-88	Nip	LOC_Os04g48840
9.38383e-93	0.307185	0.391	0.189	2.4306e-88	Nip	LOC_Os08g32060
1.94323e-92	0.310476	0.977	0.967	5.03337e-88	Nip	LOC_Os03g55320
3.52988e-92	0.266122	0.941	0.865	9.14309e-88	Nip	LOC_Os12g05110
3.71559e-92	0.564354	0.719	0.539	9.62413e-88	Nip	LOC_Os06g04990
4.04326e-92	0.684706	0.462	0.272	1.04729e-87	Nip	LOC_Os04g37550
4.12884e-92	0.325911	0.87	0.78	1.06945e-87	Nip	LOC_Os06g13810
4.39562e-92	0.435275	0.414	0.218	1.13855e-87	Nip	LOC_Os01g57854
5.05025e-92	0.244956	0.27	0.09	1.30812e-87	Nip	LOC_Os01g62070
8.42766e-92	0.254884	0.335	0.139	2.18293e-87	Nip	LOC_Os04g59494
9.22506e-92	0.280868	0.338	0.145	2.38947e-87	Nip	LOC_Os02g33580
1.02851e-91	0.307648	0.68	0.521	2.66403e-87	Nip	LOC_Os06g06030
3.02506e-91	0.291576	0.474	0.262	7.83552e-87	Nip	LOC_Os04g52730
3.70658e-91	0.227398	0.256	0.08	9.60078e-87	Nip	LOC_Os08g08190
5.59174e-91	0.326088	0.567	0.352	1.44837e-86	Nip	LOC_Os04g57770
7.84997e-91	0.418144	0.518	0.318	2.0333e-86	Nip	LOC_Os04g45970
8.15919e-91	0.264028	0.892	0.804	2.11339e-86	Nip	LOC_Os01g70980
9.67058e-91	0.351571	0.638	0.474	2.50487e-86	Nip	LOC_Os08g40510
1.56838e-90	0.244816	0.376	0.176	4.06243e-86	Nip	LOC_Os04g56290
1.70805e-90	0.264355	0.23	0.066	4.4242e-86	Nip	LOC_Os03g48820
4.63574e-90	0.210722	0.153	0.018	1.20075e-85	Nip	LOC_Os10g25870
1.06334e-89	0.335455	0.315	0.126	2.75428e-85	Nip	LOC_Os04g47970
1.39364e-89	0.496463	0.688	0.513	3.60981e-85	Nip	LOC_Os04g39980
1.40992e-89	0.334783	0.119	0.002	3.65197e-85	Nip	LOC_Os06g51050
1.43532e-89	0.289197	0.902	0.786	3.71777e-85	Nip	LOC_Os01g47730
1.54092e-89	0.255986	0.312	0.126	3.9913e-85	Nip	LOC_Os09g28220
2.02383e-89	0.245578	0.242	0.073	5.24212e-85	Nip	LOC_Os12g24170
4.5578e-89	0.310548	0.539	0.333	1.18056e-84	Nip	LOC_Os06g19730
3.81147e-88	0.250767	0.279	0.102	9.87248e-84	Nip	LOC_Os01g56330
1.63796e-87	0.366622	0.34	0.157	4.24265e-83	Nip	LOC_Os01g58335
1.71814e-87	0.20302	0.258	0.082	4.45032e-83	Nip	LOC_Os03g21890
2.12739e-87	0.296751	0.96	0.924	5.51037e-83	Nip	LOC_Os02g11070
2.2375e-87	0.374759	0.673	0.541	5.79558e-83	Nip	LOC_Os07g14150
2.32583e-87	0.269312	0.838	0.677	6.02437e-83	Nip	LOC_Os08g03290
2.40683e-87	0.523696	0.179	0.034	6.23418e-83	Nip	LOC_Os05g40010
2.93086e-87	0.373341	0.687	0.502	7.59152e-83	Nip	LOC_Os01g58420
3.7738e-87	0.305304	0.437	0.237	9.77491e-83	Nip	LOC_Os04g42134
7.10084e-87	0.299248	0.611	0.406	1.83926e-82	Nip	LOC_Os02g10700
1.57505e-86	0.418005	0.65	0.45	4.0797e-82	Nip	LOC_Os08g43490
1.59177e-86	0.224055	0.145	0.016	4.12301e-82	Nip	LOC_Os02g53250
3.39513e-86	0.315092	0.987	0.979	8.79407e-82	Nip	LOC_Os04g52090
4.81045e-86	0.321553	0.358	0.161	1.246e-81	Nip	LOC_Os01g60020
5.4719e-86	0.361322	0.415	0.224	1.41733e-81	Nip	LOC_Os01g62410
1.12835e-85	0.663759	0.906	0.857	2.92264e-81	Nip	LOC_Os08g04350
1.25878e-85	0.316849	0.978	0.977	3.2605e-81	Nip	LOC_Os04g57760
1.47328e-85	0.360223	0.435	0.241	3.81609e-81	Nip	LOC_Os09g36320
1.81266e-85	0.356872	0.705	0.555	4.69514e-81	Nip	LOC_Os03g21000
2.29211e-85	0.43782	0.637	0.445	5.93703e-81	Nip	LOC_Os07g09970
4.59973e-85	0.291324	0.156	0.023	1.19142e-80	Nip	LOC_Os04g33600
4.9838e-85	0.312315	0.352	0.164	1.2909e-80	Nip	LOC_Os06g48060
5.7163e-85	0.204837	0.233	0.07	1.48064e-80	Nip	LOC_Os06g06330
7.5198e-85	0.345304	0.627	0.445	1.94778e-80	Nip	LOC_Os05g45300
8.7105e-85	0.214408	0.176	0.034	2.25619e-80	Nip	LOC_Os10g25674
1.24995e-84	0.207936	0.108	0	3.23761e-80	Nip	LOC_Os11g44580
1.32073e-84	0.595875	0.819	0.725	3.42095e-80	Nip	LOC_Os01g49160
1.41872e-84	0.288166	0.496	0.299	3.67477e-80	Nip	LOC_Os05g38520
1.62111e-84	0.238576	0.39	0.193	4.199e-80	Nip	LOC_Os02g36740
1.7398e-84	0.216434	0.303	0.122	4.50643e-80	Nip	LOC_Os01g37980
2.95778e-84	0.397181	0.87	0.87	7.66123e-80	Nip	LOC_Os02g33680
5.58746e-84	0.287973	0.494	0.293	1.44727e-79	Nip	LOC_Os01g43480
8.06796e-84	0.240303	0.205	0.052	2.08976e-79	Nip	LOC_Os08g43190
9.50995e-84	0.255594	0.445	0.248	2.46327e-79	Nip	LOC_Os03g27450
3.24452e-83	0.341469	0.183	0.04	8.40395e-79	Nip	LOC_Os01g50350
3.28524e-83	0.265181	0.51	0.312	8.50944e-79	Nip	LOC_Os07g35810
3.5061e-83	0.449759	0.344	0.162	9.08149e-79	Nip	LOC_Os05g48210
3.5181e-83	0.415766	0.598	0.423	9.11259e-79	Nip	LOC_Os05g46500
3.89781e-83	0.200539	0.164	0.029	1.00961e-78	Nip	LOC_Os06g19990
1.48762e-82	0.233353	0.281	0.105	3.85323e-78	Nip	LOC_Os10g23100
2.08612e-82	0.266702	0.31	0.134	5.40346e-78	Nip	LOC_Os03g58020
2.21768e-82	0.449701	0.484	0.307	5.74423e-78	Nip	LOC_Os03g06390
2.72537e-82	0.227506	0.306	0.126	7.05926e-78	Nip	LOC_Os12g18860
7.14375e-82	0.245312	0.209	0.058	1.85037e-77	Nip	LOC_Os06g11600
1.17994e-81	0.219189	0.287	0.113	3.05629e-77	Nip	LOC_Os09g38920
1.36404e-81	0.347609	0.707	0.546	3.53313e-77	Nip	LOC_Os01g54600
2.29285e-81	0.433347	0.593	0.425	5.93894e-77	Nip	LOC_Os04g37480
2.65971e-81	0.335223	0.55	0.378	6.88918e-77	Nip	LOC_Os05g32630
3.43078e-81	0.303195	0.336	0.145	8.88641e-77	Nip	LOC_Os02g32840
4.82403e-81	0.25291	0.283	0.112	1.24952e-76	Nip	LOC_Os06g08400
9.19077e-81	0.386575	0.942	0.903	2.38059e-76	Nip	LOC_Os04g57810
1.23066e-80	0.348721	0.529	0.337	3.18766e-76	Nip	LOC_Os03g05620
3.49193e-80	0.236796	0.32	0.141	9.04479e-76	Nip	LOC_Os08g10450
5.51714e-80	0.225517	0.142	0.019	1.42905e-75	Nip	LOC_Os02g52210
6.16787e-80	0.253018	0.117	0.007	1.5976e-75	Nip	LOC_Os03g46070
7.17423e-80	0.232197	0.308	0.13	1.85827e-75	Nip	LOC_Os03g17120
8.21035e-80	0.3554	0.47	0.285	2.12664e-75	Nip	LOC_Os01g43870
1.14091e-79	0.212757	0.137	0.016	2.95518e-75	Nip	LOC_Os10g34910
1.25664e-79	0.23061	0.322	0.142	3.25495e-75	Nip	LOC_Os03g58050
4.39709e-79	0.302871	0.179	0.041	1.13893e-74	Nip	LOC_Os02g49720
4.75238e-79	0.266099	0.549	0.354	1.23096e-74	Nip	LOC_Os07g41330
5.30948e-79	0.228393	0.381	0.191	1.37526e-74	Nip	LOC_Os07g43890
6.31546e-79	0.511608	0.183	0.044	1.63583e-74	Nip	LOC_Os10g18870
9.90023e-79	0.32396	0.943	0.901	2.56436e-74	Nip	LOC_Os04g58280
1.00082e-78	0.541082	0.134	0.016	2.59231e-74	Nip	LOC_Os08g17500
1.01155e-78	0.357573	0.519	0.341	2.62012e-74	Nip	LOC_Os11g47710
1.67464e-78	0.241568	0.397	0.206	4.33766e-74	Nip	LOC_Os09g07764
1.82539e-78	0.389755	0.638	0.465	4.72814e-74	Nip	LOC_Os02g32520
4.53049e-78	0.286823	0.461	0.278	1.17349e-73	Nip	LOC_Os04g56646
4.71441e-78	0.218355	0.197	0.053	1.22113e-73	Nip	LOC_Os02g30410
7.74627e-78	0.304925	0.612	0.45	2.00644e-73	Nip	LOC_Os02g14770
1.57432e-77	0.223143	0.323	0.144	4.07781e-73	Nip	LOC_Os08g08650
2.18562e-77	0.269678	0.357	0.164	5.66119e-73	Nip	LOC_Os07g31500
2.28522e-77	0.265605	0.723	0.571	5.91919e-73	Nip	LOC_Os06g15360
3.82709e-77	0.304784	0.704	0.546	9.91293e-73	Nip	LOC_Os01g48444
4.73087e-77	0.302865	0.424	0.245	1.22539e-72	Nip	LOC_Os03g07880
1.88671e-76	0.366203	0.341	0.167	4.88694e-72	Nip	LOC_Os03g16350
4.85082e-76	0.201542	0.149	0.025	1.25646e-71	Nip	LOC_Os04g15690
8.20761e-76	0.781391	0.128	0.014	2.12593e-71	Nip	LOC_Os05g12640
9.58616e-76	0.314282	0.564	0.359	2.48301e-71	Nip	LOC_Os06g25010
1.1925e-75	0.336204	0.34	0.166	3.08882e-71	Nip	LOC_Os05g06940
5.588e-75	0.379572	0.816	0.749	1.4474e-70	Nip	LOC_Os03g51390
5.75194e-75	0.341491	0.661	0.466	1.48987e-70	Nip	LOC_Os12g29330
6.91934e-75	0.227183	0.272	0.108	1.79225e-70	Nip	LOC_Os03g45170
9.25352e-75	0.271071	0.489	0.303	2.39685e-70	Nip	LOC_Os06g35540
1.65529e-74	0.26356	0.481	0.293	4.28753e-70	Nip	LOC_Os03g48710
2.94973e-74	0.438987	0.676	0.538	7.6404e-70	Nip	LOC_Os04g57440
3.80659e-74	0.267461	0.763	0.633	9.85982e-70	Nip	LOC_Os01g66150
7.56612e-74	0.365221	0.658	0.514	1.95978e-69	Nip	LOC_Os03g58890
1.31219e-73	0.379038	0.687	0.517	3.39884e-69	Nip	LOC_Os05g09440
2.01648e-73	0.288262	0.229	0.078	5.22307e-69	Nip	LOC_Os08g31950
2.21066e-73	0.505518	0.27	0.111	5.72604e-69	Nip	LOC_Os07g26550
2.35503e-73	0.300656	0.868	0.784	6.09999e-69	Nip	LOC_Os07g07990
4.71808e-73	0.325417	0.825	0.732	1.22208e-68	Nip	LOC_Os11g33050
6.26559e-73	0.290273	0.451	0.259	1.62291e-68	Nip	LOC_Os04g40040
7.94555e-73	0.274768	0.974	0.909	2.05806e-68	Nip	LOC_Os07g47670
1.23642e-72	0.372531	0.661	0.501	3.20256e-68	Nip	LOC_Os09g07800
1.79549e-72	0.416211	0.477	0.316	4.65067e-68	Nip	LOC_Os09g29310
1.97588e-72	0.273635	0.435	0.247	5.11792e-68	Nip	LOC_Os03g24600
2.36605e-72	0.2949	0.697	0.54	6.12854e-68	Nip	LOC_Os02g52780
7.31431e-72	0.288111	0.86	0.729	1.89455e-67	Nip	LOC_Os05g46620
8.49851e-72	0.259588	0.825	0.647	2.20128e-67	Nip	LOC_Os02g36940
1.2983e-71	0.334899	0.276	0.117	3.36286e-67	Nip	LOC_Os05g04680
1.67149e-71	0.259845	0.568	0.385	4.3295e-67	Nip	LOC_Os05g51500
1.80626e-71	0.372832	0.094	0.001	4.67858e-67	Nip	LOC_Os10g21670
2.2744e-71	0.392104	0.363	0.198	5.89114e-67	Nip	LOC_Os01g72520
2.28231e-71	0.267837	0.339	0.155	5.91163e-67	Nip	LOC_Os02g33820
3.80948e-71	0.350216	0.489	0.317	9.86732e-67	Nip	LOC_Os09g07460
[truncated: 385 more rows]
