# Supplementary material for: Cell Type-Specific Differentiation Between Indica and Japonica Rice Root Tip Responses to Different Environments Based on Single-Cell RNA Sequencing
Source: Front Genet. 2021 May 17;12:659500. doi: 10.3389/fgene.2021.659500 (PMC8166412; doi:10.3389/fgene.2021.659500)
Supplement: Supplementary file 14 [file Table_7.XLS]

## Sheet: Epidermis_near_root_hair
Supplementary table 7. Differential expression genes between indica and japonica rice varieties in epidermis near root hair
p_val	avg_logFC	pct.1	pct.2	p_val_adj	cluster	gene
2.22817e-53	2.78031	1	0	5.7714e-49	9311	LOC_Os01g54734
2.22823e-53	4.56937	1	0	5.77157e-49	9311	LOC_Os10g28170
6.99957e-53	2.82208	0.994	0	1.81303e-48	9311	LOC_Os04g42064
6.99997e-53	2.97774	0.994	0	1.81313e-48	9311	LOC_Os06g47239
6.99997e-53	2.34164	0.994	0	1.81313e-48	9311	LOC_Os08g41210
2.07983e-51	2.9662	0.977	0	5.38719e-47	9311	LOC_Os01g68950
1.73542e-49	2.27181	0.953	0	4.49508e-45	9311	LOC_Os04g37769
1.521e-48	1.94556	0.942	0	3.93969e-44	9311	LOC_Os01g58048
1.6177e-48	2.09585	0.994	0.693	4.19017e-44	9311	LOC_Os02g35610
4.45732e-48	2.2949	0.936	0	1.15454e-43	9311	LOC_Os01g40189
1.05009e-47	1.46732	1	0.953	2.71994e-43	9311	LOC_Os07g39680
1.2974e-47	1.8759	0.93	0	3.36051e-43	9311	LOC_Os04g37778
1.2974e-47	1.85306	0.93	0	3.36051e-43	9311	LOC_Os11g06340
2.55243e-47	2.01033	1	0.787	6.6113e-43	9311	LOC_Os06g13190
3.75093e-47	1.90376	0.924	0	9.71567e-43	9311	LOC_Os02g12521
3.75103e-47	2.17317	0.924	0	9.71592e-43	9311	LOC_Os01g09214
1.07727e-46	2.42452	0.919	0	2.79034e-42	9311	LOC_Os03g47059
3.65774e-46	1.57975	1	0.89	9.47428e-42	9311	LOC_Os05g05940
2.99401e-45	2.30132	0.942	0.126	7.75507e-41	9311	LOC_Os10g02380
6.85918e-45	1.85513	0.895	0	1.77666e-40	9311	LOC_Os09g17574
2.20932e-43	1.5697	0.971	0.331	5.72259e-39	9311	LOC_Os01g52214
7.01814e-43	1.98587	0.965	0.37	1.81784e-38	9311	LOC_Os02g36530
1.04349e-42	1.54177	0.924	0.157	2.70286e-38	9311	LOC_Os02g10070
1.0659e-42	2.30282	0.866	0	2.7609e-38	9311	LOC_Os02g52150
3.54982e-42	1.78497	0.965	0.528	9.19474e-38	9311	LOC_Os07g12200
1.12087e-41	1.9036	0.901	0.087	2.90328e-37	9311	LOC_Os06g05410
1.34546e-41	1.72124	0.959	0.378	3.48502e-37	9311	LOC_Os03g60080
1.83824e-41	0.748092	1	1	4.7614e-37	9311	LOC_Os03g40920
1.50861e-40	1.63403	0.93	0.331	3.9076e-36	9311	LOC_Os06g08564
1.96618e-40	1.15319	1	0.961	5.09281e-36	9311	LOC_Os02g06640
3.58041e-40	1.621	0.983	0.717	9.27398e-36	9311	LOC_Os11g11970
3.68859e-40	1.74637	0.831	0	9.55418e-36	9311	LOC_Os08g32170
2.46492e-39	1.61454	0.82	0	6.38464e-35	9311	LOC_Os01g39923
1.60772e-38	1.60562	0.808	0	4.16433e-34	9311	LOC_Os07g42390
1.6078e-38	1.60777	0.808	0	4.16451e-34	9311	LOC_Os01g41124
4.0694e-38	1.29635	0.802	0	1.05406e-33	9311	EVM035660
6.71647e-38	2.0237	0.953	0.598	1.7397e-33	9311	LOC_Os01g05064
1.44176e-37	1.52936	0.866	0.142	3.73445e-33	9311	LOC_Os02g48210
1.94282e-37	1.33589	0.82	0.039	5.0323e-33	9311	LOC_Os01g64630
1.57428e-36	1.42093	0.779	0	4.07769e-32	9311	LOC_Os01g34974
2.3066e-36	1.57659	0.808	0.047	5.97454e-32	9311	LOC_Os10g04020
3.8693e-36	1.35741	0.773	0	1.00223e-31	9311	LOC_Os07g31300
2.36954e-35	1.48622	0.953	0.535	6.13759e-31	9311	LOC_Os07g37400
2.59994e-35	1.28295	0.901	0.331	6.73437e-31	9311	LOC_Os02g08180
1.03931e-34	1.46801	0.913	0.37	2.69202e-30	9311	LOC_Os01g42380
5.2704e-34	1.40763	0.872	0.268	1.36514e-29	9311	LOC_Os01g28790
6.85312e-34	1.54988	0.959	0.685	1.7751e-29	9311	LOC_Os07g44180
7.56329e-34	1.50789	0.738	0	1.95904e-29	9311	LOC_Os01g43729
1.11608e-33	1.25886	0.872	0.26	2.89086e-29	9311	LOC_Os01g46610
1.78653e-33	1.86482	0.733	0	4.62748e-29	9311	LOC_Os11g10510
2.21292e-33	1.26385	0.971	0.551	5.73191e-29	9311	LOC_Os06g15990
4.19652e-33	1.21354	0.727	0	1.08698e-28	9311	LOC_Os08g13294
2.27774e-32	1.11248	0.715	0	5.89979e-28	9311	LOC_Os10g26834
2.27778e-32	1.67246	0.715	0	5.89991e-28	9311	LOC_Os02g08330
2.27778e-32	1.49846	0.715	0	5.89991e-28	9311	LOC_Os11g46860
3.89031e-32	1.27835	0.866	0.299	1.00767e-27	9311	LOC_Os04g58110
5.26343e-32	1.16478	0.709	0	1.36333e-27	9311	LOC_Os06g33904
9.62291e-32	1.26147	0.855	0.283	2.49253e-27	9311	LOC_Os06g21550
1.11764e-31	1.20595	0.866	0.331	2.8949e-27	9311	LOC_Os11g02200
1.15512e-31	1.30276	0.733	0.039	2.992e-27	9311	LOC_Os03g29350
6.28789e-31	1.31553	0.692	0	1.62869e-26	9311	LOC_Os05g40779
6.28789e-31	1.16375	0.692	0	1.62869e-26	9311	LOC_Os08g10504
6.28801e-31	1.37543	0.692	0	1.62872e-26	9311	LOC_Os10g34801
1.11364e-30	1.17506	0.866	0.409	2.88456e-26	9311	LOC_Os09g39550
3.19985e-30	2.17202	0.68	0	8.28825e-26	9311	LOC_Os02g48710
1.16282e-29	1.33844	0.698	0.024	3.01194e-25	9311	LOC_Os02g53040
1.59456e-29	1.36786	0.669	0	4.13024e-25	9311	LOC_Os05g02310
1.59456e-29	1.22361	0.669	0	4.13024e-25	9311	LOC_Os07g23696
1.21737e-28	1.30486	0.68	0.031	3.15324e-24	9311	LOC_Os05g08370
1.7064e-28	1.18949	0.651	0	4.41991e-24	9311	LOC_Os03g58464
2.02579e-28	1.22015	0.831	0.26	5.24721e-24	9311	LOC_Os03g08999
3.12874e-28	1.34868	0.744	0.102	8.10405e-24	9311	LOC_Os01g70470
5.32839e-28	1.11863	0.669	0.031	1.38016e-23	9311	LOC_Os01g05810
8.4525e-28	1.27487	0.703	0.063	2.18937e-23	9311	LOC_Os01g07760
1.30274e-27	1.05516	0.657	0.016	3.37435e-23	9311	LOC_Os02g51500
1.57389e-27	1.03516	0.645	0.008	4.0767e-23	9311	LOC_Os06g43210
1.74455e-27	1.11359	0.634	0	4.51872e-23	9311	LOC_Os11g10045
2.00346e-27	1.39556	0.826	0.386	5.18936e-23	9311	LOC_Os06g04889
2.72926e-27	1.11103	0.82	0.299	7.06933e-23	9311	LOC_Os03g60090
3.02178e-27	1.20715	0.89	0.52	7.82702e-23	9311	LOC_Os08g44340
3.74858e-27	1.47255	0.628	0	9.70958e-23	9311	LOC_Os04g38010
5.03392e-27	1.39131	0.645	0.024	1.30389e-22	9311	LOC_Os01g22010
1.7053e-26	1.20428	0.616	0	4.41706e-22	9311	LOC_Os05g10656
2.38056e-26	1.68582	0.837	0.299	6.16613e-22	9311	LOC_Os12g26960
3.17972e-26	0.952304	0.965	0.787	8.23611e-22	9311	LOC_Os04g30420
3.35777e-26	1.07976	0.988	0.898	8.6973e-22	9311	LOC_Os06g21410
3.49876e-26	0.839323	0.994	0.929	9.06249e-22	9311	LOC_Os04g42090
3.61057e-26	1.56512	0.61	0	9.35209e-22	9311	LOC_Os12g36229
3.61057e-26	1.17525	0.61	0	9.35209e-22	9311	EVM019481
7.60736e-26	1.01724	0.605	0	1.97046e-21	9311	LOC_Os01g05949
7.60749e-26	1.24904	0.605	0	1.97049e-21	9311	LOC_Os01g24280
7.60749e-26	1.09278	0.605	0	1.97049e-21	9311	LOC_Os01g04619
8.93595e-26	1.10396	0.715	0.126	2.31459e-21	9311	LOC_Os12g06870
1.32406e-25	1.43096	0.715	0.142	3.42958e-21	9311	LOC_Os01g04330
1.59519e-25	0.941829	0.599	0	4.13185e-21	9311	LOC_Os01g24255
2.6797e-25	1.21048	0.89	0.346	6.94096e-21	9311	LOC_Os05g45070
2.90231e-25	1.08107	0.75	0.197	7.51756e-21	9311	LOC_Os09g13920
3.32889e-25	1.15707	0.593	0	8.6225e-21	9311	LOC_Os09g30412
3.32889e-25	0.904884	0.593	0	8.6225e-21	9311	LOC_Os05g49270
4.3578e-25	0.898064	0.965	0.787	1.12876e-20	9311	LOC_Os01g46926
9.81718e-25	0.89613	0.93	0.74	2.54285e-20	9311	LOC_Os01g37800
1.42917e-24	1.25754	0.581	0	3.70183e-20	9311	LOC_Os05g12481
1.62735e-24	1.15256	0.773	0.22	4.21517e-20	9311	LOC_Os05g02770
2.54829e-24	0.856473	0.965	0.89	6.60059e-20	9311	LOC_Os04g37710
2.9404e-24	1.08736	0.576	0	7.61622e-20	9311	LOC_Os08g14108
3.41627e-24	0.946832	0.698	0.11	8.84883e-20	9311	LOC_Os07g45260
3.9452e-24	0.937649	0.599	0.024	1.02189e-19	9311	LOC_Os02g46260
4.73065e-24	0.836343	0.953	0.89	1.22533e-19	9311	LOC_Os05g29000
5.75535e-24	1.06576	0.756	0.228	1.49075e-19	9311	LOC_Os05g14180
5.83864e-24	1.7203	0.93	0.661	1.51232e-19	9311	LOC_Os11g41150
6.02144e-24	0.891135	0.57	0	1.55967e-19	9311	LOC_Os12g34389
6.2755e-24	1.03294	0.587	0.016	1.62548e-19	9311	LOC_Os03g08050
6.54229e-24	1.05742	0.657	0.094	1.69458e-19	9311	LOC_Os05g44170
8.68235e-24	0.968033	0.971	0.85	2.2489e-19	9311	LOC_Os03g29240
1.22738e-23	0.942333	0.564	0	3.17916e-19	9311	LOC_Os04g32043
1.25047e-23	1.28133	0.849	0.37	3.23898e-19	9311	LOC_Os06g05510
1.47693e-23	1.08004	0.75	0.244	3.82554e-19	9311	LOC_Os08g02420
2.52554e-23	0.924281	0.971	0.898	6.54166e-19	9311	LOC_Os04g58890
2.92825e-23	1.16898	0.68	0.094	7.58476e-19	9311	LOC_Os02g41580
4.01939e-23	1.08747	0.674	0.126	1.0411e-18	9311	LOC_Os01g65900
4.41488e-23	1.14434	0.698	0.157	1.14354e-18	9311	LOC_Os04g40630
6.88904e-23	1.21736	0.703	0.173	1.7844e-18	9311	LOC_Os03g49600
1.01123e-22	0.924443	0.547	0	2.61928e-18	9311	LOC_Os11g23824
1.19969e-22	0.797748	0.959	0.787	3.10743e-18	9311	LOC_Os07g30970
1.69209e-22	1.20864	0.82	0.441	4.38285e-18	9311	LOC_Os06g46950
2.02398e-22	0.845144	0.541	0	5.2425e-18	9311	LOC_Os01g01704
4.30773e-22	0.958704	0.61	0.079	1.11579e-17	9311	LOC_Os07g07240
8.74841e-22	1.10553	0.733	0.252	2.26601e-17	9311	LOC_Os07g42220
9.33574e-22	0.89706	0.541	0.008	2.41814e-17	9311	LOC_Os09g36100
1.64094e-21	0.956489	0.692	0.15	4.25037e-17	9311	LOC_Os05g34830
1.73089e-21	1.01127	0.849	0.52	4.48335e-17	9311	LOC_Os08g37370
2.69282e-21	1.38288	0.657	0.118	6.97494e-17	9311	LOC_Os07g28480
3.10627e-21	0.807648	0.517	0	8.04585e-17	9311	LOC_Os02g10374
3.34493e-21	1.33405	0.86	0.394	8.66403e-17	9311	LOC_Os04g52504
3.60743e-21	1.07611	0.587	0.055	9.34397e-17	9311	LOC_Os08g42590
6.08094e-21	0.805056	0.512	0	1.57508e-16	9311	LOC_Os09g14580
1.18527e-20	1.2707	0.506	0	3.07009e-16	9311	LOC_Os04g46820
1.18527e-20	1.17308	0.506	0	3.07009e-16	9311	LOC_Os03g35873
1.20608e-20	0.985164	0.762	0.323	3.12398e-16	9311	LOC_Os09g39440
1.2319e-20	1.43098	0.878	0.551	3.19087e-16	9311	LOC_Os03g16020
1.25127e-20	0.985201	0.924	0.661	3.24104e-16	9311	LOC_Os03g56860
1.25753e-20	1.03196	0.924	0.724	3.25725e-16	9311	LOC_Os11g41875
1.81589e-20	1.0003	0.994	0.898	4.70353e-16	9311	LOC_Os01g32670
1.90521e-20	0.907174	0.651	0.142	4.93488e-16	9311	LOC_Os07g38970
2.65626e-20	0.864284	0.547	0.031	6.88024e-16	9311	LOC_Os12g07990
3.94146e-20	0.851809	0.884	0.504	1.02092e-15	9311	LOC_Os08g37444
4.44536e-20	1.04666	0.494	0	1.15144e-15	9311	LOC_Os10g38189
4.73131e-20	1.29137	0.64	0.134	1.2255e-15	9311	LOC_Os05g32860
4.87628e-20	1.1277	0.587	0.087	1.26305e-15	9311	LOC_Os08g44370
5.42369e-20	0.722911	0.988	0.945	1.40484e-15	9311	LOC_Os11g43900
5.4472e-20	0.853114	0.599	0.079	1.41093e-15	9311	LOC_Os02g56560
5.63462e-20	0.957659	0.674	0.165	1.45948e-15	9311	LOC_Os08g31280
8.55411e-20	0.759049	0.488	0	2.21569e-15	9311	LOC_Os01g57119
8.62807e-20	0.934845	0.901	0.606	2.23484e-15	9311	LOC_Os04g32920
1.48035e-19	0.884103	0.581	0.079	3.83441e-15	9311	LOC_Os09g34020
1.63582e-19	0.883727	0.599	0.11	4.2371e-15	9311	LOC_Os02g50174
1.78818e-19	1.22342	0.744	0.291	4.63175e-15	9311	LOC_Os03g55980
2.4702e-19	1.3724	0.616	0.134	6.3983e-15	9311	LOC_Os03g28330
2.7199e-19	0.856396	0.669	0.197	7.04508e-15	9311	LOC_Os03g61330
3.48211e-19	0.860761	0.75	0.252	9.01936e-15	9311	LOC_Os03g20949
3.4906e-19	1.0667	0.831	0.441	9.04135e-15	9311	LOC_Os03g52410
4.11327e-19	0.904912	0.866	0.504	1.06542e-14	9311	LOC_Os02g38050
5.94328e-19	1.03341	0.471	0	1.53943e-14	9311	LOC_Os11g16296
7.15308e-19	0.76151	0.68	0.197	1.85279e-14	9311	LOC_Os08g45220
7.64652e-19	0.799712	0.983	0.819	1.9806e-14	9311	LOC_Os06g11130
8.40741e-19	0.851094	0.977	0.921	2.17769e-14	9311	LOC_Os03g51600
1.07418e-18	0.902131	0.529	0.047	2.78233e-14	9311	LOC_Os02g32469
1.97291e-18	0.844024	0.756	0.378	5.11024e-14	9311	LOC_Os04g45910
2.02443e-18	0.405964	1	1	5.24368e-14	9311	LOC_Os05g34770
2.11958e-18	0.756816	0.459	0	5.49015e-14	9311	LOC_Os12g15884
2.11962e-18	1.28926	0.459	0	5.49023e-14	9311	LOC_Os06g38710
5.42659e-18	0.745072	0.552	0.079	1.4056e-13	9311	LOC_Os02g25060
7.43708e-18	0.918359	0.448	0	1.92635e-13	9311	LOC_Os04g49249
7.43708e-18	0.866405	0.448	0	1.92635e-13	9311	LOC_Os10g38562
8.25405e-18	0.699237	0.855	0.614	2.13796e-13	9311	LOC_Os05g27930
9.00026e-18	0.851846	0.663	0.205	2.33125e-13	9311	LOC_Os07g42890
1.38468e-17	1.30293	0.442	0	3.5866e-13	9311	LOC_Os01g18910
1.38468e-17	0.805474	0.442	0	3.5866e-13	9311	LOC_Os04g57970
1.38468e-17	0.727747	0.442	0	3.5866e-13	9311	LOC_Os06g39902
1.49022e-17	0.304826	1	1	3.85996e-13	9311	LOC_Os07g45320
1.58121e-17	0.900145	0.645	0.189	4.09564e-13	9311	LOC_Os02g50340
1.88137e-17	0.829342	0.93	0.685	4.87313e-13	9311	LOC_Os09g21210
1.9246e-17	0.771823	0.547	0.079	4.9851e-13	9311	LOC_Os02g47580
2.56781e-17	0.925616	0.436	0	6.65113e-13	9311	LOC_Os03g50969
2.73152e-17	0.86941	0.616	0.181	7.07518e-13	9311	LOC_Os07g48780
3.1182e-17	0.857493	0.797	0.441	8.07675e-13	9311	LOC_Os01g57570
3.31281e-17	1.01835	0.517	0.063	8.58084e-13	9311	LOC_Os01g55320
3.56767e-17	1.09002	0.779	0.378	9.24099e-13	9311	LOC_Os09g31410
4.26304e-17	0.706792	0.791	0.441	1.10421e-12	9311	LOC_Os08g15170
4.36207e-17	0.370532	1	1	1.12986e-12	9311	LOC_Os03g30430
6.15876e-17	0.741697	0.465	0.024	1.59524e-12	9311	LOC_Os04g42480
6.35211e-17	0.689619	0.517	0.063	1.64532e-12	9311	LOC_Os12g29340
8.13867e-17	0.669191	0.564	0.087	2.10808e-12	9311	LOC_Os08g44820
8.53014e-17	0.8132	0.459	0.024	2.20948e-12	9311	LOC_Os02g48190
8.72627e-17	0.735079	0.424	0	2.26028e-12	9311	EVM019851
8.72639e-17	0.726139	0.424	0	2.26031e-12	9311	LOC_Os05g08356
1.21079e-16	0.825718	0.605	0.157	3.13618e-12	9311	LOC_Os06g35410
1.59926e-16	0.822679	0.419	0	4.1424e-12	9311	LOC_Os01g33204
1.70927e-16	0.853792	0.674	0.26	4.42735e-12	9311	LOC_Os01g06590
1.72883e-16	0.717465	0.61	0.165	4.47802e-12	9311	LOC_Os09g38750
4.61437e-16	0.740002	0.535	0.087	1.19521e-11	9311	LOC_Os10g24800
4.8804e-16	0.755104	0.471	0.039	1.26412e-11	9311	LOC_Os03g37090
5.20864e-16	0.656355	0.43	0.016	1.34914e-11	9311	LOC_Os01g66350
6.01275e-16	0.607202	0.965	0.835	1.55742e-11	9311	LOC_Os06g11135
6.83772e-16	0.791899	0.767	0.441	1.77111e-11	9311	LOC_Os10g35630
9.61857e-16	1.16947	0.401	0	2.4914e-11	9311	LOC_Os07g49116
9.61857e-16	0.702824	0.401	0	2.4914e-11	9311	LOC_Os12g01030
9.61857e-16	0.603088	0.401	0	2.4914e-11	9311	LOC_Os10g29559
1.10735e-15	0.629535	0.942	0.819	2.86825e-11	9311	LOC_Os02g52314
1.73592e-15	0.887851	0.395	0	4.49637e-11	9311	LOC_Os02g53320
1.73592e-15	0.648403	0.395	0	4.49637e-11	9311	LOC_Os05g16744
1.73592e-15	0.612802	0.395	0	4.49637e-11	9311	LOC_Os01g56300
2.31654e-15	0.679194	0.419	0.016	6.00031e-11	9311	LOC_Os02g42585
2.92637e-15	0.616825	0.43	0.024	7.57988e-11	9311	LOC_Os01g73000
3.12112e-15	0.655293	0.39	0	8.08433e-11	9311	LOC_Os01g03136
5.59066e-15	0.650564	0.384	0	1.44809e-10	9311	LOC_Os04g37890
5.59073e-15	0.822537	0.384	0	1.44811e-10	9311	LOC_Os08g05964
5.59073e-15	0.685605	0.384	0	1.44811e-10	9311	LOC_Os03g59430
6.40038e-15	0.793077	0.919	0.717	1.65783e-10	9311	LOC_Os01g47690
8.11354e-15	0.757646	0.535	0.126	2.10157e-10	9311	LOC_Os03g08020
9.97735e-15	0.820776	0.378	0	2.58433e-10	9311	LOC_Os07g23850
1.04834e-14	0.724443	0.465	0.055	2.71541e-10	9311	LOC_Os12g32190
1.23629e-14	0.707062	0.808	0.52	3.20225e-10	9311	LOC_Os10g42190
1.31229e-14	0.758146	0.547	0.134	3.3991e-10	9311	LOC_Os03g25610
1.32837e-14	0.771359	0.529	0.126	3.44074e-10	9311	LOC_Os03g57900
1.34459e-14	0.700471	0.564	0.15	3.48276e-10	9311	LOC_Os09g29300
1.59465e-14	0.738166	0.884	0.709	4.13046e-10	9311	LOC_Os02g50350
1.82226e-14	0.677897	0.384	0.008	4.72003e-10	9311	LOC_Os03g22270
1.87331e-14	0.719844	0.622	0.213	4.85225e-10	9311	LOC_Os04g42600
1.93232e-14	0.895284	0.645	0.244	5.00509e-10	9311	LOC_Os05g02760
1.95861e-14	0.679742	0.384	0.008	5.07318e-10	9311	LOC_Os10g40390
2.20232e-14	0.793545	0.692	0.323	5.70445e-10	9311	LOC_Os12g06780
3.21265e-14	0.683965	0.453	0.063	8.32142e-10	9311	LOC_Os01g51280
3.22076e-14	1.09845	0.378	0.008	8.34242e-10	9311	LOC_Os08g08970
3.43488e-14	0.806226	0.488	0.094	8.89702e-10	9311	LOC_Os03g53650
3.95112e-14	1.13192	0.849	0.638	1.02342e-09	9311	LOC_Os12g04204
4.20083e-14	0.78915	0.483	0.071	1.0881e-09	9311	LOC_Os07g39210
4.84091e-14	0.720431	0.773	0.465	1.25389e-09	9311	LOC_Os02g54780
4.86388e-14	0.590094	0.895	0.78	1.25984e-09	9311	LOC_Os09g20660
5.0043e-14	0.73469	0.831	0.535	1.29621e-09	9311	LOC_Os06g41770
5.54762e-14	0.575392	0.36	0	1.43695e-09	9311	LOC_Os04g50216
5.82573e-14	0.675247	0.419	0.039	1.50898e-09	9311	LOC_Os04g33080
5.98983e-14	0.788794	0.57	0.197	1.55149e-09	9311	LOC_Os04g49510
7.38103e-14	0.699895	0.738	0.37	1.91183e-09	9311	LOC_Os01g43370
7.73453e-14	0.634145	0.401	0.024	2.0034e-09	9311	LOC_Os11g41140
8.0645e-14	1.02586	0.459	0.063	2.08887e-09	9311	LOC_Os11g37950
8.45741e-14	0.755394	0.616	0.244	2.19064e-09	9311	LOC_Os05g24550
9.75729e-14	0.680321	0.355	0	2.52733e-09	9311	LOC_Os11g42480
9.75729e-14	0.506033	0.355	0	2.52733e-09	9311	LOC_Os02g34729
1.01664e-13	0.988831	0.744	0.417	2.63329e-09	9311	LOC_Os01g72530
1.02977e-13	0.840674	0.634	0.26	2.66731e-09	9311	LOC_Os10g28210
1.03248e-13	1.30692	0.645	0.291	2.67432e-09	9311	LOC_Os02g53410
1.65559e-13	0.590313	0.43	0.055	4.28831e-09	9311	LOC_Os03g31230
1.71002e-13	0.68096	0.349	0	4.42929e-09	9311	LOC_Os11g12093
1.81609e-13	0.666224	0.36	0.008	4.70403e-09	9311	LOC_Os06g40120
1.83865e-13	0.72953	0.64	0.283	4.76248e-09	9311	LOC_Os06g49780
2.03672e-13	0.682163	0.424	0.047	5.27552e-09	9311	LOC_Os05g24010
2.20243e-13	0.580685	0.424	0.047	5.70473e-09	9311	LOC_Os02g25580
2.60092e-13	0.64356	0.884	0.669	6.73691e-09	9311	LOC_Os07g33270
2.98626e-13	0.535356	0.343	0	7.73502e-09	9311	LOC_Os05g01799
3.20881e-13	0.545893	0.355	0.008	8.31146e-09	9311	LOC_Os04g56800
3.29336e-13	0.602768	0.401	0.039	8.53045e-09	9311	LOC_Os06g17390
3.56779e-13	0.599785	0.424	0.055	9.2413e-09	9311	LOC_Os05g43570
3.72391e-13	0.621802	0.605	0.197	9.64567e-09	9311	LOC_Os02g39790
3.83959e-13	0.679297	0.523	0.15	9.9453e-09	9311	LOC_Os04g35540
4.18091e-13	0.956893	0.459	0.079	1.08294e-08	9311	LOC_Os02g54530
4.20521e-13	0.919902	0.558	0.181	1.08923e-08	9311	LOC_Os01g58310
4.79084e-13	0.824478	0.453	0.079	1.24092e-08	9311	LOC_Os01g56570
5.19685e-13	1.35259	0.337	0	1.34609e-08	9311	LOC_Os04g34600
5.19685e-13	0.760938	0.337	0	1.34609e-08	9311	EVM014264
5.19685e-13	0.530947	0.337	0	1.34609e-08	9311	LOC_Os02g58324
5.19685e-13	0.527961	0.337	0	1.34609e-08	9311	LOC_Os05g43245
7.06661e-13	0.651064	0.512	0.142	1.83039e-08	9311	LOC_Os09g21230
8.29192e-13	0.80208	0.779	0.52	2.14777e-08	9311	LOC_Os01g64110
9.01215e-13	0.533165	0.331	0	2.33433e-08	9311	LOC_Os09g07615
9.01226e-13	0.484299	0.331	0	2.33435e-08	9311	EVM030255
9.0733e-13	0.637201	0.628	0.276	2.35017e-08	9311	LOC_Os01g48760
1.07002e-12	0.576266	0.407	0.047	2.77156e-08	9311	LOC_Os06g49700
1.49941e-12	0.54655	0.366	0.024	3.88378e-08	9311	LOC_Os03g21620
1.51721e-12	0.739369	0.384	0.039	3.92987e-08	9311	LOC_Os08g41320
1.55747e-12	0.587498	0.326	0	4.03416e-08	9311	LOC_Os06g01879
1.58133e-12	0.47205	0.988	0.961	4.09595e-08	9311	LOC_Os08g42000
1.76148e-12	0.665937	0.366	0.024	4.56259e-08	9311	LOC_Os04g53606
1.93504e-12	0.634685	0.89	0.638	5.01215e-08	9311	LOC_Os11g37700
2.09559e-12	0.559932	0.372	0.031	5.428e-08	9311	LOC_Os03g55389
2.12561e-12	0.890909	0.826	0.543	5.50576e-08	9311	LOC_Os05g41550
2.43194e-12	0.753712	0.762	0.449	6.29921e-08	9311	LOC_Os01g53520
2.68239e-12	0.990831	0.32	0	6.94794e-08	9311	LOC_Os08g24200
2.68243e-12	1.26515	0.32	0	6.94802e-08	9311	LOC_Os01g42864
2.68243e-12	0.538489	0.32	0	6.94802e-08	9311	LOC_Os09g12400
2.68243e-12	0.514371	0.32	0	6.94802e-08	9311	LOC_Os06g21920
2.68243e-12	0.506007	0.32	0	6.94802e-08	9311	LOC_Os06g50818
2.7434e-12	0.704118	0.529	0.15	7.10595e-08	9311	LOC_Os02g09990
3.19192e-12	0.681195	0.802	0.598	8.26772e-08	9311	LOC_Os01g01450
5.23652e-12	0.49188	0.326	0.008	1.35636e-07	9311	LOC_Os11g06240
6.44971e-12	0.57693	0.43	0.079	1.6706e-07	9311	LOC_Os09g13870
7.07971e-12	0.800905	0.558	0.205	1.83379e-07	9311	LOC_Os07g01420
7.87617e-12	0.530923	0.308	0	2.04009e-07	9311	LOC_Os05g43629
8.05606e-12	0.558274	0.442	0.087	2.08668e-07	9311	LOC_Os07g49240
8.53776e-12	0.709601	0.645	0.291	2.21145e-07	9311	LOC_Os07g44610
1.15638e-11	0.498223	0.36	0.031	2.99527e-07	9311	LOC_Os10g34270
1.15961e-11	0.536838	0.89	0.787	3.00361e-07	9311	LOC_Os05g03760
1.19004e-11	0.679338	0.407	0.063	3.08244e-07	9311	LOC_Os02g37280
1.34283e-11	0.410693	0.302	0	3.47819e-07	9311	LOC_Os01g48770
1.34284e-11	0.579916	0.302	0	3.47823e-07	9311	LOC_Os04g49660
1.34284e-11	0.572513	0.302	0	3.47823e-07	9311	LOC_Os07g39360
1.36957e-11	0.480143	0.32	0.008	3.54745e-07	9311	LOC_Os09g08910
1.4457e-11	0.485921	0.419	0.071	3.74465e-07	9311	LOC_Os04g51780
1.51354e-11	0.658646	0.558	0.205	3.92038e-07	9311	LOC_Os06g04790
1.78977e-11	0.684226	0.919	0.717	4.63587e-07	9311	LOC_Os02g38230
1.85e-11	0.643091	0.628	0.291	4.79186e-07	9311	LOC_Os03g07430
1.8711e-11	0.753093	0.488	0.142	4.84653e-07	9311	LOC_Os02g52540
1.93297e-11	0.990281	0.785	0.512	5.00678e-07	9311	LOC_Os11g10470
1.96498e-11	0.897642	0.471	0.126	5.0897e-07	9311	LOC_Os04g32950
2.2819e-11	0.502675	0.297	0	5.91057e-07	9311	LOC_Os12g07714
2.2819e-11	0.492448	0.297	0	5.91057e-07	9311	LOC_Os12g34045
2.2819e-11	0.48066	0.297	0	5.91057e-07	9311	LOC_Os06g50420
2.2819e-11	0.434867	0.297	0	5.91057e-07	9311	LOC_Os11g02600
2.2819e-11	0.430822	0.297	0	5.91057e-07	9311	EVM020728
2.58997e-11	0.652482	0.465	0.126	6.70853e-07	9311	LOC_Os07g47350
2.7291e-11	0.571682	0.349	0.031	7.06892e-07	9311	LOC_Os01g09570
3.35342e-11	0.593283	0.407	0.079	8.68604e-07	9311	LOC_Os04g31030
3.78528e-11	0.669391	0.814	0.551	9.80463e-07	9311	LOC_Os03g62790
3.86493e-11	0.499701	0.291	0	1.00109e-06	9311	LOC_Os10g39406
3.86493e-11	0.472528	0.291	0	1.00109e-06	9311	LOC_Os12g12334
3.86493e-11	0.423751	0.291	0	1.00109e-06	9311	LOC_Os09g38079
4.25988e-11	0.477034	0.983	0.827	1.10339e-06	9311	LOC_Os03g45730
4.26583e-11	0.574415	0.541	0.205	1.10494e-06	9311	LOC_Os07g12170
4.63111e-11	0.645059	0.919	0.764	1.19955e-06	9311	LOC_Os03g12820
5.14896e-11	0.525162	0.517	0.181	1.33368e-06	9311	LOC_Os04g56520
5.22945e-11	0.448183	0.314	0.016	1.35453e-06	9311	LOC_Os04g51950
5.2599e-11	0.547254	0.337	0.031	1.36242e-06	9311	LOC_Os05g04340
6.20507e-11	0.451931	0.32	0.016	1.60724e-06	9311	LOC_Os01g72970
6.5248e-11	0.448639	0.285	0	1.69005e-06	9311	LOC_Os11g01510
7.34959e-11	0.568801	0.622	0.268	1.90369e-06	9311	LOC_Os05g12260
8.23057e-11	0.747149	0.837	0.591	2.13188e-06	9311	LOC_Os09g25760
9.00753e-11	0.449467	0.314	0.016	2.33313e-06	9311	LOC_Os01g51420
1.0447e-10	0.65037	0.442	0.102	2.70597e-06	9311	LOC_Os01g74450
1.08974e-10	0.606854	0.57	0.228	2.82263e-06	9311	LOC_Os02g56250
1.098e-10	0.589809	0.279	0	2.84405e-06	9311	LOC_Os11g29614
1.098e-10	0.497979	0.279	0	2.84405e-06	9311	EVM024455
1.16041e-10	0.56949	0.401	0.079	3.00569e-06	9311	LOC_Os03g55670
1.16573e-10	0.712733	0.355	0.047	3.01948e-06	9311	LOC_Os11g37880
1.23375e-10	0.530481	0.384	0.063	3.19565e-06	9311	LOC_Os05g06280
1.30566e-10	0.587529	0.5	0.173	3.38192e-06	9311	LOC_Os04g52390
1.33223e-10	0.483395	0.291	0.008	3.45075e-06	9311	LOC_Os06g41940
1.45837e-10	0.588051	0.506	0.173	3.77748e-06	9311	LOC_Os12g25210
1.48748e-10	0.620566	0.355	0.047	3.85288e-06	9311	LOC_Os04g51940
1.52964e-10	0.736438	0.331	0.031	3.96208e-06	9311	LOC_Os01g53350
1.63086e-10	0.501553	0.343	0.039	4.22426e-06	9311	LOC_Os02g36340
1.68463e-10	0.616243	0.384	0.071	4.36353e-06	9311	LOC_Os01g72100
1.6885e-10	0.535446	0.372	0.055	4.37354e-06	9311	LOC_Os08g05480
1.73482e-10	0.743603	0.587	0.26	4.49353e-06	9311	LOC_Os10g37190
1.73806e-10	0.954628	0.616	0.315	4.50192e-06	9311	LOC_Os07g42200
1.84182e-10	0.576834	0.273	0	4.77068e-06	9311	LOC_Os03g06710
1.84182e-10	0.498559	0.273	0	4.77068e-06	9311	LOC_Os03g06620
1.84182e-10	0.467597	0.273	0	4.77068e-06	9311	LOC_Os09g18406
1.84182e-10	0.43211	0.273	0	4.77068e-06	9311	LOC_Os01g46709
1.84182e-10	0.422948	0.273	0	4.77068e-06	9311	LOC_Os03g19410
1.84182e-10	0.405652	0.273	0	4.77068e-06	9311	LOC_Os05g07729
1.84182e-10	0.400165	0.273	0	4.77068e-06	9311	LOC_Os06g15689
1.843e-10	0.408793	0.291	0.008	4.77374e-06	9311	LOC_Os12g41700
1.84817e-10	0.608093	0.843	0.638	4.78713e-06	9311	LOC_Os03g10050
2.22777e-10	0.500729	0.285	0.008	5.77036e-06	9311	LOC_Os10g25150
2.58566e-10	0.586088	0.855	0.748	6.69737e-06	9311	LOC_Os06g41010
2.81065e-10	0.593831	0.75	0.488	7.28015e-06	9311	LOC_Os01g56930
2.89213e-10	0.445983	0.337	0.039	7.49118e-06	9311	LOC_Os01g49026
2.8948e-10	0.828282	0.552	0.252	7.4981e-06	9311	LOC_Os03g04770
3.00684e-10	0.58345	0.401	0.087	7.78831e-06	9311	LOC_Os01g42730
3.07975e-10	0.504828	0.267	0	7.97717e-06	9311	LOC_Os05g43119
3.07975e-10	0.425359	0.267	0	7.97717e-06	9311	LOC_Os03g19049
3.07975e-10	0.415909	0.267	0	7.97717e-06	9311	LOC_Os10g24006
3.07975e-10	0.409283	0.267	0	7.97717e-06	9311	LOC_Os08g20594
3.17009e-10	0.52369	0.326	0.031	8.21117e-06	9311	LOC_Os02g46660
3.82853e-10	0.615036	0.698	0.402	9.91665e-06	9311	LOC_Os08g43270
3.97707e-10	0.557474	0.756	0.402	1.03014e-05	9311	LOC_Os02g11870
4.19156e-10	0.738339	0.366	0.063	1.0857e-05	9311	LOC_Os11g05400
4.22833e-10	0.456387	0.32	0.031	1.09522e-05	9311	LOC_Os07g31850
4.62824e-10	0.528046	0.384	0.071	1.19881e-05	9311	LOC_Os01g12800
5.13362e-10	0.589608	0.262	0	1.32971e-05	9311	LOC_Os03g25164
5.13362e-10	0.458196	0.262	0	1.32971e-05	9311	LOC_Os03g64264
5.13362e-10	0.442889	0.262	0	1.32971e-05	9311	LOC_Os04g17664
5.38206e-10	0.556919	0.494	0.15	1.39406e-05	9311	LOC_Os05g32380
5.77943e-10	0.359708	0.994	0.992	1.49699e-05	9311	LOC_Os04g02670
5.92598e-10	0.469784	0.965	0.898	1.53495e-05	9311	LOC_Os07g46800
5.92674e-10	0.751559	0.61	0.283	1.53514e-05	9311	LOC_Os03g59360
7.00896e-10	0.570258	0.983	1	1.81546e-05	9311	LOC_Os05g04450
7.5187e-10	0.499359	0.977	0.913	1.94749e-05	9311	LOC_Os10g35770
7.58308e-10	0.391373	0.291	0.016	1.96417e-05	9311	LOC_Os07g43060
7.67826e-10	0.809284	0.936	0.89	1.98882e-05	9311	LOC_Os11g04409
8.08648e-10	0.581073	0.797	0.52	2.09456e-05	9311	LOC_Os01g32380
8.36439e-10	0.683457	0.907	0.795	2.16654e-05	9311	LOC_Os12g42200
8.5307e-10	0.523826	0.256	0	2.20962e-05	9311	LOC_Os11g19871
8.5307e-10	0.444444	0.256	0	2.20962e-05	9311	LOC_Os02g31010
8.5307e-10	0.415	0.256	0	2.20962e-05	9311	LOC_Os01g14709
8.5307e-10	0.401966	0.256	0	2.20962e-05	9311	LOC_Os10g02936
9.42682e-10	0.606322	0.634	0.307	2.44173e-05	9311	LOC_Os12g39640
9.844e-10	0.512606	0.61	0.331	2.54979e-05	9311	LOC_Os01g55780
1.01387e-09	0.747775	0.68	0.441	2.62612e-05	9311	LOC_Os01g50820
1.02739e-09	0.456411	0.413	0.094	2.66116e-05	9311	LOC_Os02g48670
1.32583e-09	0.517815	0.419	0.102	3.43416e-05	9311	LOC_Os04g52600
1.41323e-09	0.477974	0.25	0	3.66054e-05	9311	LOC_Os04g56044
1.46442e-09	0.428968	0.267	0.008	3.79314e-05	9311	LOC_Os04g33210
1.54472e-09	0.39695	0.297	0.024	4.00113e-05	9311	LOC_Os04g48730
1.62068e-09	0.584077	0.651	0.37	4.1979e-05	9311	LOC_Os01g57260
1.62889e-09	0.496366	0.413	0.102	4.21916e-05	9311	LOC_Os03g19020
1.70872e-09	0.563568	0.442	0.134	4.42592e-05	9311	LOC_Os01g17330
1.70922e-09	0.580971	0.628	0.339	4.42722e-05	9311	LOC_Os02g57650
1.9711e-09	0.43815	0.291	0.024	5.10555e-05	9311	LOC_Os01g39330
2.18152e-09	0.500469	0.302	0.031	5.65058e-05	9311	LOC_Os02g01220
2.23349e-09	0.781792	0.733	0.488	5.78519e-05	9311	LOC_Os12g36240
2.3341e-09	0.434377	0.244	0	6.04579e-05	9311	LOC_Os01g67824
2.3341e-09	0.329115	0.244	0	6.04579e-05	9311	EVM014147
2.41285e-09	0.462461	0.378	0.079	6.24976e-05	9311	LOC_Os01g43420
2.41911e-09	0.752469	0.547	0.22	6.26597e-05	9311	LOC_Os01g72150
2.65274e-09	0.43472	0.273	0.016	6.87112e-05	9311	LOC_Os01g03760
2.89211e-09	0.353796	0.256	0.008	7.49113e-05	9311	LOC_Os02g01240
3.08828e-09	0.610794	0.547	0.26	7.99926e-05	9311	LOC_Os07g42940
3.30786e-09	0.237125	1	1	8.56802e-05	9311	LOC_Os07g48244
3.59557e-09	0.596658	0.831	0.654	9.31325e-05	9311	LOC_Os03g60540
3.68046e-09	0.241237	1	1	9.53313e-05	9311	LOC_Os06g02470
3.84342e-09	0.391281	0.238	0	9.95522e-05	9311	LOC_Os03g43989
3.84346e-09	0.626835	0.238	0	9.95534e-05	9311	LOC_Os08g31260
3.84346e-09	0.467012	0.238	0	9.95534e-05	9311	LOC_Os06g05034
3.84346e-09	0.45653	0.238	0	9.95534e-05	9311	LOC_Os07g44830
3.84346e-09	0.452871	0.238	0	9.95534e-05	9311	LOC_Os06g07030
4.09822e-09	0.407817	0.343	0.063	0.000106152	9311	LOC_Os09g36450
4.27197e-09	0.543813	0.814	0.567	0.000110653	9311	LOC_Os12g29400
4.41305e-09	0.390622	0.297	0.031	0.000114307	9311	LOC_Os05g05270
4.80966e-09	0.429133	0.25	0.008	0.00012458	9311	LOC_Os03g21690
5.35164e-09	0.424602	0.291	0.031	0.000138618	9311	LOC_Os08g38220
5.7957e-09	0.574755	0.39	0.102	0.00015012	9311	LOC_Os06g03682
6.07578e-09	0.508981	0.692	0.433	0.000157375	9311	LOC_Os05g41670
6.1864e-09	0.431138	0.291	0.031	0.00016024	9311	LOC_Os03g59170
6.20686e-09	0.504089	0.448	0.15	0.00016077	9311	LOC_Os03g52760
6.2306e-09	0.490922	0.512	0.197	0.000161385	9311	LOC_Os02g47090
6.31007e-09	0.442255	0.233	0	0.000163443	9311	LOC_Os02g05329
6.31007e-09	0.384538	0.233	0	0.000163443	9311	LOC_Os01g25274
6.31007e-09	0.361818	0.233	0	0.000163443	9311	LOC_Os10g34803
6.31007e-09	0.331025	0.233	0	0.000163443	9311	LOC_Os04g35226
6.31007e-09	0.330239	0.233	0	0.000163443	9311	EVM021700
6.42697e-09	0.605076	0.715	0.465	0.000166471	9311	LOC_Os08g30740
6.63978e-09	0.394168	0.279	0.024	0.000171984	9311	LOC_Os11g41820
7.27119e-09	0.556041	0.674	0.409	0.000188338	9311	LOC_Os09g31454
8.362e-09	0.885245	0.297	0.039	0.000216592	9311	LOC_Os08g08980
9.27429e-09	0.629929	0.488	0.189	0.000240223	9311	LOC_Os05g50810
9.33825e-09	0.375219	0.994	1	0.000241879	9311	LOC_Os05g08420
9.72607e-09	0.51604	0.477	0.181	0.000251925	9311	LOC_Os03g43400
9.7923e-09	0.36553	0.971	0.969	0.00025364	9311	LOC_Os03g10510
1.00417e-08	0.446059	0.384	0.102	0.000260099	9311	LOC_Os11g38990
1.00492e-08	0.5364	0.36	0.079	0.000260294	9311	LOC_Os07g35300
1.02241e-08	0.696471	0.779	0.622	0.000264825	9311	LOC_Os08g27840
1.03293e-08	0.479431	0.227	0	0.000267549	9311	LOC_Os04g44314
1.03293e-08	0.377691	0.227	0	0.000267549	9311	LOC_Os03g19959
1.03293e-08	0.377387	0.227	0	0.000267549	9311	LOC_Os06g12390
1.03293e-08	0.365153	0.227	0	0.000267549	9311	LOC_Os07g10246
1.03293e-08	0.322629	0.227	0	0.000267549	9311	LOC_Os07g44290
1.06746e-08	0.509854	0.424	0.126	0.000276492	9311	LOC_Os03g48260
1.08643e-08	0.577673	0.413	0.126	0.000281407	9311	LOC_Os12g32610
1.12051e-08	0.423141	0.744	0.496	0.000290233	9311	LOC_Os08g32870
1.18006e-08	0.469042	0.355	0.079	0.000305659	9311	LOC_Os03g49430
1.21666e-08	0.898098	0.75	0.567	0.000315139	9311	LOC_Os10g30340
1.22913e-08	0.49013	0.808	0.567	0.00031837	9311	LOC_Os08g31580
1.38285e-08	0.445907	0.297	0.039	0.000358186	9311	LOC_Os10g35960
1.39574e-08	0.533601	0.797	0.606	0.000361525	9311	LOC_Os10g41550
1.48016e-08	0.304858	0.994	0.984	0.000383391	9311	LOC_Os03g03770
1.51773e-08	0.561558	0.535	0.268	0.000393123	9311	LOC_Os01g12910
1.65275e-08	0.456278	1	0.976	0.000428095	9311	LOC_Os09g21710
1.68593e-08	0.367691	0.221	0	0.00043669	9311	EVM031447
1.68595e-08	0.450485	0.221	0	0.000436695	9311	LOC_Os11g42989
1.68595e-08	0.376914	0.221	0	0.000436695	9311	LOC_Os03g63539
1.68595e-08	0.347651	0.221	0	0.000436695	9311	LOC_Os02g40900
1.68595e-08	0.322341	0.221	0	0.000436695	9311	LOC_Os09g28910
1.68595e-08	0.315158	0.221	0	0.000436695	9311	LOC_Os05g46845
1.68595e-08	0.305253	0.221	0	0.000436695	9311	LOC_Os05g11005
1.84382e-08	0.406227	0.302	0.047	0.000477586	9311	LOC_Os03g60130
2.09736e-08	0.464891	0.314	0.055	0.000543259	9311	LOC_Os05g01600
2.11811e-08	0.627745	0.581	0.307	0.000548632	9311	LOC_Os01g15610
2.14226e-08	0.495167	0.872	0.74	0.000554888	9311	LOC_Os01g14440
2.31972e-08	0.718033	0.25	0.016	0.000600855	9311	LOC_Os04g52750
2.40226e-08	0.572948	0.331	0.071	0.000622233	9311	LOC_Os09g35010
2.50633e-08	0.339766	0.233	0.008	0.00064919	9311	LOC_Os02g47220
2.64662e-08	0.374509	0.273	0.031	0.000685528	9311	LOC_Os01g14860
2.70776e-08	0.413897	0.244	0.016	0.000701363	9311	LOC_Os02g38080
2.71878e-08	0.49985	0.983	0.906	0.000704219	9311	LOC_Os02g03710
2.74391e-08	0.324378	0.215	0	0.000710728	9311	LOC_Os08g02905
2.74394e-08	0.433449	0.215	0	0.000710735	9311	LOC_Os01g48714
2.74394e-08	0.38425	0.215	0	0.000710735	9311	LOC_Os05g43059
2.74394e-08	0.382164	0.215	0	0.000710735	9311	LOC_Os11g10070
2.74394e-08	0.379464	0.215	0	0.000710735	9311	LOC_Os04g52464
2.74394e-08	0.35548	0.215	0	0.000710735	9311	LOC_Os02g09920
2.74394e-08	0.318883	0.215	0	0.000710735	9311	LOC_Os07g25196
2.74394e-08	0.27878	0.215	0	0.000710735	9311	LOC_Os07g06130
2.80962e-08	0.324498	0.262	0.024	0.000727748	9311	LOC_Os08g33720
2.84125e-08	0.701063	0.273	0.031	0.00073594	9311	LOC_Os10g40470
3.08312e-08	0.359328	0.988	0.984	0.00079859	9311	LOC_Os09g38740
3.13764e-08	0.487104	0.866	0.717	0.000812712	9311	LOC_Os06g46970
3.28777e-08	0.380513	0.262	0.024	0.000851599	9311	LOC_Os02g58560
3.54456e-08	0.520041	0.331	0.071	0.000918111	9311	LOC_Os11g30290
3.58807e-08	0.48314	0.576	0.307	0.000929382	9311	LOC_Os01g08090
3.68082e-08	0.293452	1	1	0.000953406	9311	LOC_Os03g38520
3.89403e-08	0.667843	0.762	0.669	0.00100863	9311	LOC_Os05g35740
4.06237e-08	0.321258	0.227	0.008	0.00105224	9311	LOC_Os01g43410
4.3865e-08	0.371128	0.273	0.031	0.00113619	9311	LOC_Os04g56400
4.40205e-08	0.592714	0.622	0.37	0.00114022	9311	LOC_Os10g38580
4.45323e-08	0.380957	0.209	0	0.00115348	9311	LOC_Os06g48520
4.45323e-08	0.309362	0.209	0	0.00115348	9311	LOC_Os09g39462
4.46242e-08	0.344553	0.256	0.024	0.00115586	9311	LOC_Os03g07610
4.46505e-08	0.608285	0.733	0.488	0.00115654	9311	LOC_Os02g33710
4.64504e-08	0.54114	0.541	0.268	0.00120316	9311	LOC_Os01g34480
4.70623e-08	0.465507	0.872	0.787	0.00121901	9311	LOC_Os03g19890
4.80485e-08	0.316923	0.227	0.008	0.00124455	9311	LOC_Os06g44890
5.38898e-08	0.568555	0.686	0.512	0.00139585	9311	LOC_Os04g21950
5.52334e-08	0.562636	0.674	0.465	0.00143065	9311	LOC_Os03g11060
5.68416e-08	0.61118	0.372	0.11	0.00147231	9311	LOC_Os05g30510
5.91371e-08	0.460576	0.419	0.142	0.00153177	9311	LOC_Os08g01290
5.99826e-08	0.454826	0.221	0.008	0.00155367	9311	LOC_Os04g28250
6.51952e-08	0.488855	0.337	0.079	0.00168869	9311	LOC_Os01g01870
6.53775e-08	0.578686	0.843	0.701	0.00169341	9311	LOC_Os04g39600
6.57104e-08	0.536949	0.448	0.173	0.00170203	9311	LOC_Os07g07670
6.57575e-08	0.424872	0.25	0.024	0.00170325	9311	LOC_Os01g51410
6.61508e-08	0.361688	1	0.992	0.00171344	9311	LOC_Os02g03280
6.72766e-08	0.537801	0.453	0.181	0.0017426	9311	LOC_Os05g41590
6.91198e-08	0.459638	0.895	0.882	0.00179034	9311	LOC_Os04g53620
6.93258e-08	0.463544	0.57	0.268	0.00179568	9311	LOC_Os01g04409
7.14424e-08	0.491784	0.715	0.457	0.0018505	9311	LOC_Os06g48350
7.20714e-08	0.31944	0.203	0	0.00186679	9311	LOC_Os01g42016
7.20714e-08	0.308589	0.203	0	0.00186679	9311	LOC_Os08g06344
7.44329e-08	0.39377	0.279	0.039	0.00192796	9311	LOC_Os03g42750
7.60468e-08	0.763047	0.826	0.693	0.00196976	9311	LOC_Os07g06830
7.66169e-08	0.411147	0.221	0.008	0.00198453	9311	LOC_Os02g27400
7.8252e-08	0.41653	0.442	0.157	0.00202688	9311	LOC_Os07g41810
7.83653e-08	0.537843	0.401	0.142	0.00202982	9311	LOC_Os04g52500
8.33529e-08	0.54497	0.884	0.803	0.00215901	9311	LOC_Os03g55240
8.48353e-08	0.443836	0.453	0.181	0.0021974	9311	LOC_Os02g49960
8.7045e-08	0.489706	0.605	0.299	0.00225464	9311	LOC_Os08g37630
8.86814e-08	0.333806	0.25	0.024	0.00229703	9311	LOC_Os04g58330
9.03262e-08	0.459158	0.855	0.701	0.00233963	9311	LOC_Os03g20780
9.87431e-08	0.78373	0.407	0.142	0.00255764	9311	LOC_Os05g45450
9.92682e-08	0.572683	0.506	0.26	0.00257124	9311	LOC_Os05g11950
1.02131e-07	0.460087	0.401	0.126	0.0026454	9311	LOC_Os02g52620
1.05819e-07	0.452094	0.215	0.008	0.00274092	9311	LOC_Os11g37960
1.06804e-07	0.453663	0.552	0.252	0.00276643	9311	LOC_Os05g37130
1.07259e-07	0.481553	0.494	0.228	0.00277822	9311	LOC_Os02g39400
1.1021e-07	0.573622	0.628	0.378	0.00285465	9311	LOC_Os01g64170
1.11332e-07	0.460903	0.86	0.772	0.00288372	9311	LOC_Os01g15640
1.1632e-07	0.311394	0.198	0	0.00301293	9311	EVM036215
1.1632e-07	0.295354	0.198	0	0.00301293	9311	LOC_Os06g48749
1.1632e-07	0.284829	0.198	0	0.00301293	9311	LOC_Os06g21854
1.1632e-07	0.273869	0.198	0	0.00301293	9311	LOC_Os03g36931
1.1632e-07	0.267147	0.198	0	0.00301293	9311	LOC_Os03g38720
1.26117e-07	0.512177	0.698	0.409	0.00326668	9311	LOC_Os02g12480
1.33598e-07	0.515798	0.494	0.244	0.00346045	9311	LOC_Os06g39912
1.46441e-07	0.447614	0.529	0.244	0.00379312	9311	LOC_Os05g04620
1.55482e-07	0.350273	0.209	0.008	0.0040273	9311	LOC_Os11g10760
1.55938e-07	0.43945	0.785	0.622	0.00403911	9311	LOC_Os10g42710
1.56049e-07	0.522974	0.64	0.425	0.00404198	9311	LOC_Os04g53190
1.83258e-07	0.485911	0.552	0.299	0.00474675	9311	LOC_Os02g43930
1.84244e-07	0.374144	0.238	0.024	0.00477228	9311	LOC_Os07g13800
1.87227e-07	0.391267	0.192	0	0.00484957	9311	LOC_Os07g44850
1.87227e-07	0.365176	0.192	0	0.00484957	9311	LOC_Os03g31570
1.87227e-07	0.307139	0.192	0	0.00484957	9311	LOC_Os07g07934
1.87227e-07	0.302569	0.192	0	0.00484957	9311	LOC_Os06g08014
1.87227e-07	0.282366	0.192	0	0.00484957	9311	LOC_Os06g43169
2.07209e-07	0.439936	0.32	0.071	0.00536713	9311	LOC_Os03g62480
2.2728e-07	0.559896	0.36	0.118	0.00588701	9311	LOC_Os06g43810
2.4859e-07	0.407585	0.331	0.087	0.00643897	9311	LOC_Os03g20340
2.50203e-07	0.364112	0.267	0.039	0.00648076	9311	LOC_Os03g25140
2.60453e-07	0.32304	0.25	0.031	0.00674626	9311	LOC_Os10g22330
2.61023e-07	0.303457	0.221	0.016	0.00676102	9311	LOC_Os02g35190
2.72647e-07	0.309396	0.233	0.024	0.00706211	9311	LOC_Os12g08280
2.75984e-07	0.526481	0.401	0.15	0.00714855	9311	LOC_Os04g53230
2.96444e-07	0.506697	0.61	0.394	0.0076785	9311	LOC_Os06g49790
3.00555e-07	0.513389	0.186	0	0.00778498	9311	LOC_Os02g43644
3.00555e-07	0.346329	0.186	0	0.00778498	9311	LOC_Os01g26996
3.00555e-07	0.312277	0.186	0	0.00778498	9311	LOC_Os11g16299
3.00555e-07	0.304652	0.186	0	0.00778498	9311	LOC_Os10g42649
3.00555e-07	0.301472	0.186	0	0.00778498	9311	LOC_Os10g26359
3.00555e-07	0.288818	0.186	0	0.00778498	9311	LOC_Os06g17076
3.01998e-07	0.450581	0.355	0.102	0.00782235	9311	LOC_Os08g31940
3.3186e-07	0.484211	0.378	0.118	0.00859584	9311	LOC_Os08g15420
3.71075e-07	0.440034	0.349	0.102	0.00961158	9311	LOC_Os11g04320
3.75432e-07	0.39285	0.262	0.039	0.00972444	9311	LOC_Os04g37990
4.10105e-07	0.394073	0.238	0.031	0.0106225	9311	LOC_Os01g03730
4.2061e-07	0.299473	0.233	0.024	0.0108946	9311	LOC_Os09g32040
4.24813e-07	0.32614	0.198	0.008	0.0110035	9311	LOC_Os11g11810
4.46174e-07	0.456865	0.93	0.819	0.0115568	9311	LOC_Os01g07970
4.81215e-07	0.395197	0.18	0	0.0124644	9311	LOC_Os09g25749
4.81215e-07	0.304646	0.18	0	0.0124644	9311	LOC_Os03g60950
4.81215e-07	0.286355	0.18	0	0.0124644	9311	LOC_Os02g46424
4.81215e-07	0.271168	0.18	0	0.0124644	9311	LOC_Os03g62808
4.91323e-07	0.298311	0.227	0.024	0.0127262	9311	LOC_Os06g01680
5.11634e-07	0.498197	0.721	0.543	0.0132523	9311	LOC_Os06g50330
5.1287e-07	0.356683	0.25	0.039	0.0132844	9311	LOC_Os02g42020
5.43245e-07	0.409222	0.331	0.094	0.0140711	9311	LOC_Os05g06520
5.50372e-07	0.41933	0.901	0.772	0.0142557	9311	LOC_Os01g51920
5.6212e-07	0.307629	0.215	0.016	0.01456	9311	LOC_Os06g07580
5.75585e-07	0.560447	0.669	0.449	0.0149088	9311	LOC_Os07g42960
5.83336e-07	0.482484	0.599	0.362	0.0151096	9311	LOC_Os04g32560
5.90378e-07	0.438253	0.837	0.677	0.015292	9311	LOC_Os01g58150
5.94865e-07	0.361085	0.285	0.063	0.0154082	9311	LOC_Os05g01270
6.08701e-07	0.528539	0.512	0.26	0.0157666	9311	LOC_Os08g36410
6.16186e-07	0.560544	0.93	0.929	0.0159605	9311	LOC_Os03g59440
6.17056e-07	0.768713	0.581	0.354	0.015983	9311	LOC_Os12g40180
6.44562e-07	0.408067	0.209	0.016	0.0166955	9311	LOC_Os06g37070
6.7252e-07	0.444429	0.837	0.74	0.0174196	9311	LOC_Os02g41590
6.75592e-07	0.337011	0.314	0.079	0.0174992	9311	LOC_Os06g35814
6.80161e-07	0.211257	1	1	0.0176175	9311	LOC_Os05g40300
6.82689e-07	0.451079	0.82	0.638	0.017683	9311	LOC_Os02g19770
6.93715e-07	0.364831	0.297	0.071	0.0179686	9311	LOC_Os06g51480
7.09944e-07	0.510522	0.453	0.228	0.018389	9311	LOC_Os12g43620
7.1363e-07	0.433876	0.581	0.339	0.0184844	9311	LOC_Os05g03550
7.26205e-07	0.359902	0.297	0.063	0.0188102	9311	LOC_Os03g11440
7.26497e-07	0.660103	0.326	0.094	0.0188177	9311	LOC_Os12g10220
7.538e-07	0.428142	0.209	0.016	0.0195249	9311	LOC_Os04g05650
7.56317e-07	0.550463	0.401	0.157	0.0195901	9311	LOC_Os04g52370
7.68482e-07	0.265787	0.174	0	0.0199052	9311	LOC_Os04g43534
8.83617e-07	0.280816	0.203	0.016	0.0228874	9311	LOC_Os02g07680
8.98937e-07	0.407159	0.669	0.433	0.0232843	9311	LOC_Os02g50210
9.33065e-07	0.649679	0.355	0.126	0.0241683	9311	LOC_Os01g49710
9.43504e-07	0.387338	0.605	0.37	0.0244386	9311	LOC_Os03g17020
9.84708e-07	0.539646	0.413	0.157	0.0255059	9311	LOC_Os03g55960
9.94369e-07	0.494829	0.401	0.157	0.0257561	9311	LOC_Os02g09810
1.03336e-06	0.30116	0.203	0.016	0.0267662	9311	LOC_Os02g09740
1.04846e-06	0.353345	0.285	0.063	0.0271573	9311	LOC_Os08g07880
1.07709e-06	0.309193	0.186	0.008	0.0278987	9311	LOC_Os03g22740
1.11162e-06	0.431448	0.43	0.181	0.0287932	9311	LOC_Os02g47000
1.18858e-06	0.418424	0.802	0.701	0.0307867	9311	LOC_Os04g02830
1.21093e-06	0.955617	0.395	0.15	0.0313656	9311	LOC_Os10g31710
1.22413e-06	0.343053	0.169	0	0.0317075	9311	LOC_Os04g51680
1.22413e-06	0.338014	0.169	0	0.0317075	9311	LOC_Os06g15754
1.22413e-06	0.327413	0.169	0	0.0317075	9311	LOC_Os03g42464
1.22413e-06	0.310415	0.169	0	0.0317075	9311	LOC_Os07g12782
1.22413e-06	0.297802	0.169	0	0.0317075	9311	LOC_Os12g06890
1.22413e-06	0.287548	0.169	0	0.0317075	9311	LOC_Os08g38410
1.22413e-06	0.272029	0.169	0	0.0317075	9311	LOC_Os04g49794
1.22413e-06	0.252458	0.169	0	0.0317075	9311	LOC_Os06g44500
1.22413e-06	0.240395	0.169	0	0.0317075	9311	LOC_Os01g10290
1.22413e-06	0.23295	0.169	0	0.0317075	9311	LOC_Os06g08005
1.22752e-06	0.39442	0.942	0.89	0.0317952	9311	LOC_Os03g60570
1.248e-06	0.236116	1	1	0.0323257	9311	LOC_Os07g02340
1.27531e-06	0.593383	0.407	0.157	0.033033	9311	LOC_Os01g72130
1.28749e-06	0.453269	0.297	0.079	0.0333487	9311	LOC_Os06g05440
1.3844e-06	0.47075	0.424	0.197	0.0358588	9311	LOC_Os01g57420
1.38683e-06	0.405198	0.983	1	0.0359216	9311	LOC_Os01g27390
1.425e-06	0.299972	0.988	0.992	0.0369103	9311	LOC_Os06g13680
1.45025e-06	0.327807	0.215	0.024	0.0375645	9311	LOC_Os02g47570
1.5403e-06	0.400396	0.802	0.685	0.0398969	9311	LOC_Os03g15940
1.6335e-06	0.459297	0.698	0.543	0.042311	9311	LOC_Os05g44990
1.68477e-06	0.430458	0.395	0.157	0.0436388	9311	LOC_Os08g37690
1.69296e-06	0.385121	0.977	0.976	0.0438509	9311	LOC_Os03g60560
1.7308e-06	0.523353	0.547	0.291	0.0448312	9311	LOC_Os08g03400
1.76288e-06	0.291265	0.227	0.031	0.0456621	9311	LOC_Os10g20240
1.79751e-06	0.410011	0.651	0.402	0.0465591	9311	LOC_Os05g25770
1.81895e-06	0.323787	0.18	0.008	0.0471145	9311	LOC_Os03g30220
1.88305e-06	0.307325	0.198	0.016	0.0487748	9311	LOC_Os12g38650
1.88855e-06	0.274004	0.18	0.008	0.0489172	9311	LOC_Os04g35170
1.91515e-06	0.337457	0.953	0.953	0.0496063	9311	LOC_Os01g70790
1.94513e-06	0.290035	0.163	0	0.0503826	9311	LOC_Os09g35560
1.94513e-06	0.264782	0.163	0	0.0503826	9311	EVM022699
1.94513e-06	0.259286	0.163	0	0.0503826	9311	LOC_Os08g37500
1.94513e-06	0.243932	0.163	0	0.0503826	9311	LOC_Os04g55250
1.94513e-06	0.242725	0.163	0	0.0503826	9311	LOC_Os01g73011
1.94513e-06	0.241409	0.163	0	0.0503826	9311	LOC_Os03g46219
1.94513e-06	0.231497	0.163	0	0.0503826	9311	LOC_Os04g56450
1.94728e-06	0.371161	0.959	0.882	0.0504385	9311	LOC_Os03g08860
2.00224e-06	0.456187	0.64	0.425	0.051862	9311	LOC_Os01g72690
2.02813e-06	0.453588	0.209	0.024	0.0525326	9311	LOC_Os01g52230
2.05467e-06	0.442064	0.517	0.283	0.05322	9311	LOC_Os05g50180
2.09383e-06	0.562751	0.36	0.118	0.0542343	9311	LOC_Os09g35020
2.13974e-06	0.363577	0.267	0.055	0.0554235	9311	LOC_Os05g41460
2.15046e-06	0.304691	0.192	0.016	0.0557012	9311	LOC_Os07g47460
2.15605e-06	0.372518	0.779	0.661	0.055846	9311	LOC_Os06g03600
2.20095e-06	0.390515	0.297	0.079	0.0570091	9311	LOC_Os06g03670
2.25037e-06	0.407628	0.547	0.307	0.0582892	9311	LOC_Os01g03060
2.32551e-06	0.40315	0.855	0.724	0.0602354	9311	LOC_Os05g49890
2.41636e-06	0.415645	0.233	0.039	0.0625885	9311	LOC_Os03g07170
2.70238e-06	0.563702	0.587	0.37	0.0699971	9311	LOC_Os04g52900
2.75559e-06	0.365844	0.924	0.835	0.0713753	9311	LOC_Os08g32080
2.80614e-06	0.293984	0.174	0.008	0.0726846	9311	LOC_Os11g42790
2.821e-06	0.588016	0.36	0.15	0.0730694	9311	LOC_Os01g74152
2.84139e-06	0.233677	0.174	0.008	0.0735977	9311	LOC_Os12g01922
2.92327e-06	0.413449	0.622	0.441	0.0757185	9311	LOC_Os02g54890
3.06595e-06	0.300362	0.203	0.024	0.0794143	9311	LOC_Os01g61670
3.08325e-06	0.440138	0.157	0	0.0798624	9311	LOC_Os06g08210
3.08328e-06	0.268798	0.157	0	0.0798632	9311	LOC_Os05g11140
3.08328e-06	0.262418	0.157	0	0.0798632	9311	LOC_Os06g05380
3.08328e-06	0.257895	0.157	0	0.0798632	9311	LOC_Os09g30254
3.08328e-06	0.256756	0.157	0	0.0798632	9311	LOC_Os02g48680
3.08328e-06	0.241345	0.157	0	0.0798632	9311	LOC_Os10g39130
3.08328e-06	0.236278	0.157	0	0.0798632	9311	LOC_Os09g36920
3.08328e-06	0.230224	0.157	0	0.0798632	9311	LOC_Os02g05659
3.08328e-06	0.229932	0.157	0	0.0798632	9311	EVM029068
3.10888e-06	0.380125	0.337	0.11	0.0805263	9311	LOC_Os10g17940
3.1778e-06	0.375807	0.855	0.693	0.0823114	9311	LOC_Os08g44390
3.43441e-06	0.300882	0.203	0.024	0.0889582	9311	LOC_Os05g48570
3.5677e-06	0.421949	0.459	0.22	0.0924105	9311	LOC_Os04g40910
3.61081e-06	0.32392	0.227	0.039	0.0935273	9311	LOC_Os01g27720
3.62942e-06	0.349511	0.32	0.102	0.0940093	9311	LOC_Os07g27320
3.86408e-06	0.365619	0.256	0.055	0.100088	9311	LOC_Os08g15840
4.02896e-06	0.428444	0.552	0.323	0.104358	9311	LOC_Os08g09200
4.11119e-06	0.404871	0.669	0.528	0.106488	9311	LOC_Os10g42540
4.45381e-06	0.68827	0.436	0.213	0.115363	9311	LOC_Os01g37810
4.54483e-06	0.258335	0.186	0.016	0.11772	9311	LOC_Os03g52040
4.60236e-06	0.485731	0.814	0.811	0.11921	9311	LOC_Os03g05730
4.67488e-06	0.354548	0.541	0.283	0.121089	9311	LOC_Os08g33420
4.77414e-06	0.350749	0.285	0.079	0.12366	9311	LOC_Os03g30290
4.8299e-06	0.258467	0.169	0.008	0.125104	9311	LOC_Os09g36190
4.87186e-06	0.348547	0.343	0.118	0.126191	9311	LOC_Os01g18100
4.87586e-06	0.357433	0.151	0	0.126295	9311	LOC_Os01g64100
4.87586e-06	0.316576	0.151	0	0.126295	9311	LOC_Os02g05060
4.87586e-06	0.216198	0.151	0	0.126295	9311	LOC_Os01g64644
5.09502e-06	0.359194	0.308	0.094	0.131971	9311	LOC_Os09g24700
5.73651e-06	0.766974	0.384	0.165	0.148587	9311	LOC_Os11g05170
5.84441e-06	0.47221	0.616	0.417	0.151382	9311	LOC_Os01g09770
5.88252e-06	0.357189	0.238	0.047	0.152369	9311	LOC_Os07g32010
5.97501e-06	0.573544	0.727	0.559	0.154765	9311	LOC_Os12g43490
6.23582e-06	0.464204	0.547	0.331	0.16152	9311	LOC_Os03g07380
6.37294e-06	0.441598	0.663	0.433	0.165072	9311	LOC_Os11g08950
6.49622e-06	0.292345	0.988	1	0.168265	9311	LOC_Os05g41060
6.55165e-06	0.404444	0.517	0.307	0.169701	9311	LOC_Os10g03550
6.77605e-06	0.509065	0.413	0.205	0.175513	9311	LOC_Os07g41790
7.05691e-06	0.235343	0.163	0.008	0.182788	9311	LOC_Os02g42990
7.11637e-06	0.263874	0.18	0.016	0.184328	9311	LOC_Os03g61100
7.41183e-06	0.479156	0.488	0.26	0.191981	9311	LOC_Os03g25940
7.54375e-06	0.299795	0.18	0.016	0.195398	9311	LOC_Os01g44050
7.69287e-06	0.280694	0.145	0	0.199261	9311	LOC_Os04g51152
7.69287e-06	0.265356	0.145	0	0.199261	9311	LOC_Os11g40390
7.69287e-06	0.251684	0.145	0	0.199261	9311	LOC_Os05g34240
7.69287e-06	0.239023	0.145	0	0.199261	9311	LOC_Os02g42859
7.69287e-06	0.23609	0.145	0	0.199261	9311	LOC_Os08g03584
7.69287e-06	0.224026	0.145	0	0.199261	9311	LOC_Os06g17120
7.69287e-06	0.209868	0.145	0	0.199261	9311	EVM001637
7.69287e-06	0.203222	0.145	0	0.199261	9311	LOC_Os09g17830
7.92151e-06	0.287206	0.221	0.039	0.205183	9311	LOC_Os01g64300
8.51648e-06	0.756277	0.221	0.039	0.220594	9311	LOC_Os08g24300
9.20815e-06	0.370421	0.471	0.236	0.238509	9311	LOC_Os04g12010
9.57382e-06	0.362443	0.552	0.323	0.247981	9311	LOC_Os05g34650
9.99031e-06	0.358801	0.273	0.079	0.258769	9311	LOC_Os06g48600
1.00419e-05	0.484656	0.512	0.299	0.260104	9311	LOC_Os10g28610
1.01827e-05	0.37653	0.82	0.654	0.263752	9311	LOC_Os05g42424
1.0591e-05	0.283973	0.215	0.039	0.274328	9311	LOC_Os11g29630
1.08322e-05	0.409621	0.36	0.15	0.280576	9311	LOC_Os11g02070
1.13933e-05	0.523172	0.552	0.362	0.295108	9311	LOC_Os04g42980
1.14283e-05	0.425276	0.314	0.11	0.296015	9311	LOC_Os12g23280
1.17847e-05	0.236908	0.157	0.008	0.305248	9311	LOC_Os12g08060
1.17847e-05	0.226166	0.157	0.008	0.305248	9311	LOC_Os10g20250
1.21103e-05	0.291219	0.14	0	0.31368	9311	LOC_Os02g57354
1.21103e-05	0.275293	0.14	0	0.31368	9311	EVM018052
1.21103e-05	0.258624	0.14	0	0.31368	9311	LOC_Os01g73960
1.21103e-05	0.224818	0.14	0	0.31368	9311	LOC_Os12g34012
1.21103e-05	0.220844	0.14	0	0.31368	9311	LOC_Os02g57919
1.21103e-05	0.216153	0.14	0	0.31368	9311	LOC_Os03g45299
1.21103e-05	0.211783	0.14	0	0.31368	9311	LOC_Os06g36719
1.21103e-05	0.209777	0.14	0	0.31368	9311	EVM014268
1.27215e-05	0.378688	0.919	0.819	0.329513	9311	LOC_Os02g50240
1.27577e-05	0.349033	0.773	0.63	0.33045	9311	LOC_Os06g03486
1.29481e-05	0.278056	0.203	0.031	0.335382	9311	LOC_Os04g55840
1.29995e-05	0.294938	0.157	0.008	0.336713	9311	LOC_Os02g09530
1.32861e-05	0.267285	0.198	0.031	0.344137	9311	LOC_Os03g53660
1.36876e-05	0.379484	0.558	0.362	0.354536	9311	LOC_Os05g11720
1.39946e-05	0.419598	0.419	0.205	0.362488	9311	LOC_Os09g29170
1.41069e-05	0.320731	0.948	0.85	0.365397	9311	LOC_Os05g48760
1.43476e-05	0.323121	0.924	0.827	0.37163	9311	LOC_Os03g51650
1.48058e-05	0.294819	0.919	0.882	0.383499	9311	LOC_Os03g09210
1.48071e-05	0.551576	0.32	0.118	0.383532	9311	LOC_Os11g38710
1.52104e-05	0.358817	0.395	0.181	0.39398	9311	LOC_Os03g01810
1.52625e-05	0.287511	0.988	0.969	0.39533	9311	LOC_Os01g44120
1.53577e-05	0.233225	0.994	0.992	0.397796	9311	LOC_Os08g06430
1.6323e-05	0.290981	0.209	0.039	0.422799	9311	LOC_Os06g50870
1.68005e-05	0.269968	0.186	0.024	0.435166	9311	LOC_Os07g01400
1.70025e-05	0.369198	0.221	0.047	0.440399	9311	LOC_Os07g48830
1.75748e-05	0.219502	0.151	0.008	0.455222	9311	LOC_Os02g05700
1.75808e-05	0.364629	0.326	0.126	0.455377	9311	LOC_Os07g22840
1.76997e-05	0.38087	0.581	0.378	0.458458	9311	LOC_Os01g63060
1.88265e-05	0.356137	0.343	0.134	0.487644	9311	LOC_Os01g69980
1.9023e-05	0.252948	0.134	0	0.492733	9311	LOC_Os06g48839
1.9023e-05	0.237249	0.134	0	0.492733	9311	LOC_Os09g28570
1.9023e-05	0.214413	0.134	0	0.492733	9311	LOC_Os07g07029
1.9023e-05	0.212285	0.134	0	0.492733	9311	LOC_Os04g36246
1.9023e-05	0.21111	0.134	0	0.492733	9311	LOC_Os01g24440
1.9023e-05	0.209861	0.134	0	0.492733	9311	LOC_Os07g35180
1.9023e-05	0.207222	0.134	0	0.492733	9311	LOC_Os11g40780
1.91199e-05	0.373345	0.82	0.756	0.495244	9311	LOC_Os06g50230
1.9403e-05	0.378439	0.279	0.087	0.502575	9311	LOC_Os07g43970
1.95514e-05	0.398858	0.419	0.189	0.506421	9311	LOC_Os11g04350
1.96203e-05	0.311276	0.151	0.008	0.508206	9311	LOC_Os02g36350
1.96768e-05	0.281028	0.901	0.74	0.509668	9311	LOC_Os03g57340
1.97481e-05	0.474221	0.32	0.118	0.511516	9311	LOC_Os01g04050
2.07634e-05	0.267197	0.994	0.969	0.537813	9311	LOC_Os03g20370
2.07647e-05	0.242614	0.244	0.055	0.537846	9311	LOC_Os02g13330
2.24599e-05	0.265665	1	1	0.581757	9311	LOC_Os08g10480
2.31832e-05	0.641954	0.378	0.181	0.60049	9311	LOC_Os01g26664
2.36291e-05	0.264256	0.192	0.031	0.61204	9311	LOC_Os09g39200
2.39348e-05	0.551242	0.64	0.402	0.619959	9311	LOC_Os12g36880
2.41728e-05	0.322302	0.808	0.685	0.626124	9311	LOC_Os03g58130
2.44261e-05	0.449304	0.477	0.283	0.632684	9311	LOC_Os06g47200
2.465e-05	0.514605	0.529	0.323	0.638485	9311	LOC_Os03g57640
2.47575e-05	0.348514	0.244	0.063	0.641268	9311	LOC_Os09g20880
2.51106e-05	0.467847	0.407	0.189	0.650415	9311	LOC_Os01g11910
2.51193e-05	0.405312	0.297	0.094	0.650641	9311	LOC_Os05g33310
2.53283e-05	0.253237	1	0.992	0.656053	9311	LOC_Os04g57220
2.65878e-05	0.282499	0.163	0.016	0.688676	9311	LOC_Os04g34030
2.68943e-05	0.260431	0.163	0.016	0.696615	9311	LOC_Os12g38810
2.73605e-05	0.271438	0.192	0.031	0.708693	9311	LOC_Os07g42924
2.7807e-05	0.280847	0.145	0.008	0.720256	9311	LOC_Os02g57720
2.85474e-05	0.400742	0.558	0.378	0.739435	9311	LOC_Os01g33000
2.89919e-05	0.414404	0.599	0.441	0.750948	9311	LOC_Os06g06980
2.91964e-05	0.224835	0.145	0.008	0.756245	9311	LOC_Os01g03820
2.943e-05	0.470922	0.599	0.433	0.762296	9311	LOC_Os12g43580
2.95312e-05	0.251474	0.233	0.055	0.764917	9311	LOC_Os04g38610
2.98193e-05	0.260341	0.128	0	0.772379	9311	LOC_Os09g32489
2.98193e-05	0.212605	0.128	0	0.772379	9311	LOC_Os02g01360
2.98193e-05	0.210943	0.128	0	0.772379	9311	LOC_Os10g04120
2.98193e-05	0.202476	0.128	0	0.772379	9311	LOC_Os06g09180
2.98405e-05	0.314766	0.983	0.961	0.77293	9311	LOC_Os09g30300
3.07244e-05	0.389424	0.174	0.024	0.795824	9311	LOC_Os03g40130
3.21126e-05	0.270313	0.215	0.047	0.831779	9311	LOC_Os03g02160
3.39106e-05	0.523688	0.523	0.323	0.878352	9311	LOC_Os04g58190
3.5744e-05	0.200402	0.163	0.016	0.92584	9311	LOC_Os04g57390
3.76355e-05	0.325814	0.233	0.063	0.974834	9311	LOC_Os03g11900
3.82884e-05	0.332891	0.302	0.11	0.991746	9311	LOC_Os08g06110
3.90041e-05	0.255825	0.174	0.024	1	9311	LOC_Os03g05160
3.90436e-05	0.281117	0.233	0.063	1	9311	LOC_Os09g06230
3.95325e-05	0.28106	0.355	0.142	1	9311	LOC_Os01g27940
4.06565e-05	0.406455	0.558	0.362	1	9311	LOC_Os08g37050
4.06772e-05	0.411747	0.988	0.992	1	9311	LOC_Os02g48720
4.27001e-05	0.323365	0.453	0.244	1	9311	LOC_Os03g05260
4.40232e-05	0.539153	0.529	0.362	1	9311	LOC_Os01g09830
4.47655e-05	0.432927	0.895	0.843	1	9311	LOC_Os08g31850
4.56322e-05	0.425	0.599	0.394	1	9311	LOC_Os01g54340
4.58039e-05	0.252963	0.186	0.031	1	9311	LOC_Os03g63490
4.5838e-05	0.241386	0.215	0.047	1	9311	LOC_Os02g55840
4.62088e-05	0.249269	0.169	0.024	1	9311	LOC_Os02g28980
4.66495e-05	0.224634	0.122	0	1	9311	LOC_Os09g03204
4.66495e-05	0.206697	0.122	0	1	9311	LOC_Os06g46714
4.72388e-05	0.248319	0.186	0.031	1	9311	LOC_Os03g15680
4.88411e-05	0.353413	0.453	0.26	1	9311	LOC_Os02g10720
4.93844e-05	0.30336	0.802	0.732	1	9311	LOC_Os01g40650
4.96067e-05	0.30538	0.262	0.079	1	9311	LOC_Os05g10840
5.0345e-05	0.374765	0.884	0.835	1	9311	LOC_Os01g57730
5.10527e-05	0.338486	0.471	0.276	1	9311	LOC_Os05g07070
5.25699e-05	0.288785	0.942	0.929	1	9311	LOC_Os03g04410
5.34537e-05	1.0501	0.366	0.173	1	9311	LOC_Os10g40460
5.4388e-05	0.839754	0.459	0.244	1	9311	LOC_Os11g30910
5.60997e-05	0.328929	0.285	0.094	1	9311	LOC_Os01g45900
5.61446e-05	0.309863	0.267	0.087	1	9311	LOC_Os03g25600
5.63319e-05	0.284372	0.878	0.764	1	9311	LOC_Os11g36340
5.68755e-05	0.392031	0.326	0.142	1	9311	LOC_Os02g36330
5.88415e-05	0.304983	0.151	0.016	1	9311	LOC_Os02g13660
5.91008e-05	0.354344	0.628	0.472	1	9311	LOC_Os02g32030
6.19788e-05	0.310777	0.314	0.126	1	9311	LOC_Os11g02150
6.27742e-05	0.288159	0.977	0.976	1	9311	LOC_Os05g04510
6.36856e-05	0.307236	0.267	0.094	1	9311	LOC_Os03g07300
6.45808e-05	0.306008	0.262	0.087	1	9311	LOC_Os02g53110
6.46045e-05	0.431979	0.331	0.15	1	9311	LOC_Os05g19970
6.46613e-05	0.24876	0.279	0.087	1	9311	LOC_Os03g29910
6.51654e-05	0.440203	0.762	0.685	1	9311	LOC_Os06g35770
6.55727e-05	0.418201	0.523	0.323	1	9311	LOC_Os01g22900
6.59096e-05	0.349549	0.506	0.339	1	9311	LOC_Os02g38840
6.79134e-05	0.314777	0.692	0.52	1	9311	LOC_Os06g10520
6.81669e-05	0.300912	0.378	0.173	1	9311	LOC_Os08g07760
6.81824e-05	0.352494	0.326	0.142	1	9311	LOC_Os02g09650
6.87561e-05	0.352843	0.558	0.378	1	9311	LOC_Os06g50030
6.88976e-05	0.239725	0.18	0.031	1	9311	LOC_Os02g50300
6.93723e-05	0.276008	0.25	0.079	1	9311	LOC_Os01g62840
6.97173e-05	0.242976	0.151	0.016	1	9311	LOC_Os03g04110
6.99734e-05	0.360558	0.134	0.008	1	9311	LOC_Os11g10590
7.05062e-05	0.24219	0.151	0.016	1	9311	LOC_Os06g39900
7.0823e-05	0.20966	0.134	0.008	1	9311	LOC_Os03g57680
7.28401e-05	0.264943	0.116	0	1	9311	LOC_Os04g51480
7.28401e-05	0.208674	0.116	0	1	9311	LOC_Os12g40529
7.34305e-05	0.201653	0.134	0.008	1	9311	LOC_Os09g34280
7.40414e-05	0.413126	0.384	0.181	1	9311	LOC_Os03g13870
7.97518e-05	0.377751	0.378	0.205	1	9311	LOC_Os03g17000
8.14682e-05	0.386347	0.721	0.614	1	9311	LOC_Os12g32580
8.3116e-05	0.410872	0.459	0.268	1	9311	LOC_Os01g58620
8.3603e-05	0.397125	0.541	0.354	1	9311	LOC_Os07g38360
8.50131e-05	0.402415	0.698	0.583	1	9311	LOC_Os06g45060
8.60195e-05	0.49021	0.57	0.409	1	9311	LOC_Os01g41430
8.62825e-05	0.462735	0.68	0.496	1	9311	LOC_Os11g01530
8.64376e-05	0.737625	0.279	0.102	1	9311	LOC_Os03g17870
8.76347e-05	0.331128	0.233	0.063	1	9311	LOC_Os01g43750
8.77033e-05	0.244289	0.163	0.024	1	9311	LOC_Os12g04020
8.83301e-05	0.254155	0.669	0.433	1	9311	LOC_Os06g45430
9.54603e-05	0.261993	0.163	0.024	1	9311	LOC_Os01g07870
9.60816e-05	0.282279	0.61	0.48	1	9311	LOC_Os04g38525
9.73272e-05	0.231307	0.285	0.102	1	9311	LOC_Os10g30090
9.88728e-05	0.233262	0.285	0.102	1	9311	LOC_Os07g38840
9.95013e-05	0.351639	0.36	0.173	1	9311	LOC_Os04g45940
0.000100064	0.667858	0.599	0.457	1	9311	LOC_Os01g16140
0.000102366	0.291718	0.233	0.071	1	9311	LOC_Os01g55340
0.000105394	0.630446	0.273	0.102	1	9311	LOC_Os01g16714
0.000107882	0.339331	0.262	0.087	1	9311	LOC_Os02g53750
0.000108265	0.591905	0.267	0.094	1	9311	LOC_Os02g51930
0.000108648	0.239287	0.128	0.008	1	9311	LOC_Os09g27030
0.000109253	0.372093	0.424	0.244	1	9311	LOC_Os01g51200
0.00011066	0.331224	0.669	0.504	1	9311	LOC_Os05g51390
0.000111243	0.391754	0.669	0.543	1	9311	LOC_Os01g48420
0.000111288	0.209544	0.128	0.008	1	9311	LOC_Os10g33450
0.000111792	0.228449	0.157	0.024	1	9311	LOC_Os09g32240
0.000113531	0.268171	0.11	0	1	9311	LOC_Os06g35564
0.000113531	0.218622	0.11	0	1	9311	LOC_Os03g02771
0.000113531	0.211744	0.11	0	1	9311	LOC_Os03g27446
0.000113531	0.21145	0.11	0	1	9311	LOC_Os09g38837
0.000113531	0.210205	0.11	0	1	9311	LOC_Os04g39994
0.000113531	0.208409	0.11	0	1	9311	LOC_Os11g02686
0.000113531	0.200642	0.11	0	1	9311	LOC_Os02g56760
0.00011647	0.240681	0.227	0.063	1	9311	LOC_Os04g37820
0.000120098	0.204316	0.145	0.016	1	9311	LOC_Os02g55030
0.000120104	0.259909	0.198	0.047	1	9311	LOC_Os04g32590
0.000120527	0.322091	0.43	0.244	1	9311	LOC_Os08g41100
0.000121252	0.320055	0.599	0.417	1	9311	LOC_Os03g61130
0.000121452	0.336321	0.977	0.953	1	9311	LOC_Os04g56160
0.000122468	0.266466	0.128	0.008	1	9311	LOC_Os01g63190
0.000122848	0.50642	0.785	0.701	1	9311	LOC_Os02g41860
0.000124856	0.254915	0.302	0.118	1	9311	LOC_Os06g40190
0.000127178	0.44876	0.401	0.22	1	9311	LOC_Os01g72020
0.00012743	0.333116	0.523	0.346	1	9311	LOC_Os06g03640
0.000130921	0.401379	0.419	0.22	1	9311	LOC_Os01g47270
0.000133107	0.399736	0.599	0.417	1	9311	LOC_Os08g43620
0.000133831	0.346471	0.727	0.646	1	9311	LOC_Os01g50160
0.000136105	0.312312	0.872	0.795	1	9311	LOC_Os03g21030
0.000136421	0.337453	0.442	0.26	1	9311	LOC_Os02g51414
0.000136453	0.318155	0.227	0.071	1	9311	LOC_Os05g38250
0.000138161	0.202956	0.174	0.031	1	9311	LOC_Os09g34340
0.000146219	0.389606	0.407	0.22	1	9311	LOC_Os04g47180
0.000147617	0.371129	0.43	0.236	1	9311	LOC_Os09g39940
0.000153339	0.227798	0.988	0.984	1	9311	LOC_Os11g06890
0.000155462	0.369383	0.547	0.394	1	9311	LOC_Os09g32080
0.000156454	0.256139	0.192	0.047	1	9311	LOC_Os03g62250
0.000158169	0.298999	0.291	0.118	1	9311	LOC_Os08g35620
0.000160603	0.419595	0.337	0.157	1	9311	LOC_Os04g41540
0.00016306	0.280522	0.285	0.118	1	9311	LOC_Os05g48280
0.000163296	0.372636	0.308	0.134	1	9311	LOC_Os02g53420
0.000163346	0.21847	0.14	0.016	1	9311	LOC_Os01g56560
0.000166423	0.269833	0.395	0.213	1	9311	LOC_Os01g52460
0.000168632	0.253062	0.203	0.055	1	9311	LOC_Os06g40060
0.000170389	0.233059	0.122	0.008	1	9311	LOC_Os07g38290
0.000172436	0.214915	0.122	0.008	1	9311	LOC_Os05g22940
0.000176655	0.298975	0.105	0	1	9311	LOC_Os01g27609
0.00017974	0.21343	0.192	0.047	1	9311	LOC_Os07g42300
0.000183619	0.257521	0.279	0.11	1	9311	LOC_Os08g06480
0.000190311	0.360244	0.541	0.378	1	9311	LOC_Os06g47700
0.000190489	0.243708	0.18	0.039	1	9311	LOC_Os03g17940
0.000194562	0.325932	0.483	0.323	1	9311	LOC_Os08g31830
0.000198421	0.28823	0.25	0.094	1	9311	LOC_Os11g05930
0.000199747	0.235989	0.18	0.039	1	9311	LOC_Os08g32610
0.000200771	0.333954	0.442	0.252	1	9311	LOC_Os09g38070
0.000203567	0.285038	0.18	0.039	1	9311	LOC_Os02g30100
0.000203567	0.216043	0.18	0.039	1	9311	LOC_Os05g04850
0.000204155	0.384491	0.459	0.276	1	9311	LOC_Os01g72360
0.000208262	0.30892	0.762	0.567	1	9311	LOC_Os02g46220
0.00020879	0.233278	0.203	0.055	1	9311	LOC_Os04g53680
0.000210245	0.323999	0.802	0.764	1	9311	LOC_Os11g47760
0.000210991	0.417852	0.663	0.535	1	9311	LOC_Os05g44770
0.000212154	0.206835	0.169	0.031	1	9311	LOC_Os03g04890
0.000212223	0.627053	0.692	0.598	1	9311	LOC_Os03g19990
0.000222599	0.28112	0.965	0.913	1	9311	LOC_Os01g66120
0.00022489	0.336921	0.378	0.205	1	9311	LOC_Os11g41990
0.000225863	0.22442	0.151	0.024	1	9311	LOC_Os09g31360
0.000242098	0.383306	0.297	0.126	1	9311	LOC_Os11g09280
0.000244397	0.338915	0.326	0.157	1	9311	LOC_Os05g28290
0.000246936	0.32094	0.337	0.157	1	9311	LOC_Os08g06640
0.000252058	0.343336	0.331	0.165	1	9311	LOC_Os08g35470
0.000253773	0.25452	0.279	0.11	1	9311	LOC_Os12g15520
0.000259769	0.352309	0.599	0.465	1	9311	LOC_Os05g45950
0.000261413	0.314412	0.25	0.087	1	9311	LOC_Os02g51780
0.000263061	0.285604	0.174	0.039	1	9311	LOC_Os12g40260
0.000270649	0.259633	0.262	0.102	1	9311	LOC_Os11g04880
0.000270715	0.297984	0.413	0.228	1	9311	LOC_Os03g63040
0.000276341	0.20426	0.116	0.008	1	9311	LOC_Os02g49150
0.000281379	0.232444	0.145	0.024	1	9311	LOC_Os09g36950
0.000294595	0.383852	0.355	0.189	1	9311	LOC_Os11g37230
0.00029502	0.259193	0.256	0.094	1	9311	LOC_Os05g41110
0.000300666	0.236872	0.291	0.118	1	9311	LOC_Os05g44290
0.00030154	0.368386	0.61	0.441	1	9311	LOC_Os10g30450
0.000305221	0.346039	0.837	0.74	1	9311	LOC_Os09g20350
0.000312857	0.413654	0.349	0.173	1	9311	LOC_Os01g51310
0.000314094	0.373021	0.663	0.488	1	9311	LOC_Os09g16380
0.000316608	0.293686	0.895	0.858	1	9311	LOC_Os08g06140
0.00031892	0.332364	0.198	0.055	1	9311	LOC_Os09g36790
0.000319799	0.420134	0.657	0.543	1	9311	LOC_Os01g58220
0.000322742	0.308037	0.297	0.126	1	9311	LOC_Os03g50340
0.000325255	0.283291	0.349	0.181	1	9311	LOC_Os02g53060
0.000345156	0.363232	0.314	0.15	1	9311	LOC_Os02g40810
0.000350467	0.280493	0.25	0.094	1	9311	LOC_Os07g45100
0.000354703	0.297233	0.715	0.583	1	9311	LOC_Os02g21890
0.000357909	0.434993	0.564	0.457	1	9311	LOC_Os11g08210
0.000368806	0.330212	0.471	0.307	1	9311	LOC_Os08g21350
0.00037429	0.266501	0.262	0.102	1	9311	LOC_Os02g54150
0.000377681	0.312548	0.762	0.669	1	9311	LOC_Os03g57460
0.000380114	0.30644	0.587	0.449	1	9311	LOC_Os03g59710
0.000385231	0.478535	0.488	0.299	1	9311	LOC_Os01g72009
0.000385298	0.293436	0.692	0.535	1	9311	LOC_Os02g27030
0.000386026	0.257447	0.238	0.087	1	9311	LOC_Os04g36050
0.00040512	0.320925	0.18	0.047	1	9311	LOC_Os01g18950
0.000416575	0.221103	0.11	0.008	1	9311	LOC_Os03g07370
0.000422221	0.267177	0.233	0.079	1	9311	LOC_Os09g34110
0.000424746	0.339943	0.308	0.142	1	9311	LOC_Os12g37560
0.000431656	0.263798	0.267	0.11	1	9311	LOC_Os02g08350
0.000434896	0.206436	0.14	0.024	1	9311	LOC_Os06g50154
0.000439035	0.241599	0.18	0.047	1	9311	LOC_Os12g38910
0.000443431	0.315294	0.797	0.677	1	9311	LOC_Os01g58580
0.000459624	0.217598	0.198	0.055	1	9311	LOC_Os07g44090
0.000465423	0.377064	0.657	0.583	1	9311	LOC_Os09g30360
0.000466664	0.280701	0.506	0.323	1	9311	LOC_Os03g58840
0.000471334	0.325428	0.715	0.614	1	9311	LOC_Os06g02540
0.00048161	0.278233	0.349	0.173	1	9311	LOC_Os10g05130
0.000489717	0.369295	0.384	0.213	1	9311	LOC_Os06g06180
0.000493742	0.291519	0.215	0.071	1	9311	LOC_Os04g01140
0.000524858	0.328539	0.692	0.551	1	9311	LOC_Os03g53930
0.000535729	0.327764	0.436	0.268	1	9311	LOC_Os01g46080
0.000552065	0.280047	0.814	0.717	1	9311	LOC_Os09g26400
0.00055267	0.359448	0.669	0.559	1	9311	LOC_Os02g53870
0.000575334	0.230067	0.151	0.031	1	9311	LOC_Os01g05060
0.000587315	0.366346	0.529	0.37	1	9311	LOC_Os05g38830
0.000593867	0.263183	0.82	0.74	1	9311	LOC_Os01g67850
0.000599115	0.288282	0.721	0.654	1	9311	LOC_Os07g46990
0.000599189	0.329746	0.36	0.205	1	9311	LOC_Os12g01390
0.000612864	0.244687	0.227	0.087	1	9311	LOC_Os05g24020
0.00061513	0.203426	0.174	0.047	1	9311	LOC_Os05g33810
0.000633635	0.337376	0.442	0.283	1	9311	LOC_Os07g47530
0.000643513	0.317246	0.343	0.189	1	9311	LOC_Os01g52610
0.000645116	0.326652	0.337	0.173	1	9311	LOC_Os10g32920
0.000654028	0.25685	0.959	0.961	1	9311	LOC_Os05g27730
0.00065527	0.335143	0.61	0.504	1	9311	LOC_Os07g22720
0.00066828	0.384737	0.831	0.74	1	9311	LOC_Os02g44940
0.000672032	0.396065	0.401	0.252	1	9311	LOC_Os02g31290
0.000688717	0.374514	0.802	0.717	1	9311	LOC_Os07g32570
0.00069409	0.225955	0.18	0.055	1	9311	LOC_Os02g58340
0.000719246	0.31999	0.227	0.087	1	9311	LOC_Os02g36880
0.000728754	0.275921	0.145	0.031	1	9311	LOC_Os11g05614
0.000735491	0.288129	0.279	0.126	1	9311	LOC_Os10g19970
0.00075226	0.200374	0.174	0.047	1	9311	LOC_Os01g13660
0.000754761	0.398338	0.657	0.606	1	9311	LOC_Os02g41820
0.000759875	0.202651	0.163	0.039	1	9311	LOC_Os03g58170
0.000762227	0.263431	0.576	0.441	1	9311	LOC_Os01g16640
0.000795334	0.320677	0.721	0.622	1	9311	LOC_Os05g38860
0.000807382	0.252408	0.157	0.039	1	9311	LOC_Os04g50770
0.00081476	0.259743	0.413	0.236	1	9311	LOC_Os12g35260
0.000818385	0.273107	0.814	0.787	1	9311	LOC_Os07g44790
0.00082037	0.306079	0.256	0.11	1	9311	LOC_Os03g58430
0.000821324	0.307558	0.529	0.378	1	9311	LOC_Os08g01850
0.000859554	0.250169	0.448	0.268	1	9311	LOC_Os02g40820
0.000865603	0.22437	1	1	1	9311	LOC_Os12g07140
0.000868147	0.292107	0.401	0.236	1	9311	LOC_Os02g21880
0.000879074	0.295586	0.372	0.22	1	9311	LOC_Os05g41510
0.000904705	0.306306	0.622	0.543	1	9311	LOC_Os08g44430
0.000906104	0.256001	0.215	0.071	1	9311	LOC_Os08g39300
0.000926282	0.301336	0.43	0.268	1	9311	LOC_Os08g19210
0.000950115	0.209914	0.116	0.016	1	9311	LOC_Os03g38590
0.000950342	0.337747	0.529	0.37	1	9311	LOC_Os10g30054
0.000951443	0.380377	0.68	0.528	1	9311	LOC_Os12g09640
0.000968491	0.259797	0.25	0.102	1	9311	LOC_Os09g25330
0.000973396	0.250368	0.36	0.189	1	9311	LOC_Os11g43970
0.000973889	0.237022	0.174	0.047	1	9311	LOC_Os02g15290
0.000977825	0.224108	0.145	0.031	1	9311	LOC_Os01g12650
0.000989482	0.322519	0.517	0.362	1	9311	LOC_Os02g48000
0.00100448	0.491431	0.948	0.937	1	9311	LOC_Os01g56420
0.0010054	0.233658	0.18	0.055	1	9311	LOC_Os01g59160
0.00100635	0.224971	0.843	0.74	1	9311	LOC_Os03g27290
0.00100924	0.326083	0.419	0.26	1	9311	LOC_Os12g02030
0.00101847	0.2936	0.477	0.339	1	9311	LOC_Os06g14420
0.00102022	0.273597	0.401	0.244	1	9311	LOC_Os03g25750
0.00104548	0.38285	0.494	0.386	1	9311	LOC_Os09g35630
0.00104869	0.213398	0.169	0.047	1	9311	LOC_Os07g28820
0.00105177	0.257641	0.843	0.787	1	9311	LOC_Os01g41610
0.00106411	0.221746	0.238	0.094	1	9311	LOC_Os02g04010
0.00108124	0.20748	0.128	0.024	1	9311	LOC_Os05g43460
0.00111305	0.325485	0.424	0.26	1	9311	LOC_Os12g24080
0.00111522	0.27189	0.337	0.165	1	9311	LOC_Os01g02200
0.00112444	0.346702	0.483	0.339	1	9311	LOC_Os03g24450
0.00114726	0.227579	0.14	0.031	1	9311	LOC_Os02g46650
0.00114901	0.21078	0.186	0.063	1	9311	LOC_Os03g04470
0.00115382	0.219721	0.506	0.323	1	9311	LOC_Os10g37420
0.00116516	0.246566	0.709	0.52	1	9311	LOC_Os10g39640
0.00121295	0.283574	0.297	0.157	1	9311	LOC_Os03g15590
0.00121381	0.292253	0.14	0.031	1	9311	LOC_Os10g39110
0.00122394	0.254634	0.599	0.465	1	9311	LOC_Os02g51750
0.0012315	0.362676	0.349	0.197	1	9311	LOC_Os07g02460
0.00123727	0.319902	0.5	0.354	1	9311	LOC_Os12g27520
0.00123847	0.351454	0.576	0.449	1	9311	LOC_Os09g36940
0.00126702	0.220918	0.244	0.102	1	9311	LOC_Os01g56780
0.00126884	0.31802	0.785	0.787	1	9311	LOC_Os10g33800
0.00127775	0.376179	0.698	0.606	1	9311	LOC_Os09g16760
0.00129893	0.293478	0.744	0.63	1	9311	LOC_Os01g16960
0.00131155	0.277141	0.273	0.126	1	9311	LOC_Os04g51890
0.00134091	0.26941	0.326	0.165	1	9311	LOC_Os04g38970
0.00134145	0.22089	0.267	0.118	1	9311	LOC_Os03g13860
0.0013514	0.264251	0.436	0.268	1	9311	LOC_Os01g56580
0.00135649	0.305551	0.297	0.15	1	9311	LOC_Os01g11750
0.00135775	0.213721	0.14	0.031	1	9311	LOC_Os03g26210
0.00135862	0.282502	0.372	0.213	1	9311	LOC_Os03g51430
0.00136145	0.299377	0.541	0.417	1	9311	LOC_Os02g09960
0.00137043	0.211069	0.14	0.031	1	9311	LOC_Os06g50880
0.00137059	0.211111	0.203	0.071	1	9311	LOC_Os12g43350
0.00138366	0.359694	0.703	0.591	1	9311	LOC_Os01g71830
0.00140792	0.28091	0.384	0.22	1	9311	LOC_Os02g05710
0.00141334	0.318421	0.5	0.37	1	9311	LOC_Os01g59130
0.00142968	0.335296	0.605	0.449	1	9311	LOC_Os01g57470
0.00143575	0.32852	0.576	0.465	1	9311	LOC_Os02g32490
0.00145757	0.302919	0.855	0.787	1	9311	LOC_Os04g41160
0.00148159	0.418492	0.605	0.48	1	9311	LOC_Os04g46810
0.00151276	0.220738	0.203	0.071	1	9311	LOC_Os12g29580
0.00157442	0.275877	0.448	0.307	1	9311	LOC_Os02g08540
0.00157714	0.284801	0.151	0.039	1	9311	LOC_Os05g27580
0.00161768	0.387173	0.535	0.378	1	9311	LOC_Os02g33780
0.00162017	0.281802	0.465	0.315	1	9311	LOC_Os01g55050
0.0016225	0.201001	0.157	0.047	1	9311	LOC_Os07g05700
0.00162644	0.418778	0.797	0.748	1	9311	LOC_Os03g09940
0.00162784	0.288801	0.849	0.811	1	9311	LOC_Os01g62190
0.00164211	0.207298	0.186	0.063	1	9311	LOC_Os03g08390
0.00165066	0.318895	0.378	0.236	1	9311	LOC_Os08g33210
0.00168136	0.33724	0.32	0.181	1	9311	LOC_Os06g30500
0.00170753	0.209805	0.186	0.063	1	9311	LOC_Os01g02334
0.00172292	0.306271	0.424	0.268	1	9311	LOC_Os01g62760
0.00173112	0.314814	0.453	0.299	1	9311	LOC_Os04g50120
0.00173432	0.235257	0.198	0.071	1	9311	LOC_Os12g07160
0.0017434	0.279423	0.61	0.52	1	9311	LOC_Os01g09320
0.00175495	0.259813	0.488	0.339	1	9311	LOC_Os09g25770
0.00175498	0.312375	0.395	0.244	1	9311	LOC_Os07g38570
0.00176483	0.258963	0.262	0.126	1	9311	LOC_Os04g10400
0.00179423	0.362974	0.337	0.189	1	9311	LOC_Os05g39054
0.00180063	0.236944	0.192	0.071	1	9311	LOC_Os08g44260
0.00182595	0.236175	0.233	0.094	1	9311	LOC_Os10g34710
0.00182868	0.340365	0.523	0.394	1	9311	LOC_Os01g51220
0.00183467	0.229659	0.215	0.087	1	9311	LOC_Os04g30890
0.00185939	0.252575	0.349	0.205	1	9311	LOC_Os08g42268
0.00187693	0.237051	0.273	0.126	1	9311	LOC_Os02g03020
0.00189837	0.271331	0.552	0.409	1	9311	LOC_Os02g35200
0.00195833	0.270467	0.558	0.441	1	9311	LOC_Os01g27150
0.00198155	0.299177	0.547	0.394	1	9311	LOC_Os09g15770
0.00201434	0.229677	0.355	0.197	1	9311	LOC_Os04g38310
0.00201982	0.220596	0.227	0.094	1	9311	LOC_Os06g09660
0.00206303	0.321512	0.744	0.63	1	9311	LOC_Os05g02140
0.00207302	0.329678	0.599	0.48	1	9311	LOC_Os09g32510
0.00207371	0.21447	0.674	0.535	1	9311	LOC_Os11g07670
0.0021078	0.202378	0.791	0.709	1	9311	LOC_Os10g39120
0.00210812	0.264862	0.349	0.205	1	9311	LOC_Os05g25210
0.00215959	0.241594	0.36	0.205	1	9311	LOC_Os07g23570
0.00216431	0.324459	0.43	0.291	1	9311	LOC_Os08g44510
0.0021838	0.215621	0.785	0.764	1	9311	LOC_Os03g03130
0.00223303	0.342547	0.326	0.181	1	9311	LOC_Os02g03294
0.00229438	0.356093	0.901	0.921	1	9311	LOC_Os08g06100
0.00234525	0.256301	0.262	0.126	1	9311	LOC_Os05g08640
0.00236631	0.296313	0.273	0.142	1	9311	LOC_Os08g34720
0.00239391	0.342962	0.773	0.732	1	9311	LOC_Os03g56810
0.00240851	0.207153	0.169	0.055	1	9311	LOC_Os03g04920
0.00242591	0.229683	0.203	0.079	1	9311	LOC_Os04g31290
0.002483	0.232425	0.866	0.787	1	9311	LOC_Os01g09080
0.00255372	0.211978	0.105	0.016	1	9311	LOC_Os03g18490
0.00257218	0.282082	0.215	0.094	1	9311	LOC_Os06g31090
0.00258614	0.221665	0.174	0.063	1	9311	LOC_Os01g52050
0.00259617	0.312715	0.773	0.732	1	9311	LOC_Os07g26520
0.00261493	0.227316	0.198	0.079	1	9311	LOC_Os02g18320
0.00261889	0.322512	0.628	0.535	1	9311	LOC_Os03g50870
0.00266248	0.208506	0.186	0.071	1	9311	LOC_Os04g33780
0.00269675	0.236712	0.448	0.283	1	9311	LOC_Os04g57550
0.00273414	0.217858	0.087	0.008	1	9311	LOC_Os04g28320
0.00274919	0.257576	0.401	0.268	1	9311	LOC_Os03g22820
0.00275314	0.398876	0.314	0.181	1	9311	LOC_Os02g01890
0.00275537	0.262675	0.634	0.559	1	9311	LOC_Os03g57890
0.00275653	0.34461	0.471	0.354	1	9311	LOC_Os11g05660
0.00275864	0.223015	0.36	0.205	1	9311	LOC_Os06g01990
0.00275888	0.211666	0.622	0.433	1	9311	LOC_Os12g40840
0.0027664	0.254679	0.727	0.693	1	9311	LOC_Os02g37930
0.00287199	0.353203	0.244	0.118	1	9311	LOC_Os10g38940
0.00296249	0.207018	0.285	0.142	1	9311	LOC_Os08g06010
0.00297126	0.335013	0.366	0.22	1	9311	LOC_Os02g32450
0.00301045	0.20496	0.18	0.063	1	9311	LOC_Os03g24160
0.00308346	0.26422	0.273	0.142	1	9311	LOC_Os01g69920
0.0031211	0.218999	0.14	0.039	1	9311	LOC_Os06g34730
0.00319733	0.298926	0.372	0.236	1	9311	LOC_Os09g20650
0.00324091	0.234331	0.262	0.142	1	9311	LOC_Os03g49180
0.00326865	0.265253	0.855	0.78	1	9311	LOC_Os03g08330
0.00327913	0.304612	0.297	0.165	1	9311	LOC_Os07g40290
0.00328659	0.254026	0.331	0.189	1	9311	LOC_Os07g48820
0.00331657	0.251213	0.355	0.205	1	9311	LOC_Os08g41280
0.00331896	0.293277	0.285	0.15	1	9311	LOC_Os01g50310
0.00332052	0.206511	0.494	0.323	1	9311	LOC_Os05g33610
0.00334931	0.230784	0.558	0.417	1	9311	LOC_Os07g41280
0.00337658	0.240472	0.448	0.299	1	9311	LOC_Os08g35600
0.00341576	0.278168	0.587	0.496	1	9311	LOC_Os11g37890
0.00350258	0.217491	0.128	0.031	1	9311	LOC_Os01g06580
0.0035364	0.273453	0.483	0.339	1	9311	LOC_Os07g04220
0.00368954	0.404807	0.797	0.803	1	9311	LOC_Os03g06040
0.00370318	0.310667	0.186	0.071	1	9311	LOC_Os10g39680
0.00372894	0.249765	0.477	0.346	1	9311	LOC_Os03g17084
0.00388447	0.386163	0.32	0.197	1	9311	LOC_Os06g05430
0.00396191	0.247625	0.587	0.488	1	9311	LOC_Os01g48790
0.00397977	0.240039	0.221	0.102	1	9311	LOC_Os03g01910
0.0040263	0.260274	0.43	0.283	1	9311	LOC_Os10g41400
0.00407425	0.211581	0.145	0.047	1	9311	LOC_Os07g43070
0.00409385	0.213006	0.267	0.134	1	9311	LOC_Os01g60280
0.00409498	0.24368	0.308	0.173	1	9311	LOC_Os02g49950
0.00411141	0.289798	0.884	0.866	1	9311	LOC_Os05g06500
0.00420191	0.360559	0.791	0.787	1	9311	LOC_Os07g43290
0.00421565	0.282162	0.692	0.622	1	9311	LOC_Os12g32950
0.00421794	0.218249	0.75	0.614	1	9311	LOC_Os12g39400
0.00422353	0.213505	0.273	0.134	1	9311	LOC_Os05g26840
0.00424866	0.253765	0.297	0.165	1	9311	LOC_Os01g41010
0.00426452	0.244517	0.233	0.11	1	9311	LOC_Os08g42750
0.00428906	0.215989	0.314	0.173	1	9311	LOC_Os05g48855
0.00431036	0.282788	0.453	0.331	1	9311	LOC_Os03g21720
0.00432691	0.301778	0.756	0.748	1	9311	LOC_Os09g26900
0.00434657	0.234852	0.233	0.11	1	9311	LOC_Os06g15700
0.00439114	0.341132	0.407	0.291	1	9311	LOC_Os02g11820
0.00442917	0.270165	0.57	0.441	1	9311	LOC_Os05g38550
0.00443927	0.305896	0.529	0.409	1	9311	LOC_Os05g06350
0.00445819	0.241078	0.233	0.11	1	9311	LOC_Os01g10610
0.00451158	0.310101	0.244	0.126	1	9311	LOC_Os03g25760
0.00455406	0.281492	0.616	0.496	1	9311	LOC_Os06g44160
0.0045724	0.21489	0.233	0.11	1	9311	LOC_Os07g43990
0.00458617	0.271356	0.849	0.858	1	9311	LOC_Os05g35460
0.00460828	0.21652	0.203	0.087	1	9311	LOC_Os12g26030
0.00465383	0.282051	0.826	0.795	1	9311	LOC_Os02g04130
0.00476394	0.268156	0.517	0.362	1	9311	LOC_Os06g09540
0.00484066	0.291736	0.343	0.205	1	9311	LOC_Os05g45410
0.00491135	0.222721	0.471	0.323	1	9311	LOC_Os06g06120
0.00494388	0.253336	0.506	0.362	1	9311	LOC_Os11g31950
0.0050595	0.210844	0.186	0.079	1	9311	LOC_Os01g13770
0.00512205	0.299655	0.483	0.339	1	9311	LOC_Os02g39620
0.00516061	0.227164	0.349	0.22	1	9311	LOC_Os02g55080
0.00520403	0.238857	0.297	0.165	1	9311	LOC_Os05g46490
0.00522172	0.346734	0.221	0.102	1	9311	LOC_Os03g09970
0.00527616	0.231111	0.25	0.126	1	9311	LOC_Os05g37930
0.0054219	0.240901	0.32	0.189	1	9311	LOC_Os04g57700
0.00546254	0.236198	0.674	0.543	1	9311	LOC_Os09g28060
0.00552076	0.224208	0.826	0.748	1	9311	LOC_Os07g06680
0.00553599	0.273694	0.395	0.252	1	9311	LOC_Os07g46570
0.0055479	0.234488	0.64	0.559	1	9311	LOC_Os04g42910
0.0055582	0.341003	0.32	0.197	1	9311	LOC_Os05g44340
0.00557453	0.20019	0.337	0.205	1	9311	LOC_Os06g14406
0.00568979	0.252674	0.186	0.079	1	9311	LOC_Os05g48740
0.00574196	0.292229	0.401	0.268	1	9311	LOC_Os07g06600
0.00582365	0.204451	0.215	0.102	1	9311	LOC_Os01g70570
0.00587313	0.274265	0.477	0.362	1	9311	LOC_Os08g31560
0.00594121	0.226172	0.134	0.039	1	9311	LOC_Os01g72900
0.00600198	0.209497	0.128	0.039	1	9311	LOC_Os02g43900
0.006003	0.313715	0.302	0.165	1	9311	LOC_Os06g08080
0.00613598	0.27533	0.581	0.496	1	9311	LOC_Os02g19210
0.00621087	0.217396	0.25	0.134	1	9311	LOC_Os03g08270
0.00630543	0.489456	0.302	0.165	1	9311	LOC_Os04g50700
0.00633537	0.202239	0.116	0.031	1	9311	LOC_Os04g34440
0.00636231	0.202652	0.32	0.189	1	9311	LOC_Os01g43910
0.00640132	0.245784	0.337	0.213	1	9311	LOC_Os02g34680
0.00641902	0.225283	0.756	0.709	1	9311	LOC_Os02g46962
0.00669419	0.33411	0.442	0.354	1	9311	LOC_Os01g14110
0.00673782	0.206939	0.541	0.409	1	9311	LOC_Os07g05950
0.00679262	0.247462	0.727	0.63	1	9311	LOC_Os03g16800
0.00692157	0.322378	0.576	0.472	1	9311	LOC_Os06g42720
0.0069592	0.237394	0.459	0.339	1	9311	LOC_Os02g52780
0.00696829	0.223591	0.866	0.882	1	9311	LOC_Os05g39930
0.00700914	0.29449	0.302	0.173	1	9311	LOC_Os03g62060
0.00701222	0.403835	0.988	1	1	9311	LOC_Os11g47809
0.00714712	0.214854	0.721	0.606	1	9311	LOC_Os06g09890
0.00719466	0.268778	0.419	0.291	1	9311	LOC_Os02g39360
0.00726413	0.200174	0.308	0.181	1	9311	LOC_Os03g10500
0.00732544	0.225535	0.581	0.488	1	9311	LOC_Os07g10256
0.00749416	0.210374	0.285	0.165	1	9311	LOC_Os02g38220
0.00763614	0.220813	0.36	0.236	1	9311	LOC_Os01g09020
0.00774139	0.33114	0.483	0.362	1	9311	LOC_Os08g44440
0.00783046	0.205175	0.913	0.811	1	9311	LOC_Os04g57200
0.00790849	0.296948	0.529	0.433	1	9311	LOC_Os11g08100
0.00791796	0.207381	0.151	0.055	1	9311	LOC_Os05g33000
0.00794689	0.218293	0.198	0.094	1	9311	LOC_Os02g22020
0.00804561	0.286835	0.459	0.339	1	9311	LOC_Os02g43790
0.00805128	0.22204	0.826	0.748	1	9311	LOC_Os04g54830
0.00820061	0.273608	0.326	0.205	1	9311	LOC_Os06g39875
0.00834	0.225513	0.227	0.118	1	9311	LOC_Os01g47680
0.00841892	0.266204	0.157	0.063	1	9311	LOC_Os05g44060
0.00843666	0.224458	0.378	0.236	1	9311	LOC_Os02g32814
0.0084904	0.268103	0.413	0.307	1	9311	LOC_Os03g19500
0.00853068	0.365272	0.628	0.567	1	9311	LOC_Os01g62230
0.00859623	0.222403	0.384	0.26	1	9311	LOC_Os07g14280
0.00865014	0.271346	0.657	0.614	1	9311	LOC_Os08g37060
0.00868912	0.22089	0.395	0.26	1	9311	LOC_Os02g12580
0.00873102	0.222741	0.203	0.102	1	9311	LOC_Os03g47800
0.00876068	0.242779	0.517	0.402	1	9311	LOC_Os01g72600
0.00890206	0.258725	0.227	0.118	1	9311	LOC_Os10g30530
0.0091972	0.274562	0.355	0.252	1	9311	LOC_Os04g31110
0.00930944	0.236284	0.459	0.331	1	9311	LOC_Os08g09180
0.00931915	0.209755	0.273	0.165	1	9311	LOC_Os02g37030
0.00939761	0.315081	0.483	0.362	1	9311	LOC_Os03g41390
0.00941631	0.253581	0.535	0.394	1	9311	LOC_Os01g39310
0.00949813	0.2038	0.157	0.063	1	9311	LOC_Os01g70500
0.0095338	0.206477	0.355	0.228	1	9311	LOC_Os09g26700
0.00957634	0.279972	0.68	0.622	1	9311	LOC_Os01g17050
0.00958761	0.344126	0.424	0.315	1	9311	LOC_Os10g14011
0.00964677	0.243554	0.238	0.126	1	9311	LOC_Os05g26820
0.0096891	0.221537	0.233	0.126	1	9311	LOC_Os03g56900
0.00986245	0.241313	0.57	0.504	1	9311	LOC_Os03g44450
0.00986998	0.204824	0.279	0.165	1	9311	LOC_Os03g55600
1.2722e-60	3.55157	1	0	3.29524e-56	Nip	EVM0012725
1.2722e-60	2.9894	1	0	3.29524e-56	Nip	LOC_Os11g11980
1.2722e-60	2.38516	1	0	3.29524e-56	Nip	LOC_Os01g54739
6.12589e-60	3.426	0.992	0	1.58673e-55	Nip	LOC_Os03g13140
6.12611e-60	3.45567	0.992	0	1.58679e-55	Nip	LOC_Os10g38495
6.12611e-60	2.8988	0.992	0	1.58679e-55	Nip	LOC_Os02g11859
2.97669e-57	1.72256	0.961	0	7.71022e-53	Nip	Add_EVM0009533
5.54038e-57	3.09992	0.961	0.006	1.43507e-52	Nip	LOC_Os11g10520
1.36311e-56	2.14478	0.953	0	3.53074e-52	Nip	LOC_Os09g10274
1.36311e-56	1.90519	0.953	0	3.53074e-52	Nip	LOC_Os01g60410
6.18052e-56	2.53441	0.945	0	1.60088e-51	Nip	LOC_Os10g02394
6.18052e-56	2.24531	0.945	0	1.60088e-51	Nip	LOC_Os10g40710
2.77494e-55	1.76905	0.937	0	7.18765e-51	Nip	EVM0044414
1.23375e-54	2.09482	0.929	0	3.19567e-50	Nip	LOC_Os02g09220
1.2338e-54	1.86226	0.929	0	3.19578e-50	Nip	LOC_Os06g30924
1.24761e-54	2.41857	0.984	0.11	3.23156e-50	Nip	LOC_Os10g36703
1.02336e-52	1.57598	0.906	0	2.6507e-48	Nip	LOC_Os03g54980
1.85577e-51	2.12331	0.89	0	4.80681e-47	Nip	LOC_Os02g37290
7.79158e-51	2.78155	0.882	0	2.01817e-46	Nip	LOC_Os06g05020
4.59517e-50	2.36553	1	0.523	1.19024e-45	Nip	LOC_Os06g05930
8.29147e-50	1.7842	0.945	0.122	2.14766e-45	Nip	LOC_Os02g51890
1.22728e-49	1.80221	0.953	0.163	3.17891e-45	Nip	LOC_Os06g38210
1.46167e-49	2.4058	0.953	0.157	3.78603e-45	Nip	LOC_Os06g22960
3.62237e-49	1.60834	1	0.89	9.38267e-45	Nip	LOC_Os02g07910
5.45338e-49	1.58416	0.858	0	1.41253e-44	Nip	LOC_Os03g08024
7.64521e-49	1.65825	0.992	0.279	1.98026e-44	Nip	LOC_Os08g37320
2.2064e-48	2.00184	0.85	0	5.71502e-44	Nip	LOC_Os10g40520
3.51469e-47	1.42331	0.835	0	9.10375e-43	Nip	LOC_Os04g37774
3.65469e-47	2.009	0.858	0.023	9.46637e-43	Nip	LOC_Os02g54880
5.46425e-47	1.92098	0.913	0.093	1.41535e-42	Nip	LOC_Os02g55600
1.38391e-46	1.51182	0.827	0	3.58459e-42	Nip	LOC_Os07g37100
4.46068e-46	1.87569	0.929	0.157	1.1554e-41	Nip	LOC_Os02g50600
1.07675e-45	1.80235	0.992	0.436	2.78901e-41	Nip	LOC_Os01g59900
1.13599e-45	1.52825	0.913	0.128	2.94243e-41	Nip	LOC_Os12g42850
1.74468e-45	1.79507	0.953	0.203	4.51906e-41	Nip	LOC_Os08g30510
8.00845e-45	1.51647	0.803	0	2.07435e-40	Nip	LOC_Os09g30418
8.0087e-45	1.25546	0.803	0	2.07441e-40	Nip	LOC_Os05g40770
1.69931e-44	2.45063	0.827	0.029	4.40155e-40	Nip	LOC_Os04g02530
3.04365e-44	1.36771	0.795	0	7.88366e-40	Nip	LOC_Os11g45890
3.21476e-44	2.27845	0.961	0.331	8.32687e-40	Nip	LOC_Os05g27780
1.14668e-43	1.72237	0.787	0	2.97013e-39	Nip	LOC_Os10g38501
1.37884e-43	1.19586	1	0.721	3.57146e-39	Nip	LOC_Os03g48110
4.2828e-43	1.53622	0.78	0	1.10933e-38	Nip	LOC_Os01g71740
4.2828e-43	1.18091	0.78	0	1.10933e-38	Nip	LOC_Os12g13674
5.82252e-42	2.34004	0.764	0	1.50815e-37	Nip	LOC_Os07g03499
7.4495e-42	1.34759	0.858	0.093	1.92957e-37	Nip	LOC_Os09g19350
1.73506e-41	1.62416	0.913	0.192	4.49414e-37	Nip	LOC_Os02g31030
4.09141e-41	1.94568	0.811	0.052	1.05976e-36	Nip	LOC_Os03g15050
4.88505e-41	1.97302	0.992	0.703	1.26533e-36	Nip	LOC_Os03g25280
2.7389e-40	2.07711	0.74	0	7.0943e-36	Nip	LOC_Os03g16030
2.7389e-40	1.06368	0.74	0	7.0943e-36	Nip	LOC_Os03g20790
3.15652e-40	1.8892	0.858	0.157	8.17601e-36	Nip	LOC_Os12g01400
7.73886e-40	1.86965	0.835	0.11	2.00452e-35	Nip	LOC_Os05g45020
2.16383e-39	1.30169	0.961	0.448	5.60475e-35	Nip	LOC_Os03g53190
3.08453e-39	1.28297	0.732	0.006	7.98954e-35	Nip	LOC_Os01g03144
6.47686e-39	1.52127	0.913	0.256	1.67764e-34	Nip	LOC_Os03g55540
4.13986e-38	1.87182	0.709	0	1.07231e-33	Nip	LOC_Os02g48714
1.29975e-37	1.10623	0.732	0.017	3.36662e-33	Nip	LOC_Os04g01310
1.42222e-37	1.17324	0.701	0	3.68385e-33	Nip	Add_EVM0015885
1.42222e-37	1.08064	0.701	0	3.68385e-33	Nip	LOC_Os06g33919
1.53933e-37	1.3799	0.709	0.006	3.98717e-33	Nip	LOC_Os12g28015
5.6791e-37	1.16355	1	0.843	1.471e-32	Nip	LOC_Os01g55830
1.04884e-36	1.6964	0.969	0.64	2.71671e-32	Nip	LOC_Os07g47670
1.72292e-36	1.8614	0.693	0.006	4.4627e-32	Nip	LOC_Os01g24710
2.90644e-36	1.43859	0.724	0.023	7.52826e-32	Nip	LOC_Os10g38360
3.02395e-36	1.37102	0.937	0.401	7.83262e-32	Nip	LOC_Os02g38980
5.49542e-36	1.29373	0.677	0	1.42342e-31	Nip	LOC_Os08g10500
9.49073e-36	1.34532	0.732	0.047	2.45829e-31	Nip	LOC_Os06g11290
1.82859e-35	1.00233	0.669	0	4.73642e-31	Nip	LOC_Os08g13280
3.11675e-35	1.93933	0.882	0.384	8.073e-31	Nip	LOC_Os03g18130
6.03702e-35	1.2901	0.661	0	1.56371e-30	Nip	LOC_Os12g35590
1.97761e-34	0.98693	0.654	0	5.12242e-30	Nip	LOC_Os01g05959
2.20642e-34	0.907855	1	0.936	5.71506e-30	Nip	LOC_Os02g41650
4.14831e-34	1.1153	0.874	0.233	1.07449e-29	Nip	LOC_Os05g49880
3.24349e-33	1.33398	0.709	0.058	8.40128e-29	Nip	LOC_Os07g49114
4.91349e-33	1.04293	0.701	0.047	1.27269e-28	Nip	LOC_Os06g49490
6.63747e-33	0.984877	0.63	0	1.71924e-28	Nip	LOC_Os11g14544
6.63747e-33	0.950032	0.63	0	1.71924e-28	Nip	LOC_Os04g32330
7.29956e-33	1.33162	0.772	0.122	1.89073e-28	Nip	LOC_Os02g44470
2.10857e-32	0.833389	0.622	0	5.46162e-28	Nip	LOC_Os02g10370
2.10863e-32	0.935809	0.622	0	5.46176e-28	Nip	LOC_Os07g28644
2.10863e-32	0.801999	0.622	0	5.46176e-28	Nip	LOC_Os05g43252
2.65397e-32	1.3988	0.89	0.355	6.87432e-28	Nip	LOC_Os02g16040
3.54066e-32	0.934996	0.661	0.023	9.17102e-28	Nip	LOC_Os01g68060
3.64402e-32	1.27581	0.724	0.076	9.43875e-28	Nip	LOC_Os03g58040
1.09619e-31	0.895359	1	0.953	2.83935e-27	Nip	LOC_Os08g03350
1.32666e-31	1.20063	0.787	0.151	3.43632e-27	Nip	LOC_Os08g34150
1.63658e-31	0.912887	1	0.895	4.23907e-27	Nip	LOC_Os12g42980
2.1345e-31	0.892808	0.701	0.058	5.52878e-27	Nip	LOC_Os09g25314
4.3906e-31	1.21079	0.976	0.686	1.13725e-26	Nip	LOC_Os06g10890
1.08134e-30	1.20275	0.969	0.541	2.80088e-26	Nip	LOC_Os03g13300
1.99273e-30	0.965047	0.591	0	5.16156e-26	Nip	LOC_Os05g10414
1.99278e-30	0.91993	0.591	0	5.16169e-26	Nip	LOC_Os09g09560
5.40586e-30	1.23405	0.835	0.198	1.40023e-25	Nip	LOC_Os01g40870
6.09961e-30	0.888886	0.583	0	1.57992e-25	Nip	LOC_Os05g16740
7.47684e-30	1.01618	0.969	0.628	1.93665e-25	Nip	LOC_Os07g14150
7.54375e-30	2.08899	0.598	0.012	1.95398e-25	Nip	LOC_Os09g24370
7.62183e-30	0.833032	0.63	0.023	1.97421e-25	Nip	LOC_Os02g29550
8.82977e-30	0.921867	0.693	0.076	2.28709e-25	Nip	LOC_Os10g42299
9.79412e-30	0.709985	1	0.994	2.53687e-25	Nip	LOC_Os10g30790
1.47761e-29	1.27592	0.795	0.198	3.82731e-25	Nip	LOC_Os01g16030
1.85345e-29	0.937519	0.575	0	4.80081e-25	Nip	LOC_Os01g25030
1.85345e-29	0.756093	0.575	0	4.80081e-25	Nip	LOC_Os01g50934
3.82303e-29	0.90499	0.583	0.006	9.90242e-25	Nip	LOC_Os11g11960
5.39172e-29	1.07218	0.63	0.041	1.39656e-24	Nip	LOC_Os02g02780
7.26997e-29	1.40423	0.921	0.453	1.88307e-24	Nip	LOC_Os02g44500
1.36805e-28	1.9028	0.685	0.076	3.54352e-24	Nip	LOC_Os02g33820
1.45168e-28	1.01029	0.638	0.047	3.76015e-24	Nip	LOC_Os02g51670
2.58039e-28	0.984174	0.567	0.006	6.68373e-24	Nip	LOC_Os04g03920
3.27891e-28	0.963009	0.85	0.297	8.49303e-24	Nip	LOC_Os01g01369
4.98019e-28	0.924884	0.551	0	1.28997e-23	Nip	LOC_Os05g29170
4.98019e-28	0.85617	0.551	0	1.28997e-23	Nip	LOC_Os12g03800
4.98019e-28	0.722245	0.551	0	1.28997e-23	Nip	LOC_Os01g01700
1.19639e-27	1.50583	0.858	0.326	3.0989e-23	Nip	LOC_Os11g10480
1.47056e-27	0.745615	0.543	0	3.80904e-23	Nip	LOC_Os04g01674
1.62545e-27	1.33888	0.583	0.017	4.21024e-23	Nip	LOC_Os06g51050
1.76249e-27	1.46196	0.961	0.634	4.5652e-23	Nip	LOC_Os10g26150
4.31184e-27	0.770529	0.535	0	1.11685e-22	Nip	LOC_Os04g23140
4.66766e-27	1.31636	0.772	0.215	1.20902e-22	Nip	LOC_Os09g36830
5.67392e-27	0.844578	0.551	0.006	1.46966e-22	Nip	LOC_Os09g29270
6.01568e-27	1.0022	0.843	0.343	1.55818e-22	Nip	LOC_Os03g22810
8.6206e-27	0.856867	0.669	0.07	2.23291e-22	Nip	LOC_Os11g18170
2.66308e-26	0.946862	0.685	0.087	6.89792e-22	Nip	LOC_Os03g25040
3.63026e-26	0.851334	0.52	0	9.40311e-22	Nip	LOC_Os11g39530
4.36866e-26	1.04726	1	0.692	1.13157e-21	Nip	LOC_Os10g22570
8.4784e-26	1.38893	0.85	0.302	2.19607e-21	Nip	LOC_Os04g59150
1.10742e-25	0.495817	1	1	2.86843e-21	Nip	LOC_Os06g07969
1.36651e-25	1.00517	0.63	0.07	3.53954e-21	Nip	LOC_Os01g24030
1.59393e-25	0.742616	1	1	4.12859e-21	Nip	LOC_Os01g18170
2.18502e-25	1.39731	0.709	0.163	5.65964e-21	Nip	LOC_Os12g25690
2.46592e-25	1.29772	0.858	0.39	6.38723e-21	Nip	LOC_Os05g25850
2.7844e-25	0.995075	0.898	0.378	7.21216e-21	Nip	LOC_Os04g58880
2.97334e-25	0.899078	0.504	0	7.70154e-21	Nip	LOC_Os04g17084
3.78799e-25	1.15531	0.874	0.291	9.81165e-21	Nip	LOC_Os01g66900
3.99332e-25	0.998916	0.827	0.331	1.03435e-20	Nip	LOC_Os07g07350
6.43547e-25	0.837026	0.528	0.017	1.66692e-20	Nip	LOC_Os07g36410
1.25808e-24	0.739115	0.567	0.041	3.25869e-20	Nip	LOC_Os05g45900
1.44898e-24	0.708107	0.969	0.837	3.75316e-20	Nip	LOC_Os09g31260
1.61092e-24	1.1207	0.63	0.087	4.1726e-20	Nip	LOC_Os01g27240
2.37001e-24	0.699396	0.488	0	6.1388e-20	Nip	LOC_Os03g10700
2.38486e-24	1.04941	0.661	0.122	6.17726e-20	Nip	LOC_Os08g10100
2.42843e-24	1.14486	0.724	0.157	6.29012e-20	Nip	LOC_Os03g15270
2.59731e-24	0.833348	0.591	0.064	6.72754e-20	Nip	LOC_Os01g32080
3.3758e-24	0.850914	0.709	0.163	8.744e-20	Nip	LOC_Os06g12690
4.53554e-24	1.10505	0.874	0.39	1.1748e-19	Nip	LOC_Os01g15029
5.17522e-24	0.854063	0.591	0.052	1.34049e-19	Nip	LOC_Os06g19070
6.11421e-24	0.766498	1	0.831	1.5837e-19	Nip	LOC_Os05g13580
6.50438e-24	0.772768	0.78	0.203	1.68477e-19	Nip	LOC_Os08g04390
6.62417e-24	1.41623	0.48	0	1.71579e-19	Nip	LOC_Os04g35750
6.62417e-24	0.844895	0.48	0	1.71579e-19	Nip	LOC_Os04g36319
1.00111e-23	0.755266	1	0.959	2.59308e-19	Nip	LOC_Os01g67860
1.18854e-23	1.2774	0.85	0.436	3.07856e-19	Nip	LOC_Os01g64520
1.83919e-23	0.823839	0.472	0	4.76387e-19	Nip	LOC_Os07g12780
2.8286e-23	1.1084	0.685	0.163	7.32664e-19	Nip	LOC_Os01g67950
2.98864e-23	0.869532	0.654	0.11	7.74119e-19	Nip	LOC_Os01g57450
3.40144e-23	0.80082	0.535	0.035	8.81041e-19	Nip	LOC_Os02g07010
3.80999e-23	0.907495	1	0.988	9.86863e-19	Nip	LOC_Os07g03279
5.07289e-23	0.741913	0.465	0	1.31398e-18	Nip	LOC_Os06g21924
5.07289e-23	0.64606	0.465	0	1.31398e-18	Nip	LOC_Os12g07710
8.2766e-23	0.932215	0.559	0.052	2.1438e-18	Nip	LOC_Os06g35560
8.34124e-23	0.984859	0.827	0.372	2.16055e-18	Nip	LOC_Os11g39220
1.1222e-22	1.01209	0.496	0.017	2.90673e-18	Nip	LOC_Os12g04150
1.39008e-22	0.640395	0.457	0	3.60059e-18	Nip	LOC_Os03g59740
2.17075e-22	0.732486	0.685	0.145	5.62268e-18	Nip	LOC_Os03g13540
3.76707e-22	0.680669	0.528	0.035	9.75747e-18	Nip	LOC_Os10g39220
3.78444e-22	0.635881	0.449	0	9.80246e-18	Nip	LOC_Os03g37864
4.65295e-22	0.796101	0.606	0.093	1.20521e-17	Nip	LOC_Os09g18450
6.16926e-22	1.03224	0.929	0.738	1.59796e-17	Nip	LOC_Os03g19270
6.88211e-22	0.709354	0.661	0.128	1.7826e-17	Nip	LOC_Os07g41820
7.7955e-22	1.2186	0.787	0.297	2.01919e-17	Nip	LOC_Os01g65830
9.63353e-22	0.736436	0.504	0.029	2.49528e-17	Nip	LOC_Os03g18870
1.02367e-21	0.797678	0.441	0	2.65152e-17	Nip	LOC_Os01g43720
1.7195e-21	1.04809	0.472	0.017	4.45384e-17	Nip	LOC_Os01g55240
2.06816e-21	0.806305	0.906	0.471	5.35694e-17	Nip	LOC_Os06g13810
2.52665e-21	0.948425	0.921	0.61	6.54452e-17	Nip	LOC_Os02g52550
2.75118e-21	0.658289	0.433	0	7.12612e-17	Nip	LOC_Os07g34670
2.75131e-21	0.70904	0.433	0	7.12644e-17	Nip	LOC_Os11g47574
2.75131e-21	0.577169	0.433	0	7.12644e-17	Nip	LOC_Os03g19040
3.63791e-21	0.942367	0.74	0.25	9.42291e-17	Nip	LOC_Os03g25270
4.07531e-21	0.787504	0.976	0.82	1.05559e-16	Nip	LOC_Os01g69870
4.12671e-21	0.903088	0.898	0.523	1.0689e-16	Nip	LOC_Os04g53560
5.09064e-21	0.657177	0.441	0.006	1.31858e-16	Nip	LOC_Os05g02240
5.9606e-21	0.985003	0.646	0.14	1.54391e-16	Nip	LOC_Os07g48550
7.34779e-21	1.13778	0.425	0	1.90323e-16	Nip	LOC_Os07g37466
7.34779e-21	0.646875	0.425	0	1.90323e-16	Nip	LOC_Os05g49420
8.27325e-21	0.820751	0.535	0.064	2.14294e-16	Nip	LOC_Os06g01304
1.09544e-20	1.041	0.984	0.878	2.8374e-16	Nip	LOC_Os03g12510
1.22043e-20	0.863413	0.803	0.366	3.16115e-16	Nip	LOC_Os07g12340
1.24276e-20	0.766129	0.472	0.023	3.21901e-16	Nip	LOC_Os05g40630
1.29043e-20	0.765946	0.535	0.064	3.34246e-16	Nip	LOC_Os10g30850
1.30513e-20	0.868561	0.843	0.395	3.38055e-16	Nip	LOC_Os12g35610
1.5681e-20	0.859528	0.874	0.419	4.06168e-16	Nip	LOC_Os01g54670
1.64747e-20	0.646908	0.543	0.07	4.26729e-16	Nip	LOC_Os12g10560
1.7095e-20	0.773952	0.48	0.035	4.42794e-16	Nip	LOC_Os10g28340
2.52486e-20	0.575501	0.457	0.017	6.5399e-16	Nip	LOC_Os03g49990
2.58887e-20	0.550564	0.984	0.93	6.70568e-16	Nip	LOC_Os03g43410
2.78566e-20	0.750129	0.992	0.872	7.21541e-16	Nip	LOC_Os07g07990
6.54878e-20	1.04334	0.567	0.093	1.69626e-15	Nip	LOC_Os09g25070
1.01447e-19	0.988733	0.89	0.366	2.62769e-15	Nip	LOC_Os07g41350
1.07797e-19	0.715032	0.496	0.047	2.79217e-15	Nip	LOC_Os07g08410
1.28571e-19	0.758051	0.701	0.192	3.33025e-15	Nip	LOC_Os01g64970
1.34791e-19	0.529856	0.402	0	3.49135e-15	Nip	LOC_Os07g12390
2.50524e-19	0.631325	0.433	0.017	6.48907e-15	Nip	LOC_Os02g04450
2.90063e-19	0.850432	0.52	0.064	7.5132e-15	Nip	LOC_Os11g29400
3.19981e-19	0.593083	1	1	8.28816e-15	Nip	LOC_Os12g43600
3.21397e-19	0.7394	0.409	0.006	8.32481e-15	Nip	LOC_Os05g01950
3.51115e-19	0.700355	0.394	0	9.09457e-15	Nip	LOC_Os01g52594
3.51115e-19	0.533587	0.394	0	9.09457e-15	Nip	LOC_Os01g34970
3.73444e-19	0.779965	0.465	0.041	9.67294e-15	Nip	LOC_Os08g43210
4.60556e-19	0.896788	0.992	0.785	1.19293e-14	Nip	LOC_Os04g53710
4.92922e-19	0.718499	0.543	0.087	1.27677e-14	Nip	LOC_Os01g56330
6.51637e-19	0.706299	0.992	0.878	1.68787e-14	Nip	LOC_Os01g68770
9.09001e-19	0.613161	0.386	0	2.35449e-14	Nip	LOC_Os05g35444
9.0904e-19	0.552097	0.386	0	2.35459e-14	Nip	LOC_Os11g28480
9.57406e-19	0.549772	0.441	0.023	2.47987e-14	Nip	LOC_Os03g64320
1.17653e-18	0.663942	0.929	0.628	3.04744e-14	Nip	LOC_Os03g55850
1.72532e-18	0.584732	0.496	0.052	4.46893e-14	Nip	LOC_Os01g65090
1.76164e-18	0.554606	0.425	0.017	4.563e-14	Nip	LOC_Os09g15365
2.19898e-18	0.966256	0.606	0.157	5.6958e-14	Nip	LOC_Os05g33570
2.22645e-18	0.867053	0.882	0.494	5.76694e-14	Nip	LOC_Os05g34710
2.31982e-18	0.646788	0.402	0.012	6.0088e-14	Nip	LOC_Os10g30600
2.33929e-18	0.680365	0.378	0	6.05922e-14	Nip	LOC_Os06g06490
2.37951e-18	0.992133	0.803	0.378	6.16342e-14	Nip	LOC_Os05g48900
4.15501e-18	0.577606	0.386	0.006	1.07623e-13	Nip	LOC_Os06g09900
5.00162e-18	0.552277	0.433	0.023	1.29552e-13	Nip	LOC_Os12g16350
5.98374e-18	0.921902	0.37	0	1.54991e-13	Nip	LOC_Os06g05010
7.09966e-18	1.07771	0.882	0.523	1.83895e-13	Nip	LOC_Os03g18220
8.80423e-18	0.837174	0.654	0.198	2.28047e-13	Nip	LOC_Os11g29290
8.84025e-18	0.420222	1	1	2.2898e-13	Nip	LOC_Os04g46960
9.98039e-18	0.651488	0.992	0.901	2.58512e-13	Nip	LOC_Os03g46770
1.13965e-17	0.553898	0.425	0.029	2.95191e-13	Nip	LOC_Os08g04470
1.5215e-17	0.623397	0.362	0	3.94099e-13	Nip	LOC_Os05g10650
1.5215e-17	0.554656	0.362	0	3.94099e-13	Nip	LOC_Os10g39410
1.54552e-17	0.876875	0.63	0.186	4.00321e-13	Nip	LOC_Os06g41450
1.61847e-17	0.916986	0.78	0.36	4.19217e-13	Nip	LOC_Os05g44922
1.9502e-17	0.991982	0.567	0.11	5.05141e-13	Nip	LOC_Os05g28740
2.48241e-17	0.961904	0.898	0.61	6.42995e-13	Nip	LOC_Os11g05050
2.81986e-17	0.611711	0.488	0.064	7.30401e-13	Nip	LOC_Os04g37904
3.29525e-17	0.919969	0.646	0.203	8.53535e-13	Nip	LOC_Os03g20500
3.87903e-17	0.758287	0.606	0.145	1.00475e-12	Nip	LOC_Os02g26810
4.8419e-17	0.782998	0.913	0.605	1.25415e-12	Nip	LOC_Os03g19260
6.81396e-17	0.781174	0.669	0.215	1.76495e-12	Nip	LOC_Os01g06600
7.98116e-17	0.761697	0.756	0.326	2.06728e-12	Nip	LOC_Os05g01030
8.18608e-17	1.10964	0.512	0.093	2.12036e-12	Nip	LOC_Os11g47520
9.66446e-17	0.561191	0.346	0	2.50329e-12	Nip	LOC_Os10g38314
9.66466e-17	0.478301	0.346	0	2.50334e-12	Nip	LOC_Os07g39350
9.7989e-17	0.858846	0.472	0.064	2.53811e-12	Nip	LOC_Os06g48000
1.20866e-16	1.12822	0.835	0.465	3.13066e-12	Nip	LOC_Os07g44590
1.58905e-16	0.57527	0.354	0.006	4.11595e-12	Nip	LOC_Os05g45710
1.86874e-16	0.423562	0.354	0.006	4.84041e-12	Nip	LOC_Os12g32180
2.66904e-16	0.794038	1	0.913	6.91334e-12	Nip	LOC_Os05g04440
3.02796e-16	0.468686	0.394	0.023	7.84301e-12	Nip	LOC_Os11g36430
3.15774e-16	1.04149	0.591	0.169	8.17917e-12	Nip	LOC_Os07g47620
3.45456e-16	0.56378	0.465	0.058	8.94801e-12	Nip	LOC_Os07g26440
3.5421e-16	0.588399	0.543	0.105	9.17476e-12	Nip	LOC_Os01g38480
3.96734e-16	0.700052	0.433	0.052	1.02762e-11	Nip	LOC_Os04g43760
4.24204e-16	0.545737	0.346	0.006	1.09877e-11	Nip	LOC_Os02g38392
4.37761e-16	0.750067	0.472	0.064	1.13389e-11	Nip	LOC_Os08g04360
4.77391e-16	0.790795	0.78	0.326	1.23654e-11	Nip	LOC_Os11g06720
4.82744e-16	0.95515	0.669	0.25	1.2504e-11	Nip	LOC_Os03g51530
4.90874e-16	0.57241	0.457	0.058	1.27146e-11	Nip	LOC_Os06g05470
5.99795e-16	0.672007	0.331	0	1.55359e-11	Nip	LOC_Os04g56040
6.61339e-16	0.538906	0.984	0.785	1.713e-11	Nip	LOC_Os03g05640
7.02093e-16	0.871769	0.614	0.18	1.81856e-11	Nip	LOC_Os06g04990
1.06461e-15	0.662959	0.614	0.174	2.75754e-11	Nip	LOC_Os01g04800
1.4606e-15	0.769008	0.764	0.349	3.78324e-11	Nip	LOC_Os06g47130
1.48143e-15	0.465865	0.323	0	3.83719e-11	Nip	LOC_Os01g57250
1.48143e-15	0.414038	0.323	0	3.83719e-11	Nip	LOC_Os09g20820
1.66462e-15	0.788185	0.953	0.715	4.3117e-11	Nip	LOC_Os02g33070
1.68862e-15	0.578382	0.929	0.698	4.37387e-11	Nip	LOC_Os03g16150
2.47113e-15	1.20295	0.78	0.32	6.40071e-11	Nip	LOC_Os10g40510
3.63831e-15	0.646376	0.315	0	9.42394e-11	Nip	LOC_Os10g38780
4.00583e-15	0.722025	0.945	0.797	1.03759e-10	Nip	LOC_Os01g19820
4.3094e-15	0.73627	0.598	0.163	1.11622e-10	Nip	LOC_Os03g20290
4.32163e-15	0.606717	1	0.971	1.11939e-10	Nip	LOC_Os05g04410
4.40137e-15	0.757709	0.945	0.907	1.14004e-10	Nip	LOC_Os07g37320
4.50907e-15	0.687729	0.913	0.634	1.16794e-10	Nip	LOC_Os04g31070
4.51241e-15	0.563437	0.409	0.047	1.1688e-10	Nip	LOC_Os01g51380
4.73869e-15	0.718651	0.953	0.797	1.22742e-10	Nip	LOC_Os01g21120
5.20773e-15	0.52344	0.402	0.047	1.34891e-10	Nip	LOC_Os01g63470
5.44856e-15	0.607012	0.457	0.07	1.41129e-10	Nip	LOC_Os03g20670
6.1131e-15	0.499431	0.354	0.017	1.58341e-10	Nip	LOC_Os03g22420
7.73402e-15	0.547066	0.378	0.029	2.00327e-10	Nip	LOC_Os08g06320
8.88556e-15	0.625483	0.307	0	2.30154e-10	Nip	LOC_Os01g06220
8.88556e-15	0.398293	0.307	0	2.30154e-10	Nip	LOC_Os05g47446
9.10314e-15	0.746957	0.551	0.14	2.35789e-10	Nip	LOC_Os08g35190
9.15861e-15	0.598349	0.882	0.5	2.37226e-10	Nip	LOC_Os03g32170
1.06555e-14	0.58714	0.961	0.919	2.75998e-10	Nip	LOC_Os04g55920
1.25014e-14	0.373831	0.323	0.006	3.23811e-10	Nip	LOC_Os01g69850
1.35651e-14	0.693363	0.866	0.535	3.51363e-10	Nip	LOC_Os08g13840
1.44317e-14	0.529887	0.449	0.07	3.7381e-10	Nip	LOC_Os12g37870
1.49828e-14	0.671525	0.457	0.081	3.88084e-10	Nip	LOC_Os05g50500
1.55946e-14	0.708157	0.961	0.802	4.03931e-10	Nip	LOC_Os06g14370
2.15804e-14	0.447561	0.299	0	5.58975e-10	Nip	LOC_Os11g44580
2.15804e-14	0.395608	0.299	0	5.58975e-10	Nip	LOC_Os02g50470
2.15804e-14	0.367047	0.299	0	5.58975e-10	Nip	LOC_Os09g19734
2.20811e-14	0.433664	0.315	0.006	5.71944e-10	Nip	LOC_Os07g30940
2.49065e-14	0.648562	0.685	0.291	6.45128e-10	Nip	LOC_Os11g13810
3.17753e-14	0.756075	0.685	0.262	8.23044e-10	Nip	LOC_Os03g05620
3.95084e-14	0.418034	0.307	0.006	1.02335e-09	Nip	LOC_Os07g26000
4.0049e-14	0.513312	0.402	0.047	1.03735e-09	Nip	LOC_Os09g32960
4.08309e-14	0.631639	0.559	0.157	1.0576e-09	Nip	LOC_Os06g16410
4.0884e-14	0.586358	0.811	0.419	1.05898e-09	Nip	LOC_Os03g52720
5.03966e-14	0.878928	0.583	0.163	1.30537e-09	Nip	LOC_Os10g40530
5.2125e-14	0.439814	0.291	0	1.35014e-09	Nip	LOC_Os07g31190
5.37939e-14	0.874103	0.669	0.279	1.39337e-09	Nip	LOC_Os01g14660
5.41792e-14	0.578892	0.307	0.006	1.40335e-09	Nip	LOC_Os07g33660
5.64556e-14	0.653995	0.835	0.5	1.46231e-09	Nip	LOC_Os12g35670
5.95238e-14	0.58008	0.858	0.483	1.54178e-09	Nip	LOC_Os07g19444
6.9364e-14	0.453562	0.315	0.012	1.79667e-09	Nip	LOC_Os05g34500
6.97913e-14	0.631563	0.504	0.122	1.80773e-09	Nip	LOC_Os01g21590
8.80389e-14	0.4981	0.315	0.012	2.28038e-09	Nip	LOC_Os05g10930
8.82754e-14	0.644337	0.52	0.116	2.28651e-09	Nip	LOC_Os03g18850
1.07538e-13	1.1161	0.551	0.169	2.78545e-09	Nip	LOC_Os09g20220
1.22276e-13	0.453599	0.386	0.047	3.16721e-09	Nip	LOC_Os06g04130
1.25219e-13	0.597285	0.283	0	3.24342e-09	Nip	LOC_Os12g36220
1.25219e-13	0.427196	0.283	0	3.24342e-09	Nip	LOC_Os11g15000
1.25219e-13	0.343642	0.283	0	3.24342e-09	Nip	LOC_Os09g15044
1.29921e-13	0.495773	0.323	0.017	3.36523e-09	Nip	LOC_Os03g18820
1.44736e-13	0.76277	0.465	0.081	3.74895e-09	Nip	LOC_Os03g52355
1.50762e-13	0.498084	0.323	0.017	3.90502e-09	Nip	LOC_Os03g16480
1.53584e-13	0.796387	0.835	0.535	3.97813e-09	Nip	LOC_Os04g09570
1.59073e-13	0.554794	0.346	0.029	4.1203e-09	Nip	LOC_Os01g52500
1.63536e-13	0.549545	1	0.977	4.23591e-09	Nip	LOC_Os03g61470
1.82243e-13	0.461672	0.394	0.047	4.72045e-09	Nip	LOC_Os09g25310
1.83969e-13	0.64401	0.677	0.262	4.76516e-09	Nip	LOC_Os03g14450
1.99251e-13	0.495318	0.433	0.07	5.16101e-09	Nip	LOC_Os04g38480
2.05462e-13	0.493464	0.386	0.047	5.32189e-09	Nip	LOC_Os10g37240
2.17543e-13	0.694419	0.709	0.343	5.63481e-09	Nip	LOC_Os11g47710
2.45425e-13	0.538945	0.457	0.081	6.35701e-09	Nip	LOC_Os09g23650
2.9876e-13	0.940981	0.512	0.134	7.73847e-09	Nip	LOC_Os12g05050
2.99195e-13	0.529409	0.276	0	7.74976e-09	Nip	LOC_Os03g15080
2.99195e-13	0.434907	0.276	0	7.74976e-09	Nip	LOC_Os10g28254
2.99195e-13	0.364777	0.276	0	7.74976e-09	Nip	LOC_Os01g26070
3.22188e-13	0.840572	0.528	0.145	8.34532e-09	Nip	LOC_Os02g10520
3.24743e-13	0.41186	0.307	0.012	8.4115e-09	Nip	LOC_Os12g41820
5.04063e-13	0.684968	0.811	0.384	1.30562e-08	Nip	LOC_Os03g52370
5.37781e-13	0.847297	0.283	0.006	1.39296e-08	Nip	LOC_Os07g44890
6.82339e-13	0.500405	0.299	0.012	1.76739e-08	Nip	LOC_Os11g42500
6.90771e-13	0.626668	0.661	0.285	1.78923e-08	Nip	LOC_Os02g43170
7.11094e-13	1.25452	0.268	0	1.84187e-08	Nip	LOC_Os10g21670
7.11094e-13	0.384081	0.268	0	1.84187e-08	Nip	LOC_Os04g35534
7.11094e-13	0.36054	0.268	0	1.84187e-08	Nip	LOC_Os06g07869
7.37864e-13	0.587407	0.929	0.692	1.91122e-08	Nip	LOC_Os01g47730
7.45039e-13	0.732728	0.701	0.314	1.9298e-08	Nip	LOC_Os01g71860
7.54344e-13	0.347938	0.299	0.012	1.9539e-08	Nip	LOC_Os08g37480
7.7284e-13	0.736453	0.827	0.552	2.00181e-08	Nip	LOC_Os08g01830
7.96252e-13	0.675309	0.488	0.134	2.06245e-08	Nip	LOC_Os03g06390
8.11869e-13	0.355805	1	1	2.1029e-08	Nip	LOC_Os01g25540
8.1786e-13	0.696291	0.803	0.471	2.11842e-08	Nip	LOC_Os10g25130
8.20135e-13	0.694233	0.559	0.18	2.12431e-08	Nip	LOC_Os05g43040
1.0621e-12	0.85749	0.425	0.076	2.75106e-08	Nip	LOC_Os08g04340
1.35315e-12	0.60485	0.906	0.634	3.50493e-08	Nip	LOC_Os01g02920
1.35469e-12	0.82781	0.606	0.233	3.50893e-08	Nip	LOC_Os07g08710
1.55125e-12	0.418884	0.291	0.012	4.01806e-08	Nip	LOC_Os10g04270
1.64145e-12	0.58397	0.756	0.36	4.25168e-08	Nip	LOC_Os07g35810
1.68117e-12	0.372152	0.26	0	4.35457e-08	Nip	LOC_Os01g03620
1.86936e-12	0.385347	0.315	0.023	4.842e-08	Nip	LOC_Os08g13320
1.88905e-12	0.499024	0.276	0.006	4.89301e-08	Nip	LOC_Os12g02570
1.90923e-12	0.762687	0.457	0.11	4.9453e-08	Nip	LOC_Os04g34970
2.08295e-12	0.699162	0.693	0.343	5.39525e-08	Nip	LOC_Os10g40600
2.34193e-12	0.412374	0.323	0.029	6.06606e-08	Nip	LOC_Os10g25674
2.92128e-12	0.589926	0.756	0.419	7.5667e-08	Nip	LOC_Os01g48444
3.23908e-12	0.618949	0.717	0.337	8.38986e-08	Nip	LOC_Os07g12150
3.37598e-12	0.557348	0.748	0.39	8.74446e-08	Nip	LOC_Os05g09490
3.60361e-12	0.916481	0.945	0.826	9.33407e-08	Nip	LOC_Os06g20150
3.70804e-12	0.642396	0.953	0.878	9.60456e-08	Nip	LOC_Os02g40840
3.93057e-12	0.400627	0.268	0.006	1.0181e-07	Nip	LOC_Os03g21040
3.94014e-12	0.379409	0.283	0.012	1.02057e-07	Nip	LOC_Os02g39010
3.95399e-12	0.464256	0.252	0	1.02416e-07	Nip	LOC_Os06g01870
3.95399e-12	0.354779	0.252	0	1.02416e-07	Nip	LOC_Os09g27744
4.75921e-12	0.592918	0.433	0.105	1.23273e-07	Nip	LOC_Os04g40560
4.79257e-12	0.977326	0.638	0.285	1.24137e-07	Nip	LOC_Os10g26700
5.04148e-12	0.463391	0.307	0.023	1.30584e-07	Nip	LOC_Os11g47530
5.45308e-12	0.438378	0.346	0.041	1.41246e-07	Nip	LOC_Os05g48060
5.47733e-12	0.396859	0.354	0.047	1.41874e-07	Nip	LOC_Os10g41520
5.70425e-12	0.683508	0.622	0.233	1.47751e-07	Nip	LOC_Os07g35860
6.3812e-12	0.634554	0.354	0.052	1.65286e-07	Nip	LOC_Os07g47790
7.04105e-12	0.558039	0.606	0.215	1.82377e-07	Nip	LOC_Os04g58920
7.06635e-12	0.491472	0.724	0.285	1.83033e-07	Nip	LOC_Os02g12690
7.11159e-12	0.621172	0.583	0.203	1.84204e-07	Nip	LOC_Os03g53070
7.35284e-12	0.645113	0.827	0.541	1.90453e-07	Nip	LOC_Os03g29410
8.4913e-12	0.428988	0.409	0.076	2.19942e-07	Nip	LOC_Os11g35330
8.49429e-12	0.499675	0.528	0.151	2.20019e-07	Nip	LOC_Os08g08190
8.57464e-12	0.427062	0.276	0.012	2.221e-07	Nip	LOC_Os11g13490
9.02169e-12	0.497701	0.26	0.006	2.3368e-07	Nip	LOC_Os07g48490
9.2518e-12	0.364463	0.244	0	2.3964e-07	Nip	LOC_Os02g56820
9.2518e-12	0.351215	0.244	0	2.3964e-07	Nip	LOC_Os11g29140
9.2518e-12	0.343316	0.244	0	2.3964e-07	Nip	LOC_Os02g39920
9.2518e-12	0.3313	0.244	0	2.3964e-07	Nip	LOC_Os09g20579
9.2518e-12	0.304196	0.244	0	2.3964e-07	Nip	LOC_Os10g34802
9.91829e-12	0.497258	0.52	0.157	2.56904e-07	Nip	LOC_Os03g11420
1.05983e-11	0.465391	0.283	0.017	2.74516e-07	Nip	LOC_Os04g17660
1.18503e-11	0.343876	0.26	0.006	3.06947e-07	Nip	LOC_Os06g24711
1.18526e-11	0.526617	0.465	0.116	3.07007e-07	Nip	LOC_Os02g35490
1.22825e-11	0.623877	0.52	0.169	3.18142e-07	Nip	LOC_Os01g32770
1.53686e-11	0.512464	0.937	0.785	3.98077e-07	Nip	LOC_Os02g43850
1.72604e-11	0.356285	0.323	0.035	4.47078e-07	Nip	LOC_Os03g03420
1.76715e-11	0.554709	0.252	0.006	4.57726e-07	Nip	LOC_Os02g57280
1.91918e-11	0.560051	0.268	0.012	4.97106e-07	Nip	LOC_Os07g06850
2.03304e-11	0.800126	0.937	0.808	5.26597e-07	Nip	LOC_Os11g02080
2.13143e-11	0.900436	0.638	0.273	5.52083e-07	Nip	LOC_Os05g30500
2.15383e-11	0.364541	0.236	0	5.57886e-07	Nip	LOC_Os11g44420
2.15383e-11	0.363127	0.236	0	5.57886e-07	Nip	LOC_Os05g45830
2.15383e-11	0.350986	0.236	0	5.57886e-07	Nip	LOC_Os01g27009
2.16824e-11	0.412029	0.252	0.006	5.61617e-07	Nip	LOC_Os05g26630
2.26616e-11	0.554656	0.575	0.203	5.8698e-07	Nip	LOC_Os03g32314
2.31512e-11	0.80146	0.693	0.331	5.99662e-07	Nip	LOC_Os02g36414
2.34141e-11	0.535014	0.976	0.884	6.06471e-07	Nip	LOC_Os04g52130
2.41359e-11	0.368766	0.268	0.012	6.25169e-07	Nip	LOC_Os12g24530
2.9019e-11	0.561173	0.37	0.064	7.51651e-07	Nip	LOC_Os04g55610
3.11554e-11	0.4614	0.291	0.023	8.06988e-07	Nip	LOC_Os08g28710
3.41482e-11	1.18173	0.724	0.424	8.84506e-07	Nip	LOC_Os10g30150
3.58522e-11	0.359817	0.283	0.023	9.28643e-07	Nip	LOC_Os06g36990
3.92034e-11	0.334625	0.291	0.023	1.01545e-06	Nip	LOC_Os04g35700
3.97615e-11	0.422486	0.346	0.052	1.0299e-06	Nip	LOC_Os03g21540
4.20303e-11	0.407205	0.307	0.035	1.08867e-06	Nip	LOC_Os01g34614
4.31544e-11	0.766414	0.559	0.209	1.11778e-06	Nip	LOC_Os02g14890
4.528e-11	0.404667	0.315	0.035	1.17284e-06	Nip	LOC_Os07g35340
4.57397e-11	0.683267	0.331	0.047	1.18475e-06	Nip	LOC_Os08g05960
4.64297e-11	0.540897	0.701	0.326	1.20262e-06	Nip	LOC_Os04g32740
4.9891e-11	0.34227	0.228	0	1.29228e-06	Nip	LOC_Os02g11830
4.9891e-11	0.336643	0.228	0	1.29228e-06	Nip	LOC_Os11g28600
4.9891e-11	0.25774	0.228	0	1.29228e-06	Nip	LOC_Os11g21296
5.65034e-11	0.485886	0.425	0.105	1.46355e-06	Nip	LOC_Os04g55640
5.73623e-11	0.369015	0.244	0.006	1.4858e-06	Nip	LOC_Os03g14730
6.4782e-11	0.912299	0.575	0.221	1.67798e-06	Nip	LOC_Os10g38340
8.00979e-11	0.621989	0.591	0.256	2.0747e-06	Nip	LOC_Os06g14180
8.11708e-11	0.522732	0.598	0.215	2.10249e-06	Nip	LOC_Os05g04550
8.95477e-11	0.530553	0.307	0.035	2.31946e-06	Nip	LOC_Os08g16050
9.66298e-11	0.673766	0.63	0.285	2.5029e-06	Nip	LOC_Os11g07040
1.01702e-10	0.535652	0.787	0.448	2.63427e-06	Nip	LOC_Os12g04240
1.09621e-10	0.358716	0.252	0.012	2.8394e-06	Nip	LOC_Os03g18770
1.14998e-10	0.293298	0.22	0	2.97867e-06	Nip	LOC_Os03g63999
1.14998e-10	0.277574	0.22	0	2.97867e-06	Nip	LOC_Os02g56930
1.14998e-10	0.266238	0.22	0	2.97867e-06	Nip	LOC_Os02g44300
1.24293e-10	0.577004	0.811	0.477	3.21943e-06	Nip	LOC_Os12g02200
1.2806e-10	0.647906	0.488	0.163	3.317e-06	Nip	LOC_Os02g03700
1.68396e-10	0.358474	0.276	0.023	4.3618e-06	Nip	LOC_Os10g32520
1.75212e-10	0.462521	0.992	0.843	4.53835e-06	Nip	LOC_Os03g25300
1.88061e-10	0.417192	0.331	0.052	4.87116e-06	Nip	LOC_Os11g30430
2.25622e-10	0.679945	0.748	0.43	5.84405e-06	Nip	LOC_Os04g02050
2.34076e-10	0.397645	0.402	0.093	6.06304e-06	Nip	LOC_Os04g41229
2.47115e-10	0.469149	0.394	0.093	6.40076e-06	Nip	LOC_Os05g41780
2.61848e-10	0.325315	0.244	0.012	6.78238e-06	Nip	LOC_Os07g14740
2.6378e-10	0.350775	0.213	0	6.83243e-06	Nip	LOC_Os09g18390
2.8806e-10	0.476128	0.929	0.703	7.46132e-06	Nip	LOC_Os03g05570
3.39396e-10	0.409876	0.307	0.041	8.79104e-06	Nip	LOC_Os04g41560
3.78817e-10	0.729666	0.512	0.192	9.81212e-06	Nip	LOC_Os09g29310
4.405e-10	0.422934	1	1	1.14098e-05	Nip	LOC_Os08g37670
5.39002e-10	0.665537	0.811	0.558	1.39612e-05	Nip	LOC_Os06g09450
5.67038e-10	0.535614	0.425	0.116	1.46874e-05	Nip	LOC_Os05g15530
5.68618e-10	0.390833	0.283	0.035	1.47283e-05	Nip	LOC_Os03g61060
6.02168e-10	0.373847	0.205	0	1.55974e-05	Nip	LOC_Os07g41860
6.02168e-10	0.333042	0.205	0	1.55974e-05	Nip	Add_EVM0005345
6.02168e-10	0.303397	0.205	0	1.55974e-05	Nip	EVM0047284
6.02168e-10	0.285422	0.205	0	1.55974e-05	Nip	LOC_Os09g32169
6.02168e-10	0.268064	0.205	0	1.55974e-05	Nip	LOC_Os11g10060
6.27041e-10	0.371847	1	0.983	1.62416e-05	Nip	LOC_Os01g25560
6.95072e-10	0.650935	0.921	0.849	1.80038e-05	Nip	LOC_Os08g37660
7.00225e-10	0.39466	0.992	0.942	1.81372e-05	Nip	LOC_Os03g14880
7.06468e-10	0.405023	0.953	0.866	1.82989e-05	Nip	LOC_Os09g32330
7.28964e-10	0.430052	0.362	0.076	1.88816e-05	Nip	LOC_Os12g17430
8.54399e-10	0.347669	0.299	0.041	2.21306e-05	Nip	LOC_Os01g42234
8.94219e-10	0.802445	0.425	0.122	2.31621e-05	Nip	LOC_Os02g52000
9.26606e-10	0.575372	0.457	0.14	2.40009e-05	Nip	LOC_Os08g19670
9.42291e-10	0.335757	0.26	0.023	2.44072e-05	Nip	LOC_Os03g18700
9.78264e-10	0.3614	0.354	0.064	2.5339e-05	Nip	LOC_Os11g11770
9.82278e-10	0.522298	0.512	0.186	2.5443e-05	Nip	LOC_Os01g47560
9.88631e-10	0.657913	0.457	0.14	2.56075e-05	Nip	LOC_Os01g61760
1.01899e-09	0.604129	0.354	0.076	2.63938e-05	Nip	LOC_Os04g46980
1.06811e-09	0.469861	0.559	0.227	2.76662e-05	Nip	LOC_Os12g18110
1.0932e-09	0.564961	0.78	0.506	2.83162e-05	Nip	LOC_Os11g02240
1.1479e-09	0.825847	0.717	0.5	2.97328e-05	Nip	LOC_Os12g24020
1.1854e-09	0.501502	0.646	0.314	3.07042e-05	Nip	LOC_Os09g16510
1.3682e-09	0.379499	0.197	0	3.54392e-05	Nip	LOC_Os03g32470
1.3682e-09	0.33525	0.197	0	3.54392e-05	Nip	LOC_Os03g56241
1.3682e-09	0.316946	0.197	0	3.54392e-05	Nip	LOC_Os03g02775
1.3682e-09	0.316712	0.197	0	3.54392e-05	Nip	LOC_Os06g41120
1.3682e-09	0.297429	0.197	0	3.54392e-05	Nip	LOC_Os11g42080
1.3682e-09	0.296804	0.197	0	3.54392e-05	Nip	LOC_Os12g26220
1.3682e-09	0.295259	0.197	0	3.54392e-05	Nip	LOC_Os08g02864
1.3682e-09	0.263738	0.197	0	3.54392e-05	Nip	LOC_Os10g41534
1.3897e-09	0.546959	0.457	0.151	3.5996e-05	Nip	LOC_Os07g42740
1.50166e-09	0.277562	0.213	0.006	3.88961e-05	Nip	LOC_Os02g06330
1.56534e-09	0.286122	0.236	0.017	4.05454e-05	Nip	LOC_Os09g17840
1.65662e-09	0.319498	0.244	0.017	4.29099e-05	Nip	LOC_Os04g56990
1.90016e-09	0.567106	0.496	0.186	4.9218e-05	Nip	LOC_Os04g44900
2.01835e-09	0.352639	0.409	0.105	5.22792e-05	Nip	LOC_Os06g35540
2.12652e-09	0.77561	0.591	0.279	5.50811e-05	Nip	LOC_Os01g41240
2.40407e-09	0.468829	0.866	0.593	6.22701e-05	Nip	LOC_Os12g10740
2.62905e-09	0.595009	0.803	0.547	6.80977e-05	Nip	LOC_Os01g50420
2.65726e-09	0.349954	1	0.948	6.88284e-05	Nip	LOC_Os06g27560
2.74374e-09	0.495357	0.276	0.035	7.10684e-05	Nip	LOC_Os02g15020
2.8206e-09	0.35117	0.276	0.035	7.30591e-05	Nip	LOC_Os06g50830
2.85792e-09	0.46738	0.417	0.116	7.40258e-05	Nip	LOC_Os01g43700
2.91792e-09	0.554115	0.669	0.366	7.55799e-05	Nip	LOC_Os08g25720
3.09442e-09	0.320502	0.189	0	8.01517e-05	Nip	LOC_Os08g31890
3.09442e-09	0.268726	0.189	0	8.01517e-05	Nip	LOC_Os07g08934
3.09442e-09	0.248646	0.189	0	8.01517e-05	Nip	LOC_Os06g50650
3.09442e-09	0.238695	0.189	0	8.01517e-05	Nip	LOC_Os09g26110
3.13592e-09	0.269122	0.22	0.012	8.12265e-05	Nip	LOC_Os07g39900
3.16753e-09	0.289262	0.205	0.006	8.20454e-05	Nip	LOC_Os12g03500
3.49512e-09	0.510683	0.654	0.326	9.05305e-05	Nip	LOC_Os05g28730
3.65785e-09	0.687759	0.433	0.145	9.47456e-05	Nip	LOC_Os11g39010
3.92585e-09	0.289871	0.205	0.006	0.000101687	Nip	LOC_Os01g32130
4.0938e-09	0.416709	1	0.994	0.000106038	Nip	LOC_Os07g17330
4.12447e-09	0.223222	0.205	0.006	0.000106832	Nip	LOC_Os02g34884
4.30769e-09	0.394757	0.244	0.023	0.000111578	Nip	LOC_Os01g58335
4.58164e-09	0.470311	0.504	0.186	0.000118674	Nip	LOC_Os11g44430
4.74846e-09	0.43739	0.535	0.198	0.000122995	Nip	LOC_Os05g46510
4.79607e-09	0.58878	0.78	0.483	0.000124228	Nip	LOC_Os03g08460
4.84146e-09	0.273881	0.244	0.023	0.000125403	Nip	LOC_Os03g21550
5.44832e-09	0.46683	0.339	0.07	0.000141122	Nip	LOC_Os01g40660
6.04534e-09	0.544621	0.953	0.82	0.000156587	Nip	LOC_Os10g11730
6.4178e-09	0.447284	0.661	0.337	0.000166234	Nip	LOC_Os04g10240
6.66412e-09	0.278241	0.268	0.035	0.000172614	Nip	LOC_Os05g48240
6.68216e-09	0.418683	0.583	0.262	0.000173081	Nip	LOC_Os03g13970
6.87853e-09	0.49677	0.323	0.064	0.000178168	Nip	LOC_Os03g58880
6.89111e-09	0.539582	0.346	0.087	0.000178494	Nip	LOC_Os05g51130
6.96698e-09	0.30829	0.181	0	0.000180459	Nip	LOC_Os02g10140
6.96698e-09	0.301099	0.181	0	0.000180459	Nip	LOC_Os11g44680
6.96698e-09	0.264555	0.181	0	0.000180459	Nip	LOC_Os09g27700
6.96698e-09	0.261464	0.181	0	0.000180459	Nip	LOC_Os06g42164
6.96698e-09	0.248834	0.181	0	0.000180459	Nip	LOC_Os01g43895
6.96698e-09	0.238157	0.181	0	0.000180459	Nip	LOC_Os12g15505
7.20888e-09	0.529576	0.535	0.233	0.000186724	Nip	LOC_Os06g34790
7.30173e-09	0.369957	0.425	0.134	0.000189129	Nip	LOC_Os02g58640
7.55457e-09	0.551789	0.315	0.064	0.000195678	Nip	LOC_Os02g54730
7.92187e-09	0.318987	0.213	0.012	0.000205192	Nip	LOC_Os05g33410
9.22568e-09	0.608386	0.921	0.744	0.000238964	Nip	LOC_Os01g47570
1.10455e-08	0.582084	0.551	0.233	0.0002861	Nip	LOC_Os05g33400
1.14079e-08	0.380092	0.961	0.878	0.000295489	Nip	LOC_Os04g51560
1.15327e-08	0.424832	0.244	0.029	0.000298721	Nip	LOC_Os06g48850
1.28384e-08	0.315195	1	0.988	0.00033254	Nip	LOC_Os04g56100
1.32697e-08	0.471506	0.787	0.512	0.000343712	Nip	LOC_Os10g14194
1.40242e-08	0.33242	0.22	0.017	0.000363255	Nip	LOC_Os12g04500
1.54651e-08	0.436669	0.504	0.203	0.000400578	Nip	LOC_Os02g57600
1.56167e-08	0.345038	0.173	0	0.000404505	Nip	LOC_Os05g13970
1.56167e-08	0.293892	0.173	0	0.000404505	Nip	LOC_Os01g05610
1.56167e-08	0.260513	0.173	0	0.000404505	Nip	LOC_Os11g29500
1.56167e-08	0.255743	0.173	0	0.000404505	Nip	LOC_Os03g63310
1.56167e-08	0.225966	0.173	0	0.000404505	Nip	LOC_Os10g02270
1.62388e-08	0.223317	0.205	0.012	0.000420617	Nip	LOC_Os01g13490
1.72813e-08	0.25034	0.205	0.012	0.00044762	Nip	LOC_Os07g35870
1.77957e-08	0.266236	0.22	0.017	0.000460944	Nip	LOC_Os09g19140
1.85151e-08	0.486728	0.567	0.244	0.000479579	Nip	LOC_Os01g61460
1.89321e-08	0.317996	0.268	0.041	0.000490379	Nip	LOC_Os08g31410
2.41655e-08	0.41098	0.425	0.14	0.000625935	Nip	LOC_Os05g39110
2.5907e-08	0.685295	0.591	0.273	0.000671042	Nip	LOC_Os05g36270
2.64784e-08	0.468292	0.906	0.692	0.000685843	Nip	LOC_Os03g62600
2.68073e-08	0.259937	0.228	0.023	0.000694364	Nip	LOC_Os06g05400
2.86284e-08	0.421504	0.929	0.738	0.000741533	Nip	LOC_Os03g53150
3.06759e-08	0.296916	0.197	0.012	0.000794568	Nip	LOC_Os01g68780
3.09273e-08	0.432252	0.37	0.099	0.000801079	Nip	LOC_Os07g48280
3.1873e-08	0.477532	0.63	0.326	0.000825574	Nip	LOC_Os08g36630
3.19197e-08	0.393823	0.315	0.076	0.000826784	Nip	LOC_Os07g42650
3.24475e-08	0.424124	0.654	0.32	0.000840455	Nip	LOC_Os03g52340
3.35797e-08	0.46687	0.236	0.029	0.00086978	Nip	LOC_Os03g55680
3.36685e-08	0.387009	0.197	0.012	0.000872082	Nip	LOC_Os02g53250
3.39784e-08	0.607968	0.417	0.145	0.000880108	Nip	LOC_Os04g18090
3.40379e-08	0.641314	0.299	0.064	0.000881649	Nip	LOC_Os06g05000
3.44367e-08	0.413355	0.362	0.105	0.000891979	Nip	LOC_Os03g50050
3.48549e-08	0.277137	0.165	0	0.000902812	Nip	LOC_Os07g13834
3.48549e-08	0.276721	0.165	0	0.000902812	Nip	LOC_Os05g13810
3.48549e-08	0.261586	0.165	0	0.000902812	Nip	LOC_Os08g43140
3.48549e-08	0.260334	0.165	0	0.000902812	Nip	LOC_Os05g39320
3.48549e-08	0.247807	0.165	0	0.000902812	Nip	LOC_Os06g33570
3.48549e-08	0.236186	0.165	0	0.000902812	Nip	LOC_Os06g38730
3.48549e-08	0.224457	0.165	0	0.000902812	Nip	LOC_Os03g22720
3.48549e-08	0.214946	0.165	0	0.000902812	Nip	LOC_Os08g42390
3.48549e-08	0.213195	0.165	0	0.000902812	Nip	LOC_Os11g28470
3.63309e-08	0.441481	0.551	0.244	0.000941042	Nip	LOC_Os07g41330
3.64612e-08	0.223657	0.181	0.006	0.000944417	Nip	LOC_Os08g13930
3.814e-08	0.412099	0.551	0.244	0.000987902	Nip	LOC_Os05g27340
3.99719e-08	0.577818	0.598	0.285	0.00103535	Nip	LOC_Os01g55940
4.67272e-08	0.456572	0.945	0.89	0.00121033	Nip	LOC_Os02g10500
4.7689e-08	0.226732	0.213	0.017	0.00123524	Nip	LOC_Os06g41840
4.89922e-08	0.474331	0.858	0.558	0.001269	Nip	LOC_Os07g44780
5.02325e-08	0.419309	0.575	0.297	0.00130112	Nip	LOC_Os01g62950
5.03934e-08	0.309933	0.205	0.017	0.00130529	Nip	LOC_Os02g56370
5.13629e-08	0.297996	0.236	0.029	0.0013304	Nip	LOC_Os12g43320
5.14312e-08	0.253701	0.268	0.047	0.00133217	Nip	LOC_Os01g47490
5.20547e-08	0.265561	0.213	0.017	0.00134832	Nip	LOC_Os06g47650
5.39769e-08	0.386795	0.669	0.355	0.00139811	Nip	LOC_Os05g04520
5.4403e-08	0.409823	0.724	0.419	0.00140915	Nip	LOC_Os03g03290
5.75349e-08	0.541223	0.772	0.547	0.00149027	Nip	LOC_Os06g45140
5.83087e-08	1.02601	0.528	0.256	0.00151031	Nip	LOC_Os02g40500
5.99395e-08	0.523761	0.913	0.82	0.00155255	Nip	LOC_Os04g45970
6.03137e-08	0.427265	0.362	0.11	0.00156224	Nip	LOC_Os08g07970
6.10641e-08	0.30822	0.205	0.017	0.00158168	Nip	LOC_Os06g18900
6.14354e-08	0.278509	0.228	0.029	0.0015913	Nip	LOC_Os01g61510
6.43524e-08	0.293713	0.189	0.012	0.00166686	Nip	LOC_Os08g13270
6.52968e-08	0.654515	0.488	0.203	0.00169132	Nip	LOC_Os10g32700
6.63824e-08	0.397588	1	0.953	0.00171944	Nip	LOC_Os11g42960
6.93967e-08	0.33455	0.362	0.105	0.00179751	Nip	LOC_Os02g36740
7.1642e-08	0.334298	0.709	0.378	0.00185567	Nip	LOC_Os11g01040
7.169e-08	0.328138	0.189	0.012	0.00185692	Nip	LOC_Os02g56460
7.31935e-08	0.210213	0.173	0.006	0.00189586	Nip	LOC_Os02g46480
7.43944e-08	0.249216	0.173	0.006	0.00192696	Nip	LOC_Os01g47550
7.74673e-08	0.329913	0.157	0	0.00200656	Nip	LOC_Os02g57350
7.74673e-08	0.297359	0.157	0	0.00200656	Nip	LOC_Os07g33784
7.74673e-08	0.285522	0.157	0	0.00200656	Nip	LOC_Os02g26790
7.74673e-08	0.243222	0.157	0	0.00200656	Nip	LOC_Os01g01295
7.74673e-08	0.228516	0.157	0	0.00200656	Nip	LOC_Os07g33997
7.74673e-08	0.226182	0.157	0	0.00200656	Nip	LOC_Os01g71630
7.74673e-08	0.224133	0.157	0	0.00200656	Nip	LOC_Os04g10214
7.74673e-08	0.212473	0.157	0	0.00200656	Nip	LOC_Os11g36200
7.8057e-08	0.34538	1	0.971	0.00202183	Nip	LOC_Os09g31200
7.81127e-08	0.212146	0.173	0.006	0.00202327	Nip	LOC_Os06g16270
8.10695e-08	0.22256	0.189	0.012	0.00209986	Nip	LOC_Os03g52450
8.32353e-08	0.576677	0.709	0.488	0.00215596	Nip	LOC_Os06g04020
8.68062e-08	0.662381	0.528	0.233	0.00224845	Nip	LOC_Os01g50840
8.69416e-08	0.254675	0.213	0.023	0.00225196	Nip	LOC_Os12g37550
9.67785e-08	0.4246	0.772	0.558	0.00250676	Nip	LOC_Os06g23440
1.03321e-07	0.229489	0.205	0.017	0.00267622	Nip	LOC_Os05g41540
1.1929e-07	0.333074	0.291	0.064	0.00308985	Nip	LOC_Os05g46200
1.25298e-07	0.305611	0.213	0.023	0.00324546	Nip	LOC_Os08g43190
1.29251e-07	0.501091	0.346	0.099	0.00334786	Nip	LOC_Os01g39860
1.3246e-07	0.330876	0.252	0.047	0.00343097	Nip	LOC_Os02g31160
1.34374e-07	0.431627	0.795	0.605	0.00348054	Nip	LOC_Os06g39470
1.4076e-07	0.211942	0.181	0.012	0.00364598	Nip	LOC_Os01g15260
1.42423e-07	0.3152	0.559	0.256	0.00368905	Nip	LOC_Os02g49590
1.52781e-07	0.349303	0.953	0.767	0.00395735	Nip	LOC_Os05g34540
1.69119e-07	0.260661	0.181	0.012	0.00438053	Nip	LOC_Os02g18180
1.71479e-07	0.330234	0.15	0	0.00444165	Nip	LOC_Os07g41850
1.71479e-07	0.29355	0.15	0	0.00444165	Nip	LOC_Os01g32460
1.71479e-07	0.219765	0.15	0	0.00444165	Nip	EVM0011292
1.71479e-07	0.208154	0.15	0	0.00444165	Nip	LOC_Os10g35100
1.71479e-07	0.20426	0.15	0	0.00444165	Nip	LOC_Os01g04710
1.71479e-07	0.202963	0.15	0	0.00444165	Nip	LOC_Os02g53330
1.80554e-07	0.421253	0.449	0.186	0.00467671	Nip	LOC_Os05g32170
1.83944e-07	0.40083	0.575	0.267	0.00476452	Nip	LOC_Os06g48040
1.84033e-07	0.438472	0.701	0.401	0.00476683	Nip	LOC_Os03g58890
1.86285e-07	0.461367	0.89	0.663	0.00482516	Nip	LOC_Os05g48010
1.92725e-07	0.228473	0.165	0.006	0.00499197	Nip	LOC_Os04g01280
1.93625e-07	0.265003	0.205	0.023	0.00501529	Nip	LOC_Os05g33940
2.09301e-07	0.524134	0.921	0.791	0.00542131	Nip	LOC_Os07g14270
2.19161e-07	0.214905	0.165	0.006	0.0056767	Nip	LOC_Os01g70320
2.1956e-07	0.404214	0.386	0.14	0.00568703	Nip	LOC_Os05g51780
2.22551e-07	0.415936	0.323	0.093	0.00576451	Nip	LOC_Os01g11480
2.22702e-07	0.212322	0.165	0.006	0.00576842	Nip	LOC_Os04g28280
2.44956e-07	0.360144	0.346	0.105	0.00634486	Nip	LOC_Os12g39310
2.46153e-07	0.510209	0.606	0.32	0.00637586	Nip	LOC_Os07g44460
2.59309e-07	0.241443	0.205	0.023	0.00671663	Nip	LOC_Os06g39880
2.79476e-07	0.474116	0.709	0.424	0.00723898	Nip	LOC_Os02g47450
2.83409e-07	0.28462	0.992	0.948	0.00734086	Nip	LOC_Os01g59440
2.85652e-07	0.372443	0.882	0.674	0.00739895	Nip	LOC_Os03g48626
2.93032e-07	0.418652	0.811	0.506	0.00759012	Nip	LOC_Os07g39510
2.97309e-07	0.384398	0.472	0.192	0.00770091	Nip	LOC_Os02g52840
3.02718e-07	0.302423	0.236	0.041	0.00784101	Nip	LOC_Os05g29974
3.08545e-07	0.275244	0.268	0.052	0.00799194	Nip	LOC_Os03g03410
3.09334e-07	0.253448	0.244	0.041	0.00801237	Nip	LOC_Os03g56000
3.10921e-07	0.403194	0.646	0.326	0.00805348	Nip	LOC_Os03g36650
3.27207e-07	0.350754	0.614	0.308	0.00847533	Nip	LOC_Os01g70170
3.28822e-07	0.236125	0.291	0.064	0.00851715	Nip	LOC_Os09g07764
3.31444e-07	0.346646	0.63	0.32	0.00858505	Nip	LOC_Os10g41510
3.58883e-07	0.26504	0.339	0.093	0.00929578	Nip	LOC_Os05g50370
3.62035e-07	0.274976	0.26	0.052	0.00937744	Nip	LOC_Os08g08110
3.64789e-07	0.290913	0.402	0.134	0.00944877	Nip	LOC_Os03g40194
3.69771e-07	0.380547	0.236	0.041	0.00957782	Nip	LOC_Os11g25990
3.78091e-07	0.246095	0.142	0	0.00979332	Nip	LOC_Os04g03164
3.78098e-07	0.25228	0.142	0	0.00979349	Nip	LOC_Os02g09840
3.78098e-07	0.217814	0.142	0	0.00979349	Nip	LOC_Os03g32499
3.78098e-07	0.209467	0.142	0	0.00979349	Nip	LOC_Os11g15230
3.78098e-07	0.205994	0.142	0	0.00979349	Nip	LOC_Os01g08069
3.78929e-07	0.271538	0.173	0.012	0.00981501	Nip	LOC_Os06g48240
3.79246e-07	0.270716	0.276	0.064	0.00982323	Nip	LOC_Os06g14390
3.79618e-07	0.33947	0.472	0.186	0.00983286	Nip	LOC_Os04g49970
3.82275e-07	0.34219	0.535	0.244	0.0099017	Nip	LOC_Os06g46270
3.83888e-07	0.429929	0.157	0.006	0.00994347	Nip	LOC_Os10g14180
3.98247e-07	0.342053	0.661	0.36	0.0103154	Nip	LOC_Os05g49260
3.99943e-07	0.337844	0.976	0.913	0.0103593	Nip	LOC_Os05g33380
4.1122e-07	0.407211	0.811	0.587	0.0106514	Nip	LOC_Os08g40510
4.11961e-07	0.413647	0.685	0.419	0.0106706	Nip	LOC_Os01g62244
4.39842e-07	0.321617	1	0.971	0.0113928	Nip	LOC_Os03g53270
4.44638e-07	0.436889	0.976	0.907	0.011517	Nip	LOC_Os05g31750
4.72006e-07	0.226204	0.213	0.029	0.0122259	Nip	LOC_Os12g28270
4.7279e-07	0.379728	0.961	0.727	0.0122462	Nip	LOC_Os09g26310
4.7825e-07	0.254803	0.276	0.058	0.0123876	Nip	LOC_Os01g65094
4.88032e-07	0.267372	0.157	0.006	0.012641	Nip	LOC_Os04g02580
4.90695e-07	0.236482	0.189	0.017	0.01271	Nip	LOC_Os10g37100
4.95205e-07	0.419311	0.969	0.895	0.0128268	Nip	LOC_Os08g33370
5.02428e-07	0.416055	0.496	0.233	0.0130139	Nip	LOC_Os05g45110
5.47946e-07	0.445871	0.858	0.599	0.0141929	Nip	LOC_Os02g48630
5.49582e-07	0.539738	0.52	0.25	0.0142353	Nip	LOC_Os07g46510
5.56225e-07	0.32215	0.339	0.093	0.0144073	Nip	LOC_Os07g17970
5.59271e-07	0.336756	0.181	0.017	0.0144862	Nip	LOC_Os10g38730
5.63794e-07	0.265549	0.197	0.023	0.0146034	Nip	LOC_Os11g35020
5.77924e-07	0.318321	0.906	0.674	0.0149694	Nip	LOC_Os01g48280
6.20336e-07	0.215977	0.197	0.023	0.0160679	Nip	LOC_Os02g39030
6.32344e-07	0.338882	0.386	0.134	0.016379	Nip	LOC_Os06g43780
7.03216e-07	0.267541	0.181	0.017	0.0182147	Nip	LOC_Os07g12900
7.0921e-07	0.289199	1	0.994	0.01837	Nip	LOC_Os06g51220
7.13914e-07	0.336137	0.685	0.378	0.0184918	Nip	LOC_Os04g57770
7.31435e-07	0.521674	0.669	0.419	0.0189456	Nip	LOC_Os07g46380
7.77675e-07	0.517428	0.394	0.14	0.0201433	Nip	LOC_Os01g24550
7.79404e-07	0.852014	0.433	0.198	0.0201881	Nip	LOC_Os03g57200
8.46093e-07	0.381421	0.331	0.105	0.0219155	Nip	LOC_Os11g34080
8.86715e-07	0.282625	0.26	0.058	0.0229677	Nip	LOC_Os07g32450
8.96814e-07	0.320446	0.26	0.058	0.0232293	Nip	LOC_Os03g61710
9.10471e-07	0.390242	0.819	0.628	0.023583	Nip	LOC_Os07g08070
9.411e-07	0.307963	0.22	0.041	0.0243764	Nip	LOC_Os07g01810
9.66855e-07	0.316169	0.189	0.023	0.0250435	Nip	LOC_Os03g57690
[truncated: 479 more rows]
