# Supplementary material for: Cell Type-Specific Differentiation Between Indica and Japonica Rice Root Tip Responses to Different Environments Based on Single-Cell RNA Sequencing
Source: Front Genet. 2021 May 17;12:659500. doi: 10.3389/fgene.2021.659500 (PMC8166412; doi:10.3389/fgene.2021.659500)
Supplement: Supplementary file 15 [file Table_8.XLS]

## Sheet: endodermis
Supplementary table 8. Differential expression genes between indica and japonica rice varieties in endodermis
p_val	avg_logFC	pct.1	pct.2	p_val_adj	cluster	gene
2.01567e-150	3.51335	1	0	5.221e-146	9311	LOC_Os06g47239
1.34504e-149	3.96361	0.996	0	3.48393e-145	9311	LOC_Os10g28170
1.34504e-149	2.43819	0.996	0	3.48393e-145	9311	LOC_Os04g42064
8.92909e-149	3.08298	0.992	0	2.31281e-144	9311	LOC_Os01g68950
8.92916e-149	2.74096	0.992	0	2.31283e-144	9311	LOC_Os01g54734
1.77632e-141	2.32506	0.956	0	4.60103e-137	9311	LOC_Os01g09214
4.39435e-139	2.81594	0.944	0	1.13822e-134	9311	LOC_Os01g48770
2.73111e-138	1.904	0.94	0	7.07413e-134	9311	LOC_Os04g37778
1.689e-137	3.4914	0.935	0	4.37484e-133	9311	LOC_Os02g48710
1.4185e-133	1.61763	0.915	0	3.67421e-129	9311	LOC_Os01g58048
1.41851e-133	1.8844	0.915	0	3.67423e-129	9311	LOC_Os02g12521
8.51664e-133	1.80746	0.911	0	2.20598e-128	9311	LOC_Os10g26834
5.08836e-132	1.82351	0.907	0	1.31799e-127	9311	LOC_Os07g42390
1.20729e-126	1.88762	0.879	0	3.12712e-122	9311	LOC_Os10g34801
1.2073e-126	2.26424	0.879	0	3.12714e-122	9311	LOC_Os04g43534
3.97018e-125	1.54136	0.871	0	1.02836e-120	9311	LOC_Os12g34389
2.26053e-124	2.05737	0.867	0	5.85522e-120	9311	LOC_Os02g52150
4.05557e-122	1.50735	0.855	0	1.05047e-117	9311	LOC_Os01g05949
4.05559e-122	1.21493	0.855	0	1.05048e-117	9311	EVM035660
2.26586e-121	1.55854	0.851	0	5.86904e-117	9311	LOC_Os11g06340
1.26003e-120	1.51278	0.847	0	3.26374e-116	9311	LOC_Os09g30412
6.97419e-120	1.96824	0.843	0	1.80645e-115	9311	LOC_Os11g10510
2.10688e-118	1.32142	0.835	0	5.45724e-114	9311	LOC_Os06g33904
1.14995e-117	1.74719	0.831	0	2.97861e-113	9311	LOC_Os05g10656
3.3786e-116	1.39638	0.823	0	8.75125e-112	9311	LOC_Os07g31300
7.67427e-112	1.34099	0.798	0	1.98779e-107	9311	LOC_Os09g17574
4.01942e-111	3.23348	0.794	0	1.04111e-106	9311	LOC_Os12g36229
5.62052e-109	1.17311	0.782	0	1.45583e-104	9311	LOC_Os08g13294
1.14534e-107	1.88051	0.839	0.044	2.96666e-103	9311	LOC_Os02g37280
2.54873e-107	2.15704	1	0.706	6.60171e-103	9311	LOC_Os02g35610
2.12227e-104	1.98194	0.996	0.54	5.4971e-100	9311	LOC_Os07g12200
2.43266e-103	1.83772	0.75	0	6.30108e-99	9311	LOC_Os06g51530
2.43268e-103	1.20197	0.75	0	6.30112e-99	9311	LOC_Os10g34803
5.97025e-102	1.31735	0.742	0	1.54642e-97	9311	LOC_Os08g10504
1.43985e-100	1.43422	0.734	0	3.72949e-96	9311	LOC_Os08g03584
7.02497e-100	2.03553	0.73	0	1.81961e-95	9311	LOC_Os08g24200
3.4127e-99	1.77179	0.726	0	8.83956e-95	9311	EVM024455
1.65071e-98	0.895954	0.722	0	4.27566e-94	9311	LOC_Os06g39902
7.95017e-98	1.23604	0.718	0	2.05925e-93	9311	LOC_Os11g10045
5.6081e-97	1.65997	0.855	0.128	1.45261e-92	9311	LOC_Os01g22010
8.65601e-96	1.07096	0.706	0	2.24208e-91	9311	LOC_Os02g10374
3.21299e-95	1.5993	0.96	0.477	8.32229e-91	9311	LOC_Os02g08180
4.09818e-95	1.76181	0.702	0	1.06151e-90	9311	LOC_Os03g47059
4.60118e-95	1.63394	0.907	0.168	1.1918e-90	9311	LOC_Os06g05410
1.93205e-94	0.853778	0.698	0	5.00438e-90	9311	LOC_Os10g29559
3.71619e-94	1.1562	0.827	0.09	9.62567e-90	9311	LOC_Os01g64630
9.07003e-94	1.94831	0.694	0	2.34932e-89	9311	LOC_Os06g05034
4.23992e-93	1.10726	0.69	0	1.09822e-88	9311	LOC_Os01g40189
5.17697e-93	1.35042	0.694	0.002	1.34094e-88	9311	LOC_Os02g08330
7.42711e-92	3.21838	0.738	0.032	1.92377e-87	9311	LOC_Os04g46820
2.24396e-91	1.53398	0.927	0.34	5.81229e-87	9311	LOC_Os06g08564
2.40751e-90	1.05941	0.734	0.034	6.23593e-86	9311	LOC_Os02g51500
4.02361e-89	1.5386	0.996	0.958	1.0422e-84	9311	LOC_Os07g39680
8.61644e-89	1.06993	0.75	0.053	2.23183e-84	9311	LOC_Os02g48190
1.48782e-88	0.951529	0.685	0.013	3.85375e-84	9311	LOC_Os03g60950
1.83944e-88	0.99593	0.661	0	4.76451e-84	9311	LOC_Os07g23696
1.67914e-86	0.803498	0.649	0	4.3493e-82	9311	EVM029068
7.49862e-86	0.850987	0.645	0	1.94229e-81	9311	LOC_Os01g01704
3.33512e-85	1.4678	0.641	0	8.63863e-81	9311	LOC_Os03g58464
3.33512e-85	1.28061	0.641	0	8.63863e-81	9311	LOC_Os05g02310
3.61065e-85	0.807387	0.681	0.021	9.35231e-81	9311	LOC_Os09g36100
1.47729e-84	1.64192	0.637	0	3.82648e-80	9311	LOC_Os04g49249
6.51713e-84	0.915337	0.633	0	1.68807e-79	9311	LOC_Os01g39923
6.51713e-84	0.8907	0.633	0	1.68807e-79	9311	LOC_Os11g23824
1.25302e-82	1.25242	0.625	0	3.24558e-78	9311	LOC_Os04g37769
5.46113e-82	1.32767	0.621	0	1.41454e-77	9311	LOC_Os05g12481
1.41156e-81	1.80742	0.907	0.378	3.65622e-77	9311	LOC_Os01g28790
2.37061e-81	1.20299	0.617	0	6.14035e-77	9311	LOC_Os02g43644
3.8456e-81	2.50062	0.952	0.555	9.96087e-77	9311	LOC_Os01g05064
1.02494e-80	1.08366	0.613	0	2.65479e-76	9311	LOC_Os03g25164
1.02494e-80	1.03947	0.613	0	2.65479e-76	9311	LOC_Os06g48749
4.41364e-80	1.64402	0.609	0	1.14322e-75	9311	LOC_Os01g62113
4.41364e-80	1.07464	0.609	0	1.14322e-75	9311	LOC_Os01g24280
4.41364e-80	0.886228	0.609	0	1.14322e-75	9311	LOC_Os02g05329
4.4671e-80	1.57676	0.891	0.303	1.15707e-75	9311	LOC_Os01g70470
1.89307e-79	1.2061	0.605	0	4.90342e-75	9311	LOC_Os03g31130
2.24408e-79	1.16216	0.847	0.208	5.81262e-75	9311	LOC_Os02g10070
8.0874e-79	0.835916	0.601	0	2.0948e-74	9311	LOC_Os05g43245
3.32243e-78	1.03176	0.601	0.002	8.60575e-74	9311	LOC_Os05g46845
3.40427e-78	1.30674	0.948	0.481	8.81773e-74	9311	LOC_Os04g58110
3.44136e-78	0.784651	0.597	0	8.91381e-74	9311	LOC_Os09g07615
6.81249e-77	0.919737	0.605	0.008	1.76457e-72	9311	LOC_Os11g06240
1.08467e-75	0.858106	0.581	0	2.8095e-71	9311	LOC_Os05g01799
7.11642e-75	1.27997	0.895	0.431	1.8433e-70	9311	LOC_Os01g52214
1.88094e-74	0.770845	0.573	0	4.87201e-70	9311	LOC_Os03g50969
7.78717e-74	1.08695	0.569	0	2.01703e-69	9311	EVM021130
1.26199e-72	1.02019	0.786	0.191	3.26882e-68	9311	LOC_Os07g07240
3.74257e-72	0.957252	0.738	0.107	9.69401e-68	9311	LOC_Os01g07760
1.10506e-71	1.15449	0.698	0.086	2.86232e-67	9311	LOC_Os10g04020
7.11942e-71	1.86692	0.923	0.544	1.84407e-66	9311	LOC_Os02g36530
1.03427e-70	1.84587	0.923	0.59	2.67897e-66	9311	LOC_Os11g41875
3.61598e-70	0.796139	0.544	0	9.36611e-66	9311	LOC_Os08g20594
1.45729e-69	0.770953	0.54	0	3.77467e-65	9311	LOC_Os01g42016
2.34016e-68	1.10525	0.532	0	6.06147e-64	9311	LOC_Os08g05964
2.34016e-68	0.790909	0.532	0	6.06147e-64	9311	LOC_Os01g41124
9.32459e-68	0.706496	0.528	0	2.41526e-63	9311	LOC_Os01g67824
9.3331e-68	1.00618	0.556	0.013	2.41746e-63	9311	LOC_Os06g41940
5.76746e-66	0.799381	0.516	0	1.49389e-61	9311	LOC_Os04g52464
5.76749e-66	0.682358	0.516	0	1.4939e-61	9311	LOC_Os11g46860
2.26185e-65	1.17927	0.669	0.09	5.85863e-61	9311	LOC_Os09g34020
2.26388e-65	0.671713	0.512	0	5.8639e-61	9311	LOC_Os09g30254
1.20754e-64	1.01608	0.984	0.87	3.12778e-60	9311	LOC_Os01g46926
1.36492e-64	1.00655	0.843	0.332	3.53541e-60	9311	LOC_Os08g02420
2.93331e-64	1.16178	0.819	0.309	7.59785e-60	9311	LOC_Os06g21550
3.44941e-64	0.633097	0.504	0	8.93467e-60	9311	LOC_Os03g46219
3.97307e-64	1.21882	0.919	0.508	1.02911e-59	9311	LOC_Os08g44340
1.33898e-63	0.976568	0.5	0	3.46822e-59	9311	LOC_Os10g38189
5.17848e-63	0.655756	0.496	0	1.34133e-58	9311	LOC_Os03g19049
1.03403e-62	0.920492	0.71	0.139	2.67836e-58	9311	LOC_Os06g43210
1.27603e-62	1.45082	0.968	0.716	3.30519e-58	9311	LOC_Os06g21410
1.66064e-62	1.67012	0.919	0.521	4.30138e-58	9311	LOC_Os06g07580
1.9954e-62	0.798213	0.492	0	5.16849e-58	9311	LOC_Os12g43504
1.9954e-62	0.574909	0.492	0	5.16849e-58	9311	LOC_Os01g57119
8.52536e-62	1.34137	0.988	0.92	2.20824e-57	9311	LOC_Os05g05940
8.72246e-62	1.14566	0.903	0.58	2.25929e-57	9311	LOC_Os05g14180
1.81667e-61	0.863906	0.738	0.193	4.70554e-57	9311	LOC_Os09g38750
2.93025e-61	0.692245	0.484	0	7.58994e-57	9311	LOC_Os02g45820
2.93025e-61	0.650761	0.484	0	7.58994e-57	9311	LOC_Os12g34045
2.93027e-61	1.99671	0.484	0	7.58998e-57	9311	LOC_Os12g38689
2.93027e-61	0.815146	0.484	0	7.58998e-57	9311	LOC_Os10g39406
5.90544e-61	0.825746	0.581	0.053	1.52963e-56	9311	LOC_Os02g32469
1.05407e-60	1.4482	0.935	0.653	2.73024e-56	9311	LOC_Os08g37370
1.11678e-60	0.648867	0.48	0	2.89267e-56	9311	LOC_Os01g43639
4.24075e-60	0.478648	0.476	0	1.09844e-55	9311	EVM014147
4.24077e-60	0.688943	0.476	0	1.09844e-55	9311	LOC_Os05g08356
2.76973e-59	1.0512	0.786	0.244	7.17415e-55	9311	LOC_Os03g57900
3.10954e-59	1.50833	0.613	0.08	8.05433e-55	9311	LOC_Os06g04889
2.27219e-58	0.686555	0.464	0	5.88542e-54	9311	EVM019481
2.27219e-58	0.536187	0.464	0	5.88542e-54	9311	LOC_Os12g15884
3.91615e-58	1.31689	0.653	0.13	1.01436e-53	9311	LOC_Os07g38290
8.50446e-58	0.540956	0.46	0	2.20282e-53	9311	LOC_Os01g73011
8.50446e-58	0.472571	0.46	0	2.20282e-53	9311	LOC_Os06g50818
1.38553e-57	1.01592	0.923	0.588	3.58881e-53	9311	LOC_Os11g02200
2.35326e-57	0.854337	0.782	0.254	6.09542e-53	9311	LOC_Os01g65900
3.1717e-57	0.859451	0.456	0	8.21534e-53	9311	LOC_Os11g31070
3.1717e-57	0.57794	0.456	0	8.21534e-53	9311	LOC_Os05g40779
9.13692e-57	0.536897	0.46	0.002	2.36665e-52	9311	LOC_Os09g08910
1.38683e-56	1.36888	0.948	0.704	3.59217e-52	9311	LOC_Os01g04330
1.99331e-56	0.77876	0.565	0.057	5.16307e-52	9311	LOC_Os05g08370
3.9836e-56	0.748497	0.492	0.017	1.03183e-51	9311	LOC_Os03g22270
1.03178e-55	0.746862	0.661	0.12	2.67252e-51	9311	LOC_Os02g47580
5.92095e-55	0.685456	0.44	0	1.53364e-50	9311	LOC_Os07g44004
1.6229e-54	1.0304	0.931	0.666	4.20363e-50	9311	LOC_Os05g03760
2.16929e-54	0.649829	0.435	0	5.6189e-50	9311	LOC_Os06g50420
2.16929e-54	0.515455	0.435	0	5.6189e-50	9311	LOC_Os06g40415
2.2534e-54	0.61196	0.476	0.017	5.83676e-50	9311	LOC_Os01g56300
2.60039e-54	1.40648	0.972	0.765	6.73552e-50	9311	LOC_Os07g44180
7.91982e-54	0.545201	0.431	0	2.05139e-49	9311	LOC_Os02g57919
1.49123e-53	0.585616	0.5	0.029	3.86259e-49	9311	LOC_Os03g29350
6.46605e-53	1.12652	0.851	0.504	1.67484e-48	9311	LOC_Os01g46610
1.04457e-52	0.585234	0.423	0	2.70565e-48	9311	LOC_Os10g24006
7.07635e-52	0.654523	0.435	0.006	1.83292e-47	9311	LOC_Os02g26770
9.56827e-52	0.729125	1	1	2.47837e-47	9311	LOC_Os03g40920
1.35861e-51	1.59073	0.415	0	3.51908e-47	9311	LOC_Os03g02771
1.46844e-51	1.21106	0.911	0.511	3.80355e-47	9311	LOC_Os03g08050
1.74702e-51	1.44446	0.972	0.878	4.52513e-47	9311	LOC_Os06g13190
4.87429e-51	0.649353	0.411	0	1.26254e-46	9311	LOC_Os10g02380
4.87429e-51	0.593288	0.411	0	1.26254e-46	9311	LOC_Os08g41210
4.87429e-51	0.519487	0.411	0	1.26254e-46	9311	LOC_Os12g12334
4.87429e-51	0.466393	0.411	0	1.26254e-46	9311	EVM030255
1.73768e-50	1.65533	0.984	0.899	4.50093e-46	9311	LOC_Os04g52504
1.74271e-50	0.823445	0.407	0	4.51396e-46	9311	LOC_Os02g57354
1.90626e-50	0.734155	0.621	0.12	4.93759e-46	9311	LOC_Os08g44820
6.20926e-50	0.816405	0.403	0	1.60832e-45	9311	LOC_Os07g49116
6.20926e-50	0.717614	0.403	0	1.60832e-45	9311	LOC_Os01g64644
6.20926e-50	0.640312	0.403	0	1.60832e-45	9311	LOC_Os03g31140
6.30303e-50	0.802549	0.625	0.141	1.63261e-45	9311	LOC_Os03g37090
1.18044e-49	0.575535	0.423	0.008	3.05758e-45	9311	LOC_Os02g53040
2.20476e-49	0.598282	0.399	0	5.71078e-45	9311	LOC_Os04g39994
2.65719e-49	1.07444	0.827	0.435	6.88265e-45	9311	LOC_Os06g39912
3.02821e-49	1.16242	0.77	0.351	7.84368e-45	9311	LOC_Os03g49600
9.64146e-49	0.52144	0.46	0.027	2.49733e-44	9311	LOC_Os04g50216
1.80921e-48	0.603109	0.52	0.059	4.68622e-44	9311	LOC_Os02g38080
2.55686e-48	0.749888	0.581	0.118	6.62279e-44	9311	LOC_Os01g49026
5.11107e-48	0.713038	0.56	0.084	1.32387e-43	9311	LOC_Os02g48210
5.33037e-48	0.605066	0.532	0.065	1.38067e-43	9311	LOC_Os06g49700
9.66971e-48	0.471095	0.387	0	2.50465e-43	9311	LOC_Os09g38079
3.38694e-47	0.480122	0.383	0	8.77286e-43	9311	EVM020659
4.47844e-47	1.22473	0.839	0.5	1.16001e-42	9311	LOC_Os03g60080
4.11329e-46	0.603577	0.375	0	1.06542e-41	9311	LOC_Os01g03136
4.11329e-46	0.398869	0.375	0	1.06542e-41	9311	EVM021700
4.13174e-46	1.3867	0.794	0.382	1.0702e-41	9311	LOC_Os01g57570
4.81332e-46	1.31057	0.919	0.7	1.24675e-41	9311	LOC_Os06g46950
4.92117e-46	0.484314	0.435	0.023	1.27468e-41	9311	LOC_Os04g42480
9.174e-46	0.978064	0.573	0.128	2.37625e-41	9311	LOC_Os06g37070
7.92413e-45	0.528164	0.456	0.038	2.05251e-40	9311	LOC_Os03g06620
1.69751e-44	0.509026	0.363	0	4.3969e-40	9311	LOC_Os08g32170
3.99898e-44	0.882829	0.73	0.313	1.03582e-39	9311	LOC_Os12g29340
4.17609e-44	1.41072	0.851	0.429	1.08169e-39	9311	LOC_Os03g56860
4.59585e-44	0.85175	0.714	0.275	1.19042e-39	9311	LOC_Os12g06870
4.72701e-44	0.952109	0.488	0.061	1.22439e-39	9311	LOC_Os08g42590
6.12711e-44	1.4993	0.609	0.137	1.58704e-39	9311	LOC_Os11g30910
6.43819e-44	0.4858	0.427	0.027	1.66762e-39	9311	LOC_Os01g66350
1.96224e-43	0.760033	0.722	0.256	5.08259e-39	9311	LOC_Os09g13920
1.99366e-43	0.503372	0.355	0	5.16398e-39	9311	LOC_Os03g54621
1.99366e-43	0.379233	0.355	0	5.16398e-39	9311	LOC_Os02g34729
2.65279e-43	0.445106	0.427	0.029	6.87126e-39	9311	LOC_Os01g14860
6.78044e-43	0.574235	0.488	0.071	1.75627e-38	9311	LOC_Os07g43060
6.79846e-43	0.542208	0.351	0	1.76094e-38	9311	LOC_Os07g39360
6.84204e-43	1.37139	0.859	0.536	1.77222e-38	9311	LOC_Os01g58310
2.31066e-42	0.368778	0.347	0	5.98508e-38	9311	LOC_Os08g38410
3.57121e-42	0.457674	0.411	0.025	9.25015e-38	9311	LOC_Os06g12390
6.88573e-42	0.60427	0.508	0.086	1.78354e-37	9311	LOC_Os11g41140
7.19115e-42	0.757208	0.855	0.571	1.86265e-37	9311	LOC_Os01g37800
7.2065e-42	0.619619	0.677	0.231	1.86663e-37	9311	LOC_Os02g56560
7.82768e-42	0.405092	0.343	0	2.02753e-37	9311	LOC_Os02g58324
7.82768e-42	0.397759	0.343	0	2.02753e-37	9311	EVM031447
1.99578e-41	1.11924	0.879	0.5	5.16947e-37	9311	LOC_Os05g02770
2.64305e-41	0.330091	0.339	0	6.84603e-37	9311	LOC_Os06g21854
3.62152e-41	0.496009	0.452	0.048	9.38046e-37	9311	LOC_Os11g10760
6.04383e-41	0.980411	0.81	0.513	1.56547e-36	9311	LOC_Os03g60090
1.37637e-40	0.676266	0.516	0.09	3.56507e-36	9311	LOC_Os05g24010
2.56209e-40	0.757534	0.992	0.977	6.63633e-36	9311	LOC_Os02g06640
2.98397e-40	0.389789	0.331	0	7.72909e-36	9311	LOC_Os12g29208
2.98399e-40	0.432687	0.331	0	7.72912e-36	9311	LOC_Os05g43629
2.98399e-40	0.371823	0.331	0	7.72912e-36	9311	LOC_Os02g05245
5.60902e-40	1.02227	0.774	0.395	1.45285e-35	9311	LOC_Os05g30510
6.25244e-40	0.757631	0.823	0.54	1.61951e-35	9311	LOC_Os09g39550
9.97758e-40	0.325347	0.327	0	2.58439e-35	9311	LOC_Os07g10246
3.70336e-39	0.769466	0.927	0.777	9.59244e-35	9311	LOC_Os08g37444
4.80254e-39	1.61397	0.903	0.574	1.24395e-34	9311	LOC_Os11g41150
4.87777e-39	0.409233	0.363	0.015	1.26344e-34	9311	LOC_Os04g51950
8.67713e-39	1.06188	0.56	0.124	2.24755e-34	9311	LOC_Os04g05650
1.09764e-38	0.597388	0.476	0.082	2.8431e-34	9311	LOC_Os08g34480
1.10476e-38	0.467576	0.319	0	2.86156e-34	9311	EVM036215
3.65844e-38	0.419211	0.315	0	9.47609e-34	9311	LOC_Os01g04619
1.12999e-37	1.16542	0.81	0.464	2.9269e-33	9311	LOC_Os03g52410
1.20762e-37	0.576726	0.31	0	3.12797e-33	9311	LOC_Os03g40069
1.20762e-37	0.438362	0.31	0	3.12798e-33	9311	LOC_Os02g24579
1.20762e-37	0.426303	0.31	0	3.12798e-33	9311	LOC_Os07g35180
1.20762e-37	0.390127	0.31	0	3.12798e-33	9311	LOC_Os05g11005
1.20762e-37	0.385626	0.31	0	3.12798e-33	9311	LOC_Os10g13836
1.20762e-37	0.294445	0.31	0	3.12798e-33	9311	LOC_Os02g01360
1.27663e-37	0.837396	0.754	0.38	3.30672e-33	9311	LOC_Os04g42600
3.97356e-37	0.460813	0.306	0	1.02923e-32	9311	EVM016332
3.97356e-37	0.359825	0.306	0	1.02923e-32	9311	LOC_Os06g05464
6.2888e-37	0.588594	0.391	0.034	1.62892e-32	9311	LOC_Os03g62480
6.7411e-37	1.54599	0.46	0.069	1.74608e-32	9311	LOC_Os04g28250
7.58126e-37	1.52416	0.815	0.513	1.9637e-32	9311	LOC_Os06g05510
7.59735e-37	0.62618	0.46	0.078	1.96787e-32	9311	LOC_Os05g44170
1.30331e-36	0.447305	0.302	0	3.37583e-32	9311	LOC_Os03g06710
2.19688e-36	1.17005	0.895	0.7	5.69035e-32	9311	LOC_Os11g11970
2.25465e-36	0.814103	0.702	0.294	5.83999e-32	9311	LOC_Os01g42380
4.26125e-36	0.360089	0.298	0	1.10375e-31	9311	LOC_Os12g34012
4.59071e-36	1.0364	0.73	0.33	1.18909e-31	9311	LOC_Os10g38580
4.84432e-36	0.389637	0.391	0.038	1.25478e-31	9311	LOC_Os05g04340
1.38885e-35	0.373844	0.294	0	3.59741e-31	9311	LOC_Os06g15754
1.38885e-35	0.344744	0.294	0	3.59741e-31	9311	LOC_Os04g17664
2.18125e-35	0.690937	0.516	0.111	5.64987e-31	9311	LOC_Os05g04470
2.36726e-35	0.794651	0.56	0.179	6.13168e-31	9311	LOC_Os02g57830
2.80195e-35	1.43723	0.778	0.458	7.25761e-31	9311	LOC_Os02g53410
4.08565e-35	0.841024	0.625	0.242	1.05827e-30	9311	LOC_Os07g48780
4.51241e-35	0.688686	0.29	0	1.1688e-30	9311	LOC_Os05g10330
4.51241e-35	0.316801	0.29	0	1.1688e-30	9311	LOC_Os04g32043
4.56486e-35	0.990381	0.456	0.082	1.18239e-30	9311	LOC_Os04g52750
5.85105e-35	0.659866	0.597	0.197	1.51554e-30	9311	LOC_Os12g39640
6.28445e-35	0.892487	0.347	0.023	1.6278e-30	9311	LOC_Os11g10590
7.9106e-35	1.04767	0.992	0.918	2.049e-30	9311	LOC_Os01g32670
1.21569e-34	0.782232	0.923	0.765	3.14889e-30	9311	LOC_Os03g01910
1.34869e-34	1.13711	0.577	0.187	3.49338e-30	9311	LOC_Os01g52230
1.4615e-34	0.419997	0.286	0	3.78558e-30	9311	LOC_Os02g53320
1.4615e-34	0.296589	0.286	0	3.78558e-30	9311	LOC_Os06g08005
1.61845e-34	0.44189	0.383	0.042	4.19212e-30	9311	LOC_Os01g03760
1.66514e-34	0.859818	0.44	0.071	4.31306e-30	9311	LOC_Os07g39210
1.75355e-34	0.696494	0.589	0.208	4.54203e-30	9311	LOC_Os09g39350
2.11915e-34	0.57606	0.46	0.086	5.48902e-30	9311	LOC_Os08g44370
2.39242e-34	0.675681	0.673	0.256	6.19684e-30	9311	LOC_Os02g39400
2.62788e-34	0.386007	0.371	0.034	6.80672e-30	9311	LOC_Os02g07680
3.05312e-34	0.55843	0.496	0.118	7.9082e-30	9311	LOC_Os03g62280
4.71881e-34	0.340905	0.282	0	1.22227e-29	9311	EVM020102
9.42327e-34	0.29926	0.319	0.013	2.44082e-29	9311	LOC_Os12g41700
9.62772e-34	0.419966	0.419	0.059	2.49377e-29	9311	LOC_Os01g51280
1.07494e-33	0.789363	0.923	0.872	2.78432e-29	9311	LOC_Os01g58220
1.51885e-33	0.702627	0.278	0	3.93412e-29	9311	LOC_Os03g35873
1.51885e-33	0.392489	0.278	0	3.93412e-29	9311	LOC_Os04g49660
1.51885e-33	0.329831	0.278	0	3.93412e-29	9311	LOC_Os08g02905
1.93749e-33	1.14598	0.629	0.239	5.01848e-29	9311	LOC_Os03g28330
1.97411e-33	0.620292	0.516	0.12	5.11334e-29	9311	LOC_Os04g51940
2.65747e-33	0.302123	0.282	0.002	6.88338e-29	9311	LOC_Os04g37890
4.02209e-33	0.949219	0.71	0.305	1.0418e-28	9311	LOC_Os05g32860
4.18955e-33	0.672658	0.548	0.164	1.08518e-28	9311	LOC_Os06g43810
4.61707e-33	0.291355	0.282	0.002	1.19591e-28	9311	LOC_Os02g09920
4.8736e-33	0.484122	0.274	0	1.26236e-28	9311	LOC_Os04g51152
4.8736e-33	0.33644	0.274	0	1.26236e-28	9311	LOC_Os08g16809
4.8736e-33	0.3195	0.274	0	1.26236e-28	9311	LOC_Os05g49270
4.8736e-33	0.295511	0.274	0	1.26236e-28	9311	LOC_Os01g46709
6.5957e-33	0.400357	0.331	0.021	1.70842e-28	9311	LOC_Os03g31570
7.44942e-33	0.973333	0.633	0.263	1.92955e-28	9311	LOC_Os07g12650
1.55898e-32	0.418891	0.27	0	4.03808e-28	9311	LOC_Os03g64264
1.55899e-32	0.354656	0.27	0	4.0381e-28	9311	LOC_Os08g37500
1.55899e-32	0.277758	0.27	0	4.0381e-28	9311	LOC_Os03g62808
4.78199e-32	0.754945	0.569	0.21	1.23863e-27	9311	LOC_Os05g01600
4.97165e-32	0.420664	0.266	0	1.28776e-27	9311	LOC_Os11g16296
4.97165e-32	0.283793	0.266	0	1.28776e-27	9311	LOC_Os02g04340
6.81822e-32	0.368466	0.359	0.036	1.76606e-27	9311	LOC_Os10g34270
7.48605e-32	0.801575	0.79	0.494	1.93904e-27	9311	LOC_Os08g31280
1.06625e-31	0.594431	0.407	0.067	2.7618e-27	9311	LOC_Os03g25610
1.58062e-31	0.328248	0.262	0	4.09411e-27	9311	LOC_Os01g18860
1.58062e-31	0.318866	0.262	0	4.09411e-27	9311	LOC_Os02g46424
1.58062e-31	0.316373	0.262	0	4.09411e-27	9311	LOC_Os11g42989
2.06092e-31	0.356663	0.274	0.004	5.3382e-27	9311	LOC_Os09g16520
2.23241e-31	0.662581	0.577	0.229	5.7824e-27	9311	LOC_Os03g61330
2.28083e-31	0.447767	0.504	0.132	5.9078e-27	9311	LOC_Os03g29910
3.16016e-31	0.720315	0.972	0.817	8.18544e-27	9311	LOC_Os04g37710
3.45862e-31	0.441787	0.351	0.036	8.95852e-27	9311	LOC_Os01g72100
3.74655e-31	0.361195	0.327	0.025	9.70433e-27	9311	LOC_Os11g05870
4.13663e-31	0.729899	1	1	1.07147e-26	9311	LOC_Os03g30430
5.00987e-31	0.447547	0.258	0	1.29766e-26	9311	LOC_Os11g12093
5.00987e-31	0.330175	0.258	0	1.29766e-26	9311	LOC_Os03g19959
5.00987e-31	0.269954	0.258	0	1.29766e-26	9311	LOC_Os09g35560
5.69153e-31	0.459424	0.423	0.074	1.47422e-26	9311	LOC_Os01g09570
9.59757e-31	0.537307	0.552	0.176	2.48596e-26	9311	LOC_Os04g49510
1.17313e-30	1.03382	0.734	0.324	3.03863e-26	9311	LOC_Os07g41340
1.58309e-30	0.322082	0.254	0	4.10052e-26	9311	LOC_Os10g40390
1.58309e-30	0.299858	0.254	0	4.10052e-26	9311	LOC_Os04g35226
1.59496e-30	0.484977	0.371	0.05	4.13127e-26	9311	LOC_Os01g56570
2.34458e-30	0.964613	0.419	0.082	6.07294e-26	9311	LOC_Os08g39300
4.23582e-30	0.675662	0.681	0.328	1.09716e-25	9311	LOC_Os08g38220
4.9424e-30	0.785599	0.839	0.574	1.28018e-25	9311	LOC_Os12g32580
4.98735e-30	0.26166	0.25	0	1.29182e-25	9311	LOC_Os05g07729
1.04108e-29	0.773153	0.891	0.687	2.69662e-25	9311	LOC_Os07g37400
1.09962e-29	0.299437	0.294	0.017	2.84823e-25	9311	LOC_Os12g04020
1.24362e-29	0.881146	0.883	0.681	3.22121e-25	9311	LOC_Os02g37300
1.43921e-29	0.910466	0.641	0.311	3.72784e-25	9311	LOC_Os12g38650
1.56647e-29	0.326879	0.246	0	4.05747e-25	9311	LOC_Os11g44674
1.56647e-29	0.299748	0.246	0	4.05747e-25	9311	LOC_Os08g06344
1.56648e-29	0.338115	0.246	0	4.05749e-25	9311	LOC_Os03g42464
1.56648e-29	0.28734	0.246	0	4.05749e-25	9311	LOC_Os10g02936
1.56648e-29	0.274723	0.246	0	4.05749e-25	9311	LOC_Os03g36931
1.56648e-29	0.270474	0.246	0	4.05749e-25	9311	LOC_Os04g55250
1.56648e-29	0.253051	0.246	0	4.05749e-25	9311	LOC_Os07g17834
1.56648e-29	0.248305	0.246	0	4.05749e-25	9311	LOC_Os02g26619
1.6822e-29	0.630602	0.661	0.303	4.35723e-25	9311	LOC_Os02g39790
1.71757e-29	0.60135	0.637	0.282	4.44886e-25	9311	LOC_Os01g43420
1.97833e-29	0.584173	0.528	0.162	5.12427e-25	9311	LOC_Os01g51410
2.72414e-29	0.484237	0.456	0.107	7.05606e-25	9311	LOC_Os02g47570
4.9054e-29	0.351383	0.242	0	1.2706e-24	9311	LOC_Os04g56417
4.9054e-29	0.31355	0.242	0	1.2706e-24	9311	LOC_Os01g03069
4.9054e-29	0.256227	0.242	0	1.2706e-24	9311	LOC_Os03g19704
4.9054e-29	0.249842	0.242	0	1.2706e-24	9311	LOC_Os01g26996
7.26691e-29	0.279201	0.266	0.008	1.88227e-24	9311	LOC_Os01g51420
9.04166e-29	0.322806	0.27	0.011	2.34197e-24	9311	LOC_Os04g40874
1.32296e-28	0.534135	0.415	0.088	3.42672e-24	9311	LOC_Os03g55670
1.37354e-28	0.292961	0.306	0.025	3.55775e-24	9311	LOC_Os02g47220
1.53153e-28	0.304348	0.238	0	3.96698e-24	9311	EVM014237
1.53153e-28	0.266355	0.238	0	3.96698e-24	9311	LOC_Os01g02034
1.53153e-28	0.22504	0.238	0	3.96698e-24	9311	LOC_Os06g50090
1.69198e-28	0.718229	0.476	0.149	4.38257e-24	9311	LOC_Os07g33860
4.76744e-28	0.373349	0.234	0	1.23486e-23	9311	LOC_Os04g56044
4.76744e-28	0.299893	0.234	0	1.23486e-23	9311	LOC_Os06g48520
4.76744e-28	0.280715	0.234	0	1.23486e-23	9311	LOC_Os03g28180
4.76744e-28	0.223842	0.234	0	1.23486e-23	9311	LOC_Os05g34240
4.76744e-28	0.209217	0.234	0	1.23486e-23	9311	LOC_Os11g21543
6.48595e-28	0.694173	0.565	0.218	1.67999e-23	9311	LOC_Os01g12464
6.59995e-28	1.05816	0.931	0.819	1.70952e-23	9311	LOC_Os11g10470
8.54684e-28	0.52858	0.548	0.212	2.2138e-23	9311	LOC_Os04g56800
1.12084e-27	0.916925	0.73	0.466	2.9032e-23	9311	LOC_Os02g52314
1.47964e-27	0.802288	0.23	0	3.83257e-23	9311	LOC_Os01g27609
1.47964e-27	0.328846	0.23	0	3.83257e-23	9311	LOC_Os10g38562
1.47964e-27	0.275493	0.23	0	3.83257e-23	9311	LOC_Os08g18829
1.47964e-27	0.218031	0.23	0	3.83257e-23	9311	LOC_Os03g38720
1.65295e-27	0.373664	0.319	0.036	4.28148e-23	9311	LOC_Os07g47460
2.16151e-27	0.375798	0.29	0.021	5.59874e-23	9311	LOC_Os01g53350
2.71848e-27	0.444481	0.246	0.006	7.04142e-23	9311	LOC_Os01g55320
3.25234e-27	0.622226	0.669	0.34	8.4242e-23	9311	LOC_Os12g25210
3.63854e-27	0.374329	0.278	0.019	9.42454e-23	9311	LOC_Os10g25150
3.7571e-27	0.692323	0.492	0.151	9.73163e-23	9311	LOC_Os01g64790
3.80868e-27	0.283832	0.286	0.021	9.86523e-23	9311	LOC_Os01g05810
4.57875e-27	0.27888	0.226	0	1.18599e-22	9311	LOC_Os04g50950
4.57875e-27	0.245806	0.226	0	1.18599e-22	9311	LOC_Os12g40529
4.57875e-27	0.223085	0.226	0	1.18599e-22	9311	EVM022699
4.57875e-27	0.219294	0.226	0	1.18599e-22	9311	LOC_Os05g43059
5.5005e-27	0.3616	0.375	0.065	1.42474e-22	9311	LOC_Os02g01240
5.70885e-27	0.393776	0.411	0.082	1.47871e-22	9311	LOC_Os06g50870
1.11871e-26	0.287526	0.254	0.011	2.89768e-22	9311	LOC_Os06g44890
1.41273e-26	0.203127	0.222	0	3.65925e-22	9311	LOC_Os01g25274
1.41274e-26	0.403921	0.222	0	3.65928e-22	9311	EVM037029
1.41274e-26	0.355753	0.222	0	3.65928e-22	9311	LOC_Os01g33204
1.41274e-26	0.267682	0.222	0	3.65928e-22	9311	LOC_Os03g43989
1.41274e-26	0.232555	0.222	0	3.65928e-22	9311	LOC_Os08g05934
1.41274e-26	0.210471	0.222	0	3.65928e-22	9311	LOC_Os10g02632
1.76203e-26	0.385859	0.415	0.103	4.56402e-22	9311	LOC_Os05g04850
1.87139e-26	0.607736	0.629	0.263	4.84727e-22	9311	LOC_Os08g34240
2.94404e-26	0.400147	0.238	0.006	7.62566e-22	9311	LOC_Os11g47330
3.06354e-26	0.238883	0.226	0.002	7.93518e-22	9311	LOC_Os11g01510
3.60521e-26	0.516016	0.56	0.237	9.33822e-22	9311	LOC_Os07g38970
4.41117e-26	0.606838	0.536	0.206	1.14258e-21	9311	LOC_Os02g48670
4.52629e-26	0.238543	0.25	0.011	1.1724e-21	9311	LOC_Os02g48340
4.6526e-26	0.817849	0.52	0.185	1.20512e-21	9311	LOC_Os09g35010
8.20667e-26	0.533456	0.633	0.277	2.12569e-21	9311	LOC_Os05g50810
9.66754e-26	0.441218	0.444	0.12	2.50409e-21	9311	LOC_Os03g43400
1.10941e-25	0.564816	0.492	0.166	2.8736e-21	9311	LOC_Os10g28210
1.33319e-25	0.350975	0.214	0	3.45322e-21	9311	LOC_Os01g61849
1.33319e-25	0.306717	0.214	0	3.45322e-21	9311	EVM019851
1.33319e-25	0.235212	0.214	0	3.45322e-21	9311	LOC_Os03g16369
1.33319e-25	0.228081	0.214	0	3.45322e-21	9311	LOC_Os12g01030
1.33319e-25	0.221335	0.214	0	3.45322e-21	9311	LOC_Os08g27604
1.33319e-25	0.21315	0.214	0	3.45322e-21	9311	LOC_Os09g38838
1.52214e-25	0.254021	0.238	0.008	3.94264e-21	9311	LOC_Os11g10070
1.59711e-25	0.319032	0.355	0.061	4.13683e-21	9311	LOC_Os10g20240
1.91817e-25	0.706979	0.964	0.958	4.96846e-21	9311	LOC_Os05g09580
1.99206e-25	0.269464	0.226	0.004	5.15982e-21	9311	LOC_Os02g42585
2.31065e-25	0.445405	0.315	0.04	5.98505e-21	9311	LOC_Os01g72970
2.52235e-25	0.487504	0.339	0.055	6.53338e-21	9311	LOC_Os07g45260
2.95473e-25	0.515894	0.577	0.233	7.65335e-21	9311	LOC_Os01g13660
3.16498e-25	0.568005	0.806	0.563	8.19793e-21	9311	LOC_Os06g49780
3.43842e-25	0.224404	0.218	0.002	8.90619e-21	9311	LOC_Os02g43080
3.65486e-25	0.962192	0.649	0.368	9.46683e-21	9311	LOC_Os02g40514
4.07772e-25	0.28283	0.21	0	1.05621e-20	9311	LOC_Os12g07714
4.07772e-25	0.230555	0.21	0	1.05621e-20	9311	LOC_Os06g48950
4.07772e-25	0.220705	0.21	0	1.05621e-20	9311	LOC_Os01g34974
4.07772e-25	0.219776	0.21	0	1.05621e-20	9311	LOC_Os05g05229
6.48594e-25	0.275795	0.282	0.027	1.67999e-20	9311	LOC_Os01g44050
9.08474e-25	0.384077	0.431	0.118	2.35313e-20	9311	LOC_Os12g39970
1.24364e-24	0.264551	0.206	0	3.22127e-20	9311	LOC_Os06g01879
1.24364e-24	0.204101	0.206	0	3.22127e-20	9311	LOC_Os01g24440
1.66065e-24	0.23872	0.23	0.008	4.30141e-20	9311	LOC_Os05g01330
1.77507e-24	0.385049	0.512	0.168	4.5978e-20	9311	LOC_Os08g37690
1.79878e-24	0.44561	0.262	0.021	4.6592e-20	9311	LOC_Os04g51460
3.78205e-24	0.410062	0.202	0	9.79627e-20	9311	LOC_Os10g38540
3.78205e-24	0.371681	0.202	0	9.79627e-20	9311	LOC_Os11g19871
5.86039e-24	0.753743	0.363	0.076	1.51796e-19	9311	LOC_Os05g04490
6.31086e-24	0.334605	0.315	0.048	1.63464e-19	9311	LOC_Os02g25060
6.71941e-24	0.81218	0.835	0.616	1.74046e-19	9311	LOC_Os09g25760
7.21835e-24	0.597605	0.774	0.502	1.8697e-19	9311	LOC_Os01g43370
8.87297e-24	0.577393	0.573	0.216	2.29828e-19	9311	LOC_Os01g61680
1.1469e-23	0.400843	0.198	0	2.97069e-19	9311	LOC_Os07g09394
1.1469e-23	0.340549	0.198	0	2.97069e-19	9311	LOC_Os09g25749
1.1469e-23	0.321134	0.198	0	2.97069e-19	9311	LOC_Os04g55709
1.1469e-23	0.283735	0.198	0	2.97069e-19	9311	LOC_Os01g66840
1.1469e-23	0.205304	0.198	0	2.97069e-19	9311	LOC_Os10g35989
1.3743e-23	0.405864	0.44	0.126	3.5597e-19	9311	LOC_Os08g01290
1.38586e-23	0.3736	0.363	0.08	3.58965e-19	9311	LOC_Os05g48570
1.491e-23	0.423505	0.444	0.13	3.86198e-19	9311	LOC_Os10g20250
1.59365e-23	0.40095	0.452	0.132	4.12786e-19	9311	LOC_Os03g31230
1.72923e-23	0.721997	0.931	0.845	4.47905e-19	9311	LOC_Os01g07970
2.32635e-23	0.257759	0.238	0.015	6.02571e-19	9311	LOC_Os03g21690
2.42098e-23	0.294616	0.266	0.025	6.27082e-19	9311	LOC_Os02g40900
2.42605e-23	0.29745	0.258	0.023	6.28396e-19	9311	LOC_Os03g22160
2.60495e-23	0.299885	0.258	0.023	6.74735e-19	9311	LOC_Os04g40630
2.66967e-23	0.26579	0.274	0.029	6.91498e-19	9311	LOC_Os03g55389
3.46784e-23	0.513022	0.883	0.763	8.98239e-19	9311	LOC_Os09g20660
3.46809e-23	0.223701	0.194	0	8.98306e-19	9311	LOC_Os04g48856
3.46809e-23	0.209501	0.194	0	8.98306e-19	9311	LOC_Os08g32579
3.70622e-23	0.551618	0.726	0.473	9.59985e-19	9311	LOC_Os01g57260
6.23742e-23	0.247768	0.262	0.025	1.61562e-18	9311	LOC_Os12g40300
1.04577e-22	0.241742	0.19	0	2.70875e-18	9311	EVM035742
1.04577e-22	0.212715	0.19	0	2.70875e-18	9311	LOC_Os06g44500
1.04577e-22	0.202633	0.19	0	2.70875e-18	9311	LOC_Os03g24664
1.37715e-22	0.347281	0.266	0.029	3.56709e-18	9311	LOC_Os02g50174
1.43656e-22	0.248286	0.29	0.04	3.72097e-18	9311	LOC_Os04g30910
1.49791e-22	0.624458	0.815	0.634	3.87988e-18	9311	LOC_Os03g29240
1.91884e-22	0.228616	0.202	0.004	4.97018e-18	9311	LOC_Os02g46660
3.08354e-22	0.468428	0.484	0.172	7.98699e-18	9311	LOC_Os06g06980
3.08875e-22	0.490414	0.738	0.389	8.00048e-18	9311	LOC_Os12g06780
3.1446e-22	0.228599	0.185	0	8.14514e-18	9311	LOC_Os01g05714
3.1446e-22	0.211703	0.185	0	8.14514e-18	9311	LOC_Os07g44290
3.28747e-22	0.345105	0.331	0.061	8.5152e-18	9311	LOC_Os03g18400
4.02073e-22	0.637588	0.81	0.515	1.04145e-17	9311	LOC_Os08g31850
4.90604e-22	0.538579	0.661	0.347	1.27076e-17	9311	LOC_Os01g06590
5.27503e-22	0.795886	0.891	0.769	1.36634e-17	9311	LOC_Os01g72530
5.97161e-22	0.340477	0.391	0.101	1.54677e-17	9311	LOC_Os04g45910
6.66501e-22	0.536492	0.734	0.489	1.72637e-17	9311	LOC_Os01g41010
9.42944e-22	0.212685	0.181	0	2.44241e-17	9311	LOC_Os01g61789
9.42948e-22	0.307818	0.181	0	2.44242e-17	9311	LOC_Os01g43729
9.42948e-22	0.2225	0.181	0	2.44242e-17	9311	LOC_Os04g51480
9.42948e-22	0.213523	0.181	0	2.44242e-17	9311	LOC_Os06g17076
1.01038e-21	0.451551	0.371	0.097	2.61707e-17	9311	LOC_Os06g08530
1.0728e-21	0.676013	0.714	0.405	2.77876e-17	9311	LOC_Os05g41590
1.20075e-21	0.402484	0.246	0.023	3.11018e-17	9311	LOC_Os12g21760
1.23139e-21	0.395915	0.552	0.239	3.18956e-17	9311	LOC_Os04g51780
1.23389e-21	0.786543	0.911	0.718	3.19602e-17	9311	LOC_Os03g51600
1.35078e-21	0.523031	0.528	0.189	3.4988e-17	9311	LOC_Os11g05614
1.86985e-21	0.200831	0.214	0.011	4.84329e-17	9311	LOC_Os09g32620
2.4392e-21	0.236411	0.226	0.017	6.31802e-17	9311	LOC_Os04g57970
2.81975e-21	0.385448	0.177	0	7.30372e-17	9311	EVM018052
2.81975e-21	0.237525	0.177	0	7.30372e-17	9311	LOC_Os03g63539
2.91053e-21	0.580769	0.399	0.12	7.53886e-17	9311	LOC_Os06g07030
2.93675e-21	0.493426	0.484	0.17	7.60676e-17	9311	LOC_Os12g32190
3.1565e-21	0.605754	0.391	0.109	8.17596e-17	9311	LOC_Os11g08380
3.65118e-21	0.535937	0.452	0.151	9.45729e-17	9311	LOC_Os03g11900
3.78219e-21	0.283849	0.302	0.05	9.79662e-17	9311	LOC_Os08g15840
4.07799e-21	0.59767	0.536	0.248	1.05628e-16	9311	LOC_Os03g53650
5.52445e-21	0.2303	0.214	0.013	1.43094e-16	9311	LOC_Os09g02400
5.68534e-21	0.409109	0.996	0.985	1.47262e-16	9311	LOC_Os03g38520
6.62315e-21	0.244864	0.286	0.046	1.71553e-16	9311	LOC_Os07g38560
6.75454e-21	0.909133	0.899	0.683	1.74956e-16	9311	LOC_Os01g72009
7.39453e-21	0.258562	0.234	0.021	1.91533e-16	9311	LOC_Os04g53760
8.19739e-21	0.714138	0.94	0.819	2.12329e-16	9311	LOC_Os03g55980
8.40897e-21	0.275203	0.173	0	2.17809e-16	9311	LOC_Os04g12960
9.53095e-21	0.427074	0.286	0.044	2.46871e-16	9311	LOC_Os02g52540
1.11784e-20	0.288618	0.347	0.082	2.89542e-16	9311	LOC_Os01g12800
1.17262e-20	0.201873	0.185	0.004	3.03732e-16	9311	LOC_Os09g39462
1.37222e-20	0.620965	0.552	0.237	3.55433e-16	9311	LOC_Os02g37180
1.39845e-20	0.444295	0.25	0.029	3.62226e-16	9311	LOC_Os04g53606
1.71106e-20	0.578313	0.677	0.389	4.43198e-16	9311	LOC_Os05g50180
1.80924e-20	0.357066	1	1	4.68629e-16	9311	LOC_Os07g02340
1.90145e-20	0.384536	0.19	0.006	4.92514e-16	9311	LOC_Os04g51680
2.35131e-20	0.258472	0.258	0.034	6.09037e-16	9311	LOC_Os06g01680
2.50088e-20	0.30846	0.169	0	6.47778e-16	9311	LOC_Os03g15084
2.89639e-20	0.208876	0.202	0.011	7.50222e-16	9311	LOC_Os02g39390
2.90968e-20	0.256627	0.274	0.04	7.53665e-16	9311	LOC_Os02g52620
3.04233e-20	0.348011	0.206	0.013	7.88025e-16	9311	LOC_Os02g13660
3.5453e-20	0.414387	0.282	0.046	9.18305e-16	9311	LOC_Os02g50340
3.84838e-20	0.544081	0.815	0.534	9.96808e-16	9311	LOC_Os04g21950
4.14971e-20	0.451081	0.435	0.153	1.07486e-15	9311	LOC_Os09g36450
4.76063e-20	0.219811	0.246	0.027	1.2331e-15	9311	LOC_Os05g11140
5.35996e-20	0.271262	0.206	0.013	1.38834e-15	9311	LOC_Os03g25030
5.91212e-20	0.294583	0.173	0.002	1.53136e-15	9311	LOC_Os06g49840
7.06669e-20	0.357229	0.992	0.994	1.83042e-15	9311	LOC_Os04g02670
7.80336e-20	0.663039	0.871	0.712	2.02123e-15	9311	LOC_Os01g58150
8.17663e-20	0.850502	0.851	0.63	2.11791e-15	9311	LOC_Os03g08020
8.45716e-20	0.707355	1	0.998	2.19057e-15	9311	LOC_Os08g10480
9.62555e-20	0.528949	0.23	0.023	2.49321e-15	9311	LOC_Os01g04670
1.13006e-19	0.31188	0.379	0.109	2.92708e-15	9311	LOC_Os05g28480
1.16688e-19	0.535798	0.637	0.342	3.02245e-15	9311	LOC_Os03g20949
1.34299e-19	0.225994	0.238	0.027	3.47861e-15	9311	LOC_Os09g32040
1.3813e-19	0.560853	0.738	0.489	3.57785e-15	9311	LOC_Os04g53230
1.41572e-19	0.539122	0.77	0.544	3.66699e-15	9311	LOC_Os01g47690
2.19422e-19	0.393751	0.161	0	5.68346e-15	9311	LOC_Os04g39054
2.21463e-19	0.346173	0.363	0.097	5.73634e-15	9311	LOC_Os09g34280
2.36116e-19	0.44647	0.931	0.824	6.11587e-15	9311	LOC_Os04g42090
2.42502e-19	0.224458	0.194	0.011	6.2813e-15	9311	LOC_Os06g19470
2.83814e-19	0.477953	0.69	0.441	7.35136e-15	9311	LOC_Os08g16559
3.88065e-19	0.236763	0.226	0.025	1.00517e-14	9311	LOC_Os01g74350
4.15095e-19	0.373157	0.452	0.174	1.07518e-14	9311	LOC_Os01g02334
5.26141e-19	0.222726	0.222	0.023	1.36281e-14	9311	LOC_Os03g49430
7.56288e-19	0.441376	0.48	0.176	1.95894e-14	9311	LOC_Os02g47090
7.65955e-19	0.258688	0.306	0.065	1.98398e-14	9311	LOC_Os02g25580
9.14625e-19	0.539958	0.512	0.244	2.36906e-14	9311	LOC_Os09g27030
1.20987e-18	0.226122	0.266	0.044	3.13379e-14	9311	LOC_Os04g56450
1.90479e-18	0.285309	0.153	0	4.93379e-14	9311	LOC_Os01g42864
2.13697e-18	0.480028	0.371	0.111	5.53519e-14	9311	LOC_Os07g05700
3.03133e-18	0.932962	0.952	0.922	7.85174e-14	9311	LOC_Os11g04409
3.17154e-18	0.36573	0.278	0.057	8.21491e-14	9311	LOC_Os08g33750
4.61318e-18	0.45866	0.544	0.271	1.19491e-13	9311	LOC_Os04g48730
5.12609e-18	0.515489	0.339	0.09	1.32776e-13	9311	LOC_Os10g38670
6.02097e-18	0.637577	0.415	0.153	1.55955e-13	9311	LOC_Os06g37560
6.1343e-18	0.519091	0.411	0.134	1.58891e-13	9311	LOC_Os11g30290
6.99327e-18	0.4801	0.565	0.279	1.8114e-13	9311	LOC_Os10g39140
7.22264e-18	0.242572	0.302	0.067	1.87081e-13	9311	LOC_Os01g69980
7.93382e-18	0.489559	0.528	0.286	2.05502e-13	9311	LOC_Os07g12170
1.00903e-17	0.35016	0.363	0.107	2.61358e-13	9311	LOC_Os08g42750
1.29965e-17	0.782611	0.867	0.71	3.36635e-13	9311	LOC_Os01g57470
1.63636e-17	0.360732	0.145	0	4.23851e-13	9311	LOC_Os04g13332
1.67995e-17	0.400019	1	0.998	4.3514e-13	9311	LOC_Os06g02470
1.81688e-17	0.903889	0.371	0.116	4.70609e-13	9311	LOC_Os08g24300
2.07599e-17	0.567365	0.476	0.21	5.37724e-13	9311	LOC_Os08g35600
2.28552e-17	0.678557	0.806	0.586	5.91996e-13	9311	LOC_Os05g02760
2.98801e-17	0.429412	0.976	0.956	7.73955e-13	9311	LOC_Os03g03770
3.94751e-17	1.42506	0.431	0.176	1.02248e-12	9311	LOC_Os12g02300
4.58008e-17	0.411749	0.19	0.017	1.18633e-12	9311	LOC_Os07g44250
5.09147e-17	0.407607	0.714	0.561	1.31879e-12	9311	LOC_Os08g15170
5.95895e-17	0.356416	0.423	0.162	1.54349e-12	9311	LOC_Os06g03682
7.03347e-17	0.216952	0.19	0.017	1.82181e-12	9311	LOC_Os01g57073
7.1342e-17	0.312894	0.371	0.122	1.8479e-12	9311	LOC_Os06g35410
7.29102e-17	0.777192	0.52	0.231	1.88852e-12	9311	LOC_Os01g50104
7.61911e-17	0.415786	0.391	0.134	1.9735e-12	9311	LOC_Os05g41380
8.53051e-17	0.60646	0.69	0.437	2.20957e-12	9311	LOC_Os07g42220
9.19913e-17	0.600563	0.952	0.92	2.38276e-12	9311	LOC_Os09g21710
9.48513e-17	0.460433	0.964	0.966	2.45684e-12	9311	LOC_Os02g39850
9.5266e-17	0.518451	0.988	0.95	2.46758e-12	9311	LOC_Os07g30970
1.00518e-16	0.277289	0.339	0.099	2.60363e-12	9311	LOC_Os12g08280
1.08811e-16	0.377725	0.44	0.176	2.81841e-12	9311	LOC_Os02g58560
1.39145e-16	0.246368	0.137	0	3.60413e-12	9311	LOC_Os05g13934
1.46754e-16	0.279433	0.343	0.101	3.80123e-12	9311	LOC_Os03g59170
1.80871e-16	0.348796	0.988	0.998	4.68493e-12	9311	LOC_Os05g41060
2.9754e-16	0.395366	0.492	0.235	7.70689e-12	9311	LOC_Os05g43570
3.00776e-16	0.49039	0.585	0.359	7.7907e-12	9311	LOC_Os07g27930
3.21913e-16	0.261047	0.262	0.055	8.3382e-12	9311	LOC_Os08g32610
3.365e-16	0.289656	0.355	0.105	8.71603e-12	9311	LOC_Os02g46260
4.92676e-16	0.507364	0.891	0.775	1.27613e-11	9311	LOC_Os04g53620
5.47271e-16	0.233823	0.238	0.042	1.41754e-11	9311	LOC_Os09g39440
5.85915e-16	0.339163	1	1	1.51764e-11	9311	LOC_Os07g48244
7.4536e-16	0.341622	0.407	0.153	1.93063e-11	9311	LOC_Os09g21230
7.48132e-16	0.280112	0.343	0.107	1.93781e-11	9311	LOC_Os03g62250
8.51925e-16	0.596157	0.569	0.338	2.20665e-11	9311	LOC_Os04g52370
9.57279e-16	0.216763	0.198	0.025	2.47954e-11	9311	LOC_Os01g39330
9.91845e-16	0.324584	0.226	0.038	2.56908e-11	9311	LOC_Os04g34030
1.23232e-15	0.412006	0.956	0.931	3.19194e-11	9311	LOC_Os11g06890
1.31271e-15	0.395644	0.536	0.284	3.40018e-11	9311	LOC_Os07g47350
1.33793e-15	0.230911	0.306	0.082	3.46549e-11	9311	LOC_Os06g50146
1.41678e-15	0.464854	0.919	0.853	3.66973e-11	9311	LOC_Os03g08330
1.45938e-15	0.273034	0.331	0.105	3.78009e-11	9311	LOC_Os02g39890
1.47792e-15	0.428935	0.742	0.557	3.8281e-11	9311	LOC_Os02g10720
1.53732e-15	0.301168	0.407	0.153	3.98197e-11	9311	LOC_Os03g52760
1.59008e-15	0.261721	0.29	0.076	4.11863e-11	9311	LOC_Os06g17390
1.68692e-15	0.412281	0.948	0.914	4.36946e-11	9311	LOC_Os09g38740
1.90785e-15	0.235319	0.246	0.05	4.9417e-11	9311	LOC_Os02g48680
1.91208e-15	0.26029	0.258	0.059	4.95266e-11	9311	LOC_Os05g50840
1.99854e-15	0.388029	0.952	0.897	5.17662e-11	9311	LOC_Os06g11135
2.19544e-15	0.27212	0.302	0.086	5.68664e-11	9311	LOC_Os08g44770
2.22055e-15	0.550974	0.69	0.468	5.75167e-11	9311	LOC_Os07g32570
2.22329e-15	0.357875	0.476	0.231	5.75876e-11	9311	LOC_Os02g09650
2.22368e-15	0.511581	0.73	0.498	5.75979e-11	9311	LOC_Os04g53190
2.85612e-15	0.512118	0.435	0.187	7.39793e-11	9311	LOC_Os03g61240
3.44945e-15	0.537211	0.476	0.225	8.93476e-11	9311	LOC_Os09g36950
3.6016e-15	0.499059	0.698	0.429	9.32886e-11	9311	LOC_Os01g72690
3.7061e-15	0.516228	0.593	0.34	9.59954e-11	9311	LOC_Os05g24550
3.94331e-15	0.28097	0.198	0.027	1.0214e-10	9311	LOC_Os02g30100
4.73626e-15	0.378557	0.536	0.303	1.22678e-10	9311	LOC_Os12g30060
5.56806e-15	0.459248	0.593	0.34	1.44224e-10	9311	LOC_Os08g32080
8.01359e-15	0.508545	0.492	0.244	2.07568e-10	9311	LOC_Os01g54340
9.76644e-15	0.262817	0.121	0	2.5297e-10	9311	LOC_Os11g02005
1.01903e-14	0.344398	1	1	2.6395e-10	9311	LOC_Os07g45320
1.37711e-14	0.36504	0.935	0.849	3.56698e-10	9311	LOC_Os06g17870
1.62617e-14	0.26561	0.319	0.103	4.21212e-10	9311	LOC_Os01g51800
2.25627e-14	0.49721	0.484	0.235	5.84418e-10	9311	LOC_Os02g41510
2.39918e-14	0.329507	0.226	0.044	6.21434e-10	9311	LOC_Os09g23530
2.43462e-14	0.257894	0.266	0.071	6.30616e-10	9311	LOC_Os10g36470
3.33108e-14	0.411598	0.738	0.571	8.62816e-10	9311	LOC_Os10g42540
3.56115e-14	0.313728	0.254	0.065	9.22409e-10	9311	LOC_Os02g01250
4.11703e-14	0.91549	0.778	0.557	1.06639e-09	9311	LOC_Os03g16020
4.19309e-14	0.486553	0.556	0.29	1.08609e-09	9311	LOC_Os01g17330
4.22653e-14	0.308242	0.395	0.166	1.09476e-09	9311	LOC_Os03g60130
4.35068e-14	0.201884	0.198	0.032	1.12691e-09	9311	LOC_Os03g20180
4.91275e-14	0.573198	0.871	0.784	1.2725e-09	9311	LOC_Os05g11900
5.63222e-14	0.388133	0.472	0.221	1.45886e-09	9311	LOC_Os02g48470
5.64071e-14	0.50574	0.815	0.761	1.46106e-09	9311	LOC_Os12g31780
5.78974e-14	0.339233	0.996	0.996	1.49966e-09	9311	LOC_Os04g57220
6.02173e-14	0.285281	0.363	0.137	1.55975e-09	9311	LOC_Os10g35850
6.29035e-14	0.479782	0.71	0.532	1.62933e-09	9311	LOC_Os06g41770
6.83361e-14	0.216345	0.226	0.046	1.77004e-09	9311	LOC_Os01g72940
7.38501e-14	0.480694	0.399	0.164	1.91287e-09	9311	LOC_Os11g33270
7.80894e-14	0.883668	0.911	0.857	2.02267e-09	9311	LOC_Os12g04204
9.06468e-14	0.313838	0.456	0.204	2.34793e-09	9311	LOC_Os02g36340
9.16929e-14	0.448737	0.379	0.145	2.37503e-09	9311	LOC_Os10g40550
1.01159e-13	0.467316	0.673	0.443	2.62021e-09	9311	LOC_Os08g43270
1.1343e-13	0.367172	0.544	0.286	2.93807e-09	9311	LOC_Os03g17000
1.25184e-13	0.397342	0.637	0.445	3.24253e-09	9311	LOC_Os01g48760
1.26911e-13	1.56295	0.802	0.672	3.28726e-09	9311	LOC_Os04g46810
1.45883e-13	0.480387	0.952	0.887	3.77866e-09	9311	LOC_Os06g11130
1.58418e-13	0.474589	0.823	0.664	4.10333e-09	9311	LOC_Os01g52260
1.79169e-13	0.341389	0.79	0.634	4.64084e-09	9311	LOC_Os06g10890
1.92226e-13	0.463509	0.94	0.912	4.97905e-09	9311	LOC_Os04g58890
1.93662e-13	0.216496	0.266	0.076	5.01624e-09	9311	LOC_Os04g53220
2.34641e-13	0.408667	0.56	0.334	6.07768e-09	9311	LOC_Os05g19970
2.42049e-13	0.409212	0.73	0.527	6.26955e-09	9311	LOC_Os05g48980
2.68999e-13	0.460359	0.452	0.231	6.9676e-09	9311	LOC_Os06g44160
3.42711e-13	0.360118	0.399	0.195	8.87691e-09	9311	LOC_Os06g48600
3.43504e-13	0.230103	0.242	0.057	8.89745e-09	9311	LOC_Os07g38840
3.60091e-13	0.390034	0.714	0.527	9.32709e-09	9311	LOC_Os01g51220
4.37748e-13	0.347821	0.177	0.027	1.13385e-08	9311	LOC_Os11g30600
4.67194e-13	0.23813	0.282	0.084	1.21013e-08	9311	LOC_Os06g44450
5.11005e-13	0.446125	0.734	0.538	1.32361e-08	9311	LOC_Os01g56930
5.20559e-13	0.276517	0.27	0.084	1.34835e-08	9311	LOC_Os08g29669
5.58762e-13	0.552329	0.173	0.025	1.4473e-08	9311	LOC_Os10g40460
5.72988e-13	0.783013	0.456	0.242	1.48415e-08	9311	LOC_Os08g42800
5.95868e-13	0.391779	0.431	0.197	1.54342e-08	9311	LOC_Os01g16714
6.83446e-13	0.41152	0.444	0.233	1.77026e-08	9311	LOC_Os07g42395
9.15945e-13	0.220798	0.274	0.08	2.37248e-08	9311	LOC_Os09g32240
9.85546e-13	0.439201	0.815	0.624	2.55276e-08	9311	LOC_Os04g45280
9.99529e-13	0.422285	0.827	0.71	2.58898e-08	9311	LOC_Os05g27930
1.01278e-12	0.311077	0.395	0.179	2.62331e-08	9311	LOC_Os08g45220
1.07749e-12	0.263033	0.246	0.065	2.79092e-08	9311	LOC_Os03g02160
1.08425e-12	0.42222	0.585	0.382	2.80843e-08	9311	LOC_Os02g57650
1.15345e-12	0.713321	0.391	0.17	2.98766e-08	9311	LOC_Os01g57040
1.2969e-12	0.357529	0.948	0.901	3.35923e-08	9311	LOC_Os01g17190
1.51324e-12	0.792093	0.508	0.267	3.9196e-08	9311	LOC_Os12g02080
1.76067e-12	0.497495	0.484	0.273	4.5605e-08	9311	LOC_Os12g32610
1.77341e-12	0.24348	0.266	0.084	4.59348e-08	9311	LOC_Os08g33720
1.89007e-12	0.412411	0.25	0.067	4.89566e-08	9311	LOC_Os01g72150
2.13269e-12	0.270009	0.395	0.172	5.52409e-08	9311	LOC_Os01g12910
2.13882e-12	0.338238	0.976	0.947	5.53997e-08	9311	LOC_Os03g27310
2.14122e-12	0.62062	0.343	0.137	5.54619e-08	9311	LOC_Os07g40240
2.15363e-12	0.286642	0.282	0.09	5.57834e-08	9311	LOC_Os04g52500
2.56884e-12	0.243756	0.214	0.05	6.65381e-08	9311	LOC_Os03g03810
2.67318e-12	0.66116	0.685	0.517	6.92407e-08	9311	LOC_Os03g11060
2.95117e-12	0.510488	0.935	0.945	7.64412e-08	9311	LOC_Os02g52290
3.34669e-12	0.37933	0.532	0.313	8.66859e-08	9311	LOC_Os07g43170
3.86523e-12	0.704907	0.649	0.433	1.00117e-07	9311	LOC_Os09g26340
4.03525e-12	0.294269	0.343	0.13	1.04521e-07	9311	LOC_Os02g53870
4.25633e-12	0.286825	0.286	0.097	1.10247e-07	9311	LOC_Os02g39720
5.0929e-12	0.284118	0.387	0.166	1.31916e-07	9311	LOC_Os10g05130
5.32941e-12	0.26529	0.355	0.147	1.38042e-07	9311	LOC_Os06g40120
6.32135e-12	0.562112	0.927	0.87	1.63736e-07	9311	LOC_Os12g02040
6.34231e-12	0.437921	0.315	0.124	1.64278e-07	9311	LOC_Os01g01870
7.67672e-12	0.460107	0.601	0.399	1.98842e-07	9311	LOC_Os05g23130
7.71152e-12	0.249506	0.266	0.08	1.99744e-07	9311	LOC_Os03g05160
1.02425e-11	0.538809	0.512	0.324	2.65302e-07	9311	LOC_Os04g56520
1.03997e-11	0.261834	0.177	0.034	2.69374e-07	9311	LOC_Os06g15620
1.06895e-11	0.598905	0.798	0.653	2.7688e-07	9311	LOC_Os01g19020
1.21019e-11	0.408146	0.415	0.2	3.13464e-07	9311	LOC_Os04g33990
1.2146e-11	0.552017	0.798	0.595	3.14606e-07	9311	LOC_Os02g52170
1.26336e-11	0.529685	0.899	0.834	3.27234e-07	9311	LOC_Os07g45060
1.34036e-11	0.402331	0.29	0.103	3.47179e-07	9311	LOC_Os01g51870
1.35843e-11	0.584398	0.911	0.859	3.51861e-07	9311	LOC_Os06g04070
1.37708e-11	0.290443	0.988	0.994	3.56691e-07	9311	LOC_Os08g06430
1.40469e-11	0.802348	0.625	0.441	3.63842e-07	9311	LOC_Os01g57030
1.40656e-11	0.203894	0.218	0.055	3.64328e-07	9311	LOC_Os02g32060
1.52324e-11	0.609387	0.468	0.242	3.94549e-07	9311	LOC_Os01g09080
1.5381e-11	0.809053	0.883	0.794	3.98398e-07	9311	LOC_Os02g03710
1.58433e-11	0.263963	0.319	0.12	4.10373e-07	9311	LOC_Os02g55080
1.64737e-11	0.465821	0.677	0.464	4.26701e-07	9311	LOC_Os08g04800
1.71459e-11	0.483557	0.859	0.679	4.44112e-07	9311	LOC_Os09g31080
1.81833e-11	0.426753	0.746	0.557	4.70984e-07	9311	LOC_Os02g10730
1.83793e-11	0.215835	0.226	0.059	4.76062e-07	9311	LOC_Os04g52600
1.88267e-11	0.487447	0.593	0.389	4.87649e-07	9311	LOC_Os12g23280
2.03167e-11	0.242329	0.286	0.107	5.26243e-07	9311	LOC_Os01g08960
2.25498e-11	0.311081	0.383	0.179	5.84086e-07	9311	LOC_Os07g42890
2.36573e-11	0.371531	0.698	0.517	6.1277e-07	9311	LOC_Os01g45700
2.58786e-11	0.234842	0.363	0.155	6.70307e-07	9311	LOC_Os03g17490
2.69058e-11	0.374766	0.79	0.626	6.96915e-07	9311	LOC_Os01g62850
2.78057e-11	0.393347	0.44	0.223	7.20223e-07	9311	LOC_Os07g09010
3.3952e-11	0.355175	0.827	0.641	8.79425e-07	9311	LOC_Os07g33270
3.45791e-11	0.233617	0.161	0.027	8.95667e-07	9311	LOC_Os07g37620
3.47878e-11	0.584797	0.27	0.092	9.01075e-07	9311	LOC_Os02g30470
3.68248e-11	0.295739	1	1	9.53836e-07	9311	LOC_Os01g25540
3.82559e-11	0.22173	0.27	0.09	9.90904e-07	9311	LOC_Os04g33780
3.94914e-11	0.567862	0.351	0.162	1.02291e-06	9311	LOC_Os05g44060
3.97387e-11	0.276359	0.306	0.126	1.02931e-06	9311	LOC_Os05g45220
4.1324e-11	0.200663	0.173	0.034	1.07038e-06	9311	LOC_Os08g08700
4.31202e-11	0.521907	0.774	0.62	1.1169e-06	9311	LOC_Os07g27810
4.31617e-11	0.215222	0.185	0.04	1.11798e-06	9311	LOC_Os03g51150
4.63513e-11	0.298935	0.54	0.328	1.20059e-06	9311	LOC_Os09g24990
4.64236e-11	0.279569	0.468	0.267	1.20246e-06	9311	LOC_Os03g01810
4.86541e-11	0.40947	0.601	0.397	1.26024e-06	9311	LOC_Os12g43580
4.89691e-11	0.528556	0.278	0.099	1.2684e-06	9311	LOC_Os11g05170
5.10597e-11	0.537097	0.806	0.618	1.32255e-06	9311	LOC_Os01g04730
5.16779e-11	0.706284	0.581	0.38	1.33856e-06	9311	LOC_Os03g60540
6.81001e-11	0.324246	0.339	0.147	1.76393e-06	9311	LOC_Os06g37364
7.69704e-11	0.389981	0.577	0.355	1.99369e-06	9311	LOC_Os07g38570
8.07541e-11	0.255503	0.403	0.189	2.09169e-06	9311	LOC_Os01g65310
8.60375e-11	0.404964	0.879	0.756	2.22854e-06	9311	LOC_Os05g42424
8.83764e-11	0.286458	0.161	0.029	2.28913e-06	9311	LOC_Os03g25340
9.98096e-11	0.329176	0.875	0.828	2.58527e-06	9311	LOC_Os03g10510
1.21986e-10	0.510148	0.085	0	3.15968e-06	9311	LOC_Os01g73729
1.21986e-10	0.383516	0.085	0	3.15968e-06	9311	LOC_Os04g34244
1.24249e-10	0.208661	0.226	0.063	3.21831e-06	9311	LOC_Os09g29300
1.25689e-10	0.351544	0.992	0.977	3.2556e-06	9311	LOC_Os05g03150
1.35226e-10	0.377115	0.351	0.168	3.50263e-06	9311	LOC_Os06g50154
1.38186e-10	0.299938	0.258	0.088	3.5793e-06	9311	LOC_Os05g37130
1.51151e-10	0.429709	0.411	0.218	3.91511e-06	9311	LOC_Os03g41390
1.74123e-10	0.753458	0.722	0.553	4.51014e-06	9311	LOC_Os12g40180
1.75272e-10	0.326797	0.21	0.059	4.5399e-06	9311	LOC_Os06g10610
1.84418e-10	0.582093	0.347	0.164	4.7768e-06	9311	LOC_Os06g41600
1.94563e-10	0.30926	0.516	0.307	5.03956e-06	9311	LOC_Os07g30100
2.12548e-10	0.252465	0.157	0.029	5.50541e-06	9311	LOC_Os03g17870
2.54039e-10	0.323021	0.258	0.09	6.58013e-06	9311	LOC_Os06g31090
2.57981e-10	0.330226	0.343	0.155	6.68223e-06	9311	LOC_Os08g31510
2.71392e-10	0.328324	0.48	0.275	7.0296e-06	9311	LOC_Os01g42410
2.8189e-10	0.673367	0.411	0.223	7.30152e-06	9311	LOC_Os01g04050
3.12008e-10	0.391692	0.581	0.414	8.08162e-06	9311	LOC_Os04g31110
3.39506e-10	0.21573	0.298	0.118	8.79389e-06	9311	LOC_Os03g04470
3.44821e-10	0.321927	0.633	0.458	8.93155e-06	9311	LOC_Os04g38525
3.56901e-10	0.271355	0.44	0.248	9.24445e-06	9311	LOC_Os04g56610
4.05024e-10	0.304248	0.246	0.084	1.04909e-05	9311	LOC_Os02g32814
4.53713e-10	0.286987	0.367	0.176	1.17521e-05	9311	LOC_Os07g41810
4.6327e-10	1.21327	0.419	0.242	1.19996e-05	9311	LOC_Os07g18750
4.79626e-10	0.229748	0.282	0.109	1.24233e-05	9311	LOC_Os05g08640
5.22174e-10	0.380428	0.258	0.09	1.35254e-05	9311	LOC_Os01g73024
5.27007e-10	0.291907	0.25	0.088	1.36505e-05	9311	LOC_Os03g56610
6.50277e-10	0.395553	0.452	0.237	1.68435e-05	9311	LOC_Os02g15290
6.51785e-10	0.270116	0.266	0.095	1.68825e-05	9311	LOC_Os05g44340
6.53136e-10	0.34284	0.407	0.218	1.69175e-05	9311	LOC_Os10g37350
8.531e-10	0.256231	0.125	0.017	2.2097e-05	9311	LOC_Os11g37960
8.64876e-10	0.475643	0.266	0.099	2.2402e-05	9311	LOC_Os03g52370
9.19461e-10	0.204293	0.984	1	2.38159e-05	9311	LOC_Os03g56190
1.05995e-09	0.286842	0.375	0.191	2.74547e-05	9311	LOC_Os08g39980
1.17193e-09	0.367121	0.645	0.452	3.03554e-05	9311	LOC_Os01g38980
1.20924e-09	0.359527	0.988	0.975	3.13217e-05	9311	LOC_Os02g41630
1.21221e-09	0.299924	0.556	0.336	3.13985e-05	9311	LOC_Os08g15230
1.22341e-09	0.30671	0.52	0.313	3.16887e-05	9311	LOC_Os03g19020
1.23656e-09	0.214546	1	1	3.20294e-05	9311	LOC_Os05g34770
1.33593e-09	0.351016	0.371	0.204	3.46034e-05	9311	LOC_Os10g22330
1.38291e-09	0.344259	0.996	1	3.58201e-05	9311	LOC_Os05g40300
1.39527e-09	0.358796	0.879	0.803	3.61402e-05	9311	LOC_Os08g14570
1.48217e-09	0.249401	0.19	0.05	3.83913e-05	9311	LOC_Os10g28240
1.51364e-09	0.284157	0.375	0.195	3.92063e-05	9311	LOC_Os05g41670
1.68966e-09	0.214853	0.101	0.008	4.37655e-05	9311	LOC_Os01g73700
1.73091e-09	0.317243	0.859	0.721	4.4834e-05	9311	LOC_Os02g51750
1.86953e-09	0.285668	0.27	0.103	4.84246e-05	9311	LOC_Os07g48830
2.12929e-09	0.375896	0.915	0.847	5.51528e-05	9311	LOC_Os04g30420
2.30109e-09	0.38384	0.427	0.242	5.96028e-05	9311	LOC_Os11g07580
2.40383e-09	0.242069	0.218	0.071	6.2264e-05	9311	LOC_Os03g25760
2.53805e-09	0.393586	0.694	0.576	6.57405e-05	9311	LOC_Os10g35630
2.5883e-09	0.350348	0.81	0.66	6.70421e-05	9311	LOC_Os03g07380
2.98979e-09	0.337383	0.262	0.109	7.74416e-05	9311	LOC_Os01g55030
3.21528e-09	0.374957	0.613	0.46	8.32823e-05	9311	LOC_Os07g44610
3.58366e-09	0.262053	0.431	0.261	9.2824e-05	9311	LOC_Os11g38990
3.86889e-09	0.3086	1	1	0.000100212	9311	LOC_Os06g05880
4.15142e-09	0.362832	0.762	0.643	0.00010753	9311	LOC_Os03g05730
4.1705e-09	0.316009	0.44	0.25	0.000108024	9311	LOC_Os06g34120
4.20276e-09	0.216021	0.29	0.118	0.00010886	9311	LOC_Os02g43900
4.3049e-09	0.269875	0.71	0.553	0.000111505	9311	LOC_Os03g50280
4.57829e-09	0.34409	0.286	0.126	0.000118587	9311	LOC_Os11g03420
4.80159e-09	0.340703	0.827	0.634	0.000124371	9311	LOC_Os04g58190
5.14761e-09	0.252192	0.149	0.032	0.000133333	9311	LOC_Os01g68580
5.51862e-09	0.246251	1	1	0.000142943	9311	LOC_Os12g37419
5.60982e-09	0.291914	0.694	0.546	0.000145306	9311	LOC_Os05g41510
5.99186e-09	0.296042	0.581	0.391	0.000155201	9311	LOC_Os07g39560
6.25139e-09	0.311861	0.391	0.206	0.000161924	9311	LOC_Os01g62840
6.30359e-09	0.301169	0.395	0.212	0.000163276	9311	LOC_Os10g10080
7.33002e-09	0.229897	0.444	0.248	0.000189862	9311	LOC_Os10g33270
7.61578e-09	0.269495	0.746	0.567	0.000197264	9311	LOC_Os01g64170
7.74573e-09	0.550603	0.089	0.006	0.00020063	9311	LOC_Os06g04620
8.36875e-09	0.539278	0.395	0.223	0.000216767	9311	LOC_Os02g01332
8.45657e-09	0.423086	0.738	0.553	0.000219042	9311	LOC_Os07g42200
9.58407e-09	0.212227	0.27	0.111	0.000248247	9311	LOC_Os01g47620
9.93206e-09	0.204814	0.194	0.059	0.00025726	9311	LOC_Os03g43770
1.06536e-08	0.228489	0.234	0.084	0.00027595	9311	LOC_Os09g37180
1.21118e-08	0.200821	0.21	0.069	0.000313719	9311	LOC_Os04g32920
1.23646e-08	0.497334	0.738	0.651	0.000320268	9311	LOC_Os01g15970
1.34322e-08	0.325603	0.56	0.387	0.000347922	9311	LOC_Os01g09770
1.50801e-08	0.49321	0.415	0.235	0.000390605	9311	LOC_Os01g70500
1.6386e-08	0.479268	0.544	0.393	0.000424429	9311	LOC_Os02g09990
1.70656e-08	0.215997	0.282	0.126	0.000442033	9311	LOC_Os05g37820
1.74279e-08	0.335496	0.315	0.145	0.000451418	9311	LOC_Os02g50374
1.84564e-08	0.248152	0.278	0.122	0.000478057	9311	LOC_Os06g11980
2.08508e-08	0.715488	0.315	0.158	0.000540077	9311	LOC_Os02g30600
2.19601e-08	0.205972	0.254	0.097	0.000568812	9311	LOC_Os06g47700
2.33484e-08	0.448038	0.548	0.372	0.00060477	9311	LOC_Os05g41460
2.62985e-08	0.541181	0.734	0.605	0.000681183	9311	LOC_Os01g26664
2.65968e-08	0.486403	0.762	0.689	0.00068891	9311	LOC_Os10g25230
2.66633e-08	0.535691	0.54	0.37	0.000690632	9311	LOC_Os02g48280
2.69056e-08	0.290797	0.395	0.244	0.000696909	9311	LOC_Os03g02680
2.9689e-08	0.219666	0.141	0.032	0.000769005	9311	LOC_Os02g57560
3.02874e-08	0.247554	0.472	0.294	0.000784504	9311	LOC_Os02g51414
3.21838e-08	0.406375	0.633	0.462	0.000833624	9311	LOC_Os09g30486
3.35479e-08	0.316414	0.403	0.25	0.000868958	9311	LOC_Os03g06120
3.52199e-08	0.232239	0.157	0.04	0.000912266	9311	LOC_Os08g37680
3.79661e-08	0.323225	0.258	0.109	0.000983398	9311	LOC_Os11g32750
3.88684e-08	0.278552	0.395	0.21	0.00100677	9311	LOC_Os10g37190
3.98149e-08	0.265463	0.278	0.124	0.00103129	9311	LOC_Os10g41550
4.04278e-08	0.311515	0.774	0.683	0.00104716	9311	LOC_Os02g52430
4.12649e-08	0.24218	0.141	0.034	0.00106884	9311	LOC_Os06g45370
4.35336e-08	0.25394	0.665	0.496	0.00112761	9311	LOC_Os08g07830
4.46161e-08	0.242881	0.25	0.107	0.00115565	9311	LOC_Os04g32950
4.48931e-08	0.281806	0.411	0.248	0.00116282	9311	LOC_Os09g20650
5.11906e-08	0.258153	0.988	0.977	0.00132594	9311	LOC_Os08g42000
5.59724e-08	0.289734	0.181	0.057	0.0014498	9311	LOC_Os03g18490
5.99429e-08	0.453587	0.46	0.286	0.00155264	9311	LOC_Os08g07620
6.57184e-08	0.304072	0.456	0.282	0.00170224	9311	LOC_Os02g50350
6.58822e-08	0.739886	0.435	0.261	0.00170648	9311	LOC_Os01g14670
6.86513e-08	0.283504	0.274	0.122	0.00177821	9311	LOC_Os10g23820
7.37684e-08	0.270792	0.528	0.374	0.00191075	9311	LOC_Os02g47000
7.43957e-08	0.248905	0.774	0.679	0.001927	9311	LOC_Os10g39120
7.65396e-08	0.390781	0.827	0.744	0.00198253	9311	LOC_Os07g42960
7.93973e-08	0.362268	0.222	0.084	0.00205655	9311	LOC_Os03g20120
8.45174e-08	0.856075	0.085	0.008	0.00218917	9311	LOC_Os08g01370
8.80003e-08	0.408024	0.617	0.471	0.00227938	9311	LOC_Os12g32620
9.10308e-08	0.431807	0.802	0.714	0.00235788	9311	LOC_Os01g73140
9.18351e-08	0.386856	0.556	0.424	0.00237871	9311	LOC_Os01g07376
9.92665e-08	0.23684	0.302	0.155	0.0025712	9311	LOC_Os07g22840
9.97759e-08	0.5142	0.492	0.324	0.0025844	9311	LOC_Os05g41990
1.0063e-07	0.246305	0.423	0.25	0.00260651	9311	LOC_Os10g42190
1.00778e-07	0.250394	0.258	0.109	0.00261035	9311	LOC_Os12g07550
1.0847e-07	0.523115	0.806	0.695	0.00280959	9311	LOC_Os01g47780
1.11439e-07	0.347945	0.802	0.779	0.00288648	9311	LOC_Os03g59710
1.11846e-07	0.226406	0.371	0.206	0.00289703	9311	LOC_Os02g52410
1.12088e-07	0.285201	0.52	0.357	0.00290331	9311	LOC_Os02g38840
1.12855e-07	0.538683	0.601	0.441	0.00292316	9311	LOC_Os09g20090
1.14879e-07	0.316235	0.738	0.595	0.00297559	9311	LOC_Os07g12510
1.16133e-07	0.415844	0.621	0.504	0.00300808	9311	LOC_Os09g39400
1.16162e-07	0.220944	0.431	0.267	0.00300882	9311	LOC_Os01g56580
1.21722e-07	0.25623	0.294	0.141	0.00315284	9311	LOC_Os06g06180
1.27955e-07	0.222718	0.294	0.145	0.00331429	9311	LOC_Os02g04010
1.28019e-07	0.306857	0.742	0.693	0.00331594	9311	LOC_Os08g09180
1.38366e-07	0.297315	0.48	0.315	0.00358395	9311	LOC_Os02g55910
1.56341e-07	0.274234	0.383	0.221	0.00404955	9311	LOC_Os08g03570
1.57673e-07	0.263363	0.31	0.168	0.00408406	9311	LOC_Os12g36930
1.61807e-07	0.292584	0.077	0.006	0.00419113	9311	LOC_Os07g03589
1.63964e-07	0.233965	0.278	0.137	0.004247	9311	LOC_Os06g51470
1.64395e-07	0.345949	0.843	0.824	0.00425815	9311	LOC_Os02g44940
1.85947e-07	0.264768	0.782	0.7	0.00481639	9311	LOC_Os12g44000
1.87261e-07	0.314118	0.403	0.239	0.00485044	9311	LOC_Os12g39400
1.91916e-07	0.316767	0.758	0.645	0.00497101	9311	LOC_Os07g14850
1.95681e-07	0.215804	0.931	0.855	0.00506853	9311	LOC_Os02g19770
1.99749e-07	0.631376	0.206	0.078	0.0051739	9311	LOC_Os01g02010
2.01624e-07	0.415659	0.387	0.235	0.00522246	9311	LOC_Os11g07960
2.03325e-07	0.212748	0.988	0.966	0.00526653	9311	LOC_Os06g03486
2.11751e-07	0.290535	0.79	0.702	0.00548478	9311	LOC_Os03g20780
2.22261e-07	0.426422	0.738	0.624	0.00575701	9311	LOC_Os05g03190
2.4032e-07	0.327333	0.742	0.649	0.00622477	9311	LOC_Os02g43790
2.43133e-07	0.260251	0.484	0.311	0.00629763	9311	LOC_Os03g07430
2.44216e-07	0.319216	0.351	0.212	0.00632569	9311	LOC_Os05g48310
2.56868e-07	0.273444	0.867	0.752	0.00665338	9311	LOC_Os09g21210
2.83567e-07	0.288627	0.706	0.582	0.00734495	9311	LOC_Os09g28060
2.87198e-07	0.378596	0.573	0.437	0.007439	9311	LOC_Os01g38510
2.97435e-07	0.372644	0.899	0.851	0.00770417	9311	LOC_Os03g15940
3.00892e-07	0.265631	0.242	0.105	0.00779371	9311	LOC_Os07g46830
3.02082e-07	0.286675	0.702	0.548	0.00782453	9311	LOC_Os09g29170
3.11974e-07	0.461014	0.823	0.756	0.00808075	9311	LOC_Os02g41860
3.16713e-07	0.400476	0.31	0.16	0.00820351	9311	LOC_Os04g15840
3.24044e-07	0.367693	0.315	0.164	0.00839339	9311	LOC_Os01g74152
3.36009e-07	0.222721	0.46	0.29	0.0087033	9311	LOC_Os06g44620
3.84935e-07	0.555882	0.306	0.16	0.00997059	9311	LOC_Os11g02350
4.14472e-07	0.324119	0.597	0.475	0.0107356	9311	LOC_Os03g10620
4.30988e-07	0.400601	0.722	0.641	0.0111634	9311	LOC_Os07g36140
4.36307e-07	0.214362	0.851	0.693	0.0113012	9311	LOC_Os02g11870
4.42495e-07	0.310192	0.903	0.868	0.0114615	9311	LOC_Os02g55430
4.45836e-07	0.267212	0.157	0.048	0.011548	9311	LOC_Os04g45130
4.48074e-07	0.370116	0.456	0.309	0.011606	9311	LOC_Os04g59330
4.77453e-07	0.333963	0.238	0.099	0.012367	9311	LOC_Os04g45590
4.82732e-07	0.262281	0.395	0.25	0.0125037	9311	LOC_Os01g61670
4.82797e-07	0.259562	0.286	0.147	0.0125054	9311	LOC_Os08g34720
5.17469e-07	0.403001	0.718	0.611	0.0134035	9311	LOC_Os02g38050
5.2469e-07	0.216223	0.552	0.387	0.0135905	9311	LOC_Os01g12880
5.36799e-07	0.300236	0.609	0.452	0.0139042	9311	LOC_Os01g51920
5.48922e-07	0.256655	0.629	0.55	0.0142182	9311	LOC_Os03g15590
5.61468e-07	0.260782	0.851	0.828	0.0145431	9311	LOC_Os05g34680
6.20566e-07	0.211088	0.294	0.151	0.0160739	9311	LOC_Os01g18100
6.77115e-07	0.380118	0.665	0.59	0.0175386	9311	LOC_Os03g58630
6.90576e-07	0.231447	0.415	0.263	0.0178873	9311	LOC_Os08g43480
7.13095e-07	0.248036	0.56	0.393	0.0184706	9311	LOC_Os05g04960
7.41727e-07	0.307758	0.762	0.664	0.0192122	9311	LOC_Os03g19720
8.02704e-07	0.333698	0.512	0.361	0.0207916	9311	LOC_Os07g43290
8.05993e-07	0.273522	0.448	0.284	0.0208768	9311	LOC_Os07g40630
8.69002e-07	0.23101	0.839	0.742	0.0225089	9311	LOC_Os03g16800
9.02365e-07	0.630189	0.698	0.582	0.0233731	9311	LOC_Os03g47034
9.2569e-07	0.385492	0.823	0.735	0.0239772	9311	LOC_Os09g29396
9.71149e-07	0.328504	0.504	0.366	0.0251547	9311	LOC_Os07g43070
1.0053e-06	0.383875	0.419	0.248	0.0260392	9311	LOC_Os09g36790
1.10965e-06	0.241369	0.431	0.288	0.0287421	9311	LOC_Os05g44100
1.13193e-06	0.386427	0.528	0.374	0.0293192	9311	LOC_Os01g25820
1.1374e-06	0.210571	0.173	0.061	0.0294609	9311	LOC_Os08g34984
1.21384e-06	0.288507	0.327	0.181	0.031441	9311	LOC_Os07g02460
1.25996e-06	0.225231	0.899	0.838	0.0326356	9311	LOC_Os04g54830
1.26598e-06	0.289909	0.177	0.067	0.0327915	9311	LOC_Os08g05970
1.34861e-06	0.248283	0.468	0.315	0.0349318	9311	LOC_Os01g51290
1.3782e-06	0.22238	0.464	0.309	0.0356983	9311	LOC_Os09g26900
1.39423e-06	0.310479	0.44	0.277	0.0361132	9311	LOC_Os07g33280
1.47621e-06	0.236868	0.956	0.914	0.0382368	9311	LOC_Os12g32950
1.51208e-06	0.307248	0.452	0.298	0.0391658	9311	LOC_Os07g02800
1.69535e-06	0.278851	0.577	0.433	0.0439128	9311	LOC_Os07g43900
1.72403e-06	0.34614	0.702	0.571	0.0446558	9311	LOC_Os04g57720
1.86288e-06	0.353298	0.694	0.555	0.0482522	9311	LOC_Os03g08310
2.0418e-06	0.200539	0.464	0.294	0.0528866	9311	LOC_Os02g42020
2.08676e-06	0.245557	0.306	0.172	0.0540514	9311	LOC_Os06g02180
2.32773e-06	0.48134	0.488	0.342	0.0602928	9311	LOC_Os09g39940
2.58953e-06	0.28358	0.633	0.536	0.067074	9311	LOC_Os01g01450
2.67124e-06	0.361693	0.79	0.739	0.0691903	9311	LOC_Os05g35740
2.67551e-06	0.209194	0.988	0.994	0.069301	9311	LOC_Os07g46670
2.68565e-06	0.249476	0.198	0.08	0.0695637	9311	LOC_Os03g32420
2.68818e-06	0.242845	0.935	0.88	0.0696292	9311	LOC_Os04g57200
2.85465e-06	0.341089	0.859	0.832	0.073941	9311	LOC_Os02g41820
2.94834e-06	0.25356	0.851	0.8	0.0763678	9311	LOC_Os07g09600
2.99935e-06	0.478031	0.085	0.015	0.0776892	9311	LOC_Os07g44450
3.08595e-06	0.20891	0.319	0.176	0.0799323	9311	LOC_Os06g49030
3.16405e-06	0.211616	0.367	0.223	0.0819552	9311	LOC_Os05g45490
3.18204e-06	0.239737	0.468	0.311	0.0824211	9311	LOC_Os11g14190
3.56239e-06	0.479775	0.161	0.061	0.092273	9311	LOC_Os01g67390
3.63684e-06	0.333039	0.859	0.8	0.0942015	9311	LOC_Os11g06440
3.7293e-06	1.51745	0.044	0	0.0965964	9311	LOC_Os03g07674
3.7293e-06	0.360503	0.044	0	0.0965964	9311	LOC_Os07g14330
4.41563e-06	0.221429	0.484	0.359	0.114374	9311	LOC_Os05g47530
4.43062e-06	0.256684	0.964	0.966	0.114762	9311	LOC_Os06g46770
4.90227e-06	0.259829	0.278	0.147	0.126979	9311	LOC_Os01g59970
4.93612e-06	0.475065	0.585	0.414	0.127855	9311	LOC_Os09g32500
5.04665e-06	0.282913	0.786	0.7	0.130718	9311	LOC_Os01g04010
5.18424e-06	0.208487	0.415	0.273	0.134282	9311	LOC_Os05g48855
5.3917e-06	0.362866	0.875	0.824	0.139656	9311	LOC_Os01g62230
5.40602e-06	0.433722	0.073	0.011	0.140027	9311	LOC_Os03g52355
5.47226e-06	0.213494	0.23	0.111	0.141743	9311	LOC_Os02g41580
5.61567e-06	0.316321	0.246	0.12	0.145457	9311	LOC_Os05g45450
5.97466e-06	0.353871	0.851	0.798	0.154756	9311	LOC_Os04g58710
6.37948e-06	0.350526	0.835	0.744	0.165241	9311	LOC_Os05g41550
6.43492e-06	0.20482	0.44	0.294	0.166677	9311	LOC_Os08g01850
6.57397e-06	0.239466	0.387	0.239	0.170279	9311	LOC_Os08g27720
6.70152e-06	0.251998	0.879	0.792	0.173583	9311	LOC_Os01g55510
6.7867e-06	0.215253	0.359	0.221	0.175789	9311	LOC_Os03g20760
6.85869e-06	0.304757	0.819	0.796	0.177654	9311	LOC_Os05g41900
6.92742e-06	0.269917	0.605	0.492	0.179434	9311	LOC_Os03g14250
6.94949e-06	0.272253	0.544	0.408	0.180006	9311	LOC_Os02g57400
7.74887e-06	0.221843	0.282	0.162	0.200711	9311	LOC_Os01g07910
7.97243e-06	0.21778	0.903	0.905	0.206502	9311	LOC_Os01g24070
9.14372e-06	0.240749	0.399	0.267	0.236841	9311	LOC_Os12g01390
9.41022e-06	0.207038	0.98	0.985	0.243744	9311	LOC_Os07g43730
1.00404e-05	0.205163	0.681	0.54	0.260067	9311	LOC_Os01g08670
1.00539e-05	0.287821	0.44	0.311	0.260417	9311	LOC_Os01g58130
1.01093e-05	0.253697	0.698	0.618	0.261852	9311	LOC_Os08g45070
1.02914e-05	0.257298	0.234	0.116	0.266569	9311	LOC_Os05g45070
1.04569e-05	0.387508	0.04	0	0.270856	9311	LOC_Os03g07700
1.04569e-05	0.362946	0.04	0	0.270856	9311	LOC_Os10g31485
1.06168e-05	0.246944	0.532	0.378	0.274996	9311	LOC_Os06g04790
1.09181e-05	0.280844	0.738	0.687	0.282801	9311	LOC_Os09g16760
1.10003e-05	0.34129	0.935	0.922	0.284929	9311	LOC_Os02g13380
1.11867e-05	0.432298	0.629	0.55	0.289757	9311	LOC_Os04g57560
1.16394e-05	0.236781	0.944	0.908	0.301483	9311	LOC_Os01g21440
1.20951e-05	0.294932	0.722	0.63	0.313287	9311	LOC_Os02g54780
1.2489e-05	0.204888	0.899	0.88	0.32349	9311	LOC_Os09g38560
1.2563e-05	0.218305	0.347	0.221	0.325406	9311	LOC_Os12g12260
1.27586e-05	0.284056	0.407	0.261	0.330473	9311	LOC_Os03g62060
1.56562e-05	0.453469	0.867	0.868	0.405527	9311	LOC_Os01g16140
1.58225e-05	0.338363	0.585	0.458	0.409835	9311	LOC_Os05g35500
1.64394e-05	0.200488	0.363	0.227	0.425813	9311	LOC_Os05g49080
1.67947e-05	0.271581	0.944	0.922	0.435017	9311	LOC_Os05g48930
1.80069e-05	0.335012	0.794	0.758	0.466416	9311	LOC_Os06g42720
1.95646e-05	0.27437	0.653	0.538	0.506763	9311	LOC_Os01g35040
2.06759e-05	0.228272	0.351	0.216	0.535548	9311	LOC_Os01g42520
2.11837e-05	0.375407	0.085	0.019	0.548699	9311	LOC_Os01g12190
2.14594e-05	0.240674	0.415	0.263	0.555843	9311	LOC_Os04g54620
2.16821e-05	0.243953	0.411	0.284	0.561609	9311	LOC_Os01g09020
2.18364e-05	0.249331	0.573	0.443	0.565606	9311	LOC_Os01g04580
2.25061e-05	0.200611	0.387	0.254	0.582954	9311	LOC_Os09g25290
2.26938e-05	0.268862	0.52	0.412	0.587815	9311	LOC_Os03g30830
2.27369e-05	0.201228	0.964	0.983	0.588932	9311	LOC_Os06g04030
2.35925e-05	0.312823	0.54	0.42	0.611094	9311	LOC_Os07g36190
2.36354e-05	0.275817	0.319	0.197	0.612203	9311	LOC_Os10g37230
2.42277e-05	0.541473	0.524	0.437	0.627545	9311	LOC_Os04g44060
2.6294e-05	0.24889	0.972	0.981	0.681066	9311	LOC_Os07g07040
2.7025e-05	0.285775	0.411	0.286	0.7	9311	LOC_Os02g30320
2.8106e-05	0.206151	0.359	0.233	0.728002	9311	LOC_Os12g05980
2.93661e-05	0.214294	0.036	0	0.760641	9311	LOC_Os04g55950
2.93994e-05	0.2642	0.552	0.45	0.761504	9311	LOC_Os03g17020
2.94986e-05	0.207206	0.202	0.095	0.764074	9311	LOC_Os12g40260
2.95155e-05	0.275423	0.391	0.258	0.76451	9311	LOC_Os12g09640
3.14041e-05	0.238965	0.565	0.479	0.813429	9311	LOC_Os01g46932
3.31281e-05	0.253194	0.948	0.937	0.858083	9311	LOC_Os06g46970
3.41021e-05	0.384584	0.274	0.164	0.883311	9311	LOC_Os04g36820
3.89822e-05	0.24653	0.327	0.202	1	9311	LOC_Os01g40630
4.05874e-05	0.371226	0.431	0.294	1	9311	LOC_Os01g07300
4.25426e-05	0.226165	0.25	0.137	1	9311	LOC_Os04g35250
4.34874e-05	0.272773	0.629	0.513	1	9311	LOC_Os01g72360
4.42327e-05	0.237244	0.653	0.527	1	9311	LOC_Os02g16620
4.43157e-05	0.33579	0.069	0.013	1	9311	LOC_Os01g14540
4.56439e-05	0.226222	0.363	0.242	1	9311	LOC_Os02g50970
4.60656e-05	0.213888	0.54	0.422	1	9311	LOC_Os08g44430
4.64432e-05	0.252072	0.238	0.126	1	9311	LOC_Os09g13570
4.77984e-05	0.215145	0.665	0.567	1	9311	LOC_Os05g39670
4.82257e-05	0.237694	0.859	0.792	1	9311	LOC_Os01g53520
5.20391e-05	0.324867	0.609	0.536	1	9311	LOC_Os02g40890
5.54218e-05	0.216186	0.383	0.261	1	9311	LOC_Os09g07294
5.6648e-05	0.245882	0.359	0.235	1	9311	LOC_Os02g36330
6.45704e-05	0.365651	0.56	0.389	1	9311	LOC_Os01g15610
7.23621e-05	0.229389	0.532	0.424	1	9311	LOC_Os06g51150
7.30334e-05	0.275181	0.327	0.204	1	9311	LOC_Os01g37810
7.62214e-05	0.358809	0.056	0.008	1	9311	LOC_Os01g73720
7.64974e-05	0.276415	0.645	0.544	1	9311	LOC_Os07g39280
7.72082e-05	0.277693	0.843	0.809	1	9311	LOC_Os03g12820
7.76502e-05	0.359094	0.431	0.307	1	9311	LOC_Os03g32230
8.01377e-05	0.212918	0.508	0.401	1	9311	LOC_Os03g06070
8.03737e-05	0.23956	0.492	0.38	1	9311	LOC_Os09g32080
8.31587e-05	0.254874	0.145	0.059	1	9311	LOC_Os05g02060
8.33506e-05	0.202622	0.718	0.641	1	9311	LOC_Os07g06680
8.37517e-05	0.228057	0.27	0.153	1	9311	LOC_Os03g12110
8.48493e-05	0.242655	0.79	0.752	1	9311	LOC_Os02g26700
9.0703e-05	0.227928	0.782	0.729	1	9311	LOC_Os10g43060
9.70508e-05	0.266508	0.569	0.454	1	9311	LOC_Os01g32780
0.00010399	0.390288	0.185	0.092	1	9311	LOC_Os03g04080
0.00011018	0.269639	0.508	0.403	1	9311	LOC_Os05g38830
0.000110656	0.23846	0.589	0.517	1	9311	LOC_Os02g51410
0.000113128	0.517965	0.786	0.695	1	9311	LOC_Os04g35090
0.000119724	0.202629	0.919	0.882	1	9311	LOC_Os01g66120
0.000120442	0.240302	0.819	0.771	1	9311	LOC_Os01g32380
0.000124959	0.233883	0.73	0.66	1	9311	LOC_Os03g01740
0.000131187	0.30249	0.738	0.664	1	9311	LOC_Os09g24440
0.000150411	0.208464	0.565	0.439	1	9311	LOC_Os03g16700
0.000157436	0.284795	0.79	0.735	1	9311	LOC_Os02g21250
0.000160323	0.241778	0.472	0.355	1	9311	LOC_Os02g53790
0.000161451	0.200077	0.98	0.994	1	9311	LOC_Os07g40580
0.000162401	0.217028	0.903	0.893	1	9311	LOC_Os06g04230
0.000175515	0.205974	0.395	0.284	1	9311	LOC_Os11g09329
0.00017569	0.204684	0.931	0.878	1	9311	LOC_Os02g37930
0.000184984	0.242753	0.681	0.586	1	9311	LOC_Os09g34860
0.000194681	0.243819	0.722	0.693	1	9311	LOC_Os01g42700
0.000197879	0.318015	0.31	0.202	1	9311	LOC_Os06g49770
0.000198339	0.22328	0.871	0.845	1	9311	LOC_Os04g02830
0.000206626	0.213943	0.214	0.118	1	9311	LOC_Os07g05940
0.000211573	0.211377	0.403	0.282	1	9311	LOC_Os07g01440
0.000213482	0.324173	0.899	0.868	1	9311	LOC_Os04g54210
0.000214522	0.226464	0.593	0.477	1	9311	LOC_Os09g38070
0.00022493	0.332996	0.629	0.563	1	9311	LOC_Os03g25940
0.000225814	0.233993	0.423	0.307	1	9311	LOC_Os01g72810
0.000227191	0.233641	0.528	0.426	1	9311	LOC_Os06g11990
0.000233611	0.235736	0.028	0	1	9311	LOC_Os09g29710
0.000249047	0.219463	0.484	0.372	1	9311	LOC_Os02g40700
0.000279235	0.245297	0.992	0.989	1	9311	LOC_Os07g08840
0.000282278	0.234099	0.448	0.372	1	9311	LOC_Os07g05950
0.000286342	0.209478	0.782	0.662	1	9311	LOC_Os08g43620
0.000286734	0.204645	0.266	0.168	1	9311	LOC_Os03g44650
0.000293739	0.212014	0.327	0.212	1	9311	LOC_Os11g43049
0.000302989	0.267201	0.609	0.485	1	9311	LOC_Os03g27230
0.000307833	0.278184	0.504	0.41	1	9311	LOC_Os12g07490
0.000320256	0.240369	0.762	0.693	1	9311	LOC_Os02g12480
0.00032367	0.474732	0.488	0.376	1	9311	LOC_Os05g34170
0.000325157	0.249498	0.484	0.376	1	9311	LOC_Os03g07400
0.000332302	0.202613	0.577	0.468	1	9311	LOC_Os04g31610
0.000337671	0.234488	0.427	0.315	1	9311	LOC_Os04g49620
0.000340151	0.256516	0.411	0.313	1	9311	LOC_Os10g42690
0.000341212	0.234093	0.444	0.319	1	9311	LOC_Os03g10050
0.000364043	0.208374	0.649	0.532	1	9311	LOC_Os03g21030
0.000413116	0.237454	0.605	0.534	1	9311	LOC_Os09g35960
0.00043649	0.288357	0.774	0.721	1	9311	LOC_Os11g01530
0.000438695	0.281091	0.403	0.311	1	9311	LOC_Os01g55280
0.000449988	0.248362	0.54	0.454	1	9311	LOC_Os06g07830
0.000483583	0.274394	0.649	0.592	1	9311	LOC_Os03g38970
0.000509581	0.238263	0.617	0.534	1	9311	LOC_Os06g43660
0.000510742	0.281577	0.54	0.45	1	9311	LOC_Os07g44440
0.000523666	0.22832	0.274	0.174	1	9311	LOC_Os01g08130
0.000556017	0.202968	0.738	0.649	1	9311	LOC_Os02g02600
0.000562247	0.213863	0.778	0.729	1	9311	LOC_Os07g25420
0.000580034	0.276058	0.419	0.319	1	9311	LOC_Os05g29000
0.000590063	0.247732	0.548	0.426	1	9311	LOC_Os02g34460
0.000599305	0.273378	0.746	0.687	1	9311	LOC_Os04g28990
0.000616012	0.292287	0.27	0.181	1	9311	LOC_Os11g32030
0.000649602	0.868618	0.149	0.074	1	9311	LOC_Os03g63390
0.000663807	0.854367	0.024	0	1	9311	LOC_Os06g40870
0.000690585	0.225576	0.774	0.71	1	9311	LOC_Os01g14440
0.000692565	0.216128	0.407	0.3	1	9311	LOC_Os05g51520
0.000700313	0.22519	0.198	0.109	1	9311	LOC_Os04g16970
0.000732967	0.210358	0.403	0.296	1	9311	LOC_Os05g01480
0.000774945	0.24801	0.544	0.447	1	9311	LOC_Os02g40040
0.000841142	0.27382	0.496	0.384	1	9311	LOC_Os06g08080
0.000849109	0.227309	0.415	0.326	1	9311	LOC_Os06g40060
0.000866998	0.453831	0.407	0.311	1	9311	LOC_Os05g45440
0.000915212	0.254726	0.407	0.309	1	9311	LOC_Os03g54050
0.000932363	0.306209	0.746	0.765	1	9311	LOC_Os02g07410
0.00101405	0.220747	0.282	0.191	1	9311	LOC_Os03g58170
0.00102129	0.29661	0.883	0.828	1	9311	LOC_Os11g47760
0.00102341	0.268346	0.722	0.639	1	9311	LOC_Os03g40270
0.00105246	0.222018	0.565	0.473	1	9311	LOC_Os05g04620
0.00107867	0.273952	0.488	0.414	1	9311	LOC_Os02g55134
0.00108342	0.210214	0.153	0.078	1	9311	LOC_Os09g13650
0.00109284	0.254763	0.423	0.317	1	9311	LOC_Os03g57640
0.00113001	0.209847	0.452	0.359	1	9311	LOC_Os02g40690
0.0011543	0.200776	0.552	0.475	1	9311	LOC_Os02g04520
0.0012037	0.206521	0.69	0.637	1	9311	LOC_Os10g42710
0.00120658	0.412525	0.573	0.502	1	9311	LOC_Os05g39054
0.00120688	0.212475	0.645	0.559	1	9311	LOC_Os02g43930
0.00126711	0.335706	0.855	0.863	1	9311	LOC_Os08g06550
0.0013123	0.341325	0.681	0.643	1	9311	LOC_Os01g52730
0.00137106	0.23575	0.44	0.382	1	9311	LOC_Os02g53060
0.00137748	0.265673	0.742	0.706	1	9311	LOC_Os02g44820
0.00144338	0.4177	0.431	0.342	1	9311	LOC_Os02g45200
0.0015737	0.26676	0.29	0.2	1	9311	LOC_Os01g72130
0.00157996	0.354881	0.665	0.597	1	9311	LOC_Os04g38610
0.00158458	0.29659	0.444	0.345	1	9311	LOC_Os09g35020
0.00162487	0.252475	0.129	0.063	1	9311	LOC_Os03g50160
0.00167167	0.278235	0.371	0.298	1	9311	LOC_Os01g12090
0.0018705	0.200227	0.278	0.191	1	9311	LOC_Os12g08090
0.00189627	0.240254	0.544	0.452	1	9311	LOC_Os09g07350
0.0019065	0.218697	0.444	0.357	1	9311	LOC_Os05g01270
0.0019348	0.278502	0.722	0.628	1	9311	LOC_Os02g55060
0.0019855	0.209777	0.355	0.248	1	9311	LOC_Os05g31970
0.00231955	0.200391	0.306	0.218	1	9311	LOC_Os01g10680
0.00241786	0.397755	0.665	0.559	1	9311	LOC_Os02g02890
0.0025346	0.212472	0.157	0.088	1	9311	LOC_Os02g51930
0.00266336	0.221885	0.887	0.832	1	9311	LOC_Os04g42930
0.00275681	0.272578	0.161	0.09	1	9311	LOC_Os03g50960
0.00276548	0.48421	0.056	0.017	1	9311	LOC_Os05g47700
0.00298628	0.203406	0.21	0.137	1	9311	LOC_Os03g22680
0.00328196	0.203181	0.19	0.113	1	9311	LOC_Os01g51310
0.0033183	0.232758	0.524	0.454	1	9311	LOC_Os11g32110
0.0037495	0.214678	0.153	0.086	1	9311	LOC_Os01g62110
0.00392359	0.31345	0.024	0.002	1	9311	LOC_Os05g06780
0.00418596	0.265613	0.48	0.405	1	9311	LOC_Os12g26880
0.00422595	0.229426	0.698	0.643	1	9311	LOC_Os12g40890
0.00514116	0.224874	0.536	0.435	1	9311	LOC_Os03g02040
0.00530595	0.244155	0.435	0.38	1	9311	LOC_Os01g12730
0.00544985	0.221051	0.113	0.057	1	9311	LOC_Os10g42130
0.00549108	0.362076	0.339	0.252	1	9311	LOC_Os03g61490
0.00579741	0.283019	0.637	0.611	1	9311	LOC_Os08g35710
0.00642383	0.241096	0.395	0.309	1	9311	LOC_Os01g49710
0.00649192	0.521571	0.726	0.662	1	9311	LOC_Os11g47809
0.0064959	0.281649	0.782	0.798	1	9311	LOC_Os05g01560
0.00653561	0.286374	0.984	0.987	1	9311	LOC_Os04g44870
0.00681474	0.285695	0.52	0.473	1	9311	LOC_Os04g54300
0.00757099	0.268203	0.831	0.805	1	9311	LOC_Os08g02120
0.00762154	0.443636	0.109	0.057	1	9311	LOC_Os06g02490
0.007786	0.20945	0.988	0.983	1	9311	LOC_Os03g59220
0.00798313	0.221291	0.407	0.334	1	9311	LOC_Os09g31970
0.00844662	0.346587	0.649	0.59	1	9311	LOC_Os04g37880
0.00893325	0.235667	0.468	0.422	1	9311	LOC_Os03g29190
0.00997605	0.216799	0.403	0.336	1	9311	LOC_Os03g31679
0.00998599	0.239263	0.565	0.498	1	9311	LOC_Os08g35110
1.08917e-112	3.72324	1	0	2.82118e-108	Nip	EVM0012725
4.63055e-111	2.31798	0.992	0	1.1994e-106	Nip	LOC_Os01g54739
2.97754e-110	1.87069	0.987	0	7.71241e-106	Nip	EVM0044414
1.89704e-109	2.53112	0.983	0	4.91371e-105	Nip	LOC_Os11g11980
5.04503e-109	2.91949	0.983	0.016	1.30676e-104	Nip	LOC_Os11g10520
1.73584e-105	1.90309	0.962	0	4.49617e-101	Nip	LOC_Os01g60410
1.04703e-104	1.64446	0.958	0	2.71201e-100	Nip	Add_EVM0009533
1.04703e-104	3.61534	0.958	0	2.71203e-100	Nip	LOC_Os02g11859
1.04703e-104	1.68198	0.958	0	2.71203e-100	Nip	LOC_Os03g54980
1.34845e-103	1.58955	1	0.887	3.49275e-99	Nip	LOC_Os02g07910
8.99474e-103	2.3141	0.947	0	2.32982e-98	Nip	LOC_Os03g08024
5.25779e-102	1.94165	0.943	0	1.36187e-97	Nip	LOC_Os09g30418
3.04618e-101	3.29048	0.939	0	7.89022e-97	Nip	LOC_Os02g48714
1.22519e-100	2.30308	0.975	0.29	3.17349e-96	Nip	LOC_Os05g27780
4.17791e-100	1.60354	0.933	0	1.08216e-95	Nip	LOC_Os05g47446
9.95673e-100	2.82315	0.931	0	2.57899e-95	Nip	LOC_Os06g05020
5.0079e-97	2.75646	0.987	0.367	1.29715e-92	Nip	LOC_Os07g33997
2.23722e-96	1.58002	0.912	0	5.79484e-92	Nip	LOC_Os04g37774
5.21655e-96	2.43	0.91	0	1.35119e-91	Nip	LOC_Os07g36264
1.21375e-95	2.3907	0.908	0	3.14386e-91	Nip	LOC_Os06g05010
6.52836e-95	2.36773	0.903	0	1.69098e-90	Nip	LOC_Os10g38501
8.23874e-93	2.6573	0.95	0.25	2.134e-88	Nip	LOC_Os10g36703
5.01623e-92	1.53767	0.887	0	1.2993e-87	Nip	LOC_Os10g34802
6.32573e-92	1.67475	0.895	0.024	1.63849e-87	Nip	LOC_Os03g21040
3.35554e-91	1.6593	0.95	0.294	8.69152e-87	Nip	LOC_Os06g38210
5.85171e-91	2.03819	0.88	0	1.51571e-86	Nip	LOC_Os02g37290
1.32156e-90	1.64299	0.878	0	3.42311e-86	Nip	LOC_Os07g28644
2.97841e-90	1.53331	0.876	0	7.71468e-86	Nip	LOC_Os12g35590
1.50335e-89	2.04417	0.872	0	3.89397e-85	Nip	LOC_Os03g13140
1.22906e-88	1.12953	0.992	0.722	3.18352e-84	Nip	LOC_Os03g53190
3.73562e-88	1.29349	0.863	0	9.67602e-84	Nip	LOC_Os06g33919
1.97842e-86	1.45112	0.853	0	5.12449e-82	Nip	LOC_Os01g05959
4.96485e-86	1.85842	0.933	0.302	1.28599e-81	Nip	LOC_Os05g45020
2.20876e-85	1.14761	0.989	0.742	5.72114e-81	Nip	LOC_Os03g48110
9.95564e-85	1.80335	0.842	0	2.57871e-80	Nip	LOC_Os01g52594
9.95571e-85	1.52403	0.842	0	2.57873e-80	Nip	LOC_Os09g29270
1.08509e-84	1.31601	0.992	0.669	2.81059e-80	Nip	LOC_Os03g22810
6.20676e-84	1.74053	0.916	0.258	1.60768e-79	Nip	LOC_Os02g50600
1.02613e-82	1.80541	0.83	0	2.65789e-78	Nip	LOC_Os03g56241
2.09126e-80	2.12413	0.815	0	5.41679e-76	Nip	LOC_Os10g38495
4.43463e-80	1.24988	0.813	0	1.14866e-75	Nip	LOC_Os02g10370
9.3856e-80	2.49308	0.811	0	2.43106e-75	Nip	LOC_Os10g40520
3.79282e-78	1.30201	0.84	0.105	9.82416e-74	Nip	LOC_Os06g49490
5.18558e-78	1.59122	0.979	0.56	1.34317e-73	Nip	LOC_Os05g25850
6.88306e-78	1.79639	0.832	0.077	1.78285e-73	Nip	LOC_Os04g27860
1.69021e-77	1.52781	0.796	0	4.37799e-73	Nip	LOC_Os05g10650
1.52045e-76	1.94089	0.79	0	3.93827e-72	Nip	LOC_Os04g32710
2.34937e-76	1.23915	0.794	0.008	6.08533e-72	Nip	LOC_Os07g37100
1.00811e-75	2.04655	0.79	0.012	2.61121e-71	Nip	LOC_Os07g37760
2.03102e-75	1.63049	0.964	0.528	5.26075e-71	Nip	LOC_Os02g16040
2.76925e-75	1.10849	0.782	0	7.17292e-71	Nip	LOC_Os05g43252
1.62505e-74	1.36181	0.876	0.27	4.20921e-70	Nip	LOC_Os08g37320
1.16583e-73	1.80613	0.819	0.097	3.01973e-69	Nip	LOC_Os06g11290
8.55099e-72	1.26804	0.845	0.165	2.21488e-67	Nip	LOC_Os01g52500
2.25497e-70	1.67478	0.748	0	5.84083e-66	Nip	LOC_Os08g10500
1.24717e-69	1.53702	0.987	0.665	3.23042e-65	Nip	LOC_Os02g44500
1.76205e-69	1.35298	0.882	0.29	4.56406e-65	Nip	LOC_Os07g49114
1.78244e-69	1.01793	0.742	0	4.61688e-65	Nip	LOC_Os05g10414
1.13938e-68	1.26468	0.962	0.52	2.95121e-64	Nip	LOC_Os01g59900
2.73609e-68	1.53396	0.733	0	7.08703e-64	Nip	Add_EVM0015885
2.08207e-67	1.17034	0.727	0	5.39298e-63	Nip	LOC_Os04g17084
1.00053e-66	1.43611	0.922	0.456	2.59158e-62	Nip	LOC_Os02g38980
3.03932e-66	0.939989	0.718	0	7.87245e-62	Nip	LOC_Os01g01700
1.27628e-65	1.64872	0.777	0.097	3.30583e-61	Nip	LOC_Os04g52361
1.58578e-65	1.07862	0.845	0.246	4.1075e-61	Nip	LOC_Os09g25314
8.59726e-65	1.3532	0.893	0.298	2.22686e-60	Nip	LOC_Os12g42980
7.9833e-63	0.863036	0.693	0	2.06783e-58	Nip	LOC_Os11g14544
8.52097e-62	1.08785	0.739	0.065	2.2071e-57	Nip	LOC_Os01g68060
1.97226e-61	1.43414	0.683	0	5.10855e-57	Nip	LOC_Os03g60760
3.72643e-61	0.80963	0.681	0	9.6522e-57	Nip	LOC_Os03g20790
7.02893e-61	0.877455	0.679	0	1.82063e-56	Nip	LOC_Os09g15044
1.17974e-60	1.26907	0.729	0.073	3.05576e-56	Nip	LOC_Os01g06560
7.2271e-60	0.945474	0.7	0.028	1.87196e-55	Nip	LOC_Os03g16480
9.59764e-60	1.47577	0.727	0.052	2.48598e-55	Nip	LOC_Os10g38360
4.32575e-59	0.92523	0.782	0.161	1.12046e-54	Nip	LOC_Os07g08410
3.33964e-58	1.12928	0.905	0.5	8.65034e-54	Nip	LOC_Os04g58880
3.71795e-58	1.22818	0.723	0.065	9.63024e-54	Nip	LOC_Os06g05470
2.27746e-57	1.4187	0.754	0.165	5.89907e-53	Nip	LOC_Os02g55600
5.50463e-57	1.03752	0.658	0.012	1.42581e-52	Nip	LOC_Os06g09900
5.42636e-56	0.847808	0.689	0.052	1.40554e-51	Nip	LOC_Os03g58040
6.36271e-56	0.959101	0.708	0.085	1.64807e-51	Nip	LOC_Os05g50654
2.93226e-55	1.02901	0.634	0	7.59514e-51	Nip	LOC_Os05g02240
2.93226e-55	0.751307	0.634	0	7.59514e-51	Nip	LOC_Os04g32330
5.33365e-55	0.769514	0.632	0	1.38152e-50	Nip	LOC_Os09g27744
9.68614e-55	0.807261	0.63	0	2.5089e-50	Nip	LOC_Os01g50934
9.68616e-55	1.5031	0.63	0	2.50891e-50	Nip	LOC_Os09g10274
3.25898e-54	0.835364	0.756	0.181	8.44141e-50	Nip	LOC_Os01g01369
2.36804e-52	0.877973	0.805	0.282	6.13369e-48	Nip	LOC_Os06g12690
7.00985e-52	0.89483	0.664	0.056	1.81569e-47	Nip	LOC_Os02g51670
1.1014e-51	1.76813	0.605	0	2.85285e-47	Nip	LOC_Os03g16030
3.1158e-50	0.872761	0.695	0.109	8.07055e-46	Nip	LOC_Os12g42850
9.23195e-50	1.01658	0.666	0.097	2.39126e-45	Nip	LOC_Os01g68790
9.42704e-50	0.82298	0.676	0.085	2.44179e-45	Nip	LOC_Os03g18870
1.5087e-49	0.948356	0.824	0.29	3.90783e-45	Nip	LOC_Os05g41780
1.7663e-49	1.22908	0.655	0.077	4.57508e-45	Nip	LOC_Os04g02530
3.26697e-49	1.04431	0.584	0	8.46209e-45	Nip	LOC_Os01g03144
3.65276e-49	0.987981	0.746	0.153	9.46139e-45	Nip	LOC_Os04g17660
4.90215e-49	0.90773	0.798	0.286	1.26975e-44	Nip	LOC_Os11g35020
1.35847e-48	1.36428	0.809	0.274	3.51871e-44	Nip	LOC_Os08g30510
3.05156e-48	0.61861	0.576	0	7.90416e-44	Nip	LOC_Os03g59740
7.25261e-48	1.17822	0.941	0.512	1.87857e-43	Nip	LOC_Os10g30150
2.03507e-47	0.885513	0.756	0.222	5.27123e-43	Nip	LOC_Os01g57450
3.87366e-47	1.41121	0.769	0.242	1.00335e-42	Nip	LOC_Os03g38000
1.43782e-46	0.855836	0.561	0	3.72424e-42	Nip	LOC_Os07g12780
1.9342e-46	0.667043	0.952	0.778	5.00995e-42	Nip	LOC_Os09g31260
4.94333e-46	1.25099	0.83	0.399	1.28042e-41	Nip	LOC_Os03g55540
7.33103e-46	0.937288	0.555	0	1.89888e-41	Nip	LOC_Os11g47574
2.15591e-45	0.646689	0.55	0	5.58425e-41	Nip	LOC_Os08g13280
2.78796e-45	1.36359	0.655	0.113	7.22138e-41	Nip	LOC_Os12g01400
3.6891e-45	0.593261	0.548	0	9.55551e-41	Nip	LOC_Os09g32169
6.30344e-45	0.937837	0.546	0	1.63272e-40	Nip	LOC_Os03g07104
6.81557e-45	0.679573	0.653	0.117	1.76537e-40	Nip	LOC_Os01g15260
2.17e-44	0.614857	0.548	0.008	5.62074e-40	Nip	LOC_Os06g16270
3.1174e-44	0.764586	0.54	0	8.0747e-40	Nip	LOC_Os12g28015
3.11742e-44	0.598132	0.54	0	8.07473e-40	Nip	LOC_Os08g13699
1.5868e-43	0.94973	0.679	0.149	4.11013e-39	Nip	LOC_Os02g07010
1.92618e-43	0.928983	0.624	0.089	4.98919e-39	Nip	LOC_Os02g45810
2.04196e-43	1.00616	0.718	0.258	5.28909e-39	Nip	LOC_Os05g49880
2.57459e-43	0.558979	0.532	0	6.66871e-39	Nip	LOC_Os04g23140
2.92286e-43	0.683771	0.771	0.306	7.57079e-39	Nip	LOC_Os08g04390
3.36222e-43	1.36478	0.866	0.46	8.70882e-39	Nip	LOC_Os01g67134
3.48698e-43	1.39092	0.649	0.141	9.03198e-39	Nip	LOC_Os09g39500
4.34905e-43	0.77881	0.529	0	1.12649e-38	Nip	LOC_Os06g30924
9.31255e-43	1.22969	0.735	0.278	2.41214e-38	Nip	LOC_Os08g33920
1.24027e-42	0.795129	0.637	0.117	3.21255e-38	Nip	LOC_Os08g04440
1.75787e-42	1.43841	0.712	0.242	4.55323e-38	Nip	LOC_Os04g34970
2.07859e-42	0.923671	0.523	0	5.38395e-38	Nip	LOC_Os07g26744
3.10281e-42	1.04387	0.874	0.504	8.03691e-38	Nip	LOC_Os07g12340
3.49144e-42	1.14757	0.521	0	9.04354e-38	Nip	LOC_Os12g36220
3.94537e-42	0.676811	0.817	0.403	1.02193e-37	Nip	LOC_Os07g12150
7.3085e-42	0.730096	0.588	0.056	1.89305e-37	Nip	LOC_Os10g28340
8.11059e-42	0.736223	0.668	0.161	2.10081e-37	Nip	LOC_Os03g21550
1.02246e-41	0.901049	1	0.98	2.64838e-37	Nip	LOC_Os03g17690
1.64087e-41	0.625404	0.515	0	4.25018e-37	Nip	LOC_Os12g03800
3.82008e-41	0.597604	0.611	0.085	9.89478e-37	Nip	LOC_Os12g10560
4.57194e-41	0.695277	0.511	0	1.18422e-36	Nip	LOC_Os10g28254
9.25446e-41	0.997222	0.903	0.48	2.39709e-36	Nip	LOC_Os07g47790
1.41283e-40	0.772652	0.515	0.008	3.65951e-36	Nip	LOC_Os05g40630
3.49118e-40	0.544543	0.502	0	9.04286e-36	Nip	LOC_Os08g04010
8.79595e-40	0.776355	0.506	0.008	2.27833e-35	Nip	LOC_Os05g10930
9.08748e-40	1.08119	0.786	0.355	2.35384e-35	Nip	LOC_Os08g34150
1.58083e-39	0.525008	0.496	0	4.09468e-35	Nip	LOC_Os03g10700
1.58084e-39	0.602994	0.496	0	4.09469e-35	Nip	LOC_Os12g42884
2.60822e-39	0.68519	0.494	0	6.75582e-35	Nip	LOC_Os02g26790
2.60823e-39	0.685826	0.494	0	6.75584e-35	Nip	LOC_Os12g13674
3.58784e-39	0.839729	0.983	0.762	9.29321e-35	Nip	LOC_Os11g10480
1.04238e-38	0.525703	0.515	0.02	2.69998e-34	Nip	LOC_Os07g36410
1.07458e-38	1.33149	0.658	0.145	2.78337e-34	Nip	LOC_Os10g18340
2.13568e-38	0.864299	0.853	0.44	5.53184e-34	Nip	LOC_Os05g44922
3.19424e-38	0.598022	0.599	0.101	8.27373e-34	Nip	LOC_Os02g51890
6.10788e-38	0.607993	0.998	0.931	1.58206e-33	Nip	LOC_Os10g08550
6.24626e-38	0.952885	0.664	0.185	1.61791e-33	Nip	LOC_Os09g15670
1.03e-37	0.71484	0.618	0.121	2.66791e-33	Nip	LOC_Os01g32080
1.11246e-37	0.682093	0.794	0.363	2.8815e-33	Nip	LOC_Os05g39110
1.1757e-37	0.901692	0.557	0.073	3.0453e-33	Nip	LOC_Os12g02570
1.36459e-37	0.723459	0.477	0	3.53457e-33	Nip	LOC_Os03g37864
1.87908e-37	0.790322	0.588	0.097	4.8672e-33	Nip	LOC_Os02g02780
2.56043e-37	1.01013	0.712	0.282	6.63202e-33	Nip	LOC_Os03g15270
3.2944e-37	0.975785	0.977	0.871	8.53316e-33	Nip	LOC_Os02g33070
3.62151e-37	0.536732	0.473	0	9.38044e-33	Nip	LOC_Os02g38392
3.62152e-37	0.714531	0.473	0	9.38045e-33	Nip	LOC_Os12g02589
8.13208e-37	0.578348	0.586	0.101	2.10637e-32	Nip	LOC_Os10g32520
1.53548e-36	0.580905	1	0.996	3.97721e-32	Nip	LOC_Os03g46770
1.65438e-36	1.14426	0.66	0.173	4.28518e-32	Nip	LOC_Os05g28740
2.15423e-36	1.19833	0.792	0.403	5.57988e-32	Nip	LOC_Os06g36160
4.06096e-36	0.783148	0.462	0	1.05187e-31	Nip	LOC_Os07g37466
4.50141e-36	0.465594	0.477	0.008	1.16596e-31	Nip	LOC_Os01g69850
8.92814e-36	0.487754	0.538	0.048	2.31257e-31	Nip	LOC_Os11g36430
1.05819e-35	0.557472	0.458	0	2.74093e-31	Nip	LOC_Os12g15505
1.61115e-35	0.791883	0.803	0.383	4.1732e-31	Nip	LOC_Os05g34710
1.77287e-35	0.962718	0.813	0.448	4.59208e-31	Nip	LOC_Os04g02050
4.40826e-35	0.44788	0.452	0	1.14183e-30	Nip	LOC_Os09g19734
7.07489e-35	0.60541	0.45	0	1.83254e-30	Nip	LOC_Os11g11960
7.07491e-35	0.510744	0.45	0	1.83254e-30	Nip	LOC_Os03g19040
1.05349e-34	0.68162	0.473	0.02	2.72874e-30	Nip	LOC_Os05g34500
1.13402e-34	0.755664	0.447	0	2.93733e-30	Nip	LOC_Os05g39320
3.42197e-34	0.620224	0.704	0.254	8.86359e-30	Nip	LOC_Os01g38480
4.77526e-34	0.720855	0.513	0.052	1.23689e-29	Nip	LOC_Os07g33660
5.40226e-34	0.831587	0.714	0.302	1.39929e-29	Nip	LOC_Os01g16030
7.39084e-34	0.651171	0.439	0	1.91437e-29	Nip	LOC_Os05g43794
7.39814e-34	0.590752	0.452	0.008	1.91627e-29	Nip	LOC_Os10g39410
8.8542e-34	0.497074	0.443	0.004	2.29342e-29	Nip	LOC_Os05g40770
8.90652e-34	0.514683	0.513	0.056	2.30697e-29	Nip	LOC_Os05g47470
9.77141e-34	0.525939	0.63	0.169	2.53099e-29	Nip	LOC_Os10g41520
1.62512e-33	0.414987	0.458	0.012	4.2094e-29	Nip	LOC_Os08g37480
2.03662e-33	1.26373	0.746	0.306	5.27525e-29	Nip	LOC_Os08g04360
2.08509e-33	0.706742	0.819	0.456	5.40081e-29	Nip	LOC_Os01g34614
2.2843e-33	0.78425	0.845	0.492	5.91681e-29	Nip	LOC_Os01g64520
5.31e-33	0.763396	0.874	0.573	1.3754e-28	Nip	LOC_Os03g25270
7.48143e-33	0.484594	0.429	0	1.93784e-28	Nip	LOC_Os07g12390
7.48144e-33	0.430086	0.429	0	1.93784e-28	Nip	LOC_Os12g25490
1.08607e-32	0.521059	0.58	0.117	2.81315e-28	Nip	LOC_Os07g41820
1.21543e-32	0.942124	0.544	0.117	3.14821e-28	Nip	LOC_Os05g48220
1.87203e-32	0.462278	0.424	0	4.84894e-28	Nip	LOC_Os03g08059
2.18191e-32	0.529703	0.515	0.065	5.65157e-28	Nip	LOC_Os12g16350
2.95576e-32	0.612555	0.422	0	7.65602e-28	Nip	LOC_Os01g05610
3.59541e-32	1.14705	0.725	0.335	9.31284e-28	Nip	LOC_Os11g05530
7.22899e-32	0.912787	0.561	0.121	1.87245e-27	Nip	LOC_Os06g22960
8.96372e-32	0.661193	0.704	0.266	2.32178e-27	Nip	LOC_Os01g60190
1.07361e-31	1.20439	0.807	0.431	2.78087e-27	Nip	LOC_Os05g06310
1.15489e-31	0.591937	0.416	0	2.99139e-27	Nip	LOC_Os01g06220
1.81454e-31	0.735562	0.414	0	4.70002e-27	Nip	LOC_Os02g29774
2.67629e-31	0.923938	0.725	0.25	6.93211e-27	Nip	LOC_Os07g41350
2.84749e-31	0.487027	0.412	0	7.37556e-27	Nip	LOC_Os03g32499
5.61421e-31	0.548265	0.517	0.085	1.45419e-26	Nip	LOC_Os12g37870
6.58096e-31	0.624005	0.443	0.024	1.7046e-26	Nip	LOC_Os03g18770
7.01378e-31	0.511118	0.462	0.036	1.81671e-26	Nip	LOC_Os10g41460
7.92175e-31	0.792575	0.655	0.238	2.05189e-26	Nip	LOC_Os01g55240
1.01147e-30	0.657715	0.641	0.214	2.6199e-26	Nip	LOC_Os10g42299
1.09242e-30	0.435437	0.405	0	2.8296e-26	Nip	LOC_Os12g29344
1.95302e-30	0.792052	0.538	0.113	5.0587e-26	Nip	LOC_Os08g43210
2.45935e-30	0.651365	0.817	0.508	6.37021e-26	Nip	LOC_Os05g09490
3.39033e-30	0.620906	0.569	0.133	8.78164e-26	Nip	LOC_Os03g10640
3.55121e-30	0.672511	0.985	0.923	9.19835e-26	Nip	LOC_Os05g33380
3.97467e-30	0.434871	0.433	0.024	1.02952e-25	Nip	LOC_Os03g18820
4.1458e-30	0.528928	0.399	0	1.07385e-25	Nip	LOC_Os12g32380
4.1458e-30	0.507786	0.399	0	1.07385e-25	Nip	LOC_Os08g08570
5.7431e-30	0.693462	0.559	0.125	1.48758e-25	Nip	LOC_Os11g35330
7.24024e-30	0.454983	0.441	0.036	1.87537e-25	Nip	LOC_Os02g06370
8.39455e-30	0.687614	0.5	0.081	2.17436e-25	Nip	LOC_Os10g36924
1.05873e-29	0.691362	0.662	0.25	2.74232e-25	Nip	LOC_Os01g32770
1.18085e-29	0.51034	0.462	0.048	3.05863e-25	Nip	LOC_Os02g06330
1.85334e-29	0.956273	0.578	0.133	4.80052e-25	Nip	LOC_Os01g66900
1.98637e-29	0.526834	0.607	0.173	5.14508e-25	Nip	LOC_Os01g64970
2.60346e-29	0.792845	0.809	0.383	6.74348e-25	Nip	LOC_Os03g18850
3.77447e-29	0.726299	0.723	0.347	9.77663e-25	Nip	LOC_Os09g36830
4.32853e-29	0.827247	0.584	0.181	1.12118e-24	Nip	LOC_Os07g42740
5.78184e-29	0.42302	0.387	0	1.49761e-24	Nip	LOC_Os06g24711
7.83816e-29	1.12479	0.66	0.266	2.03024e-24	Nip	LOC_Os11g38959
9.86231e-29	0.584098	0.576	0.181	2.55453e-24	Nip	LOC_Os08g05530
1.00354e-28	0.62115	0.534	0.113	2.59936e-24	Nip	LOC_Os06g47130
1.06892e-28	0.455612	0.513	0.093	2.76872e-24	Nip	LOC_Os06g37000
1.34411e-28	0.521007	0.626	0.214	3.4815e-24	Nip	LOC_Os12g41500
1.37866e-28	0.412273	0.382	0	3.571e-24	Nip	LOC_Os01g33450
1.56488e-28	0.474184	0.525	0.109	4.05335e-24	Nip	LOC_Os08g04180
1.79573e-28	0.482351	0.452	0.048	4.65129e-24	Nip	LOC_Os08g36170
1.89553e-28	0.420715	0.393	0.008	4.90979e-24	Nip	LOC_Os01g19400
2.11373e-28	1.13934	0.777	0.427	5.475e-24	Nip	LOC_Os06g05000
2.12515e-28	0.434996	0.38	0	5.50455e-24	Nip	LOC_Os10g35100
4.02568e-28	0.665907	0.895	0.653	1.04273e-23	Nip	LOC_Os05g38140
5.03195e-28	0.375256	0.376	0	1.30338e-23	Nip	LOC_Os01g57250
5.92867e-28	0.657756	0.523	0.109	1.53565e-23	Nip	LOC_Os08g28710
6.63824e-28	0.475052	0.542	0.113	1.71944e-23	Nip	LOC_Os10g39870
9.80751e-28	1.16408	0.693	0.363	2.54034e-23	Nip	LOC_Os07g10720
2.55116e-27	0.524125	0.498	0.097	6.608e-23	Nip	LOC_Os09g23650
2.70942e-27	1.04751	0.891	0.722	7.01794e-23	Nip	LOC_Os08g34800
3.07947e-27	0.613958	0.7	0.298	7.97645e-23	Nip	LOC_Os04g37904
5.68209e-27	0.526419	0.414	0.036	1.47177e-22	Nip	LOC_Os07g38370
9.91247e-27	1.11313	0.361	0	2.56753e-22	Nip	LOC_Os03g02775
1.74422e-26	0.911068	0.954	0.867	4.51787e-22	Nip	LOC_Os03g07870
1.97227e-26	0.613308	0.786	0.492	5.10856e-22	Nip	LOC_Os07g07350
2.03334e-26	0.393591	0.397	0.024	5.26677e-22	Nip	LOC_Os02g52940
2.29913e-26	0.519108	0.357	0	5.9552e-22	Nip	LOC_Os02g57350
2.29913e-26	0.527395	0.357	0	5.95521e-22	Nip	LOC_Os05g26630
2.29913e-26	0.428624	0.357	0	5.95521e-22	Nip	LOC_Os11g45890
2.77011e-26	0.810375	0.996	0.988	7.17513e-22	Nip	LOC_Os01g55830
3.49558e-26	0.620057	0.355	0	9.05424e-22	Nip	LOC_Os03g18230
4.72206e-26	0.802848	0.742	0.383	1.22311e-21	Nip	LOC_Os05g14240
5.30866e-26	0.392633	0.353	0	1.37505e-21	Nip	LOC_Os07g08934
7.49959e-26	0.428492	0.424	0.056	1.94254e-21	Nip	LOC_Os02g34830
8.05311e-26	0.51622	0.351	0	2.08592e-21	Nip	LOC_Os10g38314
1.1884e-25	0.6046	0.527	0.121	3.07819e-21	Nip	LOC_Os01g25484
1.22027e-25	0.465302	0.349	0	3.16075e-21	Nip	LOC_Os04g03920
1.28082e-25	0.486941	0.439	0.069	3.31757e-21	Nip	LOC_Os08g32690
1.31041e-25	0.676685	0.422	0.048	3.39421e-21	Nip	LOC_Os06g35560
1.51982e-25	0.787063	0.443	0.073	3.93665e-21	Nip	LOC_Os07g42450
2.41428e-25	0.74475	0.555	0.177	6.25347e-21	Nip	LOC_Os06g05930
2.48944e-25	0.508998	0.931	0.698	6.44816e-21	Nip	LOC_Os06g23440
2.60361e-25	0.826993	0.845	0.593	6.74387e-21	Nip	LOC_Os05g03590
2.71939e-25	0.722463	0.683	0.286	7.04377e-21	Nip	LOC_Os02g15700
3.39295e-25	0.615057	0.67	0.27	8.78841e-21	Nip	LOC_Os06g13870
3.7329e-25	0.850091	0.649	0.262	9.66897e-21	Nip	LOC_Os03g55770
3.81179e-25	0.397905	1	0.992	9.87331e-21	Nip	LOC_Os06g07969
4.2764e-25	1.11181	0.58	0.202	1.10767e-20	Nip	LOC_Os11g30760
5.39496e-25	0.90795	0.828	0.52	1.3974e-20	Nip	LOC_Os10g30790
5.40927e-25	0.331709	0.361	0.012	1.40111e-20	Nip	LOC_Os08g13320
6.36202e-25	0.323125	0.34	0	1.64789e-20	Nip	LOC_Os01g26070
6.36203e-25	0.308867	0.34	0	1.64789e-20	Nip	LOC_Os08g42290
6.36203e-25	0.305972	0.34	0	1.64789e-20	Nip	LOC_Os11g21296
6.36203e-25	0.288687	0.34	0	1.64789e-20	Nip	LOC_Os11g28480
6.91283e-25	0.356873	0.374	0.02	1.79056e-20	Nip	LOC_Os04g38480
9.53363e-25	0.339569	0.351	0.008	2.4694e-20	Nip	LOC_Os05g03820
9.58693e-25	0.345943	0.338	0	2.48321e-20	Nip	LOC_Os07g13834
1.33263e-24	0.33409	0.363	0.016	3.45178e-20	Nip	LOC_Os07g39900
1.44306e-24	0.507551	0.336	0	3.73783e-20	Nip	LOC_Os04g36319
1.44306e-24	0.312276	0.336	0	3.73783e-20	Nip	LOC_Os02g53330
1.86386e-24	0.580414	0.517	0.129	4.82777e-20	Nip	LOC_Os06g37620
2.09685e-24	0.749033	0.714	0.383	5.43127e-20	Nip	LOC_Os04g44900
2.12574e-24	0.898846	0.807	0.496	5.5061e-20	Nip	LOC_Os02g44990
2.14561e-24	0.362627	0.395	0.04	5.55755e-20	Nip	LOC_Os12g28270
2.16978e-24	0.383846	0.334	0	5.62017e-20	Nip	LOC_Os11g29500
2.24962e-24	0.778114	0.464	0.101	5.82696e-20	Nip	LOC_Os02g26430
2.81008e-24	0.503747	0.475	0.101	7.27867e-20	Nip	LOC_Os03g03510
3.17785e-24	0.751127	0.748	0.46	8.23126e-20	Nip	LOC_Os01g12000
3.66377e-24	0.369251	0.338	0.004	9.4899e-20	Nip	LOC_Os02g38340
4.88938e-24	0.79847	0.33	0	1.26645e-19	Nip	LOC_Os09g31031
7.16393e-24	0.817988	0.744	0.387	1.8556e-19	Nip	LOC_Os04g59150
7.32764e-24	0.350063	0.328	0	1.89801e-19	Nip	LOC_Os03g22720
1.50286e-23	0.545841	0.752	0.488	3.89271e-19	Nip	LOC_Os02g20280
1.53303e-23	0.331251	0.366	0.024	3.97086e-19	Nip	LOC_Os09g16714
1.56048e-23	0.488794	0.632	0.29	4.04195e-19	Nip	LOC_Os06g46700
1.6405e-23	0.355513	0.324	0	4.24921e-19	Nip	LOC_Os05g49684
1.6405e-23	0.303436	0.324	0	4.24921e-19	Nip	LOC_Os06g07869
1.942e-23	0.836327	0.538	0.181	5.03017e-19	Nip	LOC_Os04g50970
1.97175e-23	0.600199	0.601	0.242	5.10722e-19	Nip	LOC_Os03g21370
2.07064e-23	0.50398	0.58	0.185	5.36336e-19	Nip	LOC_Os05g33940
2.58726e-23	0.806992	0.968	0.891	6.70151e-19	Nip	LOC_Os12g42876
2.8302e-23	0.311211	0.334	0.008	7.33079e-19	Nip	LOC_Os08g11220
3.15866e-23	0.319388	0.328	0.004	8.18157e-19	Nip	LOC_Os07g26000
3.28746e-23	1.04343	0.439	0.081	8.51518e-19	Nip	LOC_Os05g03960
5.45113e-23	0.288342	0.317	0	1.41195e-18	Nip	LOC_Os11g20330
5.59197e-23	0.882392	0.489	0.129	1.44843e-18	Nip	LOC_Os07g35480
6.43215e-23	0.308598	0.376	0.036	1.66606e-18	Nip	LOC_Os09g30310
8.11699e-23	0.305524	0.315	0	2.10246e-18	Nip	LOC_Os09g20579
1.0672e-22	0.394197	0.477	0.121	2.76426e-18	Nip	LOC_Os08g08650
1.11184e-22	0.790657	0.821	0.54	2.87988e-18	Nip	LOC_Os02g56990
1.20737e-22	0.285939	0.313	0	3.12734e-18	Nip	LOC_Os04g46893
1.288e-22	0.449093	0.597	0.23	3.33618e-18	Nip	LOC_Os03g13970
1.31994e-22	0.291702	0.319	0.004	3.41892e-18	Nip	LOC_Os02g39920
1.68408e-22	0.957329	0.798	0.528	4.36211e-18	Nip	LOC_Os08g23710
3.48749e-22	0.30113	0.334	0.016	9.03329e-18	Nip	LOC_Os02g29550
3.69939e-22	0.503671	0.901	0.71	9.58216e-18	Nip	LOC_Os02g33080
3.9484e-22	0.479162	0.307	0	1.02271e-17	Nip	LOC_Os06g50650
3.9484e-22	0.255891	0.307	0	1.02272e-17	Nip	LOC_Os10g38630
4.16853e-22	0.551674	0.731	0.407	1.07973e-17	Nip	LOC_Os01g19130
4.73779e-22	0.497316	0.353	0.028	1.22718e-17	Nip	LOC_Os10g25900
5.84835e-22	0.346094	0.305	0	1.51484e-17	Nip	LOC_Os04g11980
6.24788e-22	0.778058	0.426	0.081	1.61833e-17	Nip	LOC_Os02g56460
6.60567e-22	0.708458	0.479	0.141	1.711e-17	Nip	LOC_Os04g24140
8.00029e-22	0.282519	0.34	0.02	2.07223e-17	Nip	LOC_Os07g07680
8.65346e-22	0.342344	0.303	0	2.24142e-17	Nip	LOC_Os06g41240
8.65346e-22	0.284238	0.303	0	2.24142e-17	Nip	LOC_Os02g43519
9.87855e-22	0.31647	0.391	0.056	2.55874e-17	Nip	LOC_Os01g15600
1.07941e-21	0.848873	0.968	0.823	2.79588e-17	Nip	LOC_Os10g27174
1.09125e-21	0.506794	0.332	0.02	2.82655e-17	Nip	LOC_Os06g04950
1.15939e-21	0.348995	0.315	0.008	3.00304e-17	Nip	LOC_Os04g01280
1.23591e-21	0.330186	0.389	0.056	3.20125e-17	Nip	LOC_Os03g18700
1.35777e-21	0.37523	0.376	0.052	3.51689e-17	Nip	LOC_Os04g44400
1.45205e-21	0.464401	0.767	0.44	3.76111e-17	Nip	LOC_Os01g34700
1.46709e-21	0.320418	0.328	0.016	3.80005e-17	Nip	LOC_Os10g30600
1.50972e-21	0.328788	0.359	0.04	3.91048e-17	Nip	LOC_Os04g42000
1.56802e-21	0.414076	0.46	0.113	4.06148e-17	Nip	LOC_Os01g65090
1.70442e-21	0.419579	0.508	0.169	4.41478e-17	Nip	LOC_Os06g06330
1.88861e-21	0.277729	0.298	0	4.89189e-17	Nip	LOC_Os02g45120
1.91104e-21	0.640467	0.435	0.085	4.94997e-17	Nip	LOC_Os08g05960
2.32017e-21	0.794962	0.784	0.544	6.00971e-17	Nip	LOC_Os02g07890
2.57876e-21	0.32472	0.416	0.065	6.6795e-17	Nip	LOC_Os05g33110
2.78576e-21	0.288434	0.296	0	7.21566e-17	Nip	LOC_Os01g71630
2.82308e-21	0.890091	0.422	0.081	7.31233e-17	Nip	LOC_Os10g34930
3.03793e-21	0.619157	0.704	0.379	7.86885e-17	Nip	LOC_Os02g51710
3.44454e-21	0.460951	1	0.988	8.92205e-17	Nip	LOC_Os01g67860
3.54296e-21	0.352472	0.37	0.044	9.17697e-17	Nip	LOC_Os03g56000
3.61644e-21	0.463162	0.603	0.238	9.36731e-17	Nip	LOC_Os03g61990
3.74612e-21	0.514581	0.828	0.597	9.70321e-17	Nip	LOC_Os01g48444
3.86043e-21	0.471262	0.992	0.956	9.99928e-17	Nip	LOC_Os04g55920
3.87558e-21	0.392724	0.397	0.069	1.00385e-16	Nip	LOC_Os05g43830
4.00448e-21	0.515511	0.91	0.802	1.03724e-16	Nip	LOC_Os10g17280
4.10481e-21	0.280895	0.294	0	1.06323e-16	Nip	LOC_Os09g20820
4.10481e-21	0.276982	0.294	0	1.06323e-16	Nip	LOC_Os12g07710
4.10481e-21	0.268367	0.294	0	1.06323e-16	Nip	LOC_Os11g19800
4.33217e-21	0.474128	0.452	0.101	1.12212e-16	Nip	LOC_Os03g33090
6.04219e-21	0.439016	0.292	0	1.56505e-16	Nip	LOC_Os06g06490
6.04219e-21	0.375254	0.292	0	1.56505e-16	Nip	LOC_Os07g34620
6.0422e-21	0.54263	0.292	0	1.56505e-16	Nip	LOC_Os07g36504
6.0422e-21	0.262688	0.292	0	1.56505e-16	Nip	LOC_Os02g05244
8.09279e-21	0.806587	0.792	0.528	2.09619e-16	Nip	LOC_Os08g19670
8.67786e-21	0.287274	0.298	0.004	2.24774e-16	Nip	LOC_Os02g04450
8.75372e-21	0.618129	0.366	0.044	2.26739e-16	Nip	LOC_Os06g48240
8.88484e-21	0.425268	0.29	0	2.30135e-16	Nip	EVM0047284
8.88485e-21	0.283468	0.29	0	2.30135e-16	Nip	LOC_Os11g28600
1.01998e-20	0.816284	0.626	0.29	2.64194e-16	Nip	LOC_Os01g19330
1.17011e-20	0.656558	0.582	0.246	3.03083e-16	Nip	LOC_Os05g01030
1.30515e-20	0.315856	0.288	0	3.38059e-16	Nip	LOC_Os02g06760
1.43787e-20	0.551771	0.422	0.089	3.72438e-16	Nip	LOC_Os05g04210
1.71195e-20	0.372312	0.418	0.085	4.4343e-16	Nip	LOC_Os09g27700
1.78625e-20	0.305705	0.395	0.069	4.62676e-16	Nip	LOC_Os04g35700
1.78661e-20	0.459886	0.668	0.355	4.62767e-16	Nip	LOC_Os01g68940
1.83476e-20	0.580892	0.534	0.202	4.75239e-16	Nip	LOC_Os04g58920
1.91525e-20	0.252873	0.286	0	4.96088e-16	Nip	LOC_Os10g36340
2.40616e-20	0.599572	0.941	0.875	6.23244e-16	Nip	LOC_Os01g67030
3.15076e-20	0.39878	0.405	0.077	8.16111e-16	Nip	LOC_Os06g01304
3.4649e-20	0.419768	0.481	0.157	8.9748e-16	Nip	LOC_Os06g01370
4.01278e-20	0.457194	0.443	0.125	1.03939e-15	Nip	LOC_Os04g56760
4.11178e-20	0.565341	0.282	0	1.06503e-15	Nip	LOC_Os11g13490
4.11179e-20	0.292655	0.282	0	1.06504e-15	Nip	LOC_Os05g29170
4.32233e-20	0.286312	0.345	0.036	1.11957e-15	Nip	LOC_Os07g35870
6.56528e-20	0.446216	0.729	0.427	1.70054e-15	Nip	LOC_Os06g40040
6.67506e-20	0.448176	0.424	0.109	1.72897e-15	Nip	LOC_Os08g38270
7.92721e-20	0.367251	0.382	0.069	2.05331e-15	Nip	LOC_Os11g29400
8.79176e-20	0.34358	0.277	0	2.27724e-15	Nip	LOC_Os04g35534
8.79176e-20	0.291608	0.277	0	2.27724e-15	Nip	LOC_Os05g46950
8.79177e-20	0.490074	0.277	0	2.27724e-15	Nip	LOC_Os07g33784
9.93905e-20	0.437447	0.794	0.54	2.57441e-15	Nip	LOC_Os09g33810
1.11857e-19	0.379642	0.439	0.117	2.89732e-15	Nip	LOC_Os04g48710
1.28364e-19	0.258707	0.275	0	3.32488e-15	Nip	LOC_Os05g36340
1.30105e-19	0.584581	0.737	0.44	3.36997e-15	Nip	LOC_Os03g29920
1.56076e-19	0.255786	0.29	0.008	4.04269e-15	Nip	LOC_Os03g62110
1.87229e-19	0.424895	0.273	0	4.84962e-15	Nip	LOC_Os10g09684
1.87229e-19	0.26408	0.273	0	4.84962e-15	Nip	LOC_Os07g22494
2.11066e-19	0.261751	0.279	0.004	5.46704e-15	Nip	LOC_Os08g06320
2.72816e-19	0.24739	0.271	0	7.06649e-15	Nip	LOC_Os11g15000
2.72817e-19	0.490461	0.271	0	7.0665e-15	Nip	EVM0011292
3.05708e-19	0.62157	0.511	0.198	7.91845e-15	Nip	LOC_Os01g24030
3.09254e-19	0.627762	0.771	0.52	8.0103e-15	Nip	LOC_Os05g03620
3.51459e-19	0.448726	0.55	0.202	9.10349e-15	Nip	LOC_Os12g09540
3.71019e-19	0.391681	0.408	0.089	9.61014e-15	Nip	LOC_Os02g33110
4.48993e-19	0.299389	0.303	0.02	1.16298e-14	Nip	LOC_Os02g46480
5.7752e-19	0.665778	0.267	0	1.49589e-14	Nip	LOC_Os04g56040
5.77521e-19	0.220783	0.267	0	1.49589e-14	Nip	LOC_Os10g39470
6.05339e-19	0.253727	0.273	0.004	1.56795e-14	Nip	LOC_Os11g10530
8.39016e-19	0.312135	0.265	0	2.17322e-14	Nip	LOC_Os11g44680
9.87137e-19	0.574722	0.908	0.706	2.55688e-14	Nip	LOC_Os06g09450
1.03018e-18	0.321084	0.334	0.04	2.66837e-14	Nip	LOC_Os08g04470
1.21771e-18	0.26542	0.263	0	3.15411e-14	Nip	LOC_Os05g13810
1.21771e-18	0.238137	0.263	0	3.15412e-14	Nip	LOC_Os06g50520
1.36362e-18	0.262423	0.286	0.012	3.53204e-14	Nip	LOC_Os02g11830
1.42721e-18	0.4501	0.956	0.794	3.69675e-14	Nip	LOC_Os08g25720
1.59186e-18	0.380548	0.462	0.137	4.12324e-14	Nip	LOC_Os03g20670
1.70958e-18	0.670267	0.714	0.419	4.42817e-14	Nip	LOC_Os03g14450
2.16969e-18	0.793526	0.651	0.343	5.61992e-14	Nip	LOC_Os05g30500
2.37515e-18	1.15976	0.527	0.185	6.15211e-14	Nip	LOC_Os08g04340
2.55748e-18	0.282762	0.258	0	6.62438e-14	Nip	LOC_Os02g46360
2.55748e-18	0.282285	0.258	0	6.62438e-14	Nip	LOC_Os12g43640
2.87189e-18	0.342352	0.307	0.024	7.43876e-14	Nip	LOC_Os05g11810
2.88045e-18	0.227404	0.265	0.004	7.46094e-14	Nip	LOC_Os12g32180
3.0862e-18	0.53484	0.429	0.113	7.99387e-14	Nip	LOC_Os11g34080
3.28649e-18	0.755085	0.368	0.065	8.51267e-14	Nip	LOC_Os04g06520
3.29721e-18	0.330894	0.349	0.06	8.54043e-14	Nip	LOC_Os11g34230
3.60275e-18	0.41653	0.718	0.423	9.33186e-14	Nip	LOC_Os05g51500
3.6309e-18	0.417203	0.761	0.464	9.40475e-14	Nip	LOC_Os01g15010
3.70091e-18	0.208605	0.256	0	9.5861e-14	Nip	LOC_Os11g34790
4.06243e-18	0.769256	0.412	0.097	1.05225e-13	Nip	LOC_Os06g38660
4.21648e-18	0.37231	1	1	1.09215e-13	Nip	LOC_Os01g15270
4.25855e-18	0.709364	0.947	0.786	1.10305e-13	Nip	LOC_Os03g12510
4.58064e-18	0.302516	0.303	0.028	1.18648e-13	Nip	LOC_Os12g09580
4.76833e-18	0.480254	0.372	0.077	1.23509e-13	Nip	LOC_Os04g41560
5.02341e-18	0.28744	0.307	0.028	1.30116e-13	Nip	LOC_Os08g41460
5.35035e-18	0.302743	0.254	0	1.38585e-13	Nip	LOC_Os10g02270
6.34593e-18	0.270826	0.319	0.036	1.64372e-13	Nip	LOC_Os06g04130
6.4003e-18	0.662161	0.395	0.101	1.65781e-13	Nip	LOC_Os01g55110
6.75411e-18	0.265471	0.29	0.02	1.74945e-13	Nip	LOC_Os03g49990
7.12745e-18	0.286691	0.399	0.093	1.84615e-13	Nip	LOC_Os07g32450
7.7274e-18	0.225764	0.252	0	2.00155e-13	Nip	LOC_Os07g13950
7.87769e-18	0.251271	0.269	0.008	2.04048e-13	Nip	LOC_Os01g56890
9.24301e-18	0.457335	0.46	0.149	2.39412e-13	Nip	LOC_Os03g55970
9.87622e-18	0.234005	0.258	0.004	2.55814e-13	Nip	LOC_Os04g51770
1.11229e-17	0.242125	0.258	0.004	2.88105e-13	Nip	LOC_Os10g26730
1.11497e-17	0.233459	0.25	0	2.88801e-13	Nip	LOC_Os12g04790
1.11498e-17	0.245937	0.25	0	2.88801e-13	Nip	LOC_Os01g65692
1.31755e-17	0.794963	0.779	0.585	3.41272e-13	Nip	LOC_Os05g33400
1.36383e-17	0.26933	0.294	0.024	3.5326e-13	Nip	LOC_Os09g17840
1.60723e-17	0.255162	0.248	0	4.16305e-13	Nip	LOC_Os08g06415
1.81203e-17	0.599374	0.408	0.109	4.69353e-13	Nip	LOC_Os03g55680
1.82225e-17	0.335499	0.275	0.016	4.72e-13	Nip	LOC_Os05g33100
1.90876e-17	0.316741	0.389	0.097	4.94408e-13	Nip	LOC_Os01g39780
2.07989e-17	0.404765	0.433	0.141	5.38732e-13	Nip	LOC_Os04g20220
2.0805e-17	0.462543	0.254	0.004	5.38892e-13	Nip	LOC_Os07g39350
2.31459e-17	0.234051	0.246	0	5.99526e-13	Nip	LOC_Os12g34980
2.37715e-17	0.249512	0.254	0.004	6.1573e-13	Nip	LOC_Os05g48870
2.40402e-17	0.586438	0.62	0.323	6.2269e-13	Nip	LOC_Os03g47530
2.54454e-17	0.303137	0.294	0.028	6.59086e-13	Nip	LOC_Os01g43895
2.64645e-17	0.320481	0.454	0.145	6.85484e-13	Nip	LOC_Os01g42770
3.46992e-17	0.243871	0.252	0.004	8.98778e-13	Nip	LOC_Os12g41820
4.4483e-17	0.630147	0.401	0.105	1.1522e-12	Nip	LOC_Os01g58850
4.51133e-17	0.343101	0.481	0.169	1.16852e-12	Nip	LOC_Os07g26440
4.78652e-17	0.329631	0.242	0	1.2398e-12	Nip	LOC_Os02g07709
4.78652e-17	0.233738	0.242	0	1.2398e-12	Nip	LOC_Os05g43174
4.91866e-17	0.273121	0.265	0.012	1.27403e-12	Nip	LOC_Os09g22510
5.59938e-17	0.37283	0.452	0.141	1.45035e-12	Nip	LOC_Os02g58640
6.9296e-17	0.373518	0.54	0.226	1.7949e-12	Nip	LOC_Os10g21560
7.28267e-17	0.46362	0.601	0.286	1.88636e-12	Nip	LOC_Os12g25710
7.56518e-17	0.248044	0.296	0.028	1.95953e-12	Nip	LOC_Os02g21260
7.57587e-17	0.467163	0.357	0.073	1.9623e-12	Nip	LOC_Os03g58880
7.57892e-17	0.488778	0.714	0.403	1.96309e-12	Nip	LOC_Os08g43490
7.63944e-17	0.285115	0.353	0.073	1.97877e-12	Nip	LOC_Os09g01690
8.04656e-17	0.706517	0.786	0.577	2.08422e-12	Nip	LOC_Os10g26700
9.4162e-17	0.352857	0.708	0.387	2.43899e-12	Nip	LOC_Os01g66180
9.86079e-17	0.217173	0.237	0	2.55414e-12	Nip	LOC_Os01g27009
1.41333e-16	0.226552	0.235	0	3.6608e-12	Nip	LOC_Os07g40640
1.63007e-16	0.22678	0.252	0.008	4.22222e-12	Nip	LOC_Os08g13930
1.74501e-16	0.682464	0.792	0.504	4.51992e-12	Nip	LOC_Os07g47620
1.90424e-16	0.345472	0.305	0.04	4.93236e-12	Nip	LOC_Os01g14970
1.92286e-16	0.471794	0.735	0.427	4.98058e-12	Nip	LOC_Os07g08710
1.93394e-16	0.378039	0.821	0.589	5.00928e-12	Nip	LOC_Os01g18070
1.97697e-16	0.431483	0.901	0.746	5.12074e-12	Nip	LOC_Os02g27360
2.00137e-16	0.467793	0.286	0.028	5.18395e-12	Nip	LOC_Os12g06030
2.02379e-16	0.293755	0.233	0	5.24201e-12	Nip	LOC_Os05g35444
2.18117e-16	0.819682	0.653	0.387	5.64966e-12	Nip	LOC_Os09g32520
2.25781e-16	0.820757	0.563	0.27	5.84818e-12	Nip	LOC_Os02g03700
2.33919e-16	0.461023	0.578	0.282	6.05896e-12	Nip	LOC_Os10g30850
2.34326e-16	0.423678	0.912	0.754	6.0695e-12	Nip	LOC_Os11g05110
2.48195e-16	0.782957	0.578	0.355	6.42874e-12	Nip	LOC_Os03g25050
2.63696e-16	0.232806	0.307	0.04	6.83024e-12	Nip	LOC_Os06g01200
2.70985e-16	0.402239	0.908	0.754	7.01905e-12	Nip	LOC_Os03g50290
2.83342e-16	0.453733	0.456	0.157	7.33911e-12	Nip	LOC_Os04g41229
2.88207e-16	0.595071	0.794	0.637	7.46513e-12	Nip	LOC_Os01g15029
2.90454e-16	0.431452	0.542	0.238	7.52335e-12	Nip	LOC_Os03g58750
3.17687e-16	0.415908	0.788	0.512	8.22873e-12	Nip	LOC_Os03g48626
3.56403e-16	0.299788	0.447	0.153	9.23155e-12	Nip	LOC_Os04g48410
3.71679e-16	0.223966	0.271	0.024	9.62722e-12	Nip	LOC_Os03g63680
3.82436e-16	0.33493	0.477	0.181	9.90586e-12	Nip	LOC_Os03g19580
3.86104e-16	0.26147	0.252	0.012	1.00009e-11	Nip	LOC_Os12g16200
4.17959e-16	0.444574	0.992	0.96	1.0826e-11	Nip	LOC_Os01g59440
4.25997e-16	0.307197	0.389	0.101	1.10342e-11	Nip	LOC_Os02g39030
4.36891e-16	0.268717	0.311	0.048	1.13164e-11	Nip	LOC_Os05g06700
4.43024e-16	0.408582	0.454	0.153	1.14752e-11	Nip	LOC_Os04g40560
4.70157e-16	0.438406	0.63	0.335	1.2178e-11	Nip	LOC_Os01g64730
5.08087e-16	0.419112	0.966	0.815	1.31605e-11	Nip	LOC_Os03g18220
5.10266e-16	0.289188	0.321	0.052	1.32169e-11	Nip	LOC_Os07g34640
5.61569e-16	0.527749	0.819	0.569	1.45458e-11	Nip	LOC_Os03g29770
5.90323e-16	1.02514	0.248	0.012	1.52906e-11	Nip	LOC_Os10g40620
5.9087e-16	0.2951	0.227	0	1.53047e-11	Nip	LOC_Os02g50470
5.9087e-16	0.220468	0.227	0	1.53047e-11	Nip	LOC_Os11g09979
5.9087e-16	0.208857	0.227	0	1.53047e-11	Nip	LOC_Os05g32474
6.17381e-16	0.36919	0.634	0.351	1.59914e-11	Nip	LOC_Os05g27340
6.69405e-16	0.358483	0.242	0.008	1.73389e-11	Nip	LOC_Os05g33410
6.88915e-16	0.24268	0.242	0.008	1.78443e-11	Nip	LOC_Os07g30940
7.96237e-16	0.363299	0.838	0.641	2.06241e-11	Nip	LOC_Os02g54160
8.42933e-16	0.29226	0.225	0	2.18336e-11	Nip	LOC_Os08g30554
8.7334e-16	0.259894	0.37	0.085	2.26212e-11	Nip	LOC_Os02g39010
9.73422e-16	0.525648	0.922	0.758	2.52136e-11	Nip	LOC_Os03g08460
1.04845e-15	0.381324	0.859	0.698	2.7157e-11	Nip	LOC_Os06g06030
1.07226e-15	0.385933	0.519	0.23	2.77737e-11	Nip	LOC_Os03g11990
1.12516e-15	0.650793	0.462	0.165	2.91438e-11	Nip	LOC_Os08g07690
1.15549e-15	0.64211	0.903	0.823	2.99295e-11	Nip	LOC_Os07g38170
1.20141e-15	0.316174	0.223	0	3.1119e-11	Nip	LOC_Os03g28190
1.21029e-15	0.435328	0.443	0.165	3.13489e-11	Nip	LOC_Os03g50050
1.23615e-15	0.478342	0.889	0.685	3.20186e-11	Nip	LOC_Os11g33050
1.31357e-15	0.448037	0.464	0.185	3.40241e-11	Nip	LOC_Os10g33040
1.34804e-15	0.63922	0.836	0.653	3.4917e-11	Nip	LOC_Os08g43550
1.47597e-15	0.525167	0.42	0.145	3.82306e-11	Nip	LOC_Os12g25690
1.47884e-15	0.298859	0.349	0.077	3.83048e-11	Nip	LOC_Os08g03440
1.53684e-15	0.223761	0.288	0.036	3.98072e-11	Nip	LOC_Os12g35620
1.57147e-15	0.373281	0.555	0.242	4.07041e-11	Nip	LOC_Os08g26870
1.58594e-15	0.448499	0.67	0.427	4.1079e-11	Nip	LOC_Os04g56646
1.71077e-15	0.387606	0.221	0	4.43125e-11	Nip	LOC_Os03g15080
1.71077e-15	0.279775	0.221	0	4.43125e-11	Nip	LOC_Os08g13710
1.82722e-15	0.334629	0.462	0.177	4.73286e-11	Nip	LOC_Os12g01260
2.34344e-15	0.397472	0.569	0.262	6.06998e-11	Nip	LOC_Os01g21590
3.18294e-15	0.445541	0.334	0.073	8.24444e-11	Nip	LOC_Os05g49620
3.24155e-15	0.37781	0.824	0.609	8.39625e-11	Nip	LOC_Os01g08410
3.24883e-15	0.862839	0.815	0.641	8.41513e-11	Nip	LOC_Os09g31180
3.45938e-15	0.202516	0.216	0	8.96048e-11	Nip	LOC_Os08g02864
3.6864e-15	0.449144	0.739	0.484	9.54851e-11	Nip	LOC_Os03g52340
3.8701e-15	0.309932	0.456	0.149	1.00243e-10	Nip	LOC_Os02g35490
4.12082e-15	0.328411	0.237	0.012	1.06738e-10	Nip	LOC_Os03g17680
4.19886e-15	0.230121	0.223	0.004	1.08759e-10	Nip	LOC_Os01g48220
4.36273e-15	0.242216	0.233	0.008	1.13003e-10	Nip	LOC_Os04g58840
4.58614e-15	0.237889	0.374	0.097	1.1879e-10	Nip	LOC_Os09g10000
4.65023e-15	0.266253	0.41	0.121	1.2045e-10	Nip	LOC_Os09g25310
4.80076e-15	1.00724	0.744	0.528	1.24349e-10	Nip	LOC_Os11g06770
4.85016e-15	0.359493	0.597	0.302	1.25629e-10	Nip	LOC_Os03g25400
4.91254e-15	0.202028	0.214	0	1.27245e-10	Nip	LOC_Os03g52450
4.91255e-15	0.209977	0.214	0	1.27245e-10	Nip	LOC_Os09g17049
5.82599e-15	0.743082	0.29	0.048	1.50905e-10	Nip	LOC_Os07g34720
6.00751e-15	0.259976	0.279	0.036	1.55607e-10	Nip	LOC_Os03g10250
6.19549e-15	0.38999	0.693	0.411	1.60476e-10	Nip	LOC_Os12g04240
7.18123e-15	0.720071	0.62	0.355	1.86008e-10	Nip	LOC_Os01g50840
7.19186e-15	0.581359	0.529	0.238	1.86284e-10	Nip	LOC_Os05g51830
9.53093e-15	0.427294	0.887	0.681	2.4687e-10	Nip	LOC_Os01g09030
1.03216e-14	0.256081	0.387	0.109	2.67351e-10	Nip	LOC_Os02g52610
1.06716e-14	1.07997	0.504	0.21	2.76417e-10	Nip	LOC_Os03g46060
1.09961e-14	0.398012	0.565	0.29	2.84821e-10	Nip	LOC_Os12g31800
1.16163e-14	0.452755	0.697	0.423	3.00885e-10	Nip	LOC_Os02g40840
1.27806e-14	1.06683	0.67	0.464	3.31043e-10	Nip	LOC_Os06g05430
1.39918e-14	0.298706	0.208	0	3.62417e-10	Nip	LOC_Os09g26960
1.66625e-14	0.794285	0.748	0.508	4.31592e-10	Nip	LOC_Os02g56960
1.89075e-14	0.320795	0.332	0.077	4.89741e-10	Nip	LOC_Os10g36690
2.0048e-14	0.458108	0.517	0.23	5.19284e-10	Nip	LOC_Os09g21380
2.07533e-14	0.236459	0.265	0.028	5.37553e-10	Nip	LOC_Os05g45110
2.11205e-14	0.799735	0.641	0.407	5.47063e-10	Nip	LOC_Os11g44810
2.11504e-14	0.395843	0.502	0.214	5.47837e-10	Nip	LOC_Os07g41750
2.21634e-14	0.295674	0.34	0.081	5.74076e-10	Nip	LOC_Os02g08420
2.33495e-14	0.342744	0.555	0.286	6.04799e-10	Nip	LOC_Os09g07764
2.56199e-14	0.613666	0.929	0.847	6.63606e-10	Nip	LOC_Os05g48010
2.56347e-14	0.447592	0.334	0.081	6.63989e-10	Nip	LOC_Os04g43760
2.62521e-14	0.236597	0.294	0.048	6.79983e-10	Nip	LOC_Os01g18670
2.65988e-14	0.425502	0.25	0.024	6.88962e-10	Nip	LOC_Os06g48860
2.79879e-14	0.235568	0.204	0	7.24943e-10	Nip	LOC_Os02g56820
3.1835e-14	0.413567	0.54	0.25	8.24589e-10	Nip	LOC_Os03g07880
3.29442e-14	0.267947	0.347	0.089	8.53321e-10	Nip	LOC_Os01g63470
3.40814e-14	0.346722	0.366	0.105	8.82775e-10	Nip	LOC_Os05g51130
3.41323e-14	0.353579	0.532	0.27	8.84095e-10	Nip	LOC_Os02g36740
3.57316e-14	0.339086	0.607	0.315	9.2552e-10	Nip	LOC_Os11g33330
3.65764e-14	0.515058	0.233	0.016	9.47401e-10	Nip	LOC_Os12g37900
3.82035e-14	0.284807	0.225	0.012	9.89548e-10	Nip	LOC_Os12g24530
3.94481e-14	0.525358	0.576	0.31	1.02179e-09	Nip	LOC_Os02g40110
3.95136e-14	0.274907	0.414	0.129	1.02348e-09	Nip	LOC_Os03g17910
4.14417e-14	0.365813	0.674	0.387	1.07342e-09	Nip	LOC_Os10g20630
4.47908e-14	0.647439	0.847	0.653	1.16017e-09	Nip	LOC_Os10g35110
4.48226e-14	0.455882	0.62	0.367	1.16099e-09	Nip	LOC_Os11g47710
4.6397e-14	0.729264	0.847	0.625	1.20178e-09	Nip	LOC_Os04g41960
4.68892e-14	0.361892	0.359	0.101	1.21452e-09	Nip	LOC_Os06g50830
4.7237e-14	0.594145	0.924	0.778	1.22353e-09	Nip	LOC_Os03g58050
4.72833e-14	0.376471	0.46	0.202	1.22473e-09	Nip	LOC_Os06g06910
4.83924e-14	0.381561	0.498	0.202	1.25346e-09	Nip	LOC_Os10g25550
5.26413e-14	0.433531	0.265	0.036	1.36352e-09	Nip	LOC_Os02g56700
5.41302e-14	0.290432	0.998	0.992	1.40208e-09	Nip	LOC_Os06g51220
5.57853e-14	0.231873	0.2	0	1.44495e-09	Nip	LOC_Os01g08069
5.57853e-14	0.222715	0.2	0	1.44495e-09	Nip	LOC_Os06g21924
5.71016e-14	0.242771	0.311	0.06	1.47904e-09	Nip	LOC_Os11g18170
5.82037e-14	0.280612	0.439	0.169	1.50759e-09	Nip	LOC_Os12g14110
6.31669e-14	0.44811	0.767	0.573	1.63615e-09	Nip	LOC_Os03g45250
6.60079e-14	0.38224	0.897	0.754	1.70974e-09	Nip	LOC_Os06g13810
7.28021e-14	0.296856	0.256	0.032	1.88572e-09	Nip	LOC_Os03g57690
7.35085e-14	0.293684	0.382	0.125	1.90402e-09	Nip	LOC_Os08g40610
7.39555e-14	0.6539	0.931	0.883	1.9156e-09	Nip	LOC_Os07g09420
8.12988e-14	0.798861	0.527	0.242	2.1058e-09	Nip	LOC_Os10g38340
8.65595e-14	0.551535	0.777	0.54	2.24206e-09	Nip	LOC_Os05g37140
9.90425e-14	0.305923	0.468	0.181	2.5654e-09	Nip	LOC_Os10g23100
9.925e-14	0.200759	0.233	0.02	2.57077e-09	Nip	LOC_Os01g40110
1.00657e-13	0.22119	0.204	0.004	2.60722e-09	Nip	LOC_Os05g10754
1.03282e-13	0.452394	0.59	0.343	2.67522e-09	Nip	LOC_Os01g54670
1.06992e-13	0.21804	0.252	0.028	2.7713e-09	Nip	LOC_Os05g34110
1.10799e-13	0.236012	0.195	0	2.86992e-09	Nip	LOC_Os02g56440
1.31455e-13	0.364666	0.433	0.181	3.40495e-09	Nip	LOC_Os02g09600
1.34691e-13	0.201049	0.252	0.028	3.48877e-09	Nip	LOC_Os06g49530
1.47445e-13	0.803028	0.739	0.536	3.81911e-09	Nip	LOC_Os08g41470
1.48833e-13	0.413077	0.637	0.399	3.85507e-09	Nip	LOC_Os08g45040
1.4906e-13	0.401547	0.792	0.56	3.86096e-09	Nip	LOC_Os09g20350
1.50634e-13	0.359221	0.891	0.722	3.90172e-09	Nip	LOC_Os06g11800
1.55946e-13	0.203116	0.193	0	4.03931e-09	Nip	LOC_Os10g34795
1.72674e-13	0.244191	0.231	0.02	4.47261e-09	Nip	LOC_Os04g59520
2.0629e-13	0.272332	0.471	0.181	5.34333e-09	Nip	LOC_Os02g57600
2.19426e-13	0.230958	0.294	0.06	5.68357e-09	Nip	LOC_Os05g48240
2.20093e-13	0.204385	0.237	0.024	5.70085e-09	Nip	LOC_Os03g45220
2.32694e-13	0.261532	0.382	0.121	6.02724e-09	Nip	LOC_Os03g45770
2.83814e-13	0.224466	0.252	0.032	7.35136e-09	Nip	LOC_Os04g38920
2.88408e-13	0.359666	0.895	0.702	7.47035e-09	Nip	LOC_Os06g47340
2.88449e-13	0.387955	0.891	0.802	7.47141e-09	Nip	LOC_Os01g62420
3.04815e-13	0.496157	0.92	0.827	7.89531e-09	Nip	LOC_Os04g58280
3.07271e-13	0.47071	0.857	0.694	7.95894e-09	Nip	LOC_Os01g67010
3.22052e-13	0.479451	0.66	0.415	8.34179e-09	Nip	LOC_Os06g14180
3.39665e-13	0.281286	0.349	0.105	8.79799e-09	Nip	LOC_Os10g03540
4.15145e-13	0.350216	0.424	0.165	1.07531e-08	Nip	LOC_Os03g55800
4.26024e-13	0.25907	0.38	0.121	1.10349e-08	Nip	LOC_Os06g42700
4.2648e-13	0.220422	0.303	0.069	1.10467e-08	Nip	LOC_Os03g10060
4.32534e-13	0.22652	0.187	0	1.12035e-08	Nip	LOC_Os08g28784
4.42614e-13	0.305176	0.708	0.435	1.14646e-08	Nip	LOC_Os06g45510
4.45171e-13	0.340405	0.628	0.347	1.15308e-08	Nip	LOC_Os05g32310
4.53253e-13	0.402784	0.475	0.214	1.17402e-08	Nip	LOC_Os04g31804
4.58574e-13	0.305121	0.357	0.113	1.1878e-08	Nip	LOC_Os04g17050
4.75018e-13	0.255414	0.435	0.157	1.23039e-08	Nip	LOC_Os12g18860
4.83492e-13	0.259953	0.998	0.972	1.25234e-08	Nip	LOC_Os08g27850
5.1106e-13	0.29062	0.239	0.028	1.32375e-08	Nip	LOC_Os03g61060
5.40379e-13	0.317209	0.273	0.048	1.39969e-08	Nip	LOC_Os06g39880
6.06671e-13	0.422237	0.185	0	1.5714e-08	Nip	LOC_Os07g03499
6.41045e-13	0.331035	0.532	0.262	1.66044e-08	Nip	LOC_Os05g02410
7.50788e-13	0.563589	0.462	0.21	1.94469e-08	Nip	LOC_Os02g41954
7.70085e-13	0.358305	0.242	0.032	1.99467e-08	Nip	LOC_Os01g56660
8.38819e-13	0.470785	0.742	0.524	2.17271e-08	Nip	LOC_Os01g54600
8.53365e-13	0.425623	0.613	0.367	2.21039e-08	Nip	LOC_Os01g43870
8.54668e-13	0.445427	0.5	0.246	2.21376e-08	Nip	LOC_Os01g52390
8.73821e-13	0.500863	0.502	0.27	2.26337e-08	Nip	LOC_Os11g43620
1.02292e-12	0.678543	0.582	0.323	2.64958e-08	Nip	LOC_Os05g48900
1.05544e-12	0.202271	0.267	0.044	2.73379e-08	Nip	LOC_Os06g47890
1.19043e-12	0.44262	0.181	0	3.08346e-08	Nip	LOC_Os01g24710
1.22818e-12	0.421659	0.588	0.347	3.18123e-08	Nip	LOC_Os02g48390
1.27444e-12	0.280002	0.429	0.173	3.30104e-08	Nip	LOC_Os10g32880
1.30577e-12	0.477258	0.595	0.339	3.38219e-08	Nip	LOC_Os03g08440
1.33143e-12	0.446147	0.498	0.238	3.44868e-08	Nip	LOC_Os05g15530
1.40808e-12	0.242909	0.338	0.101	3.6472e-08	Nip	LOC_Os02g07820
1.52878e-12	0.384077	0.704	0.472	3.95984e-08	Nip	LOC_Os03g40010
1.54602e-12	0.606736	0.763	0.585	4.0045e-08	Nip	LOC_Os05g40820
1.55111e-12	0.470063	0.691	0.448	4.01768e-08	Nip	LOC_Os02g36940
1.58149e-12	0.411664	0.954	0.819	4.09637e-08	Nip	LOC_Os01g62244
1.69762e-12	0.474768	0.918	0.613	4.39717e-08	Nip	LOC_Os10g40510
1.73809e-12	0.324475	0.479	0.214	4.50199e-08	Nip	LOC_Os03g52490
1.77816e-12	0.346079	0.54	0.306	4.6058e-08	Nip	LOC_Os06g05670
1.88141e-12	0.415988	0.244	0.036	4.87323e-08	Nip	LOC_Os04g33600
2.15182e-12	0.232877	0.393	0.141	5.57366e-08	Nip	LOC_Os10g15390
2.15795e-12	0.334738	0.401	0.145	5.58951e-08	Nip	LOC_Os08g09350
2.28751e-12	0.243356	0.37	0.125	5.92511e-08	Nip	LOC_Os02g06480
2.30741e-12	0.202326	0.332	0.093	5.97665e-08	Nip	LOC_Os02g11750
2.32799e-12	0.304899	0.176	0	6.02996e-08	Nip	LOC_Os12g44220
2.32799e-12	0.21381	0.176	0	6.02996e-08	Nip	LOC_Os08g06210
2.32799e-12	0.203733	0.176	0	6.02996e-08	Nip	LOC_Os07g44890
2.34473e-12	0.228085	0.311	0.077	6.07332e-08	Nip	LOC_Os09g25090
2.35829e-12	0.229991	0.351	0.109	6.10845e-08	Nip	LOC_Os08g25090
2.43239e-12	0.523356	0.775	0.536	6.30038e-08	Nip	LOC_Os01g03340
2.59122e-12	0.458972	0.939	0.887	6.71179e-08	Nip	LOC_Os04g57810
2.86395e-12	0.266066	0.513	0.234	7.4182e-08	Nip	LOC_Os08g05840
2.86554e-12	0.316896	0.309	0.085	7.42232e-08	Nip	LOC_Os10g25674
2.91789e-12	0.235313	0.374	0.121	7.55793e-08	Nip	LOC_Os01g72889
3.2514e-12	0.207964	0.174	0	8.42177e-08	Nip	LOC_Os06g36380
3.28578e-12	0.308767	0.838	0.685	8.51082e-08	Nip	LOC_Os06g15360
3.33511e-12	0.387741	0.574	0.335	8.63861e-08	Nip	LOC_Os03g14570
3.45492e-12	0.455141	0.601	0.363	8.94893e-08	Nip	LOC_Os03g60620
3.53706e-12	0.374996	0.769	0.573	9.1617e-08	Nip	LOC_Os01g72430
3.6515e-12	0.246052	0.225	0.024	9.45811e-08	Nip	LOC_Os07g46852
3.74581e-12	0.307448	0.511	0.25	9.70239e-08	Nip	LOC_Os01g05140
3.76464e-12	0.6107	0.66	0.472	9.75118e-08	Nip	LOC_Os03g18580
4.23957e-12	0.25982	0.351	0.113	1.09813e-07	Nip	LOC_Os06g44080
4.2511e-12	0.334744	0.695	0.464	1.10112e-07	Nip	LOC_Os02g48010
4.45819e-12	0.388663	0.447	0.19	1.15476e-07	Nip	LOC_Os11g44310
4.53728e-12	0.260292	0.172	0	1.17525e-07	Nip	LOC_Os10g38780
4.59315e-12	0.302945	0.227	0.028	1.18972e-07	Nip	LOC_Os07g48490
4.66609e-12	0.246226	0.355	0.117	1.20861e-07	Nip	LOC_Os07g30300
4.68627e-12	0.243965	0.286	0.069	1.21384e-07	Nip	LOC_Os01g60730
4.93604e-12	0.553934	0.54	0.315	1.27853e-07	Nip	LOC_Os01g52490
5.25066e-12	0.222298	0.319	0.089	1.36003e-07	Nip	LOC_Os12g41190
5.57748e-12	0.286117	0.658	0.387	1.44468e-07	Nip	LOC_Os09g23160
5.71234e-12	0.348998	0.739	0.516	1.47961e-07	Nip	LOC_Os07g39620
5.71539e-12	0.598876	0.92	0.851	1.4804e-07	Nip	LOC_Os03g12670
5.8531e-12	0.645755	0.815	0.625	1.51607e-07	Nip	LOC_Os08g03640
6.25889e-12	0.228211	0.382	0.141	1.62118e-07	Nip	LOC_Os06g27970
7.19494e-12	0.275336	0.601	0.339	1.86363e-07	Nip	LOC_Os06g11170
7.48675e-12	0.373905	0.983	0.935	1.93922e-07	Nip	LOC_Os04g38870
7.52232e-12	0.243689	0.342	0.109	1.94843e-07	Nip	LOC_Os05g02880
7.68543e-12	0.249678	0.613	0.347	1.99068e-07	Nip	LOC_Os02g16550
8.00655e-12	0.386573	0.523	0.27	2.07386e-07	Nip	LOC_Os06g25010
9.68113e-12	0.279064	0.508	0.25	2.50761e-07	Nip	LOC_Os06g14490
9.81347e-12	0.416885	0.468	0.214	2.54189e-07	Nip	LOC_Os10g38880
1.04132e-11	0.355534	0.557	0.29	2.69722e-07	Nip	LOC_Os07g15880
1.09751e-11	0.37085	0.527	0.286	2.84277e-07	Nip	LOC_Os01g17390
1.10129e-11	0.211099	0.265	0.056	2.85255e-07	Nip	LOC_Os06g12530
1.12779e-11	0.38851	0.468	0.222	2.92119e-07	Nip	LOC_Os06g03520
1.2132e-11	0.367151	0.937	0.867	3.14243e-07	Nip	LOC_Os05g13580
1.26635e-11	0.444855	0.481	0.23	3.28009e-07	Nip	LOC_Os04g54220
1.28517e-11	0.46292	0.45	0.19	3.32884e-07	Nip	LOC_Os02g09930
1.4659e-11	0.338309	0.794	0.573	3.79699e-07	Nip	LOC_Os03g58890
1.5268e-11	0.217907	0.334	0.109	3.95471e-07	Nip	LOC_Os05g46560
1.61919e-11	0.731365	0.813	0.685	4.19402e-07	Nip	LOC_Os08g41810
1.67226e-11	0.255857	0.366	0.133	4.33148e-07	Nip	LOC_Os03g02310
1.73564e-11	0.218196	0.328	0.105	4.49566e-07	Nip	LOC_Os02g03040
1.7966e-11	0.302056	0.586	0.331	4.65356e-07	Nip	LOC_Os07g28280
1.84435e-11	0.229647	0.273	0.065	4.77724e-07	Nip	LOC_Os08g23110
1.89095e-11	0.268146	0.378	0.137	4.89793e-07	Nip	LOC_Os03g61600
1.95128e-11	0.234427	0.298	0.085	5.05421e-07	Nip	LOC_Os07g10460
1.95775e-11	0.261296	0.418	0.177	5.07098e-07	Nip	LOC_Os06g35540
2.00728e-11	0.228316	0.378	0.141	5.19925e-07	Nip	LOC_Os02g56180
2.13121e-11	0.281584	0.622	0.367	5.52027e-07	Nip	LOC_Os05g08980
2.24822e-11	0.446161	0.943	0.855	5.82335e-07	Nip	LOC_Os07g47510
2.34223e-11	0.463727	0.756	0.524	6.06685e-07	Nip	LOC_Os08g27070
2.4506e-11	0.313311	0.29	0.081	6.34755e-07	Nip	LOC_Os01g41550
2.46918e-11	0.278273	0.765	0.597	6.39568e-07	Nip	LOC_Os03g63430
2.96525e-11	0.462336	0.685	0.444	7.68059e-07	Nip	LOC_Os03g05500
2.99386e-11	0.297434	0.788	0.601	7.7547e-07	Nip	LOC_Os02g42320
3.26071e-11	0.250147	0.305	0.085	8.44589e-07	Nip	LOC_Os07g44190
3.47508e-11	0.227356	0.2	0.02	9.00115e-07	Nip	LOC_Os11g44300
3.48435e-11	0.264338	0.765	0.512	9.02517e-07	Nip	LOC_Os02g15310
3.59188e-11	0.539258	0.739	0.544	9.30369e-07	Nip	LOC_Os04g09570
3.6907e-11	0.422266	0.55	0.323	9.55966e-07	Nip	LOC_Os03g02380
3.82408e-11	0.290659	0.601	0.327	9.90514e-07	Nip	LOC_Os04g31070
3.90028e-11	0.509055	0.744	0.54	1.01025e-06	Nip	LOC_Os02g37862
4.03879e-11	0.348507	0.294	0.089	1.04613e-06	Nip	LOC_Os03g03440
4.08385e-11	0.888614	0.267	0.073	1.0578e-06	Nip	LOC_Os08g44750
4.30083e-11	0.25143	0.176	0.008	1.114e-06	Nip	LOC_Os07g46480
4.7656e-11	0.268145	0.445	0.194	1.23438e-06	Nip	LOC_Os05g04220
4.8939e-11	0.301765	0.71	0.46	1.26762e-06	Nip	LOC_Os04g32650
4.91426e-11	0.345391	0.968	0.911	1.27289e-06	Nip	LOC_Os02g07260
5.00523e-11	0.310331	0.71	0.512	1.29645e-06	Nip	LOC_Os08g40510
5.17594e-11	0.281467	0.878	0.738	1.34067e-06	Nip	LOC_Os07g33680
6.25293e-11	0.394532	0.481	0.234	1.61963e-06	Nip	LOC_Os09g29310
6.45821e-11	0.251264	0.464	0.222	1.67281e-06	Nip	LOC_Os08g37960
6.86446e-11	0.538744	0.275	0.073	1.77803e-06	Nip	LOC_Os07g26550
7.1694e-11	0.350517	0.695	0.452	1.85702e-06	Nip	LOC_Os09g24970
7.1917e-11	0.358874	0.748	0.589	1.86279e-06	Nip	LOC_Os05g30810
7.60613e-11	0.485872	0.443	0.222	1.97014e-06	Nip	LOC_Os02g12800
7.70659e-11	0.304649	0.601	0.343	1.99616e-06	Nip	LOC_Os03g57420
8.13206e-11	0.287458	0.691	0.464	2.10637e-06	Nip	LOC_Os03g47770
9.138e-11	0.251109	0.317	0.109	2.36692e-06	Nip	LOC_Os12g04160
9.3237e-11	0.751222	0.414	0.185	2.41502e-06	Nip	LOC_Os11g47600
9.58932e-11	0.433174	0.368	0.153	2.48383e-06	Nip	LOC_Os01g42190
9.98659e-11	0.361761	0.689	0.423	2.58673e-06	Nip	LOC_Os04g57770
1.03844e-10	0.393992	0.435	0.198	2.68977e-06	Nip	LOC_Os03g22730
1.05721e-10	0.220603	0.359	0.141	2.73838e-06	Nip	LOC_Os04g38330
1.0842e-10	0.211057	0.359	0.125	2.8083e-06	Nip	LOC_Os03g57500
1.08684e-10	0.751877	0.849	0.71	2.81514e-06	Nip	LOC_Os05g25920
1.09484e-10	0.318855	0.937	0.831	2.83586e-06	Nip	LOC_Os12g05110
1.09899e-10	0.402104	0.492	0.254	2.84661e-06	Nip	LOC_Os03g53070
1.12951e-10	0.454143	0.2	0.024	2.92566e-06	Nip	LOC_Os08g33710
1.15541e-10	0.413984	0.771	0.552	2.99273e-06	Nip	LOC_Os03g04020
1.17807e-10	0.328124	0.45	0.214	3.05144e-06	Nip	LOC_Os06g05660
1.19608e-10	0.480622	0.775	0.548	3.0981e-06	Nip	LOC_Os04g39980
1.19732e-10	0.343665	0.387	0.161	3.10131e-06	Nip	LOC_Os02g55890
1.21468e-10	0.303398	0.151	0	3.14626e-06	Nip	LOC_Os01g43720
1.31764e-10	0.24097	0.405	0.177	3.41295e-06	Nip	LOC_Os01g39010
1.34411e-10	0.36007	0.842	0.657	3.48152e-06	Nip	LOC_Os03g63770
1.36475e-10	0.484361	0.542	0.339	3.53498e-06	Nip	LOC_Os06g21480
1.43591e-10	0.442862	0.481	0.238	3.7193e-06	Nip	LOC_Os10g22520
1.48437e-10	0.285951	0.588	0.343	3.8448e-06	Nip	LOC_Os03g27010
1.60322e-10	0.400026	0.611	0.395	4.15265e-06	Nip	LOC_Os06g14190
1.66382e-10	0.469796	0.834	0.544	4.30963e-06	Nip	LOC_Os11g06720
1.69588e-10	0.200577	0.328	0.109	4.39267e-06	Nip	LOC_Os02g21460
1.7677e-10	0.295828	0.666	0.427	4.57871e-06	Nip	LOC_Os07g49150
1.77435e-10	0.226413	0.317	0.101	4.59592e-06	Nip	LOC_Os11g13810
1.80255e-10	0.712668	0.746	0.649	4.66897e-06	Nip	LOC_Os03g04370
1.87316e-10	0.322838	0.641	0.427	4.85186e-06	Nip	LOC_Os04g02354
1.87559e-10	0.29472	0.447	0.206	4.85814e-06	Nip	LOC_Os01g06600
2.119e-10	0.4548	0.397	0.173	5.48863e-06	Nip	LOC_Os11g35310
2.13119e-10	0.30267	0.685	0.456	5.5202e-06	Nip	LOC_Os01g66150
2.15869e-10	0.331784	0.735	0.524	5.59143e-06	Nip	LOC_Os03g07990
2.16228e-10	0.777134	0.2	0.028	5.60073e-06	Nip	LOC_Os03g01309
2.31819e-10	0.293667	0.466	0.25	6.00458e-06	Nip	LOC_Os03g32170
2.33907e-10	0.369412	0.208	0.032	6.05865e-06	Nip	LOC_Os04g39350
2.38626e-10	0.342418	0.626	0.415	6.18089e-06	Nip	LOC_Os07g44620
2.4424e-10	0.278658	0.584	0.339	6.3263e-06	Nip	LOC_Os07g03240
2.50405e-10	0.2579	0.504	0.25	6.486e-06	Nip	LOC_Os10g38950
2.68682e-10	0.282142	0.416	0.19	6.95941e-06	Nip	LOC_Os01g52110
2.73489e-10	0.355756	0.55	0.339	7.0839e-06	Nip	LOC_Os03g06390
2.81054e-10	0.215509	0.239	0.052	7.27986e-06	Nip	LOC_Os12g41390
2.84475e-10	0.299473	0.595	0.367	7.36847e-06	Nip	LOC_Os08g42440
2.96366e-10	0.258528	0.382	0.169	7.67647e-06	Nip	LOC_Os10g39810
3.06226e-10	0.232555	0.197	0.028	7.93187e-06	Nip	LOC_Os10g04270
3.11347e-10	0.244297	0.265	0.069	8.06452e-06	Nip	LOC_Os01g51890
3.12484e-10	0.368006	0.185	0.02	8.09395e-06	Nip	LOC_Os07g10440
3.12919e-10	0.380368	0.359	0.137	8.10522e-06	Nip	LOC_Os02g26720
3.15248e-10	0.278116	0.968	0.855	8.16555e-06	Nip	LOC_Os03g11960
3.1527e-10	0.433573	0.874	0.766	8.16613e-06	Nip	LOC_Os06g11150
3.25937e-10	0.242606	0.414	0.19	8.44242e-06	Nip	LOC_Os12g13320
3.44019e-10	0.232895	0.315	0.109	8.91078e-06	Nip	LOC_Os04g47120
3.5747e-10	0.209153	0.397	0.161	9.25919e-06	Nip	LOC_Os07g39780
3.60123e-10	0.489983	0.534	0.347	9.3279e-06	Nip	LOC_Os09g32532
3.61337e-10	0.911211	0.668	0.484	9.35935e-06	Nip	LOC_Os05g38040
3.62216e-10	0.368194	0.559	0.335	9.38212e-06	Nip	LOC_Os09g07460
3.62886e-10	0.277179	0.609	0.351	9.39948e-06	Nip	LOC_Os02g36870
3.86467e-10	0.349595	0.275	0.085	1.00103e-05	Nip	LOC_Os09g32320
4.00264e-10	0.641998	0.777	0.629	1.03676e-05	Nip	LOC_Os01g22490
4.09227e-10	0.233897	0.16	0.008	1.05998e-05	Nip	LOC_Os05g37060
4.32766e-10	0.279647	0.489	0.246	1.12095e-05	Nip	LOC_Os11g08300
4.55227e-10	0.500168	0.819	0.641	1.17913e-05	Nip	LOC_Os03g05980
4.76658e-10	0.235168	0.313	0.105	1.23464e-05	Nip	LOC_Os09g28220
4.96387e-10	0.563498	0.447	0.238	1.28574e-05	Nip	LOC_Os07g48730
5.256e-10	0.538115	0.849	0.706	1.36141e-05	Nip	LOC_Os05g06770
5.34497e-10	0.557389	0.282	0.089	1.38445e-05	Nip	LOC_Os09g27260
5.82792e-10	0.681245	0.798	0.46	1.50955e-05	Nip	LOC_Os10g40530
6.18534e-10	0.261066	0.429	0.202	1.60213e-05	Nip	LOC_Os08g09940
6.30406e-10	0.53864	0.666	0.427	1.63288e-05	Nip	LOC_Os02g40500
6.64416e-10	0.41806	0.532	0.331	1.72097e-05	Nip	LOC_Os03g58204
6.71776e-10	0.358176	0.84	0.738	1.74003e-05	Nip	LOC_Os01g71230
7.1644e-10	0.649307	0.317	0.113	1.85572e-05	Nip	LOC_Os04g39010
[truncated: 536 more rows]
